# Supplementary material for: Protein interaction network revealed by quantitative proteomic analysis elucidates TFIIB role in multiple aspects of the transcription cycle
Source: Research Square preprint supplement (doi:10.21203/rs.3.rs-2362556/v1), 2022-12-15
Supplement: Supplementary file 2 [file de473b278bcbb7013e29c58f.xlsx]

## Sheet: TFIIB Interactors
Supplementary Data 1: All TFIIB interactors
				Quantitative Value (Normalized Total Spectra)	Quantitative Value (Normalized Total Spectra)	Quantitative Value (Normalized Total Spectra)	Quantitative Value (Normalized Total Spectra)	Quantitative Value (Normalized Total Spectra)	Quantitative Value (Normalized Total Spectra)	Quantitative Value (Normalized Total Spectra)	Quantitative Value (Normalized Total Spectra)	Quantitative Value (Normalized Total Spectra)	Quantitative Value (Normalized Total Spectra)	Quantitative Value (Normalized Total Spectra)	Quantitative Value (Normalized Total Spectra)	Quantitative Value (Normalized Total Spectra)	Quantitative Value (Normalized Total Spectra)
				Four soluble tagged replicates				Four chromatin tagged replicates				No-tag replicates
#	Identified Proteins (2979)	Accession Number	Molecular Weight	Tag Soluble 1	Tag Soluble 2	Tag Soluble 3	Tag Soluble 4	Tag Chromatin 1	Tag Chromatin 2	Tag Chromatin 3	Tag Chromatin 4	No-Tag Chromatin 1	No-Tag Chromatin 2	No-Tag Chromatin 3	No-Tag Soluble 1	No-Tag Soluble 2	No-Tag Soluble 3
1	Elongation factor 1-alpha OS=Saccharomyces cerevisiae (strain ATCC 204508 / S288c) OX=559292 GN=TEF1 PE=1 SV=1	P02994	50	243.55	553.78	187.49	124.33	37.769	39.978	34.726	25.904	125.77	84.823	96.853	342.81	251.64	224.85
2	Protein URA2 OS=Saccharomyces cerevisiae (strain ATCC 204508 / S288c) OX=559292 GN=URA2 PE=1 SV=5	P07259	245	81.578	60.229	143.63	96.116	208.15	211.8	193.01	182.73	141.89	121.18	137.21	90.294	59.433	153.91
3	Heat shock protein SSA2 OS=Saccharomyces cerevisiae (strain ATCC 204508 / S288c) OX=559292 GN=SSA2 PE=1 SV=3	P10592	69	88.672	185.71	103.06	93.47	222.42	233.06	144.56	133.02	103.19	101.27	90.576	120.9	107.48	173.15
4	Heat shock protein SSA1 OS=Saccharomyces cerevisiae (strain ATCC 204508 / S288c) OX=559292 GN=SSA1 PE=1 SV=4	P10591	70	82.761	167.3	99.775	83.771	211.51	229.66	136.48	124.62	96.742	93.478	84.298	107.13	102.43	153.91
5	Tryptophan--tRNA ligase, cytoplasmic OS=Saccharomyces cerevisiae (strain ATCC 204508 / S288c) OX=559292 GN=WRS1 PE=1 SV=1	Q12109	49	191.53	393.16	148.02	88.18	26.019	23.817	25.843	18.203	18.274	17.311	19.729	287.72	233.94	171.95
6	Midasin OS=Saccharomyces cerevisiae (strain ATCC 204508 / S288c) OX=559292 GN=MDN1 PE=1 SV=1	Q12019	559	232.91	88.671	112.93	199.29	20.143	30.621	12.921	13.302	117.17	57.991	67.259	188.24	118.87	191.19
7	Fructose-bisphosphate aldolase OS=Saccharomyces cerevisiae (strain ATCC 204508 / S288c) OX=559292 GN=FBA1 PE=1 SV=3	P14540	40	42.563	95.363	55.918	66.135	206.47	161.61	114.68	113.42	25.798	31.159	46.633	71.929	49.317	161.13
8	ATP-dependent molecular chaperone HSC82 OS=Saccharomyces cerevisiae (strain ATCC 204508 / S288c) OX=559292 GN=HSC82 PE=1 SV=4	P15108	81	55.568	107.07	54.822	67.016	171.22	197.34	115.48	102.21	50.521	33.756	37.665	62.747	42.994	103.41
9	Acetyl-CoA carboxylase OS=Saccharomyces cerevisiae (strain ATCC 204508 / S288c) OX=559292 GN=ACC1 PE=1 SV=2	Q00955	250	18.917	16.73	43.857	48.499	167.86	199.04	176.05	134.42	35.472	25.966	32.284	65.808	29.084	69.741
10	Elongation factor 3A OS=Saccharomyces cerevisiae (strain ATCC 204508 / S288c) OX=559292 GN=YEF3 PE=1 SV=4	P16521	116	49.656	90.344	65.786	38.799	136.81	168.42	117.1	84.712	113.94	64.915	67.259	52.034	44.258	61.324
11	Fatty acid synthase subunit beta OS=Saccharomyces cerevisiae (strain ATCC 204508 / S288c) OX=559292 GN=FAS1 PE=1 SV=2	P07149	229	36.651	18.403	32.893	39.681	137.65	139.5	167.98	126.02	50.521	95.209	121.07	19.895	27.82	44.49
12	ATP-dependent molecular chaperone HSP82 OS=Saccharomyces cerevisiae (strain ATCC 204508 / S288c) OX=559292 GN=HSP82 PE=1 SV=1	P02829	81	53.203	93.69	49.339	64.371	154.43	179.47	109.02	96.613	44.072	31.159	33.181	64.277	40.465	93.789
13	Vacuolar protein sorting-associated protein 13 OS=Saccharomyces cerevisiae (strain ATCC 204508 / S288c) OX=559292 GN=VPS13 PE=1 SV=1	Q07878	358	206.9	85.325	103.06	72.307	106.59	132.69	93.68	91.013	11.824	28.563	22.42	30.608	73.343	88.979
14	V-type proton ATPase subunit B OS=Saccharomyces cerevisiae (strain ATCC 204508 / S288c) OX=559292 GN=VMA2 PE=1 SV=2	P16140	58	79.214	93.69	63.593	61.726	114.15	130.99	90.449	89.612	64.495	60.588	58.291	81.112	74.607	101
15	Fatty acid synthase subunit alpha OS=Saccharomyces cerevisiae (strain ATCC 204508 / S288c) OX=559292 GN=FAS2 PE=1 SV=2	P19097	207	20.099	8.3652	30.7	29.981	135.97	128.44	153.44	112.72	38.697	102.13	132.72	4.5912	15.174	36.073
16	Cell division control protein 48 OS=Saccharomyces cerevisiae (strain ATCC 204508 / S288c) OX=559292 GN=CDC48 PE=1 SV=3	P25694	92	27.193	38.48	27.411	23.808	104.07	120.78	83.181	74.21	168.76	100.4	100.44	26.017	18.968	39.68
17	Glyceraldehyde-3-phosphate dehydrogenase 3 OS=Saccharomyces cerevisiae (strain ATCC 204508 / S288c) OX=559292 GN=TDH3 PE=1 SV=3	P00359	36	79.214	147.23	86.618	59.08	44.484	34.024	29.881	28.004	106.42	51.932	59.188	128.55	102.43	86.575
18	Heat shock protein homolog SSE1 OS=Saccharomyces cerevisiae (strain ATCC 204508 / S288c) OX=559292 GN=SSE1 PE=1 SV=4	P32589	77	42.563	61.902	47.147	48.499	129.25	145.45	113.06	85.412	24.723	33.756	32.284	38.26	29.084	61.324
19	eIF-2-alpha kinase activator GCN1 OS=Saccharomyces cerevisiae (strain ATCC 204508 / S288c) OX=559292 GN=GCN1 PE=1 SV=1	P33892	297	69.755	25.096	105.26	50.262	49.519	91.864	92.872	70.71	93.518	63.184	87.885	45.912	32.878	56.514
20	V-type proton ATPase catalytic subunit A OS=Saccharomyces cerevisiae (strain ATCC 204508 / S288c) OX=559292 GN=VMA1 PE=1 SV=3	P17255	119	61.479	63.575	55.918	52.026	86.449	91.864	73.49	82.611	35.472	48.47	53.807	78.051	55.639	85.372
21	ATP-dependent 6-phosphofructokinase subunit alpha OS=Saccharomyces cerevisiae (strain ATCC 204508 / S288c) OX=559292 GN=PFK1 PE=1 SV=1	P16861	108	39.016	36.807	37.279	37.035	178.77	109.73	120.33	107.11	9.6742	17.311	19.729	29.078	25.291	99.801
22	DNA-directed RNA polymerase II subunit RPB1 OS=Saccharomyces cerevisiae (strain ATCC 204508 / S288c) OX=559292 GN=RPO21 PE=1 SV=2	P04050	192	54.386	56.883	74.557	49.381	97.36	104.62	80.758	71.41	73.094	47.605	54.704	24.487	18.968	43.287
23	ATP-dependent 6-phosphofructokinase subunit beta OS=Saccharomyces cerevisiae (strain ATCC 204508 / S288c) OX=559292 GN=PFK2 PE=1 SV=4	P16862	105	40.198	61.902	28.507	37.917	154.43	103.77	96.91	109.22	6.4495	10.386	25.11	30.608	18.968	96.194
24	Ribosome-associated molecular chaperone SSB2 OS=Saccharomyces cerevisiae (strain ATCC 204508 / S288c) OX=559292 GN=SSB2 PE=1 SV=2	P40150	67	55.568	92.017	55.918	40.563	55.395	63.794	50.878	51.107	105.34	73.571	84.298	91.825	63.226	63.729
25	Elongation factor 2 OS=Saccharomyces cerevisiae (strain ATCC 204508 / S288c) OX=559292 GN=EFT1 PE=1 SV=1	P32324	93	62.662	83.652	76.75	57.317	55.395	85.059	56.531	44.106	56.97	48.47	52.014	88.764	60.697	58.919
26	Ribosome-associated molecular chaperone SSB1 OS=Saccharomyces cerevisiae (strain ATCC 204508 / S288c) OX=559292 GN=SSB1 PE=1 SV=3	P11484	67	56.75	93.69	52.629	39.681	52.877	58.691	47.647	52.507	103.19	71.84	84.298	85.703	61.962	62.526
27	General negative regulator of transcription subunit 5 OS=Saccharomyces cerevisiae (strain ATCC 204508 / S288c) OX=559292 GN=NOT5 PE=1 SV=1	Q12514	66	133.6	207.46	119.51	79.362	17.626	18.713	15.344	20.303	18.274	21.638	14.349	134.68	112.54	93.789
28	Glyceraldehyde-3-phosphate dehydrogenase 2 OS=Saccharomyces cerevisiae (strain ATCC 204508 / S288c) OX=559292 GN=TDH2 PE=1 SV=3	P00358	36	67.391	115.44	78.943	54.671	37.769	28.92	23.42	21.703	91.368	38.084	45.736	104.07	85.988	79.36
29	Elongation factor 1-beta OS=Saccharomyces cerevisiae (strain ATCC 204508 / S288c) OX=559292 GN=EFB1 PE=1 SV=4	P32471	23	46.11	76.96	12.061	23.808	87.288	96.117	59.761	61.609	119.32	51.932	60.982	6.1216	3.7936	67.336
30	Pyruvate kinase 1 OS=Saccharomyces cerevisiae (strain ATCC 204508 / S288c) OX=559292 GN=CDC19 PE=1 SV=2	P00549	55	80.396	113.77	94.293	56.435	38.608	27.219	29.881	25.203	29.023	38.949	39.459	119.37	88.517	74.55
31	Clathrin heavy chain OS=Saccharomyces cerevisiae (strain ATCC 204508 / S288c) OX=559292 GN=CHC1 PE=1 SV=1	P22137	187	26.01	20.076	37.279	26.454	94.842	94.416	92.872	76.311	58.045	63.184	60.982	10.713	10.116	20.441
32	Transposon Ty1-ER1 Gag-Pol polyprotein OS=Saccharomyces cerevisiae (strain ATCC 204508 / S288c) OX=559292 GN=TY1B-ER1 PE=3 SV=1	Q03612	199	74.485	110.42	95.39	59.08	22.661	29.771	28.265	28.704	40.847	54.529	51.117	68.868	97.369	73.348
33	Transposon Ty1-OL Gag-Pol polyprotein OS=Saccharomyces cerevisiae (strain ATCC 204508 / S288c) OX=559292 GN=TY1B-OL PE=3 SV=1	Q12273	199	0	0	0	59.08	0	0	0	0	41.922	55.395	48.427	68.868	97.369	73.348
34	Heat shock protein 60, mitochondrial OS=Saccharomyces cerevisiae (strain ATCC 204508 / S288c) OX=559292 GN=HSP60 PE=1 SV=1	P19882	61	55.568	55.21	39.472	41.444	83.931	77.404	61.376	58.808	31.173	49.336	43.943	58.156	40.465	63.729
35	ATP-dependent RNA helicase DED1 OS=Saccharomyces cerevisiae (strain ATCC 204508 / S288c) OX=559292 GN=DED1 PE=1 SV=2	P06634	66	83.943	132.17	69.075	61.726	21.822	24.667	19.382	18.903	42.997	39.815	35.871	102.54	112.54	91.384
36	Transposon Ty1-PL Gag-Pol polyprotein OS=Saccharomyces cerevisiae (strain ATCC 204508 / S288c) OX=559292 GN=TY1B-PL PE=3 SV=1	Q12414	199	70.938	110.42	93.197	58.198	0	29.771	27.458	28.004	40.847	53.663	51.117	0	96.104	69.741
37	Eukaryotic translation initiation factor 3 subunit A OS=Saccharomyces cerevisiae (strain ATCC 204508 / S288c) OX=559292 GN=RPG1 PE=1 SV=1	P38249	110	31.922	41.826	24.121	25.572	47.841	51.035	54.108	41.306	128.99	82.226	75.33	29.078	44.258	20.441
38	Enolase 2 OS=Saccharomyces cerevisiae (strain ATCC 204508 / S288c) OX=559292 GN=ENO2 PE=1 SV=2	P00925	47	61.479	165.63	81.136	54.671	23.501	19.564	18.574	19.603	26.873	38.949	42.149	125.49	96.104	75.753
39	Transposon Ty1-PR1 Gag-Pol polyprotein OS=Saccharomyces cerevisiae (strain ATCC 204508 / S288c) OX=559292 GN=TY1B-PR1 PE=3 SV=1	P0C2I9	199	0	0	94.293	57.317	0	29.771	0	28.704	41.922	53.663	52.91	67.338	93.575	68.538
40	DNA-directed RNA polymerase I subunit RPA190 OS=Saccharomyces cerevisiae (strain ATCC 204508 / S288c) OX=559292 GN=RPA190 PE=1 SV=2	P10964	186	29.557	16.73	35.086	25.572	39.448	53.587	53.3	50.407	88.143	76.167	74.433	59.686	63.226	45.692
41	Transposon Ty1-JR1 Gag-Pol polyprotein OS=Saccharomyces cerevisiae (strain ATCC 204508 / S288c) OX=559292 GN=TY1B-JR1 PE=3 SV=3	P47098	199	70.938	103.73	93.197	57.317	0	0	0	26.604	0	0	0	64.277	92.31	70.943
42	Transposon Ty1-JR2 Gag-Pol polyprotein OS=Saccharomyces cerevisiae (strain ATCC 204508 / S288c) OX=559292 GN=TY1B-JR2 PE=3 SV=3	P47100	199	68.573	107.07	94.293	56.435	0	0	0	0	39.772	0	0	62.747	96.104	67.336
43	[NU+] prion formation protein 1 OS=Saccharomyces cerevisiae (strain ATCC 204508 / S288c) OX=559292 GN=NEW1 PE=1 SV=1	Q08972	134	70.938	103.73	38.375	44.09	46.162	64.645	58.954	44.806	35.472	16.445	22.42	94.885	54.375	70.943
44	Transposon Ty1-MR2 Gag-Pol polyprotein OS=Saccharomyces cerevisiae (strain ATCC 204508 / S288c) OX=559292 GN=TY1B-MR2 PE=3 SV=2	Q04670	199	0	0	88.811	54.671	0	0	0	28.004	39.772	49.336	48.427	0	94.839	0
45	Transposon Ty1-LR3 Gag-Pol polyprotein OS=Saccharomyces cerevisiae (strain ATCC 204508 / S288c) OX=559292 GN=TY1B-LR3 PE=3 SV=1	P0C2I6	198	63.844	98.709	87.714	53.79	18.465	26.368	25.843	25.904	37.622	51.067	45.736	61.216	83.459	64.931
46	Phosphoglycerate kinase OS=Saccharomyces cerevisiae (strain ATCC 204508 / S288c) OX=559292 GN=PGK1 PE=1 SV=2	P00560	45	62.662	135.52	75.654	49.381	23.501	16.161	18.574	20.303	27.948	47.605	43.046	113.25	92.31	62.526
47	rRNA biogenesis protein RRP5 OS=Saccharomyces cerevisiae (strain ATCC 204508 / S288c) OX=559292 GN=RRP5 PE=1 SV=1	Q05022	193	27.193	58.556	27.411	11.463	19.304	26.368	48.455	23.803	132.21	106.46	99.543	18.365	25.291	20.441
48	Heat shock protein 104 OS=Saccharomyces cerevisiae (strain ATCC 204508 / S288c) OX=559292 GN=HSP104 PE=1 SV=2	P31539	102	14.188	8.3652	16.446	21.163	83.931	89.312	98.525	65.809	62.345	39.815	34.975	16.834	8.8517	19.239
49	Transposon Ty1-OR Gag-Pol polyprotein OS=Saccharomyces cerevisiae (strain ATCC 204508 / S288c) OX=559292 GN=TY1B-OR PE=3 SV=1	Q92393	199	0	98.709	86.618	52.908	0	0	0	0	0	0	0	0	0	0
50	Pyruvate decarboxylase isozyme 1 OS=Saccharomyces cerevisiae (strain ATCC 204508 / S288c) OX=559292 GN=PDC1 PE=1 SV=7	P06169	61	54.386	105.4	59.207	39.681	36.09	33.173	28.265	24.503	39.772	37.218	35.871	99.477	73.343	56.514
51	Pentafunctional AROM polypeptide OS=Saccharomyces cerevisiae (strain ATCC 204508 / S288c) OX=559292 GN=ARO1 PE=1 SV=1	P08566	175	47.292	16.73	61.4	56.435	73.859	61.243	68.645	72.81	12.899	11.252	19.729	26.017	26.555	32.465
52	Eukaryotic translation initiation factor 2 subunit gamma OS=Saccharomyces cerevisiae (strain ATCC 204508 / S288c) OX=559292 GN=GCD11 PE=1 SV=1	P32481	58	44.927	76.96	55.918	37.035	23.501	28.069	29.073	20.303	58.045	42.411	35.871	87.233	73.343	55.312
53	DNA-directed RNA polymerase II subunit RPB2 OS=Saccharomyces cerevisiae (strain ATCC 204508 / S288c) OX=559292 GN=RPB2 PE=1 SV=2	P08518	139	27.193	18.403	50.436	25.572	68.824	64.645	58.146	49.707	50.521	43.277	43.943	7.652	13.91	20.441
54	ATP-dependent RNA helicase eIF4A OS=Saccharomyces cerevisiae (strain ATCC 204508 / S288c) OX=559292 GN=TIF1 PE=1 SV=3	P10081	45	29.557	31.788	31.797	29.099	69.663	86.76	62.184	54.608	20.423	10.386	12.555	70.399	30.349	62.526
55	T-complex protein 1 subunit delta OS=Saccharomyces cerevisiae (strain ATCC 204508 / S288c) OX=559292 GN=CCT4 PE=1 SV=2	P39078	58	56.75	65.248	44.954	61.726	52.037	47.633	41.187	33.605	24.723	23.37	22.42	61.216	50.581	58.919
56	Transposon Ty1-GR3 Gag-Pol polyprotein OS=Saccharomyces cerevisiae (strain ATCC 204508 / S288c) OX=559292 GN=TY1B-GR3 PE=3 SV=3	Q12316	199	61.479	92.017	86.618	48.499	15.108	22.966	0	24.503	0	42.411	41.252	0	82.194	52.907
57	Elongation factor 1-gamma 2 OS=Saccharomyces cerevisiae (strain ATCC 204508 / S288c) OX=559292 GN=TEF4 PE=1 SV=1	P36008	47	23.646	40.153	15.35	22.045	69.663	73.151	40.379	40.606	84.918	40.68	36.768	13.774	13.91	58.919
58	Glutamate synthase [NADH] OS=Saccharomyces cerevisiae (strain ATCC 204508 / S288c) OX=559292 GN=GLT1 PE=1 SV=2	Q12680	238	23.646	6.6921	40.568	45.853	73.859	69.748	95.295	77.011	15.049	14.714	17.936	21.426	22.761	33.668
59	T-complex protein 1 subunit gamma OS=Saccharomyces cerevisiae (strain ATCC 204508 / S288c) OX=559292 GN=CCT3 PE=1 SV=2	P39077	59	61.479	55.21	41.664	59.962	52.037	49.334	45.225	38.505	23.648	23.37	28.697	61.216	44.258	45.692
60	Coatomer subunit alpha OS=Saccharomyces cerevisiae (strain ATCC 204508 / S288c) OX=559292 GN=COP1 PE=1 SV=2	P53622	136	16.552	5.0191	20.832	24.69	58.752	63.794	67.029	56.008	83.843	45.874	53.807	9.1825	3.7936	6.0121
61	Protein PDC2 OS=Saccharomyces cerevisiae (strain ATCC 204508 / S288c) OX=559292 GN=PDC2 PE=1 SV=2	P32896	104	72.12	117.11	23.025	52.026	15.947	28.92	5.6531	19.603	47.296	45.008	35.871	84.172	70.813	54.109
62	Importin subunit beta-4 OS=Saccharomyces cerevisiae (strain ATCC 204508 / S288c) OX=559292 GN=KAP123 PE=1 SV=1	P40069	123	57.932	48.518	39.472	44.09	49.519	55.288	37.149	33.605	11.824	12.983	15.245	113.25	53.11	48.097
63	T-complex protein 1 subunit theta OS=Saccharomyces cerevisiae (strain ATCC 204508 / S288c) OX=559292 GN=CCT8 PE=1 SV=1	P47079	62	42.563	41.826	46.05	42.326	47.841	45.081	44.417	41.306	31.173	25.966	27.8	48.973	40.465	45.692
64	CTP synthase 1 OS=Saccharomyces cerevisiae (strain ATCC 204508 / S288c) OX=559292 GN=URA7 PE=1 SV=2	P28274	65	63.844	48.518	64.689	44.09	43.644	40.828	34.726	32.204	30.098	29.428	26.904	68.868	40.465	39.68
65	Cystathionine beta-synthase OS=Saccharomyces cerevisiae (strain ATCC 204508 / S288c) OX=559292 GN=CYS4 PE=1 SV=1	P32582	56	37.833	40.153	43.857	29.981	63.788	61.243	64.607	60.908	5.3746	6.9243	13.452	48.973	39.2	37.275
66	S-adenosylmethionine synthase 1 OS=Saccharomyces cerevisiae (strain ATCC 204508 / S288c) OX=559292 GN=SAM1 PE=1 SV=2	P10659	42	48.474	53.537	35.086	42.326	29.376	35.725	31.496	31.504	30.098	32.89	32.284	78.051	59.433	55.312
67	Transcription elongation factor SPT6 OS=Saccharomyces cerevisiae (strain ATCC 204508 / S288c) OX=559292 GN=SPT6 PE=1 SV=1	P23615	168	31.922	20.076	12.061	61.726	49.519	58.691	52.493	42.006	56.97	42.411	43.943	22.956	2.5291	6.0121
68	40S ribosomal protein S1-B OS=Saccharomyces cerevisiae (strain ATCC 204508 / S288c) OX=559292 GN=RPS1B PE=1 SV=3	P23248	29	33.104	40.153	13.157	8.818	15.108	17.862	17.767	11.202	130.06	103.86	112.1	10.713	15.174	12.024
69	Magnesium-activated aldehyde dehydrogenase, cytosolic OS=Saccharomyces cerevisiae (strain ATCC 204508 / S288c) OX=559292 GN=ALD6 PE=1 SV=4	P54115	54	41.38	46.845	43.857	29.099	57.913	42.53	32.303	42.706	33.322	26.832	25.11	48.973	49.317	46.895
70	Isoleucine--tRNA ligase, cytoplasmic OS=Saccharomyces cerevisiae (strain ATCC 204508 / S288c) OX=559292 GN=ILS1 PE=1 SV=1	P09436	123	26.01	20.076	39.472	29.981	55.395	37.426	45.225	44.806	34.397	39.815	49.323	26.017	35.407	31.263
71	Actin OS=Saccharomyces cerevisiae (strain ATCC 204508 / S288c) OX=559292 GN=ACT1 PE=1 SV=1	P60010	42	26.01	45.172	27.411	23.808	72.181	52.737	36.341	57.408	19.348	28.563	29.594	35.199	25.291	42.085
72	40S ribosomal protein S1-A OS=Saccharomyces cerevisiae (strain ATCC 204508 / S288c) OX=559292 GN=RPS1A PE=1 SV=2	P33442	29	34.287	43.499	13.157	9.6997	15.108	17.862	17.767	12.602	121.47	102.13	108.51	12.243	13.91	13.227
73	Eukaryotic translation initiation factor 3 subunit B OS=Saccharomyces cerevisiae (strain ATCC 204508 / S288c) OX=559292 GN=PRT1 PE=1 SV=1	P06103	88	18.917	20.076	20.832	15.872	25.179	27.219	43.609	31.504	121.47	66.647	55.601	16.834	32.878	16.834
74	26S proteasome regulatory subunit 7 homolog OS=Saccharomyces cerevisiae (strain ATCC 204508 / S288c) OX=559292 GN=RPT1 PE=1 SV=1	P33299	52	33.104	16.73	16.446	21.163	42.805	51.886	41.994	37.805	60.195	48.47	51.117	29.078	21.497	25.251
75	Transcription elongation factor SPT5 OS=Saccharomyces cerevisiae (strain ATCC 204508 / S288c) OX=559292 GN=SPT5 PE=1 SV=1	P27692	116	40.198	53.537	61.4	37.035	20.983	28.92	29.881	29.404	65.57	51.932	48.427	18.365	20.232	9.6194
76	FACT complex subunit SPT16 OS=Saccharomyces cerevisiae (strain ATCC 204508 / S288c) OX=559292 GN=SPT16 PE=1 SV=1	P32558	119	37.833	33.461	35.086	29.981	38.608	37.426	47.647	41.306	61.27	44.143	43.046	1.5304	15.174	8.417
77	Histidine biosynthesis trifunctional protein OS=Saccharomyces cerevisiae (strain ATCC 204508 / S288c) OX=559292 GN=HIS4 PE=1 SV=3	P00815	88	15.37	15.057	25.218	22.927	64.627	49.334	55.723	57.408	47.296	27.697	25.11	6.1216	20.232	30.061
78	26S proteasome regulatory subunit RPN2 OS=Saccharomyces cerevisiae (strain ATCC 204508 / S288c) OX=559292 GN=RPN2 PE=1 SV=4	P32565	104	11.823	10.038	17.543	14.991	56.234	49.334	55.723	40.606	47.296	40.68	36.768	18.365	10.116	19.239
79	Glyceraldehyde-3-phosphate dehydrogenase 1 OS=Saccharomyces cerevisiae (strain ATCC 204508 / S288c) OX=559292 GN=TDH1 PE=1 SV=3	P00360	36	37.833	51.864	54.822	32.626	20.143	13.609	8.8834	9.8014	50.521	19.042	25.11	59.686	53.11	48.097
80	Coatomer subunit beta' OS=Saccharomyces cerevisiae (strain ATCC 204508 / S288c) OX=559292 GN=SEC27 PE=1 SV=1	P41811	99	20.099	15.057	20.832	24.69	44.484	48.484	54.108	44.806	67.72	38.949	42.149	15.304	10.116	21.644
81	Heat shock protein SSA4 OS=Saccharomyces cerevisiae (strain ATCC 204508 / S288c) OX=559292 GN=SSA4 PE=1 SV=3	P22202	70	21.281	38.48	27.411	19.399	47.841	51.886	37.149	26.604	25.798	25.101	25.11	32.139	35.407	34.87
82	Transposon Ty1-BL Gag-Pol polyprotein OS=Saccharomyces cerevisiae (strain ATCC 204508 / S288c) OX=559292 GN=TY1B-BL PE=1 SV=1	Q12490	199	46.11	85.325	0	40.563	0	0	0	0	0	0	0	42.851	68.284	42.085
83	60S ribosomal protein L17-A OS=Saccharomyces cerevisiae (strain ATCC 204508 / S288c) OX=559292 GN=RPL17A PE=1 SV=4	P05740	21	61.479	108.75	7.675	5.2908	3.3572	2.5518	5.6531	3.5005	96.742	103	97.75	6.1216	5.0581	15.632
84	Ubiquitin-activating enzyme E1 1 OS=Saccharomyces cerevisiae (strain ATCC 204508 / S288c) OX=559292 GN=UBA1 PE=1 SV=2	P22515	114	16.552	16.73	26.314	20.281	79.735	91.013	50.878	51.807	4.2997	3.4622	3.5871	15.304	16.439	32.465
85	26S proteasome regulatory subunit RPN1 OS=Saccharomyces cerevisiae (strain ATCC 204508 / S288c) OX=559292 GN=RPN1 PE=1 SV=3	P38764	109	13.005	13.384	19.736	20.281	50.359	50.185	46.84	37.105	60.195	33.756	39.459	21.426	12.645	24.049
86	S-adenosylmethionine synthase 2 OS=Saccharomyces cerevisiae (strain ATCC 204508 / S288c) OX=559292 GN=SAM2 PE=1 SV=3	P19358	42	36.651	38.48	31.797	37.035	26.858	33.173	31.496	29.404	21.498	24.235	24.213	61.216	42.994	42.085
87	T-complex protein 1 subunit eta OS=Saccharomyces cerevisiae (strain ATCC 204508 / S288c) OX=559292 GN=CCT7 PE=1 SV=1	P42943	60	41.38	25.096	39.472	31.745	36.93	37.426	41.187	35.705	21.498	26.832	23.316	39.791	30.349	45.692
88	Protein SPA2 OS=Saccharomyces cerevisiae (strain ATCC 204508 / S288c) OX=559292 GN=SPA2 PE=1 SV=1	P23201	163	29.557	16.73	23.025	49.381	26.858	29.771	14.536	27.304	40.847	37.218	26.007	58.156	51.846	33.668
89	Protein transport protein SEC7 OS=Saccharomyces cerevisiae (strain ATCC 204508 / S288c) OX=559292 GN=SEC7 PE=1 SV=2	P11075	227	27.193	20.076	18.639	40.563	31.055	38.277	36.341	28.704	47.296	27.697	25.11	65.808	16.439	19.239
90	60S ribosomal protein L17-B OS=Saccharomyces cerevisiae (strain ATCC 204508 / S288c) OX=559292 GN=RPL17B PE=1 SV=2	P46990	21	59.115	105.4	6.5786	4.409	3.3572	2.5518	5.6531	4.2006	90.293	92.613	87.885	6.1216	5.0581	14.429
91	Glutamine--fructose-6-phosphate aminotransferase [isomerizing] OS=Saccharomyces cerevisiae (strain ATCC 204508 / S288c) OX=559292 GN=GFA1 PE=1 SV=4	P14742	80	29.557	23.423	28.507	18.518	39.448	46.783	34.726	36.405	30.098	20.773	26.904	32.139	27.82	33.668
92	Tubulin beta chain OS=Saccharomyces cerevisiae (strain ATCC 204508 / S288c) OX=559292 GN=TUB2 PE=1 SV=2	P02557	51	43.745	45.172	33.989	31.745	26.858	32.322	17.767	21.003	30.098	28.563	26.904	41.321	37.936	32.465
93	Bifunctional purine biosynthetic protein ADE5,7 OS=Saccharomyces cerevisiae (strain ATCC 204508 / S288c) OX=559292 GN=ADE5,7 PE=1 SV=1	P07244	86	27.193	28.442	42.761	23.808	47.001	28.069	33.111	39.205	24.723	31.159	38.562	21.426	39.2	25.251
94	DNA-directed RNA polymerase I subunit RPA135 OS=Saccharomyces cerevisiae (strain ATCC 204508 / S288c) OX=559292 GN=RPA135 PE=1 SV=1	P22138	136	22.464	8.3652	28.507	19.399	23.501	31.472	30.688	28.004	52.671	47.605	44.839	32.139	42.994	28.858
95	Tubulin alpha-1 chain OS=Saccharomyces cerevisiae (strain ATCC 204508 / S288c) OX=559292 GN=TUB1 PE=1 SV=2	P09733	50	27.193	35.134	30.7	26.454	33.572	29.771	23.42	22.403	31.173	29.428	32.284	50.503	32.878	39.68
96	Glycine--tRNA ligase 1, mitochondrial OS=Saccharomyces cerevisiae (strain ATCC 204508 / S288c) OX=559292 GN=GRS1 PE=1 SV=3	P38088	78	29.557	26.769	32.893	22.045	62.948	42.53	39.572	46.206	6.4495	17.311	12.555	22.956	22.761	26.453
97	40S ribosomal protein S14-B OS=Saccharomyces cerevisiae (strain ATCC 204508 / S288c) OX=559292 GN=RPS14B PE=1 SV=2	P39516	15	44.927	76.96	10.964	18.518	15.108	15.311	12.921	7.001	68.795	58.857	59.188	32.139	29.084	33.668
98	Mitochondrial protein import protein MAS5 OS=Saccharomyces cerevisiae (strain ATCC 204508 / S288c) OX=559292 GN=YDJ1 PE=1 SV=1	P25491	45	18.917	15.057	27.411	16.754	41.966	45.081	35.534	30.104	41.922	42.411	42.149	19.895	13.91	16.834
99	Coatomer subunit gamma OS=Saccharomyces cerevisiae (strain ATCC 204508 / S288c) OX=559292 GN=SEC21 PE=1 SV=2	P32074	105	23.646	11.711	8.7714	25.572	47.001	56.99	47.647	41.306	42.997	29.428	29.594	10.713	3.7936	13.227
100	Transcription initiation factor IIB OS=Saccharomyces cerevisiae (strain ATCC 204508 / S288c) OX=559292 GN=SUA7 PE=1 SV=1	P29055	38	76.849	170.65	69.075	49.381	15.108	21.265	10.499	14.702	0	0	0	26.017	17.703	15.632
101	Urea amidolyase OS=Saccharomyces cerevisiae (strain ATCC 204508 / S288c) OX=559292 GN=DUR1,2 PE=1 SV=2	P32528	202	0	0	10.964	9.6997	72.181	77.404	76.72	82.611	0	0.86554	0.89679	0	0	2.4049
102	ATP synthase subunit alpha, mitochondrial OS=Saccharomyces cerevisiae (strain ATCC 204508 / S288c) OX=559292 GN=ATP1 PE=1 SV=5	P07251	59	47.292	48.518	42.761	37.917	20.983	17.012	20.997	21.703	16.124	17.311	16.142	59.686	50.581	46.895
103	60S ribosomal protein L10 OS=Saccharomyces cerevisiae (strain ATCC 204508 / S288c) OX=559292 GN=RPL10 PE=1 SV=1	P41805	25	22.464	11.711	10.964	10.582	10.072	10.207	10.499	7.7011	83.843	77.899	63.672	9.1825	8.8517	14.429
104	Elongator complex protein 1 OS=Saccharomyces cerevisiae (strain ATCC 204508 / S288c) OX=559292 GN=IKI3 PE=1 SV=1	Q06706	153	8.2761	1.673	9.8679	11.463	39.448	50.185	50.07	42.006	58.045	38.949	28.697	1.5304	5.0581	9.6194
105	Endoplasmic reticulum chaperone BiP OS=Saccharomyces cerevisiae (strain ATCC 204508 / S288c) OX=559292 GN=KAR2 PE=1 SV=1	P16474	74	10.641	11.711	9.8679	9.6997	33.572	34.024	35.534	26.604	66.645	67.512	51.117	6.1216	10.116	9.6194
106	26S proteasome regulatory subunit 6A OS=Saccharomyces cerevisiae (strain ATCC 204508 / S288c) OX=559292 GN=RPT5 PE=1 SV=3	P33297	48	13.005	5.0191	8.7714	11.463	40.287	43.38	41.187	32.204	56.97	39.815	37.665	26.017	15.174	19.239
107	Heat shock protein SSC1, mitochondrial OS=Saccharomyces cerevisiae (strain ATCC 204508 / S288c) OX=559292 GN=SSC1 PE=1 SV=1	P0CS90	71	37.833	43.499	37.279	28.217	28.537	24.667	29.881	32.204	13.974	27.697	22.42	42.851	32.878	28.858
108	Cell division control protein 3 OS=Saccharomyces cerevisiae (strain ATCC 204508 / S288c) OX=559292 GN=CDC3 PE=1 SV=3	P32457	60	18.917	15.057	20.832	26.454	31.055	32.322	33.918	30.104	50.521	35.487	27.8	22.956	22.761	19.239
109	Coatomer subunit beta OS=Saccharomyces cerevisiae (strain ATCC 204508 / S288c) OX=559292 GN=SEC26 PE=1 SV=2	P41810	109	8.2761	3.3461	7.675	12.345	45.323	55.288	47.647	35.705	66.645	35.487	35.871	3.0608	3.7936	8.417
110	Eukaryotic translation initiation factor 3 subunit C OS=Saccharomyces cerevisiae (strain ATCC 204508 / S288c) OX=559292 GN=NIP1 PE=1 SV=2	P32497	93	5.9115	8.3652	10.964	11.463	35.251	35.725	38.764	30.104	78.469	35.487	37.665	12.243	20.232	12.024
111	T-complex protein 1 subunit beta OS=Saccharomyces cerevisiae (strain ATCC 204508 / S288c) OX=559292 GN=CCT2 PE=1 SV=1	P39076	57	27.193	11.711	29.604	25.572	31.055	33.173	31.496	29.404	20.423	21.638	21.523	42.851	20.232	31.263
112	Alcohol dehydrogenase 1 OS=Saccharomyces cerevisiae (strain ATCC 204508 / S288c) OX=559292 GN=ADH1 PE=1 SV=5	P00330	37	33.104	68.595	42.761	22.045	14.268	12.759	9.691	13.302	21.498	23.37	20.626	68.868	54.375	37.275
113	40S ribosomal protein S3 OS=Saccharomyces cerevisiae (strain ATCC 204508 / S288c) OX=559292 GN=RPS3 PE=1 SV=5	P05750	27	26.01	30.115	25.218	19.399	23.501	22.966	25.843	14.002	37.622	42.411	48.427	29.078	27.82	20.441
114	T-complex protein 1 subunit alpha OS=Saccharomyces cerevisiae (strain ATCC 204508 / S288c) OX=559292 GN=TCP1 PE=1 SV=2	P12612	60	29.557	30.115	31.797	35.272	31.055	29.771	25.843	23.803	20.423	14.714	20.626	30.608	29.084	42.085
115	ATP-dependent helicase NAM7 OS=Saccharomyces cerevisiae (strain ATCC 204508 / S288c) OX=559292 GN=NAM7 PE=1 SV=1	P30771	109	50.839	58.556	59.207	35.272	2.5179	7.6553	7.2682	3.5005	8.5993	14.714	12.555	59.686	68.284	39.68
116	3-isopropylmalate dehydratase OS=Saccharomyces cerevisiae (strain ATCC 204508 / S288c) OX=559292 GN=LEU1 PE=1 SV=3	P07264	86	20.099	21.749	31.797	22.927	47.001	40.828	42.802	43.406	0	10.386	10.761	19.895	21.497	18.036
117	Eukaryotic translation initiation factor 2 subunit beta OS=Saccharomyces cerevisiae (strain ATCC 204508 / S288c) OX=559292 GN=SUI3 PE=1 SV=2	P09064	32	30.74	43.499	30.7	26.454	1.6786	6.8047	7.2682	5.6008	46.221	35.487	29.594	39.791	50.581	44.49
118	LAS seventeen-binding protein 3 OS=Saccharomyces cerevisiae (strain ATCC 204508 / S288c) OX=559292 GN=LSB3 PE=1 SV=3	P43603	49	54.386	102.06	13.157	29.981	8.3931	11.058	17.767	11.202	16.124	14.714	13.452	38.26	48.052	39.68
119	Phosphate system positive regulatory protein PHO81 OS=Saccharomyces cerevisiae (strain ATCC 204508 / S288c) OX=559292 GN=PHO81 PE=1 SV=2	P17442	134	31.922	8.3652	39.472	30.863	36.09	38.277	32.303	35.705	13.974	5.1932	6.2775	30.608	10.116	27.656
120	Phosphoribosylformylglycinamidine synthase OS=Saccharomyces cerevisiae (strain ATCC 204508 / S288c) OX=559292 GN=ADE6 PE=1 SV=2	P38972	149	30.74	33.461	42.761	30.863	35.251	15.311	24.227	41.306	4.2997	11.252	15.245	22.956	34.142	27.656
121	Asparagine synthetase [glutamine-hydrolyzing] 2 OS=Saccharomyces cerevisiae (strain ATCC 204508 / S288c) OX=559292 GN=ASN2 PE=1 SV=2	P49090	65	13.005	16.73	20.832	17.636	57.073	52.737	46.84	42.006	0	3.4622	4.4839	13.774	12.645	38.478
122	Ribonucleoside-diphosphate reductase large chain 1 OS=Saccharomyces cerevisiae (strain ATCC 204508 / S288c) OX=559292 GN=RNR1 PE=1 SV=2	P21524	100	39.016	25.096	37.279	28.217	25.179	27.219	22.612	23.103	13.974	6.9243	8.0711	48.973	22.761	27.656
123	Eukaryotic peptide chain release factor subunit 1 OS=Saccharomyces cerevisiae (strain ATCC 204508 / S288c) OX=559292 GN=SUP45 PE=1 SV=2	P12385	49	24.828	13.384	19.736	19.399	12.59	20.414	22.612	17.502	64.495	37.218	30.491	24.487	13.91	13.227
124	Intracellular protein transport protein USO1 OS=Saccharomyces cerevisiae (strain ATCC 204508 / S288c) OX=559292 GN=USO1 PE=1 SV=2	P25386	206	18.917	5.0191	8.7714	38.799	28.537	34.024	47.647	35.705	19.348	24.235	19.729	39.791	3.7936	7.2146
125	26S proteasome regulatory subunit 8 homolog OS=Saccharomyces cerevisiae (strain ATCC 204508 / S288c) OX=559292 GN=RPT6 PE=1 SV=4	Q01939	45	13.005	11.711	15.35	10.582	35.251	37.426	33.111	26.604	34.397	32.025	26.904	13.774	16.439	13.227
126	Protein GCN20 OS=Saccharomyces cerevisiae (strain ATCC 204508 / S288c) OX=559292 GN=GCN20 PE=1 SV=1	P43535	85	3.5469	1.673	10.964	7.9362	25.179	34.874	50.878	42.706	52.671	32.89	38.562	4.5912	5.0581	4.8097
127	Eukaryotic translation initiation factor 2 subunit alpha OS=Saccharomyces cerevisiae (strain ATCC 204508 / S288c) OX=559292 GN=SUI2 PE=1 SV=1	P20459	35	24.828	48.518	25.218	22.927	10.072	16.161	8.8834	9.8014	34.397	24.235	18.833	48.973	44.258	40.882
128	Putative proline--tRNA ligase YHR020W OS=Saccharomyces cerevisiae (strain ATCC 204508 / S288c) OX=559292 GN=YHR020W PE=1 SV=1	P38708	77	33.104	31.788	50.436	26.454	31.894	22.115	33.111	28.004	2.1498	12.983	17.039	15.304	32.878	19.239
129	60S ribosomal protein L4-A OS=Saccharomyces cerevisiae (strain ATCC 204508 / S288c) OX=559292 GN=RPL4A PE=1 SV=4	P10664	39	20.099	0	0	18.518	9.2324	6.8047	8.8834	9.1013	66.645	59.722	61.878	0	0	0
130	Enolase 1 OS=Saccharomyces cerevisiae (strain ATCC 204508 / S288c) OX=559292 GN=ENO1 PE=1 SV=3	P00924	47	37.833	60.229	39.472	27.336	10.911	8.5059	7.2682	7.7011	13.974	21.638	19.729	55.095	42.994	40.882
131	Acetolactate synthase catalytic subunit, mitochondrial OS=Saccharomyces cerevisiae (strain ATCC 204508 / S288c) OX=559292 GN=ILV2 PE=1 SV=1	P07342	75	36.651	28.442	36.182	27.336	22.661	17.012	23.42	17.502	41.922	23.37	23.316	26.017	15.174	15.632
132	Tropomyosin-1 OS=Saccharomyces cerevisiae (strain ATCC 204508 / S288c) OX=559292 GN=TPM1 PE=1 SV=1	P17536	24	5.9115	8.3652	12.061	6.1726	31.894	31.472	33.918	28.704	39.772	56.26	45.736	1.5304	7.5872	6.0121
133	NADP-specific glutamate dehydrogenase 1 OS=Saccharomyces cerevisiae (strain ATCC 204508 / S288c) OX=559292 GN=GDH1 PE=1 SV=2	P07262	50	36.651	43.499	33.989	31.745	29.376	19.564	25.843	28.004	0	6.9243	7.1743	33.669	31.613	31.263
134	40S ribosomal protein S6-B OS=Saccharomyces cerevisiae (strain ATCC 204508 / S288c) OX=559292 GN=RPS6B PE=1 SV=1	P0CX38	27	10.641	10.038	16.446	14.991	8.3931	11.908	16.959	10.501	50.521	59.722	60.085	12.243	12.645	13.227
135	Ribosome-associated complex subunit SSZ1 OS=Saccharomyces cerevisiae (strain ATCC 204508 / S288c) OX=559292 GN=SSZ1 PE=1 SV=2	P38788	58	20.099	23.423	20.832	10.582	10.911	17.012	16.959	15.402	63.42	50.201	35.871	22.956	18.968	16.834
136	26S proteasome subunit RPT4 OS=Saccharomyces cerevisiae (strain ATCC 204508 / S288c) OX=559292 GN=RPT4 PE=1 SV=4	P53549	49	5.9115	5.0191	8.7714	10.582	34.412	34.024	33.111	23.103	46.221	25.101	28.697	18.365	5.0581	15.632
137	T-complex protein 1 subunit epsilon OS=Saccharomyces cerevisiae (strain ATCC 204508 / S288c) OX=559292 GN=CCT5 PE=1 SV=3	P40413	62	18.917	15.057	29.604	23.808	36.09	41.679	35.534	31.504	16.124	12.983	16.142	26.017	8.8517	16.834
138	Actin-binding protein OS=Saccharomyces cerevisiae (strain ATCC 204508 / S288c) OX=559292 GN=ABP1 PE=1 SV=4	P15891	66	15.37	28.442	17.543	15.872	28.537	34.874	22.612	31.504	42.997	36.353	26.007	13.774	6.3226	8.417
139	Elongation factor 1-gamma 1 OS=Saccharomyces cerevisiae (strain ATCC 204508 / S288c) OX=559292 GN=CAM1 PE=1 SV=2	P29547	47	9.4584	13.384	10.964	12.345	36.93	36.575	30.688	22.403	50.521	29.428	21.523	4.5912	2.5291	22.846
140	Heat shock protein SSA3 OS=Saccharomyces cerevisiae (strain ATCC 204508 / S288c) OX=559292 GN=SSA3 PE=1 SV=3	P09435	71	0	0	0	0	0	0	0	19.603	20.423	0	0	0	26.555	27.656
141	Eukaryotic translation initiation factor 5 OS=Saccharomyces cerevisiae (strain ATCC 204508 / S288c) OX=559292 GN=TIF5 PE=1 SV=1	P38431	45	5.9115	11.711	8.7714	5.2908	26.858	32.322	31.496	24.503	74.169	36.353	34.975	0	5.0581	10.822
142	60S ribosomal protein L4-B OS=Saccharomyces cerevisiae (strain ATCC 204508 / S288c) OX=559292 GN=RPL4B PE=1 SV=2	P49626	39	17.734	28.442	17.543	18.518	8.3931	5.9541	8.8834	8.4012	65.57	57.991	59.188	16.834	15.174	12.024
143	Ran GTPase-activating protein 1 OS=Saccharomyces cerevisiae (strain ATCC 204508 / S288c) OX=559292 GN=RNA1 PE=1 SV=2	P11745	46	8.2761	8.3652	10.964	8.818	31.055	33.173	26.65	28.004	42.997	38.949	32.284	12.243	7.5872	16.834
144	Reduced viability upon starvation protein 167 OS=Saccharomyces cerevisiae (strain ATCC 204508 / S288c) OX=559292 GN=RVS167 PE=1 SV=1	P39743	53	40.198	61.902	28.507	38.799	7.5538	9.3565	10.499	10.501	10.749	4.3277	2.6904	67.338	50.581	46.895
145	General negative regulator of transcription subunit 1 OS=Saccharomyces cerevisiae (strain ATCC 204508 / S288c) OX=559292 GN=CDC39 PE=1 SV=3	P25655	240	46.11	23.423	48.243	73.189	9.2324	16.161	9.691	12.602	4.2997	1.7311	4.4839	48.973	18.968	42.085
146	NAD-dependent malic enzyme, mitochondrial OS=Saccharomyces cerevisiae (strain ATCC 204508 / S288c) OX=559292 GN=MAE1 PE=1 SV=1	P36013	74	47.292	41.826	44.954	37.917	30.215	18.713	17.767	14.002	4.2997	6.9243	8.9679	21.426	29.084	24.049
147	Clustered mitochondria protein 1 OS=Saccharomyces cerevisiae (strain ATCC 204508 / S288c) OX=559292 GN=CLU1 PE=1 SV=1	Q03690	145	47.292	38.48	37.279	32.626	2.5179	2.5518	17.767	15.402	1.0749	6.9243	15.245	18.365	70.813	52.907
148	Carbamoyl-phosphate synthase arginine-specific large chain OS=Saccharomyces cerevisiae (strain ATCC 204508 / S288c) OX=559292 GN=CPA2 PE=1 SV=1	P03965	124	16.552	10.038	18.639	15.872	45.323	29.771	33.111	54.608	9.6742	6.0588	8.9679	16.834	10.116	19.239
149	Alanine--tRNA ligase, mitochondrial OS=Saccharomyces cerevisiae (strain ATCC 204508 / S288c) OX=559292 GN=ALA1 PE=1 SV=3	P40825	110	16.552	18.403	30.7	22.927	30.215	26.368	34.726	39.906	4.2997	19.907	17.039	18.365	21.497	16.834
150	EH domain-containing and endocytosis protein 1 OS=Saccharomyces cerevisiae (strain ATCC 204508 / S288c) OX=559292 GN=EDE1 PE=1 SV=2	P34216	151	3.5469	1.673	7.675	13.227	33.572	37.426	22.612	44.106	26.873	41.546	38.562	10.713	0	2.4049
151	Plasma membrane ATPase 1 OS=Saccharomyces cerevisiae (strain ATCC 204508 / S288c) OX=559292 GN=PMA1 PE=1 SV=2	P05030	100	11.823	8.3652	3.2893	7.0544	28.537	23.817	32.303	25.904	41.922	45.874	53.807	7.652	5.0581	6.0121
152	ATP synthase subunit beta, mitochondrial OS=Saccharomyces cerevisiae (strain ATCC 204508 / S288c) OX=559292 GN=ATP2 PE=1 SV=2	P00830	55	33.104	31.788	30.7	32.626	15.108	11.058	10.499	14.702	12.899	22.504	17.936	59.686	39.2	33.668
153	COPII coat assembly protein SEC16 OS=Saccharomyces cerevisiae (strain ATCC 204508 / S288c) OX=559292 GN=SEC16 PE=1 SV=2	P48415	242	24.828	23.423	8.7714	23.808	1.6786	2.5518	10.499	4.2006	74.169	38.084	40.355	6.1216	35.407	38.478
154	Phosphoglycerate mutase 1 OS=Saccharomyces cerevisiae (strain ATCC 204508 / S288c) OX=559292 GN=GPM1 PE=1 SV=3	P00950	28	26.01	50.191	33.989	22.045	11.75	11.908	16.959	13.302	8.5993	28.563	21.523	38.26	39.2	21.644
155	Inositol hexakisphosphate and diphosphoinositol-pentakisphosphate kinase OS=Saccharomyces cerevisiae (strain ATCC 204508 / S288c) OX=559292 GN=VIP1 PE=1 SV=1	Q06685	130	37.833	50.191	50.436	55.553	0	0	1.6152	1.4002	0	0	0	59.686	72.078	52.907
156	DNA replication licensing factor MCM4 OS=Saccharomyces cerevisiae (strain ATCC 204508 / S288c) OX=559292 GN=MCM4 PE=1 SV=2	P30665	105	41.38	30.115	44.954	36.154	21.822	13.609	12.921	20.303	5.3746	12.983	11.658	29.078	29.084	28.858
157	Serine hydroxymethyltransferase, cytosolic OS=Saccharomyces cerevisiae (strain ATCC 204508 / S288c) OX=559292 GN=SHM2 PE=1 SV=2	P37291	52	35.469	36.807	39.472	25.572	12.59	5.1035	8.8834	14.002	2.1498	21.638	24.213	35.199	45.523	28.858
158	Threonine--tRNA ligase, cytoplasmic OS=Saccharomyces cerevisiae (strain ATCC 204508 / S288c) OX=559292 GN=THS1 PE=1 SV=2	P04801	85	22.464	31.788	60.304	24.69	15.108	8.5059	25.035	16.802	7.5244	13.849	9.8647	24.487	21.497	25.251
159	Serine--tRNA ligase, cytoplasmic OS=Saccharomyces cerevisiae (strain ATCC 204508 / S288c) OX=559292 GN=SES1 PE=1 SV=2	P07284	53	21.281	26.769	26.314	20.281	36.09	29.771	33.111	33.605	8.5993	7.7899	12.555	16.834	17.703	20.441
160	Essential nuclear protein 1 OS=Saccharomyces cerevisiae (strain ATCC 204508 / S288c) OX=559292 GN=ENP1 PE=1 SV=1	P38333	55	24.828	16.73	28.507	31.745	16.786	16.161	18.574	9.8014	39.772	35.487	33.181	21.426	5.0581	12.024
161	Ribose-phosphate pyrophosphokinase 1 OS=Saccharomyces cerevisiae (strain ATCC 204508 / S288c) OX=559292 GN=PRS1 PE=1 SV=1	P32895	47	13.005	5.0191	18.639	14.991	22.661	30.621	32.303	19.603	55.896	35.487	29.594	3.0608	1.2645	13.227
162	Pleiotropic ABC efflux transporter of multiple drugs OS=Saccharomyces cerevisiae (strain ATCC 204508 / S288c) OX=559292 GN=PDR5 PE=1 SV=1	P33302	170	28.375	18.403	26.314	22.045	25.179	21.265	31.496	27.304	9.6742	25.101	24.213	3.0608	5.0581	12.024
163	Chitin biosynthesis protein CHS5 OS=Saccharomyces cerevisiae (strain ATCC 204508 / S288c) OX=559292 GN=CHS5 PE=1 SV=1	Q12114	74	43.745	55.21	31.797	29.099	6.7145	11.058	18.574	12.602	2.1498	2.5966	0.89679	45.912	56.904	33.668
164	Aspartate--tRNA ligase, cytoplasmic OS=Saccharomyces cerevisiae (strain ATCC 204508 / S288c) OX=559292 GN=DPS1 PE=1 SV=3	P04802	64	34.287	41.826	40.568	26.454	6.7145	5.1035	4.0379	9.1013	0	25.966	33.181	45.912	41.729	31.263
165	26S proteasome regulatory subunit 4 homolog OS=Saccharomyces cerevisiae (strain ATCC 204508 / S288c) OX=559292 GN=RPT2 PE=1 SV=3	P40327	49	10.641	6.6921	14.254	10.582	28.537	29.771	26.65	23.103	32.247	26.832	26.904	19.895	3.7936	7.2146
166	UTP--glucose-1-phosphate uridylyltransferase OS=Saccharomyces cerevisiae (strain ATCC 204508 / S288c) OX=559292 GN=UGP1 PE=1 SV=1	P32861	56	4.7292	6.6921	13.157	14.991	43.644	38.277	46.84	45.506	0	2.5966	4.4839	3.0608	7.5872	28.858
167	Protein BMH1 OS=Saccharomyces cerevisiae (strain ATCC 204508 / S288c) OX=559292 GN=BMH1 PE=1 SV=4	P29311	30	18.917	25.096	16.446	15.872	30.215	30.621	29.881	28.004	11.824	11.252	9.8647	29.078	24.026	20.441
168	40S ribosomal protein S4-A OS=Saccharomyces cerevisiae (strain ATCC 204508 / S288c) OX=559292 GN=RPS4A PE=1 SV=1	P0CX35	29	16.552	18.403	13.157	7.0544	12.59	13.609	16.959	9.1013	27.948	45.874	55.601	12.243	13.91	10.822
169	Nucleolar protein 56 OS=Saccharomyces cerevisiae (strain ATCC 204508 / S288c) OX=559292 GN=NOP56 PE=1 SV=1	Q12460	57	26.01	18.403	23.025	21.163	10.072	9.3565	19.382	9.8014	27.948	21.638	18.833	42.851	39.2	39.68
170	Tubulin alpha-3 chain OS=Saccharomyces cerevisiae (strain ATCC 204508 / S288c) OX=559292 GN=TUB3 PE=1 SV=1	P09734	50	23.646	36.807	27.411	26.454	18.465	17.012	14.536	17.502	17.199	14.714	17.936	30.608	21.497	27.656
171	ABC transporter ATP-binding protein ARB1 OS=Saccharomyces cerevisiae (strain ATCC 204508 / S288c) OX=559292 GN=ARB1 PE=1 SV=1	P40024	68	35.469	35.134	32.893	23.808	12.59	10.207	20.19	18.203	13.974	7.7899	9.8647	41.321	36.671	20.441
172	RuvB-like protein 1 OS=Saccharomyces cerevisiae (strain ATCC 204508 / S288c) OX=559292 GN=RVB1 PE=1 SV=1	Q03940	50	27.193	18.403	20.832	19.399	18.465	19.564	22.612	18.903	26.873	21.638	20.626	38.26	20.232	22.846
173	T-complex protein 1 subunit zeta OS=Saccharomyces cerevisiae (strain ATCC 204508 / S288c) OX=559292 GN=CCT6 PE=1 SV=1	P39079	60	31.922	13.384	20.832	21.163	30.215	27.219	20.19	18.203	10.749	11.252	8.9679	19.895	18.968	24.049
174	Valine--tRNA ligase, mitochondrial OS=Saccharomyces cerevisiae (strain ATCC 204508 / S288c) OX=559292 GN=VAS1 PE=1 SV=2	P07806	126	21.281	16.73	32.893	19.399	31.894	14.46	30.688	33.605	3.2247	16.445	11.658	15.304	22.761	21.644
175	Eukaryotic translation initiation factor 3 subunit J OS=Saccharomyces cerevisiae (strain ATCC 204508 / S288c) OX=559292 GN=HCR1 PE=1 SV=1	Q05775	30	7.0938	6.6921	7.675	2.6454	23.501	26.368	29.881	15.402	53.746	39.815	36.768	3.0608	7.5872	7.2146
176	Asparagine synthetase [glutamine-hydrolyzing] 1 OS=Saccharomyces cerevisiae (strain ATCC 204508 / S288c) OX=559292 GN=ASN1 PE=1 SV=2	P49089	64	13.005	18.403	17.543	14.991	45.323	38.277	32.303	32.204	0	2.5966	5.3807	9.1825	13.91	30.061
177	Glucose-6-phosphate isomerase OS=Saccharomyces cerevisiae (strain ATCC 204508 / S288c) OX=559292 GN=PGI1 PE=1 SV=3	P12709	61	33.104	45.172	36.182	27.336	13.429	5.9541	5.6531	7.7011	5.3746	11.252	11.658	47.443	44.258	33.668
178	Exocyst complex component SEC3 OS=Saccharomyces cerevisiae (strain ATCC 204508 / S288c) OX=559292 GN=SEC3 PE=1 SV=1	P33332	155	33.104	13.384	17.543	34.39	16.786	19.564	20.19	22.403	11.824	10.386	12.555	21.426	8.8517	27.656
179	Protein SLA2 OS=Saccharomyces cerevisiae (strain ATCC 204508 / S288c) OX=559292 GN=SLA2 PE=1 SV=5	P33338	109	14.188	6.6921	19.736	16.754	17.626	24.667	28.265	25.203	33.322	21.638	23.316	18.365	7.5872	14.429
180	Asparagine--tRNA ligase, cytoplasmic OS=Saccharomyces cerevisiae (strain ATCC 204508 / S288c) OX=559292 GN=DED81 PE=1 SV=1	P38707	62	17.734	20.076	21.929	14.991	26.858	20.414	28.265	30.104	19.348	8.6554	10.761	16.834	17.703	19.239
181	Lysine--tRNA ligase, cytoplasmic OS=Saccharomyces cerevisiae (strain ATCC 204508 / S288c) OX=559292 GN=KRS1 PE=1 SV=2	P15180	68	20.099	18.403	24.121	10.582	35.251	39.978	22.612	21.703	7.5244	8.6554	8.9679	19.895	18.968	15.632
182	Eukaryotic translation initiation factor 5B OS=Saccharomyces cerevisiae (strain ATCC 204508 / S288c) OX=559292 GN=FUN12 PE=1 SV=2	P39730	112	7.0938	10.038	13.157	12.345	0.83931	11.058	14.536	6.3009	84.918	46.739	34.975	3.0608	21.497	15.632
183	AP-1 complex subunit beta-1 OS=Saccharomyces cerevisiae (strain ATCC 204508 / S288c) OX=559292 GN=APL2 PE=1 SV=1	P36000	82	43.745	45.172	42.761	17.636	11.75	11.908	20.19	11.902	1.0749	3.4622	2.6904	22.956	46.787	25.251
184	Leucine--tRNA ligase, cytoplasmic OS=Saccharomyces cerevisiae (strain ATCC 204508 / S288c) OX=559292 GN=CDC60 PE=1 SV=1	P26637	124	22.464	30.115	29.604	21.163	26.858	2.5518	23.42	30.104	0	6.9243	8.0711	26.017	24.026	27.656
185	Phosphomannomutase OS=Saccharomyces cerevisiae (strain ATCC 204508 / S288c) OX=559292 GN=SEC53 PE=1 SV=1	P07283	29	23.646	31.788	14.254	8.818	15.108	3.4024	12.114	9.1013	36.547	34.622	42.149	13.774	13.91	16.834
186	Aconitate hydratase, mitochondrial OS=Saccharomyces cerevisiae (strain ATCC 204508 / S288c) OX=559292 GN=ACO1 PE=1 SV=2	P19414	85	43.745	33.461	27.411	28.217	27.697	26.368	4.0379	11.202	7.5244	11.252	13.452	24.487	11.381	21.644
187	C-1-tetrahydrofolate synthase, cytoplasmic OS=Saccharomyces cerevisiae (strain ATCC 204508 / S288c) OX=559292 GN=ADE3 PE=1 SV=1	P07245	102	29.557	35.134	42.761	34.39	5.0359	3.4024	4.0379	10.501	2.1498	8.6554	9.8647	36.73	45.523	32.465
188	ATP-dependent rRNA helicase RRP3 OS=Saccharomyces cerevisiae (strain ATCC 204508 / S288c) OX=559292 GN=RRP3 PE=1 SV=2	P38712	56	35.469	45.172	30.7	31.745	0.83931	5.1035	3.2303	4.2006	17.199	7.7899	5.3807	45.912	39.2	48.097
189	Heat shock protein STI1 OS=Saccharomyces cerevisiae (strain ATCC 204508 / S288c) OX=559292 GN=STI1 PE=1 SV=1	P15705	66	13.005	16.73	27.411	18.518	44.484	34.024	31.496	29.404	5.3746	4.3277	6.2775	7.652	5.0581	6.0121
190	Peroxiredoxin TSA1 OS=Saccharomyces cerevisiae (strain ATCC 204508 / S288c) OX=559292 GN=TSA1 PE=1 SV=3	P34760	22	14.188	18.403	17.543	14.991	40.287	27.219	22.612	30.804	2.1498	2.5966	6.2775	21.426	16.439	28.858
191	Mannose-1-phosphate guanyltransferase OS=Saccharomyces cerevisiae (strain ATCC 204508 / S288c) OX=559292 GN=PSA1 PE=1 SV=2	P41940	40	20.099	30.115	20.832	13.227	14.268	7.6553	16.152	14.002	22.573	22.504	19.729	39.791	29.084	20.441
192	Myosin-2 OS=Saccharomyces cerevisiae (strain ATCC 204508 / S288c) OX=559292 GN=MYO2 PE=1 SV=1	P19524	181	5.9115	8.3652	13.157	7.9362	31.055	20.414	33.111	11.202	15.049	31.159	25.11	15.304	12.645	16.834
193	Trehalose synthase complex regulatory subunit TPS3 OS=Saccharomyces cerevisiae (strain ATCC 204508 / S288c) OX=559292 GN=TPS3 PE=1 SV=3	P38426	119	1.1823	0	5.4822	4.409	39.448	44.231	35.534	33.605	20.423	13.849	13.452	0	0	3.6073
194	Protein APA1 OS=Saccharomyces cerevisiae (strain ATCC 204508 / S288c) OX=559292 GN=APA1 PE=1 SV=4	P16550	36	18.917	10.038	16.446	13.227	17.626	22.966	20.997	18.203	16.124	19.042	19.729	27.547	18.968	15.632
195	Protein BMH2 OS=Saccharomyces cerevisiae (strain ATCC 204508 / S288c) OX=559292 GN=BMH2 PE=1 SV=3	P34730	31	18.917	26.769	16.446	14.991	23.501	22.966	22.612	22.403	6.4495	8.6554	9.8647	27.547	26.555	20.441
196	Eukaryotic translation initiation factor 3 subunit I OS=Saccharomyces cerevisiae (strain ATCC 204508 / S288c) OX=559292 GN=TIF34 PE=1 SV=1	P40217	39	13.005	23.423	8.7714	10.582	10.911	22.115	23.42	16.102	42.997	22.504	26.007	10.713	12.645	13.227
197	Protein transport protein SEC23 OS=Saccharomyces cerevisiae (strain ATCC 204508 / S288c) OX=559292 GN=SEC23 PE=1 SV=1	P15303	85	3.5469	5.0191	16.446	7.0544	23.501	28.069	32.303	23.103	46.221	25.101	30.491	3.0608	1.2645	8.417
198	Signal recognition particle subunit SRP54 OS=Saccharomyces cerevisiae (strain ATCC 204508 / S288c) OX=559292 GN=SRP54 PE=1 SV=2	P20424	60	35.469	30.115	8.7714	37.035	8.3931	6.8047	11.306	12.602	2.1498	28.563	26.904	13.774	17.703	15.632
199	ATP-dependent RNA helicase DBP2 OS=Saccharomyces cerevisiae (strain ATCC 204508 / S288c) OX=559292 GN=DBP2 PE=1 SV=1	P24783	61	15.37	23.423	7.675	5.2908	0.83931	0.85059	0.80758	1.4002	67.72	53.663	56.498	7.652	11.381	19.239
200	Hexokinase-2 OS=Saccharomyces cerevisiae (strain ATCC 204508 / S288c) OX=559292 GN=HXK2 PE=1 SV=4	P04807	54	26.01	38.48	32.893	23.808	14.268	5.1035	8.0758	18.203	2.1498	9.5209	6.2775	32.139	31.613	31.263
201	26S proteasome regulatory subunit RPN9 OS=Saccharomyces cerevisiae (strain ATCC 204508 / S288c) OX=559292 GN=RPN9 PE=1 SV=1	Q04062	46	2.3646	1.673	5.4822	7.0544	38.608	38.277	39.572	26.604	19.348	14.714	18.833	4.5912	2.5291	6.0121
202	Protein transport protein SEC31 OS=Saccharomyces cerevisiae (strain ATCC 204508 / S288c) OX=559292 GN=SEC31 PE=1 SV=3	P38968	139	4.7292	5.0191	13.157	14.109	37.769	39.127	35.534	37.805	7.5244	5.1932	4.4839	12.243	2.5291	7.2146
203	ATP-dependent RNA helicase SUB2 OS=Saccharomyces cerevisiae (strain ATCC 204508 / S288c) OX=559292 GN=SUB2 PE=1 SV=1	Q07478	50	11.823	8.3652	13.157	11.463	30.215	31.472	29.881	25.904	11.824	6.0588	5.3807	41.321	8.8517	15.632
204	Phenylalanine--tRNA ligase alpha subunit OS=Saccharomyces cerevisiae (strain ATCC 204508 / S288c) OX=559292 GN=FRS2 PE=1 SV=3	P15625	58	13.005	8.3652	19.736	12.345	42.805	24.667	28.265	31.504	0	4.3277	3.5871	10.713	15.174	10.822
205	Acetyl-coenzyme A synthetase 2 OS=Saccharomyces cerevisiae (strain ATCC 204508 / S288c) OX=559292 GN=ACS2 PE=1 SV=1	P52910	75	23.646	18.403	26.314	20.281	24.34	23.817	38.764	27.304	0	2.5966	2.6904	16.834	12.645	9.6194
206	26S proteasome regulatory subunit 6B homolog OS=Saccharomyces cerevisiae (strain ATCC 204508 / S288c) OX=559292 GN=RPT3 PE=1 SV=2	P33298	48	9.4584	8.3652	10.964	9.6997	22.661	26.368	24.227	21.003	32.247	20.773	22.42	10.713	1.2645	16.834
207	Glutamate--tRNA ligase, cytoplasmic OS=Saccharomyces cerevisiae (strain ATCC 204508 / S288c) OX=559292 GN=GUS1 PE=1 SV=3	P46655	81	17.734	25.096	32.893	19.399	22.661	10.207	19.382	20.303	0	7.7899	8.0711	21.426	26.555	21.644
208	DNA-directed RNA polymerase I subunit RPA49 OS=Saccharomyces cerevisiae (strain ATCC 204508 / S288c) OX=559292 GN=RPA49 PE=1 SV=2	Q01080	47	14.188	16.73	23.025	17.636	4.1966	8.5059	10.499	11.902	27.948	20.773	20.626	16.834	36.671	20.441
209	Sulfite reductase [NADPH] subunit beta OS=Saccharomyces cerevisiae (strain ATCC 204508 / S288c) OX=559292 GN=MET5 PE=1 SV=1	P47169	161	1.1823	0	26.314	1.7636	35.251	39.978	40.379	45.506	2.1498	0.86554	1.7936	1.5304	1.2645	0
210	5'-3' exoribonuclease 1 OS=Saccharomyces cerevisiae (strain ATCC 204508 / S288c) OX=559292 GN=XRN1 PE=1 SV=1	P22147	175	20.099	10.038	30.7	15.872	31.055	28.069	46.84	27.304	0	0.86554	1.7936	6.1216	7.5872	8.417
211	Inosine-5'-monophosphate dehydrogenase 3 OS=Saccharomyces cerevisiae (strain ATCC 204508 / S288c) OX=559292 GN=IMD3 PE=1 SV=1	P50095	57	31.922	45.172	33.989	24.69	2.5179	0.85059	2.4227	4.9007	1.0749	8.6554	13.452	59.686	42.994	32.465
212	DNA-directed RNA polymerase III subunit RPC1 OS=Saccharomyces cerevisiae (strain ATCC 204508 / S288c) OX=559292 GN=RPO31 PE=1 SV=1	P04051	162	0	0	10.964	0.8818	20.983	18.713	31.496	22.403	41.922	32.89	35.871	0	0	1.2024
213	Structural maintenance of chromosomes protein 3 OS=Saccharomyces cerevisiae (strain ATCC 204508 / S288c) OX=559292 GN=SMC3 PE=1 SV=1	P47037	141	22.464	20.076	18.639	16.754	19.304	20.414	29.881	20.303	17.199	15.58	12.555	7.652	6.3226	4.8097
214	Ribonucleoside-diphosphate reductase small chain 2 OS=Saccharomyces cerevisiae (strain ATCC 204508 / S288c) OX=559292 GN=RNR4 PE=1 SV=1	P49723	40	9.4584	13.384	12.061	10.582	31.055	27.219	33.111	24.503	0	2.5966	3.5871	13.774	11.381	13.227
215	Phenylalanine--tRNA ligase beta subunit OS=Saccharomyces cerevisiae (strain ATCC 204508 / S288c) OX=559292 GN=FRS1 PE=1 SV=3	P15624	67	3.5469	11.711	20.832	8.818	46.162	23.817	29.881	31.504	0	2.5966	3.5871	12.243	8.8517	13.227
216	Tryptophan synthase OS=Saccharomyces cerevisiae (strain ATCC 204508 / S288c) OX=559292 GN=TRP5 PE=1 SV=1	P00931	77	22.464	23.423	32.893	26.454	10.072	2.5518	14.536	18.203	0	0.86554	0.89679	65.808	22.761	21.644
217	Cell division control protein 12 OS=Saccharomyces cerevisiae (strain ATCC 204508 / S288c) OX=559292 GN=CDC12 PE=1 SV=1	P32468	47	0	0	2.1929	2.6454	26.019	29.771	28.265	19.603	44.072	30.294	32.284	0	15.174	0
218	RNA polymerase-associated protein CTR9 OS=Saccharomyces cerevisiae (strain ATCC 204508 / S288c) OX=559292 GN=CTR9 PE=1 SV=3	P89105	125	9.4584	5.0191	19.736	8.818	21.822	28.92	26.65	19.603	35.472	16.445	17.936	4.5912	0	2.4049
219	V-type proton ATPase subunit H OS=Saccharomyces cerevisiae (strain ATCC 204508 / S288c) OX=559292 GN=VMA13 PE=1 SV=1	P41807	54	9.4584	8.3652	14.254	8.818	38.608	44.231	27.458	26.604	8.5993	8.6554	8.0711	12.243	6.3226	4.8097
220	Long-chain-fatty-acid--CoA ligase 4 OS=Saccharomyces cerevisiae (strain ATCC 204508 / S288c) OX=559292 GN=FAA4 PE=1 SV=1	P47912	77	16.552	8.3652	17.543	17.636	17.626	17.012	14.536	14.002	12.899	14.714	16.142	24.487	13.91	19.239
221	26S proteasome regulatory subunit RPN7 OS=Saccharomyces cerevisiae (strain ATCC 204508 / S288c) OX=559292 GN=RPN7 PE=1 SV=3	Q06103	49	22.464	8.3652	6.5786	12.345	25.179	30.621	28.265	22.403	11.824	9.5209	9.8647	22.956	11.381	20.441
222	Replication factor C subunit 2 OS=Saccharomyces cerevisiae (strain ATCC 204508 / S288c) OX=559292 GN=RFC2 PE=1 SV=1	P40348	40	30.74	48.518	29.604	26.454	9.2324	7.6553	7.2682	6.3009	6.4495	9.5209	8.0711	22.956	40.465	26.453
223	DNA-directed RNA polymerases I and III subunit RPAC1 OS=Saccharomyces cerevisiae (strain ATCC 204508 / S288c) OX=559292 GN=RPC40 PE=1 SV=1	P07703	38	16.552	11.711	13.157	9.6997	14.268	20.414	20.19	13.302	24.723	25.966	21.523	19.895	17.703	12.024
224	Sphingolipid long chain base-responsive protein PIL1 OS=Saccharomyces cerevisiae (strain ATCC 204508 / S288c) OX=559292 GN=PIL1 PE=1 SV=1	P53252	38	14.188	8.3652	12.061	9.6997	19.304	22.966	17.767	17.502	30.098	30.294	26.904	1.5304	8.8517	14.429
225	Protein GVP36 OS=Saccharomyces cerevisiae (strain ATCC 204508 / S288c) OX=559292 GN=GVP36 PE=1 SV=1	P40531	37	13.005	11.711	3.2893	14.109	36.09	41.679	24.227	27.304	5.3746	5.1932	3.5871	12.243	5.0581	16.834
226	Protein disulfide-isomerase OS=Saccharomyces cerevisiae (strain ATCC 204508 / S288c) OX=559292 GN=PDI1 PE=1 SV=2	P17967	58	4.7292	3.3461	17.543	8.818	29.376	25.518	33.111	26.604	19.348	23.37	16.142	4.5912	6.3226	9.6194
227	Proteasome subunit alpha type-1 OS=Saccharomyces cerevisiae (strain ATCC 204508 / S288c) OX=559292 GN=SCL1 PE=1 SV=1	P21243	28	4.7292	0	6.5786	7.9362	27.697	29.771	25.843	18.203	32.247	30.294	28.697	3.0608	2.5291	7.2146
228	V-type proton ATPase subunit D OS=Saccharomyces cerevisiae (strain ATCC 204508 / S288c) OX=559292 GN=VMA8 PE=1 SV=1	P32610	29	13.005	18.403	12.061	10.582	19.304	17.862	14.536	16.802	13.974	9.5209	7.1743	27.547	10.116	21.644
229	Triosephosphate isomerase OS=Saccharomyces cerevisiae (strain ATCC 204508 / S288c) OX=559292 GN=TPI1 PE=1 SV=2	P00942	27	22.464	55.21	29.604	21.163	5.8752	1.7012	2.4227	4.9007	4.2997	14.714	12.555	45.912	37.936	30.061
230	Myosin tail region-interacting protein MTI1 OS=Saccharomyces cerevisiae (strain ATCC 204508 / S288c) OX=559292 GN=BBC1 PE=1 SV=2	P47068	128	4.7292	1.673	42.761	7.0544	34.412	34.024	5.6531	28.704	17.199	19.042	14.349	7.652	1.2645	2.4049
231	26S proteasome regulatory subunit RPN5 OS=Saccharomyces cerevisiae (strain ATCC 204508 / S288c) OX=559292 GN=RPN5 PE=1 SV=3	Q12250	52	7.0938	3.3461	5.4822	7.0544	33.572	31.472	27.458	23.803	15.049	16.445	14.349	12.243	3.7936	7.2146
232	Vacuolar protein sorting-associated protein 1 OS=Saccharomyces cerevisiae (strain ATCC 204508 / S288c) OX=559292 GN=VPS1 PE=1 SV=2	P21576	79	22.464	13.384	19.736	22.045	12.59	7.6553	12.921	14.702	1.0749	12.983	16.142	50.503	20.232	31.263
233	Eukaryotic translation initiation factor 1A OS=Saccharomyces cerevisiae (strain ATCC 204508 / S288c) OX=559292 GN=TIF11 PE=1 SV=1	P38912	17	15.37	20.076	1.0964	2.6454	14.268	20.414	20.19	16.102	47.296	32.89	24.213	0	2.5291	12.024
234	Proteasome subunit alpha type-6 OS=Saccharomyces cerevisiae (strain ATCC 204508 / S288c) OX=559292 GN=PRE5 PE=1 SV=1	P40302	26	18.917	13.384	16.446	14.109	15.947	19.564	18.574	15.402	23.648	17.311	18.833	15.304	12.645	9.6194
235	Transposon Ty2-C Gag-Pol polyprotein OS=Saccharomyces cerevisiae (strain ATCC 204508 / S288c) OX=559292 GN=TY2B-C PE=3 SV=2	P25384	202	24.828	33.461	25.218	22.045	6.7145	0	9.691	7.7011	0	9.5209	13.452	22.956	24.026	22.846
236	Nuclear GTP-binding protein NUG1 OS=Saccharomyces cerevisiae (strain ATCC 204508 / S288c) OX=559292 GN=NUG1 PE=1 SV=1	P40010	58	10.641	8.3652	12.061	18.518	4.1966	4.253	8.8834	5.6008	39.772	46.739	41.252	12.243	7.5872	13.227
237	Dynamin-related protein DNM1 OS=Saccharomyces cerevisiae (strain ATCC 204508 / S288c) OX=559292 GN=DNM1 PE=1 SV=1	P54861	85	26.01	10.038	12.061	23.808	20.983	18.713	20.19	17.502	4.2997	12.118	10.761	33.669	12.645	19.239
238	Alanine/arginine aminopeptidase OS=Saccharomyces cerevisiae (strain ATCC 204508 / S288c) OX=559292 GN=AAP1 PE=1 SV=2	P37898	98	14.188	10.038	21.929	15.872	22.661	14.46	26.65	27.304	23.648	4.3277	11.658	4.5912	16.439	6.0121
239	Ribonucleoside-diphosphate reductase small chain 1 OS=Saccharomyces cerevisiae (strain ATCC 204508 / S288c) OX=559292 GN=RNR2 PE=1 SV=2	P09938	46	3.5469	3.3461	7.675	9.6997	31.055	29.771	33.111	22.403	16.124	5.1932	5.3807	6.1216	2.5291	8.417
240	40S ribosomal protein S9-B OS=Saccharomyces cerevisiae (strain ATCC 204508 / S288c) OX=559292 GN=RPS9B PE=1 SV=4	P05755	22	11.823	11.711	7.675	7.0544	8.3931	10.207	15.344	9.1013	23.648	38.084	45.736	4.5912	7.5872	6.0121
241	Isocitrate dehydrogenase [NAD] subunit 1, mitochondrial OS=Saccharomyces cerevisiae (strain ATCC 204508 / S288c) OX=559292 GN=IDH1 PE=1 SV=2	P28834	39	30.74	33.461	15.35	22.927	15.947	10.207	15.344	11.202	5.3746	12.983	13.452	18.365	22.761	19.239
242	Protein BNI1 OS=Saccharomyces cerevisiae (strain ATCC 204508 / S288c) OX=559292 GN=BNI1 PE=1 SV=3	P41832	220	10.641	1.673	13.157	76.716	7.5538	17.012	3.2303	11.902	4.2997	9.5209	6.2775	3.0608	10.116	27.656
243	Amidophosphoribosyltransferase OS=Saccharomyces cerevisiae (strain ATCC 204508 / S288c) OX=559292 GN=ADE4 PE=1 SV=2	P04046	57	5.9115	3.3461	6.5786	6.1726	37.769	39.127	41.994	29.404	1.0749	3.4622	4.4839	0	5.0581	6.0121
244	Proteasome subunit alpha type-5 OS=Saccharomyces cerevisiae (strain ATCC 204508 / S288c) OX=559292 GN=PUP2 PE=1 SV=2	P32379	29	8.2761	8.3652	6.5786	8.818	20.983	20.414	19.382	16.802	27.948	30.294	27.8	4.5912	3.7936	8.417
245	Ribosome quality control complex subunit 2 OS=Saccharomyces cerevisiae (strain ATCC 204508 / S288c) OX=559292 GN=RQC2 PE=1 SV=1	Q12532	119	13.005	6.6921	12.061	15.872	4.1966	10.207	14.536	12.602	38.697	28.563	28.697	13.774	17.703	14.429
246	Transcriptional modulator WTM1 OS=Saccharomyces cerevisiae (strain ATCC 204508 / S288c) OX=559292 GN=WTM1 PE=1 SV=1	Q12363	48	8.2761	8.3652	17.543	15.872	29.376	41.679	35.534	25.203	1.0749	4.3277	5.3807	3.0608	10.116	14.429
247	Nucleolar pre-ribosomal-associated protein 1 OS=Saccharomyces cerevisiae (strain ATCC 204508 / S288c) OX=559292 GN=URB1 PE=1 SV=2	P34241	203	23.646	10.038	31.797	28.217	1.6786	3.4024	0	0	34.397	25.966	27.8	7.652	17.703	15.632
248	Translation initiation factor eIF-2B subunit delta OS=Saccharomyces cerevisiae (strain ATCC 204508 / S288c) OX=559292 GN=GCD2 PE=1 SV=1	P12754	71	9.4584	5.0191	15.35	12.345	17.626	18.713	16.959	16.102	29.023	24.235	20.626	12.243	11.381	12.024
249	Nuclear migration protein NUM1 OS=Saccharomyces cerevisiae (strain ATCC 204508 / S288c) OX=559292 GN=NUM1 PE=1 SV=2	Q00402	313	0	3.3461	8.7714	14.109	9.2324	13.609	20.19	14.002	35.472	44.143	41.252	6.1216	0	4.8097
250	Cell morphogenesis protein PAG1 OS=Saccharomyces cerevisiae (strain ATCC 204508 / S288c) OX=559292 GN=TAO3 PE=1 SV=1	P40468	270	30.74	15.057	3.2893	34.39	0	0	0	0	1.0749	0.86554	0	41.321	45.523	72.146
251	Cell division control protein 10 OS=Saccharomyces cerevisiae (strain ATCC 204508 / S288c) OX=559292 GN=CDC10 PE=1 SV=1	P25342	37	16.552	18.403	14.254	10.582	15.108	13.609	16.959	11.202	30.098	15.58	15.245	16.834	17.703	16.834
252	Translation initiation factor eIF-2B subunit epsilon OS=Saccharomyces cerevisiae (strain ATCC 204508 / S288c) OX=559292 GN=GCD6 PE=1 SV=1	P32501	81	16.552	10.038	10.964	15.872	15.947	16.161	25.843	17.502	24.723	14.714	17.039	19.895	11.381	12.024
253	Lon protease homolog, mitochondrial OS=Saccharomyces cerevisiae (strain ATCC 204508 / S288c) OX=559292 GN=PIM1 PE=1 SV=2	P36775	127	26.01	11.711	21.929	28.217	20.983	21.265	18.574	18.203	1.0749	0	1.7936	24.487	6.3226	19.239
254	60S ribosomal protein L3 OS=Saccharomyces cerevisiae (strain ATCC 204508 / S288c) OX=559292 GN=RPL3 PE=1 SV=4	P14126	44	9.4584	10.038	15.35	5.2908	0	0.85059	2.4227	2.8004	38.697	59.722	57.394	0	7.5872	6.0121
255	Polyadenylate-binding protein, cytoplasmic and nuclear OS=Saccharomyces cerevisiae (strain ATCC 204508 / S288c) OX=559292 GN=PAB1 PE=1 SV=4	P04147	64	22.464	13.384	17.543	17.636	16.786	6.8047	8.8834	14.702	7.5244	13.849	17.936	18.365	26.555	22.846
256	40S ribosomal protein S0-B OS=Saccharomyces cerevisiae (strain ATCC 204508 / S288c) OX=559292 GN=RPS0B PE=1 SV=2	P46654	28	17.734	23.423	16.446	13.227	11.75	11.908	12.921	11.202	18.274	13.849	17.039	26.017	13.91	16.834
257	Elongator complex protein 3 OS=Saccharomyces cerevisiae (strain ATCC 204508 / S288c) OX=559292 GN=ELP3 PE=1 SV=1	Q02908	64	1.1823	1.673	7.675	0.8818	25.179	23.817	29.881	19.603	35.472	21.638	22.42	0	5.0581	3.6073
258	26S proteasome regulatory subunit RPN8 OS=Saccharomyces cerevisiae (strain ATCC 204508 / S288c) OX=559292 GN=RPN8 PE=1 SV=3	Q08723	38	4.7292	0	5.4822	6.1726	27.697	34.024	33.111	18.903	15.049	16.445	18.833	9.1825	0	6.0121
259	Acetolactate synthase small subunit, mitochondrial OS=Saccharomyces cerevisiae (strain ATCC 204508 / S288c) OX=559292 GN=ILV6 PE=1 SV=2	P25605	34	20.099	11.711	13.157	16.754	15.947	12.759	16.959	9.1013	29.023	19.907	17.936	13.774	7.5872	12.024
260	V-type proton ATPase subunit G OS=Saccharomyces cerevisiae (strain ATCC 204508 / S288c) OX=559292 GN=VMA10 PE=1 SV=1	P48836	13	5.9115	13.384	3.2893	7.0544	25.179	28.069	21.805	19.603	15.049	15.58	20.626	0	1.2645	12.024
261	Small glutamine-rich tetratricopeptide repeat-containing protein 2 OS=Saccharomyces cerevisiae (strain ATCC 204508 / S288c) OX=559292 GN=SGT2 PE=1 SV=1	Q12118	37	11.823	11.711	15.35	14.991	31.894	28.92	27.458	30.104	0	2.5966	4.4839	6.1216	5.0581	7.2146
262	RuvB-like protein 2 OS=Saccharomyces cerevisiae (strain ATCC 204508 / S288c) OX=559292 GN=RVB2 PE=1 SV=1	Q12464	52	5.9115	1.673	8.7714	5.2908	16.786	16.161	26.65	18.903	19.348	24.235	21.523	16.834	10.116	10.822
263	Pyruvate carboxylase 2 OS=Saccharomyces cerevisiae (strain ATCC 204508 / S288c) OX=559292 GN=PYC2 PE=1 SV=2	P32327	130	8.2761	3.3461	25.218	14.109	36.09	19.564	29.881	31.504	0	2.5966	3.5871	1.5304	6.3226	3.6073
264	FK506-binding nuclear protein OS=Saccharomyces cerevisiae (strain ATCC 204508 / S288c) OX=559292 GN=FPR3 PE=1 SV=2	P38911	47	15.37	21.749	14.254	13.227	8.3931	9.3565	11.306	8.4012	35.472	29.428	25.11	4.5912	18.968	7.2146
265	Vacuolar protein sorting/targeting protein VPS10 OS=Saccharomyces cerevisiae (strain ATCC 204508 / S288c) OX=559292 GN=PEP1 PE=1 SV=1	P32319	178	0	0	0	0	22.661	22.966	8.8834	20.303	16.124	46.739	43.943	0	0	2.4049
266	Protein BSP1 OS=Saccharomyces cerevisiae (strain ATCC 204508 / S288c) OX=559292 GN=BSP1 PE=1 SV=1	Q06604	65	56.75	85.325	0	39.681	0	0	0	0	0	0	0	24.487	34.142	30.061
267	40S ribosomal protein S8-B OS=Saccharomyces cerevisiae (strain ATCC 204508 / S288c) OX=559292 GN=RPS8B PE=1 SV=1	P0CX40	22	16.552	23.423	4.3857	1.7636	1.6786	3.4024	8.8834	3.5005	26.873	51.067	57.394	6.1216	2.5291	2.4049
268	26S proteasome regulatory subunit RPN3 OS=Saccharomyces cerevisiae (strain ATCC 204508 / S288c) OX=559292 GN=RPN3 PE=1 SV=5	P40016	60	2.3646	0	4.3857	7.0544	30.215	28.069	29.073	23.803	12.899	12.118	9.8647	10.713	2.5291	12.024
269	Protein transport protein SEC24 OS=Saccharomyces cerevisiae (strain ATCC 204508 / S288c) OX=559292 GN=SEC24 PE=1 SV=1	P40482	104	2.3646	0	16.446	4.409	26.858	28.069	32.303	19.603	26.873	12.983	19.729	0	0	1.2024
270	DNA ligase 1 OS=Saccharomyces cerevisiae (strain ATCC 204508 / S288c) OX=559292 GN=CDC9 PE=1 SV=2	P04819	85	50.839	23.423	24.121	38.799	5.8752	7.6553	4.0379	3.5005	0	0	0	19.895	17.703	34.87
271	Eukaryotic translation initiation factor 3 subunit G OS=Saccharomyces cerevisiae (strain ATCC 204508 / S288c) OX=559292 GN=TIF35 PE=1 SV=1	Q04067	31	5.9115	10.038	6.5786	5.2908	10.911	11.908	13.729	11.202	38.697	29.428	30.491	6.1216	11.381	6.0121
272	40S ribosomal protein S2 OS=Saccharomyces cerevisiae (strain ATCC 204508 / S288c) OX=559292 GN=RPS2 PE=1 SV=3	P25443	27	10.641	6.6921	8.7714	6.1726	10.911	7.6553	20.19	9.8014	25.798	32.89	51.117	4.5912	3.7936	1.2024
273	Protein kinase C-like 1 OS=Saccharomyces cerevisiae (strain ATCC 204508 / S288c) OX=559292 GN=PKC1 PE=1 SV=3	P24583	131	29.557	30.115	33.989	22.927	4.1966	3.4024	6.4607	10.501	0	0.86554	0	35.199	39.2	30.061
274	Eukaryotic translation initiation factor 5A-1 OS=Saccharomyces cerevisiae (strain ATCC 204508 / S288c) OX=559292 GN=HYP2 PE=1 SV=3	P23301	17	8.2761	13.384	13.157	7.0544	18.465	19.564	22.612	16.102	39.772	10.386	11.658	10.713	11.381	9.6194
275	Isocitrate dehydrogenase [NAD] subunit 2, mitochondrial OS=Saccharomyces cerevisiae (strain ATCC 204508 / S288c) OX=559292 GN=IDH2 PE=1 SV=1	P28241	40	27.193	26.769	19.736	16.754	9.2324	9.3565	10.499	9.1013	7.5244	8.6554	10.761	35.199	27.82	22.846
276	AP-1 complex subunit gamma-1 OS=Saccharomyces cerevisiae (strain ATCC 204508 / S288c) OX=559292 GN=APL4 PE=1 SV=1	Q12028	94	26.01	36.807	30.7	11.463	10.072	11.058	12.114	8.4012	5.3746	3.4622	4.4839	19.895	40.465	14.429
277	Proteasome subunit alpha type-3 OS=Saccharomyces cerevisiae (strain ATCC 204508 / S288c) OX=559292 GN=PRE9 PE=1 SV=1	P23638	29	8.2761	3.3461	10.964	7.0544	22.661	19.564	16.959	16.102	24.723	18.176	20.626	6.1216	7.5872	16.834
278	Transcriptional regulatory protein SIN3 OS=Saccharomyces cerevisiae (strain ATCC 204508 / S288c) OX=559292 GN=SIN3 PE=1 SV=2	P22579	175	2.3646	1.673	2.1929	16.754	18.465	21.265	12.921	18.203	33.322	25.966	25.11	4.5912	0	3.6073
279	Proteasome activator BLM10 OS=Saccharomyces cerevisiae (strain ATCC 204508 / S288c) OX=559292 GN=BLM10 PE=1 SV=2	P43583	246	0	0	0	0.8818	35.251	34.024	35.534	28.704	13.974	6.0588	12.555	0	0	0
280	Nucleolar protein 58 OS=Saccharomyces cerevisiae (strain ATCC 204508 / S288c) OX=559292 GN=NOP58 PE=1 SV=1	Q12499	57	13.005	10.038	16.446	14.109	10.911	12.759	13.729	11.202	22.573	20.773	22.42	13.774	21.497	13.227
281	Nuclear segregation protein BFR1 OS=Saccharomyces cerevisiae (strain ATCC 204508 / S288c) OX=559292 GN=BFR1 PE=1 SV=1	P38934	55	10.641	18.403	29.604	22.927	0	0	0	0	0	0.86554	0	29.078	79.665	43.287
282	Reduced viability upon starvation protein 161 OS=Saccharomyces cerevisiae (strain ATCC 204508 / S288c) OX=559292 GN=RVS161 PE=1 SV=1	P25343	30	23.646	33.461	20.832	18.518	5.0359	5.9541	4.0379	6.3009	2.1498	2.5966	0.89679	39.791	35.407	30.061
283	N-terminal acetyltransferase A complex subunit NAT1 OS=Saccharomyces cerevisiae (strain ATCC 204508 / S288c) OX=559292 GN=NAT1 PE=1 SV=2	P12945	99	23.646	43.499	42.761	14.991	0	0.85059	2.4227	1.4002	1.0749	2.5966	2.6904	12.243	48.052	43.287
284	Low specificity L-threonine aldolase OS=Saccharomyces cerevisiae (strain ATCC 204508 / S288c) OX=559292 GN=GLY1 PE=1 SV=2	P37303	43	9.4584	11.711	12.061	8.818	27.697	35.725	28.265	21.003	0	0.86554	2.6904	13.774	10.116	19.239
285	Coatomer subunit delta OS=Saccharomyces cerevisiae (strain ATCC 204508 / S288c) OX=559292 GN=RET2 PE=1 SV=3	P43621	61	2.3646	1.673	2.1929	2.6454	25.179	25.518	11.306	17.502	38.697	29.428	25.11	3.0608	2.5291	4.8097
286	Elongator complex protein 2 OS=Saccharomyces cerevisiae (strain ATCC 204508 / S288c) OX=559292 GN=ELP2 PE=1 SV=1	P42935	89	0	0	1.0964	0	24.34	24.667	29.881	30.804	33.322	12.118	16.142	0	0	0
287	Eukaryotic peptide chain release factor GTP-binding subunit OS=Saccharomyces cerevisiae (strain ATCC 204508 / S288c) OX=559292 GN=SUP35 PE=1 SV=1	P05453	77	34.287	36.807	26.314	23.808	7.5538	5.9541	4.8455	4.2006	3.2247	4.3277	4.4839	32.139	26.555	22.846
288	Elongation factor Tu, mitochondrial OS=Saccharomyces cerevisiae (strain ATCC 204508 / S288c) OX=559292 GN=TUF1 PE=1 SV=1	P02992	48	24.828	21.749	21.929	14.991	16.786	17.862	22.612	17.502	5.3746	3.4622	5.3807	21.426	8.8517	15.632
289	Translation initiation factor RLI1 OS=Saccharomyces cerevisiae (strain ATCC 204508 / S288c) OX=559292 GN=RLI1 PE=1 SV=1	Q03195	68	14.188	20.076	27.411	12.345	7.5538	5.9541	6.4607	9.1013	5.3746	5.1932	9.8647	27.547	44.258	30.061
290	40S ribosomal protein S5 OS=Saccharomyces cerevisiae (strain ATCC 204508 / S288c) OX=559292 GN=RPS5 PE=1 SV=3	P26783	25	17.734	20.076	10.964	7.9362	10.072	12.759	13.729	9.8014	13.974	23.37	23.316	13.774	16.439	12.024
291	Replication factor C subunit 3 OS=Saccharomyces cerevisiae (strain ATCC 204508 / S288c) OX=559292 GN=RFC3 PE=1 SV=1	P38629	38	22.464	40.153	24.121	19.399	7.5538	11.058	9.691	8.4012	3.2247	7.7899	7.1743	12.243	37.936	22.846
292	Signal recognition particle subunit SRP68 OS=Saccharomyces cerevisiae (strain ATCC 204508 / S288c) OX=559292 GN=SRP68 PE=1 SV=1	P38687	69	9.4584	1.673	3.2893	14.991	20.983	24.667	25.035	15.402	24.723	27.697	20.626	0	3.7936	3.6073
293	60S ribosomal protein L23-A OS=Saccharomyces cerevisiae (strain ATCC 204508 / S288c) OX=559292 GN=RPL23A PE=1 SV=1	P0CX41	14	9.4584	15.057	10.964	7.9362	6.7145	4.253	4.8455	4.9007	34.397	37.218	41.252	10.713	10.116	9.6194
294	Ribose-phosphate pyrophosphokinase 5 OS=Saccharomyces cerevisiae (strain ATCC 204508 / S288c) OX=559292 GN=PRS5 PE=1 SV=1	Q12265	54	18.917	5.0191	14.254	17.636	10.072	8.5059	23.42	13.302	31.173	7.7899	8.9679	18.365	12.645	14.429
295	60S ribosomal protein L5 OS=Saccharomyces cerevisiae (strain ATCC 204508 / S288c) OX=559292 GN=RPL5 PE=1 SV=4	P26321	34	4.7292	15.057	4.3857	3.5272	5.8752	7.6553	4.8455	4.2006	30.098	38.084	42.149	0	5.0581	6.0121
296	Pyruvate carboxylase 1 OS=Saccharomyces cerevisiae (strain ATCC 204508 / S288c) OX=559292 GN=PYC1 PE=1 SV=2	P11154	130	0	0	0	0	36.09	20.414	25.843	27.304	0	0	0	0	6.3226	0
297	V-type proton ATPase subunit E OS=Saccharomyces cerevisiae (strain ATCC 204508 / S288c) OX=559292 GN=VMA4 PE=1 SV=4	P22203	26	3.5469	10.038	8.7714	9.6997	25.179	28.92	24.227	16.802	10.749	12.983	10.761	7.652	3.7936	14.429
298	AMP deaminase OS=Saccharomyces cerevisiae (strain ATCC 204508 / S288c) OX=559292 GN=AMD1 PE=1 SV=2	P15274	93	2.3646	5.0191	24.121	5.2908	32.733	33.173	17.767	30.804	0	0	0	7.652	11.381	3.6073
299	V-type proton ATPase subunit a, vacuolar isoform OS=Saccharomyces cerevisiae (strain ATCC 204508 / S288c) OX=559292 GN=VPH1 PE=1 SV=3	P32563	96	5.9115	1.673	1.0964	5.2908	17.626	13.609	20.997	19.603	26.873	31.159	29.594	1.5304	1.2645	3.6073
300	Ribosome biogenesis protein MAK21 OS=Saccharomyces cerevisiae (strain ATCC 204508 / S288c) OX=559292 GN=MAK21 PE=1 SV=1	Q12176	117	14.188	0	9.8679	21.163	5.8752	5.9541	12.114	4.2006	30.098	35.487	34.975	3.0608	5.0581	16.834
301	5-methyltetrahydropteroyltriglutamate--homocysteine methyltransferase OS=Saccharomyces cerevisiae (strain ATCC 204508 / S288c) OX=559292 GN=MET6 PE=1 SV=4	P05694	86	20.099	28.442	46.05	29.099	0.83931	1.7012	0.80758	5.6008	0	6.0588	8.0711	27.547	37.936	27.656
302	Deoxyhypusine synthase OS=Saccharomyces cerevisiae (strain ATCC 204508 / S288c) OX=559292 GN=DYS1 PE=1 SV=1	P38791	43	4.7292	5.0191	9.8679	10.582	29.376	33.173	32.303	26.604	0	0.86554	0.89679	4.5912	2.5291	16.834
303	Uncharacterized protein YPR148C OS=Saccharomyces cerevisiae (strain ATCC 204508 / S288c) OX=559292 GN=YPR148C PE=1 SV=1	Q06523	49	5.9115	0	0	1.7636	23.501	26.368	12.921	21.003	30.098	34.622	21.523	0	0	0
304	Synaptobrevin homolog YKT6 OS=Saccharomyces cerevisiae (strain ATCC 204508 / S288c) OX=559292 GN=YKT6 PE=1 SV=1	P36015	23	26.01	26.769	17.543	27.336	9.2324	8.5059	4.0379	7.7011	6.4495	8.6554	8.9679	39.791	17.703	16.834
305	Elongation factor 3B OS=Saccharomyces cerevisiae (strain ATCC 204508 / S288c) OX=559292 GN=HEF3 PE=1 SV=2	P53978	116	7.0938	16.73	14.254	7.0544	19.304	22.966	16.959	13.302	16.124	0	14.349	7.652	11.381	9.6194
306	E3 ubiquitin-protein ligase BRE1 OS=Saccharomyces cerevisiae (strain ATCC 204508 / S288c) OX=559292 GN=BRE1 PE=1 SV=1	Q07457	81	29.557	36.807	14.254	20.281	3.3572	1.7012	5.6531	6.3009	0	0.86554	0.89679	36.73	36.671	28.858
307	ATP-dependent RNA helicase DBP10 OS=Saccharomyces cerevisiae (strain ATCC 204508 / S288c) OX=559292 GN=DBP10 PE=1 SV=2	Q12389	113	0	0	25.218	0	0	0	5.6531	1.4002	53.746	38.084	45.736	0	2.5291	0
308	GPN-loop GTPase 1 OS=Saccharomyces cerevisiae (strain ATCC 204508 / S288c) OX=559292 GN=NPA3 PE=1 SV=1	P47122	43	22.464	15.057	8.7714	19.399	8.3931	4.253	9.691	14.002	7.5244	6.0588	8.0711	18.365	15.174	16.834
309	Protein BOI2 OS=Saccharomyces cerevisiae (strain ATCC 204508 / S288c) OX=559292 GN=BOI2 PE=1 SV=1	P39969	116	33.104	21.749	14.254	36.154	5.0359	6.8047	0	7.7011	1.0749	0.86554	1.7936	26.017	31.613	33.668
310	Serine/threonine-protein phosphatase 2A 56 regulatory subunit delta isoform OS=Saccharomyces cerevisiae (strain ATCC 204508 / S288c) OX=559292 GN=RTS1 PE=1 SV=2	P38903	85	16.552	28.442	8.7714	23.808	5.8752	7.6553	10.499	8.4012	8.5993	9.5209	9.8647	21.426	22.761	18.036
311	GTPase-activating protein BEM2/IPL2 OS=Saccharomyces cerevisiae (strain ATCC 204508 / S288c) OX=559292 GN=BEM2 PE=1 SV=1	P39960	245	20.099	10.038	21.929	33.508	0.83931	4.253	8.0758	2.8004	5.3746	6.9243	4.4839	6.1216	40.465	37.275
312	Serine/threonine-protein kinase GIN4 OS=Saccharomyces cerevisiae (strain ATCC 204508 / S288c) OX=559292 GN=GIN4 PE=1 SV=1	Q12263	130	28.375	10.038	18.639	43.208	1.6786	5.1035	0	4.2006	2.1498	8.6554	6.2775	18.365	22.761	22.846
313	1,3-beta-glucan synthase component FKS1 OS=Saccharomyces cerevisiae (strain ATCC 204508 / S288c) OX=559292 GN=FKS1 PE=1 SV=2	P38631	215	4.7292	0	0	0	8.3931	6.8047	13.729	18.203	15.049	48.47	58.291	0	0	1.2024
314	Methionine--tRNA ligase, cytoplasmic OS=Saccharomyces cerevisiae (strain ATCC 204508 / S288c) OX=559292 GN=MES1 PE=1 SV=4	P00958	86	10.641	6.6921	21.929	12.345	27.697	13.609	25.843	23.803	2.1498	2.5966	3.5871	9.1825	12.645	12.024
315	Heat shock protein homolog SSE2 OS=Saccharomyces cerevisiae (strain ATCC 204508 / S288c) OX=559292 GN=SSE2 PE=1 SV=3	P32590	78	5.9115	0	8.7714	7.9362	22.661	20.414	27.458	22.403	5.3746	6.0588	4.4839	0	6.3226	4.8097
316	Proteasome subunit alpha type-4 OS=Saccharomyces cerevisiae (strain ATCC 204508 / S288c) OX=559292 GN=PRE6 PE=1 SV=1	P40303	28	8.2761	8.3652	7.675	4.409	27.697	22.966	16.152	7.7011	27.948	17.311	18.833	4.5912	5.0581	8.417
317	RNA polymerase II transcriptional coactivator SUB1 OS=Saccharomyces cerevisiae (strain ATCC 204508 / S288c) OX=559292 GN=SUB1 PE=1 SV=1	P54000	33	17.734	18.403	13.157	14.991	5.8752	5.1035	9.691	4.9007	20.423	26.832	21.523	15.304	21.497	14.429
318	40S ribosomal protein S15 OS=Saccharomyces cerevisiae (strain ATCC 204508 / S288c) OX=559292 GN=RPS15 PE=1 SV=1	Q01855	16	17.734	16.73	16.446	7.0544	3.3572	4.253	4.0379	3.5005	18.274	37.218	34.078	13.774	15.174	7.2146
319	Sphingolipid long chain base-responsive protein LSP1 OS=Saccharomyces cerevisiae (strain ATCC 204508 / S288c) OX=559292 GN=LSP1 PE=1 SV=1	Q12230	38	8.2761	6.6921	12.061	5.2908	20.983	19.564	15.344	13.302	24.723	22.504	19.729	6.1216	6.3226	6.0121
320	Bifunctional purine biosynthesis protein ADE17 OS=Saccharomyces cerevisiae (strain ATCC 204508 / S288c) OX=559292 GN=ADE17 PE=1 SV=2	P38009	65	20.099	26.769	38.375	23.808	5.0359	2.5518	3.2303	9.1013	1.0749	8.6554	14.349	10.713	34.142	24.049
321	Proteasome subunit alpha type-2 OS=Saccharomyces cerevisiae (strain ATCC 204508 / S288c) OX=559292 GN=PRE8 PE=1 SV=1	P23639	27	11.823	10.038	5.4822	7.9362	15.108	16.161	15.344	11.202	27.948	19.042	14.349	13.774	13.91	14.429
322	ATP-dependent helicase FUN30 OS=Saccharomyces cerevisiae (strain ATCC 204508 / S288c) OX=559292 GN=FUN30 PE=1 SV=1	P31380	129	16.552	3.3461	17.543	21.163	10.911	13.609	9.691	12.602	25.798	17.311	17.039	12.243	1.2645	4.8097
323	Nucleosome assembly protein OS=Saccharomyces cerevisiae (strain ATCC 204508 / S288c) OX=559292 GN=NAP1 PE=1 SV=2	P25293	48	13.005	3.3461	12.061	12.345	12.59	17.862	12.921	11.902	30.098	19.042	15.245	4.5912	5.0581	12.024
324	Pre-mRNA-splicing factor ATP-dependent RNA helicase PRP43 OS=Saccharomyces cerevisiae (strain ATCC 204508 / S288c) OX=559292 GN=PRP43 PE=1 SV=1	P53131	88	9.4584	5.0191	19.736	7.0544	16.786	17.012	18.574	13.302	12.899	13.849	17.039	3.0608	16.439	7.2146
325	ATP-dependent RNA helicase DBP3 OS=Saccharomyces cerevisiae (strain ATCC 204508 / S288c) OX=559292 GN=DBP3 PE=1 SV=2	P20447	59	15.37	11.711	19.736	14.991	0	0	8.0758	0.7001	1.0749	5.1932	8.0711	48.973	51.846	39.68
326	Zuotin OS=Saccharomyces cerevisiae (strain ATCC 204508 / S288c) OX=559292 GN=ZUO1 PE=1 SV=1	P32527	49	11.823	8.3652	7.675	3.5272	5.0359	8.5059	8.0758	7.001	47.296	33.756	26.007	6.1216	6.3226	3.6073
327	60S ribosomal protein L7-A OS=Saccharomyces cerevisiae (strain ATCC 204508 / S288c) OX=559292 GN=RPL7A PE=1 SV=3	Q12213	28	11.823	15.057	14.254	7.0544	0	1.7012	8.0758	3.5005	22.573	35.487	37.665	9.1825	12.645	9.6194
328	Calcium-transporting ATPase 1 OS=Saccharomyces cerevisiae (strain ATCC 204508 / S288c) OX=559292 GN=PMR1 PE=1 SV=1	P13586	105	1.1823	0	0	0	26.858	24.667	12.114	27.304	17.199	21.638	23.316	0	0	1.2024
329	Protein EMP47 OS=Saccharomyces cerevisiae (strain ATCC 204508 / S288c) OX=559292 GN=EMP47 PE=1 SV=1	P43555	50	0	0	0	0.8818	22.661	21.265	6.4607	21.003	27.948	28.563	33.181	0	0	1.2024
330	60S ribosomal protein L20-B OS=Saccharomyces cerevisiae (strain ATCC 204508 / S288c) OX=559292 GN=RPL20B PE=1 SV=1	P0CX24	20	8.2761	5.0191	9.8679	4.409	3.3572	3.4024	3.2303	2.1003	21.498	41.546	42.149	9.1825	8.8517	8.417
331	Adenylosuccinate lyase OS=Saccharomyces cerevisiae (strain ATCC 204508 / S288c) OX=559292 GN=ADE13 PE=1 SV=1	Q05911	55	14.188	13.384	23.025	10.582	20.983	7.6553	20.19	18.903	1.0749	6.0588	3.5871	9.1825	24.026	15.632
332	Probable ATP-dependent RNA helicase DHR1 OS=Saccharomyces cerevisiae (strain ATCC 204508 / S288c) OX=559292 GN=ECM16 PE=1 SV=1	Q04217	145	9.4584	3.3461	9.8679	10.582	0.83931	5.1035	9.691	2.8004	46.221	35.487	32.284	3.0608	5.0581	3.6073
333	Cell division control protein 53 OS=Saccharomyces cerevisiae (strain ATCC 204508 / S288c) OX=559292 GN=CDC53 PE=1 SV=1	Q12018	94	4.7292	3.3461	6.5786	9.6997	22.661	24.667	27.458	21.703	13.974	6.0588	7.1743	7.652	3.7936	6.0121
334	Ketol-acid reductoisomerase, mitochondrial OS=Saccharomyces cerevisiae (strain ATCC 204508 / S288c) OX=559292 GN=ILV5 PE=1 SV=1	P06168	44	21.281	35.134	24.121	14.991	8.3931	6.8047	3.2303	4.2006	2.1498	9.5209	8.0711	29.078	20.232	19.239
335	Adenylyl cyclase-associated protein OS=Saccharomyces cerevisiae (strain ATCC 204508 / S288c) OX=559292 GN=SRV2 PE=1 SV=1	P17555	58	2.3646	0	2.1929	1.7636	35.251	34.024	19.382	28.704	3.2247	6.0588	8.0711	1.5304	1.2645	7.2146
336	Malate dehydrogenase, peroxisomal OS=Saccharomyces cerevisiae (strain ATCC 204508 / S288c) OX=559292 GN=MDH3 PE=1 SV=3	P32419	37	33.104	36.807	27.411	16.754	0	0	0	0	0	0	0	44.382	50.581	27.656
337	V-type proton ATPase subunit C OS=Saccharomyces cerevisiae (strain ATCC 204508 / S288c) OX=559292 GN=VMA5 PE=1 SV=4	P31412	44	13.005	8.3652	10.964	9.6997	15.108	19.564	4.0379	14.702	10.749	12.118	14.349	24.487	10.116	10.822
338	AP-1 complex subunit mu-1-I OS=Saccharomyces cerevisiae (strain ATCC 204508 / S288c) OX=559292 GN=APM1 PE=1 SV=2	Q00776	54	20.099	35.134	27.411	7.0544	7.5538	7.6553	9.691	7.7011	4.2997	3.4622	1.7936	13.774	31.613	12.024
339	Ubiquitin carboxyl-terminal hydrolase RPN11 OS=Saccharomyces cerevisiae (strain ATCC 204508 / S288c) OX=559292 GN=RPN11 PE=1 SV=1	P43588	34	3.5469	1.673	3.2893	2.6454	18.465	21.265	22.612	19.603	11.824	16.445	14.349	9.1825	3.7936	7.2146
340	Probable proteasome subunit alpha type-7 OS=Saccharomyces cerevisiae (strain ATCC 204508 / S288c) OX=559292 GN=PRE10 PE=1 SV=2	P21242	32	11.823	6.6921	8.7714	8.818	18.465	13.609	13.729	11.202	18.274	19.907	15.245	10.713	6.3226	8.417
341	E3 ubiquitin-protein ligase RSP5 OS=Saccharomyces cerevisiae (strain ATCC 204508 / S288c) OX=559292 GN=RSP5 PE=1 SV=1	P39940	92	20.099	23.423	14.254	11.463	16.786	15.311	8.0758	15.402	2.1498	6.0588	2.6904	10.713	17.703	16.834
342	Multiprotein-bridging factor 1 OS=Saccharomyces cerevisiae (strain ATCC 204508 / S288c) OX=559292 GN=MBF1 PE=1 SV=2	O14467	16	26.01	53.537	15.35	14.109	0	0	0	0	0	0.86554	1.7936	27.547	45.523	37.275
343	Importin subunit alpha OS=Saccharomyces cerevisiae (strain ATCC 204508 / S288c) OX=559292 GN=SRP1 PE=1 SV=1	Q02821	60	3.5469	3.3461	6.5786	5.2908	19.304	17.862	16.152	17.502	17.199	12.118	9.8647	13.774	2.5291	6.0121
344	Protein MON2 OS=Saccharomyces cerevisiae (strain ATCC 204508 / S288c) OX=559292 GN=MON2 PE=1 SV=1	P48563	187	34.287	25.096	4.3857	18.518	9.2324	11.908	12.921	16.802	4.2997	3.4622	5.3807	4.5912	22.761	13.227
345	IML2-like protein YKR018C OS=Saccharomyces cerevisiae (strain ATCC 204508 / S288c) OX=559292 GN=YKR018C PE=1 SV=1	P36114	82	11.823	10.038	1.0964	13.227	22.661	27.219	16.152	24.503	2.1498	1.7311	0.89679	15.304	3.7936	6.0121
346	Protein KRI1 OS=Saccharomyces cerevisiae (strain ATCC 204508 / S288c) OX=559292 GN=KRI1 PE=1 SV=1	P42846	69	1.1823	1.673	6.5786	1.7636	10.072	11.908	12.114	9.8014	46.221	34.622	28.697	0	2.5291	2.4049
347	40S ribosomal protein S17-A OS=Saccharomyces cerevisiae (strain ATCC 204508 / S288c) OX=559292 GN=RPS17A PE=1 SV=1	P02407 (+1)	16	16.552	16.73	5.4822	10.582	5.0359	7.6553	8.0758	3.5005	12.899	26.832	28.697	18.365	21.497	15.632
348	H/ACA ribonucleoprotein complex subunit CBF5 OS=Saccharomyces cerevisiae (strain ATCC 204508 / S288c) OX=559292 GN=CBF5 PE=1 SV=1	P33322	55	2.3646	1.673	1.0964	2.6454	8.3931	12.759	11.306	7.001	37.622	36.353	36.768	1.5304	3.7936	1.2024
349	RNA cytidine acetyltransferase OS=Saccharomyces cerevisiae (strain ATCC 204508 / S288c) OX=559292 GN=KRE33 PE=1 SV=1	P53914	119	0	0	6.5786	6.1726	5.0359	8.5059	18.574	8.4012	25.798	27.697	32.284	3.0608	5.0581	8.417
350	Golgin IMH1 OS=Saccharomyces cerevisiae (strain ATCC 204508 / S288c) OX=559292 GN=IMH1 PE=1 SV=1	Q06704	105	29.557	21.749	18.639	27.336	6.7145	5.1035	10.499	11.202	0	0	0	22.956	15.174	13.227
351	Protein MKT1 OS=Saccharomyces cerevisiae (strain ATCC 204508 / S288c) OX=559292 GN=MKT1 PE=1 SV=2	P40850	94	16.552	8.3652	20.832	12.345	16.786	14.46	15.344	18.903	5.3746	4.3277	8.0711	10.713	8.8517	10.822
352	Pumilio homology domain family member 4 OS=Saccharomyces cerevisiae (strain ATCC 204508 / S288c) OX=559292 GN=PUF4 PE=1 SV=2	P25339	98	34.287	30.115	10.964	34.39	5.0359	4.253	0	4.2006	2.1498	0.86554	0.89679	27.547	21.497	27.656
353	Catabolic L-serine/threonine dehydratase OS=Saccharomyces cerevisiae (strain ATCC 204508 / S288c) OX=559292 GN=CHA1 PE=1 SV=2	P25379	39	17.734	11.711	16.446	13.227	5.0359	1.7012	7.2682	4.2006	3.2247	2.5966	4.4839	42.851	39.2	20.441
354	DNA replication licensing factor MCM6 OS=Saccharomyces cerevisiae (strain ATCC 204508 / S288c) OX=559292 GN=MCM6 PE=1 SV=2	P53091	113	15.37	8.3652	25.218	19.399	19.304	16.161	7.2682	16.102	3.2247	4.3277	7.1743	15.304	2.5291	7.2146
355	UPF0662 protein YPL260W OS=Saccharomyces cerevisiae (strain ATCC 204508 / S288c) OX=559292 GN=YPL260W PE=1 SV=1	Q08977	63	1.1823	1.673	2.1929	1.7636	19.304	18.713	17.767	14.002	19.348	28.563	27.8	1.5304	3.7936	1.2024
356	Multifunctional tryptophan biosynthesis protein OS=Saccharomyces cerevisiae (strain ATCC 204508 / S288c) OX=559292 GN=TRP3 PE=1 SV=2	P00937	53	14.188	10.038	17.543	12.345	9.2324	7.6553	8.0758	12.602	8.5993	14.714	9.8647	19.895	22.761	15.632
357	Inosine-5'-monophosphate dehydrogenase 4 OS=Saccharomyces cerevisiae (strain ATCC 204508 / S288c) OX=559292 GN=IMD4 PE=1 SV=1	P50094	56	24.828	36.807	25.218	18.518	0	0	0	3.5005	0	6.0588	6.2775	41.321	26.555	26.453
358	ADP-ribosylation factor 1 OS=Saccharomyces cerevisiae (strain ATCC 204508 / S288c) OX=559292 GN=ARF1 PE=1 SV=3	P11076	21	13.005	13.384	17.543	14.991	7.5538	6.8047	11.306	9.1013	10.749	6.9243	7.1743	24.487	16.439	21.644
359	Deoxyhypusine hydroxylase OS=Saccharomyces cerevisiae (strain ATCC 204508 / S288c) OX=559292 GN=LIA1 PE=1 SV=1	P47120	36	5.9115	10.038	13.157	8.818	15.947	13.609	13.729	11.202	20.423	16.445	17.039	7.652	2.5291	7.2146
360	ATPase GET3 OS=Saccharomyces cerevisiae (strain ATCC 204508 / S288c) OX=559292 GN=GET3 PE=1 SV=1	Q12154	39	15.37	8.3652	10.964	9.6997	14.268	15.311	16.152	11.902	8.5993	6.9243	6.2775	21.426	13.91	12.024
361	Ubiquitin-40S ribosomal protein S31 OS=Saccharomyces cerevisiae (strain ATCC 204508 / S288c) OX=559292 GN=RPS31 PE=1 SV=3	P05759	17	15.37	18.403	14.254	8.818	2.5179	2.5518	3.2303	2.1003	10.749	24.235	26.007	13.774	17.703	12.024
362	UBX domain-containing protein 1 OS=Saccharomyces cerevisiae (strain ATCC 204508 / S288c) OX=559292 GN=SHP1 PE=1 SV=1	P34223	47	0	1.673	3.2893	2.6454	31.055	30.621	27.458	22.403	11.824	4.3277	8.9679	0	0	4.8097
363	Retrograde regulation protein 2 OS=Saccharomyces cerevisiae (strain ATCC 204508 / S288c) OX=559292 GN=RTG2 PE=1 SV=2	P32608	66	9.4584	11.711	13.157	10.582	17.626	20.414	20.19	21.003	2.1498	1.7311	0.89679	9.1825	13.91	8.417
364	Small COPII coat GTPase SAR1 OS=Saccharomyces cerevisiae (strain ATCC 204508 / S288c) OX=559292 GN=SAR1 PE=1 SV=1	P20606	21	15.37	13.384	10.964	10.582	10.072	11.908	10.499	8.4012	17.199	6.9243	6.2775	35.199	18.968	19.239
365	Threonine dehydratase, mitochondrial OS=Saccharomyces cerevisiae (strain ATCC 204508 / S288c) OX=559292 GN=ILV1 PE=1 SV=2	P00927	64	22.464	15.057	32.893	22.045	2.5179	0.85059	7.2682	4.9007	0	0.86554	3.5871	45.912	18.968	27.656
366	PAB1-binding protein 1 OS=Saccharomyces cerevisiae (strain ATCC 204508 / S288c) OX=559292 GN=PBP1 PE=1 SV=1	P53297	79	15.37	25.096	16.446	16.754	0	0.85059	1.6152	3.5005	8.5993	12.983	11.658	19.895	32.878	24.049
367	Pyruvate dehydrogenase E1 component subunit alpha, mitochondrial OS=Saccharomyces cerevisiae (strain ATCC 204508 / S288c) OX=559292 GN=PDA1 PE=1 SV=2	P16387	46	17.734	10.038	8.7714	11.463	15.108	11.908	9.691	12.602	5.3746	18.176	17.039	4.5912	6.3226	10.822
368	Ribosome biogenesis protein TSR1 OS=Saccharomyces cerevisiae (strain ATCC 204508 / S288c) OX=559292 GN=TSR1 PE=1 SV=1	Q07381	91	0	0	2.1929	0.8818	5.8752	12.759	21.805	7.7011	39.772	25.966	29.594	3.0608	2.5291	2.4049
369	Aspartate aminotransferase, mitochondrial OS=Saccharomyces cerevisiae (strain ATCC 204508 / S288c) OX=559292 GN=AAT1 PE=1 SV=2	Q01802	52	28.375	31.788	26.314	24.69	0.83931	1.7012	0.80758	2.1003	0	0	0	22.956	25.291	24.049
370	Kelch repeat-containing protein 1 OS=Saccharomyces cerevisiae (strain ATCC 204508 / S288c) OX=559292 GN=KEL1 PE=1 SV=1	P38853	131	27.193	13.384	0	15.872	10.911	13.609	10.499	23.103	16.124	15.58	20.626	0	0	0
371	Protein SST2 OS=Saccharomyces cerevisiae (strain ATCC 204508 / S288c) OX=559292 GN=SST2 PE=1 SV=2	P11972	80	11.823	26.769	25.218	16.754	1.6786	5.1035	1.6152	2.8004	5.3746	3.4622	3.5871	38.26	27.82	19.239
372	Protein BCH1 OS=Saccharomyces cerevisiae (strain ATCC 204508 / S288c) OX=559292 GN=BCH1 PE=1 SV=1	Q05029	82	17.734	25.096	10.964	13.227	5.0359	6.8047	12.921	5.6008	4.2997	1.7311	1.7936	39.791	27.82	14.429
373	Long-chain-fatty-acid--CoA ligase 3 OS=Saccharomyces cerevisiae (strain ATCC 204508 / S288c) OX=559292 GN=FAA3 PE=1 SV=1	P39002	78	15.37	25.096	15.35	14.109	0.83931	1.7012	4.0379	6.3009	2.1498	3.4622	5.3807	27.547	34.142	28.858
374	Eisosome protein 1 OS=Saccharomyces cerevisiae (strain ATCC 204508 / S288c) OX=559292 GN=EIS1 PE=1 SV=1	Q05050	93	22.464	13.384	0	19.399	7.5538	8.5059	1.6152	16.102	8.5993	18.176	17.936	3.0608	16.439	13.227
375	6-phosphogluconate dehydrogenase, decarboxylating 1 OS=Saccharomyces cerevisiae (strain ATCC 204508 / S288c) OX=559292 GN=GND1 PE=1 SV=1	P38720	54	22.464	31.788	26.314	20.281	5.8752	1.7012	0.80758	2.8004	0	4.3277	6.2775	30.608	21.497	21.644
376	60S acidic ribosomal protein P0 OS=Saccharomyces cerevisiae (strain ATCC 204508 / S288c) OX=559292 GN=RPP0 PE=1 SV=2	P05317	34	8.2761	6.6921	4.3857	7.0544	8.3931	8.5059	7.2682	7.001	34.397	24.235	17.039	9.1825	7.5872	7.2146
377	Glutamate 5-kinase OS=Saccharomyces cerevisiae (strain ATCC 204508 / S288c) OX=559292 GN=PRO1 PE=1 SV=2	P32264	47	8.2761	6.6921	8.7714	4.409	26.019	16.161	18.574	19.603	2.1498	19.907	17.936	3.0608	2.5291	7.2146
378	26S proteasome regulatory subunit RPN6 OS=Saccharomyces cerevisiae (strain ATCC 204508 / S288c) OX=559292 GN=RPN6 PE=1 SV=3	Q12377	50	2.3646	0	5.4822	5.2908	20.983	25.518	26.65	21.703	9.6742	7.7899	10.761	9.1825	1.2645	6.0121
379	Translation initiation factor eIF-2B subunit gamma OS=Saccharomyces cerevisiae (strain ATCC 204508 / S288c) OX=559292 GN=GCD1 PE=1 SV=3	P09032	66	2.3646	1.673	1.0964	3.5272	17.626	13.609	18.574	18.203	24.723	17.311	17.039	4.5912	3.7936	2.4049
380	40S ribosomal protein S7-B OS=Saccharomyces cerevisiae (strain ATCC 204508 / S288c) OX=559292 GN=RPS7B PE=1 SV=1	P48164	22	17.734	20.076	14.254	14.109	0.83931	0	7.2682	2.1003	7.5244	16.445	18.833	16.834	24.026	15.632
381	Serine/threonine-protein kinase RIO2 OS=Saccharomyces cerevisiae (strain ATCC 204508 / S288c) OX=559292 GN=RIO2 PE=1 SV=1	P40160	49	3.5469	0	3.2893	0.8818	7.5538	8.5059	13.729	8.4012	40.847	33.756	30.491	0	0	0
382	Vacuolar transporter chaperone 3 OS=Saccharomyces cerevisiae (strain ATCC 204508 / S288c) OX=559292 GN=VTC3 PE=1 SV=1	Q02725	97	0	0	0	2.6454	26.858	15.311	19.382	25.904	7.5244	17.311	20.626	0	0	1.2024
383	Homocitrate synthase, mitochondrial OS=Saccharomyces cerevisiae (strain ATCC 204508 / S288c) OX=559292 GN=LYS21 PE=1 SV=1	Q12122	49	0	20.076	20.832	15.872	10.911	0	12.921	14.002	0	3.4622	0	0	0	14.429
384	NAD-specific glutamate dehydrogenase OS=Saccharomyces cerevisiae (strain ATCC 204508 / S288c) OX=559292 GN=GDH2 PE=1 SV=1	P33327	124	0	0	2.1929	1.7636	25.179	24.667	25.035	26.604	8.5993	5.1932	7.1743	1.5304	0	1.2024
385	Adenosylhomocysteinase OS=Saccharomyces cerevisiae (strain ATCC 204508 / S288c) OX=559292 GN=SAH1 PE=1 SV=1	P39954	49	16.552	10.038	19.736	14.109	16.786	5.1035	13.729	12.602	3.2247	5.1932	7.1743	22.956	13.91	13.227
386	Nucleoporin NUP2 OS=Saccharomyces cerevisiae (strain ATCC 204508 / S288c) OX=559292 GN=NUP2 PE=1 SV=2	P32499	78	1.1823	0	4.3857	7.9362	27.697	25.518	9.691	28.704	3.2247	13.849	9.8647	1.5304	0	0
387	60S ribosomal protein L16-A OS=Saccharomyces cerevisiae (strain ATCC 204508 / S288c) OX=559292 GN=RPL16A PE=1 SV=3	P26784	22	14.188	21.749	6.5786	3.5272	0.83931	1.7012	3.2303	1.4002	7.5244	40.68	41.252	4.5912	5.0581	6.0121
388	40S ribosomal protein S7-A OS=Saccharomyces cerevisiae (strain ATCC 204508 / S288c) OX=559292 GN=RPS7A PE=1 SV=4	P26786	22	14.188	23.423	13.157	10.582	1.6786	3.4024	8.8834	2.1003	10.749	18.176	17.039	13.774	20.232	12.024
389	40S ribosomal protein S13 OS=Saccharomyces cerevisiae (strain ATCC 204508 / S288c) OX=559292 GN=RPS13 PE=1 SV=3	P05756	17	10.641	16.73	10.964	6.1726	6.7145	10.207	6.4607	5.6008	13.974	17.311	14.349	19.895	15.174	12.024
390	Homocitrate synthase, cytosolic isozyme OS=Saccharomyces cerevisiae (strain ATCC 204508 / S288c) OX=559292 GN=LYS20 PE=1 SV=1	P48570	47	22.464	21.749	20.832	12.345	10.911	4.253	11.306	11.202	5.3746	3.4622	6.2775	15.304	16.439	14.429
391	Transketolase 1 OS=Saccharomyces cerevisiae (strain ATCC 204508 / S288c) OX=559292 GN=TKL1 PE=1 SV=4	P23254	74	15.37	21.749	24.121	14.109	5.0359	4.253	2.4227	5.6008	2.1498	7.7899	8.0711	22.956	17.703	14.429
392	RNA polymerase II-associated protein 1 OS=Saccharomyces cerevisiae (strain ATCC 204508 / S288c) OX=559292 GN=PAF1 PE=1 SV=1	P38351	52	5.9115	3.3461	5.4822	4.409	18.465	14.46	15.344	12.602	30.098	16.445	22.42	1.5304	0	0
393	26S proteasome regulatory subunit RPN12 OS=Saccharomyces cerevisiae (strain ATCC 204508 / S288c) OX=559292 GN=RPN12 PE=1 SV=3	P32496	32	0	0	1.0964	3.5272	20.983	22.966	21.805	18.903	11.824	16.445	12.555	3.0608	0	4.8097
394	40S ribosomal protein S18-A OS=Saccharomyces cerevisiae (strain ATCC 204508 / S288c) OX=559292 GN=RPS18A PE=1 SV=1	P0CX55	17	13.005	15.057	10.964	7.9362	7.5538	8.5059	8.8834	6.3009	12.899	20.773	15.245	10.713	13.91	12.024
395	Myosin light chain 1 OS=Saccharomyces cerevisiae (strain ATCC 204508 / S288c) OX=559292 GN=MLC1 PE=1 SV=1	P53141	16	11.823	13.384	7.675	9.6997	8.3931	8.5059	10.499	11.902	7.5244	11.252	11.658	16.834	16.439	12.024
396	ATP synthase subunit gamma, mitochondrial OS=Saccharomyces cerevisiae (strain ATCC 204508 / S288c) OX=559292 GN=ATP3 PE=1 SV=1	P38077	34	30.74	28.442	18.639	22.927	5.0359	3.4024	5.6531	6.3009	1.0749	5.1932	2.6904	15.304	13.91	15.632
397	Alpha,alpha-trehalose-phosphate synthase [UDP-forming] 56 subunit OS=Saccharomyces cerevisiae (strain ATCC 204508 / S288c) OX=559292 GN=TPS1 PE=1 SV=2	Q00764	56	2.3646	3.3461	2.1929	2.6454	25.179	27.219	32.303	21.703	1.0749	1.7311	0.89679	0	2.5291	6.0121
398	Nucleoporin NUP159 OS=Saccharomyces cerevisiae (strain ATCC 204508 / S288c) OX=559292 GN=NUP159 PE=1 SV=1	P40477	159	24.828	8.3652	2.1929	37.917	14.268	11.908	8.8834	15.402	1.0749	9.5209	9.8647	6.1216	0	1.2024
399	Fimbrin OS=Saccharomyces cerevisiae (strain ATCC 204508 / S288c) OX=559292 GN=SAC6 PE=1 SV=1	P32599	72	11.823	10.038	13.157	15.872	18.465	19.564	16.959	18.903	0	0.86554	1.7936	15.304	6.3226	1.2024
400	60S ribosomal protein L24-A OS=Saccharomyces cerevisiae (strain ATCC 204508 / S288c) OX=559292 GN=RPL24A PE=1 SV=1	P04449	18	7.0938	8.3652	0	0	0	0	3.2303	2.1003	39.772	39.815	39.459	0	0	2.4049
401	Periodic tryptophan protein 1 OS=Saccharomyces cerevisiae (strain ATCC 204508 / S288c) OX=559292 GN=PWP1 PE=1 SV=1	P21304	64	10.641	6.6921	8.7714	7.9362	10.072	6.8047	9.691	8.4012	19.348	16.445	15.245	13.774	15.174	16.834
402	Nuclear localization sequence-binding protein OS=Saccharomyces cerevisiae (strain ATCC 204508 / S288c) OX=559292 GN=NSR1 PE=1 SV=1	P27476	45	10.641	8.3652	13.157	13.227	8.3931	11.058	7.2682	9.1013	13.974	16.445	13.452	4.5912	15.174	13.227
403	Protein YSC84 OS=Saccharomyces cerevisiae (strain ATCC 204508 / S288c) OX=559292 GN=YSC84 PE=1 SV=2	P32793	51	28.375	43.499	7.675	23.808	0	5.1035	4.8455	2.8004	2.1498	4.3277	0	18.365	13.91	20.441
404	Translation machinery-associated protein 20 OS=Saccharomyces cerevisiae (strain ATCC 204508 / S288c) OX=559292 GN=TMA20 PE=1 SV=1	P89886	20	22.464	45.172	18.639	15.872	0	0	0	0	0	0	0.89679	32.139	34.142	25.251
405	Structural maintenance of chromosomes protein 1 OS=Saccharomyces cerevisiae (strain ATCC 204508 / S288c) OX=559292 GN=SMC1 PE=1 SV=1	P32908	141	10.641	3.3461	12.061	14.991	3.3572	16.161	23.42	14.002	5.3746	8.6554	5.3807	1.5304	6.3226	2.4049
406	Eukaryotic translation initiation factor 4E OS=Saccharomyces cerevisiae (strain ATCC 204508 / S288c) OX=559292 GN=CDC33 PE=1 SV=1	P07260	24	10.641	13.384	12.061	8.818	17.626	16.161	11.306	12.602	3.2247	0.86554	1.7936	15.304	12.645	8.417
407	Nucleoporin NSP1 OS=Saccharomyces cerevisiae (strain ATCC 204508 / S288c) OX=559292 GN=NSP1 PE=1 SV=1	P14907	87	4.7292	3.3461	4.3857	19.399	18.465	15.311	4.8455	21.003	4.2997	25.101	24.213	1.5304	0	0
408	Glycerol-1-phosphate phosphohydrolase 1 OS=Saccharomyces cerevisiae (strain ATCC 204508 / S288c) OX=559292 GN=GPP1 PE=1 SV=3	P41277	28	18.917	18.403	21.929	15.872	4.1966	0.85059	8.8834	4.9007	2.1498	5.1932	7.1743	16.834	12.645	12.024
409	60S ribosomal protein L16-B OS=Saccharomyces cerevisiae (strain ATCC 204508 / S288c) OX=559292 GN=RPL16B PE=1 SV=3	P26785	22	10.641	25.096	4.3857	5.2908	0	0	2.4227	1.4002	10.749	32.89	38.562	6.1216	8.8517	7.2146
410	Vacuolar transporter chaperone 2 OS=Saccharomyces cerevisiae (strain ATCC 204508 / S288c) OX=559292 GN=VTC2 PE=1 SV=1	P43585	95	1.1823	0	0	3.5272	15.947	14.46	16.152	18.903	16.124	26.832	18.833	0	0	3.6073
411	Exportin-1 OS=Saccharomyces cerevisiae (strain ATCC 204508 / S288c) OX=559292 GN=CRM1 PE=1 SV=1	P30822	124	17.734	11.711	16.446	18.518	9.2324	4.253	19.382	14.002	1.0749	1.7311	0.89679	22.956	6.3226	9.6194
412	Eukaryotic translation initiation factor 4B OS=Saccharomyces cerevisiae (strain ATCC 204508 / S288c) OX=559292 GN=TIF3 PE=1 SV=1	P34167	49	5.9115	10.038	10.964	8.818	24.34	30.621	7.2682	21.703	0	2.5966	0.89679	4.5912	5.0581	10.822
413	Replication factor C subunit 4 OS=Saccharomyces cerevisiae (strain ATCC 204508 / S288c) OX=559292 GN=RFC4 PE=1 SV=1	P40339	36	23.646	36.807	21.929	13.227	3.3572	3.4024	5.6531	3.5005	4.2997	2.5966	5.3807	12.243	35.407	16.834
414	Inosine-5'-monophosphate dehydrogenase 2 OS=Saccharomyces cerevisiae (strain ATCC 204508 / S288c) OX=559292 GN=IMD2 PE=1 SV=1	P38697	57	0	0	0	0	0	0	0	0	0	5.1932	0	36.73	30.349	25.251
415	Flavohemoprotein OS=Saccharomyces cerevisiae (strain ATCC 204508 / S288c) OX=559292 GN=YHB1 PE=1 SV=2	P39676	45	15.37	18.403	16.446	8.818	10.911	8.5059	10.499	10.501	3.2247	8.6554	7.1743	27.547	16.439	8.417
416	Transcription factor SPN1 OS=Saccharomyces cerevisiae (strain ATCC 204508 / S288c) OX=559292 GN=SPN1 PE=1 SV=1	Q06505	46	22.464	30.115	10.964	15.872	9.2324	11.908	8.8834	9.1013	0	0	0	19.895	18.968	16.834
417	60S ribosomal protein L24-B OS=Saccharomyces cerevisiae (strain ATCC 204508 / S288c) OX=559292 GN=RPL24B PE=1 SV=1	P24000	18	4.7292	10.038	1.0964	0.8818	0.83931	0.85059	2.4227	1.4002	37.622	40.68	38.562	1.5304	1.2645	1.2024
418	Serine/threonine-protein kinase YPK1 OS=Saccharomyces cerevisiae (strain ATCC 204508 / S288c) OX=559292 GN=YPK1 PE=1 SV=2	P12688	76	30.74	26.769	10.964	16.754	6.7145	4.253	4.8455	4.9007	0	0.86554	0	32.139	16.439	20.441
419	40S ribosomal protein S24-A OS=Saccharomyces cerevisiae (strain ATCC 204508 / S288c) OX=559292 GN=RPS24A PE=1 SV=1	P0CX31	15	8.2761	10.038	6.5786	4.409	1.6786	4.253	8.0758	2.1003	16.124	22.504	26.904	15.304	13.91	8.417
420	Dihydroxy-acid dehydratase, mitochondrial OS=Saccharomyces cerevisiae (strain ATCC 204508 / S288c) OX=559292 GN=ILV3 PE=1 SV=2	P39522	63	18.917	11.711	23.025	21.163	11.75	7.6553	4.0379	11.202	0	2.5966	2.6904	9.1825	12.645	13.227
421	Aromatic/aminoadipate aminotransferase 1 OS=Saccharomyces cerevisiae (strain ATCC 204508 / S288c) OX=559292 GN=ARO8 PE=1 SV=1	P53090	56	18.917	26.769	21.929	16.754	7.5538	0.85059	6.4607	14.002	0	2.5966	1.7936	21.426	18.968	18.036
422	Vesicular-fusion protein SEC18 OS=Saccharomyces cerevisiae (strain ATCC 204508 / S288c) OX=559292 GN=SEC18 PE=1 SV=2	P18759	84	30.74	18.403	17.543	18.518	1.6786	0	4.0379	0.7001	0	1.7311	0	48.973	18.968	21.644
423	Trehalose synthase complex regulatory subunit TSL1 OS=Saccharomyces cerevisiae (strain ATCC 204508 / S288c) OX=559292 GN=TSL1 PE=1 SV=1	P38427	123	0	0	0	1.7636	26.019	26.368	29.073	24.503	0	2.5966	2.6904	0	0	1.2024
424	Proteasome subunit beta type-2 OS=Saccharomyces cerevisiae (strain ATCC 204508 / S288c) OX=559292 GN=PUP1 PE=1 SV=1	P25043	28	9.4584	6.6921	5.4822	7.0544	11.75	11.908	12.921	11.202	15.049	11.252	8.9679	9.1825	10.116	12.024
425	Actin-related protein 2 OS=Saccharomyces cerevisiae (strain ATCC 204508 / S288c) OX=559292 GN=ARP2 PE=1 SV=1	P32381	44	15.37	10.038	14.254	17.636	9.2324	7.6553	9.691	11.202	2.1498	6.0588	7.1743	16.834	11.381	12.024
426	DNA-directed RNA polymerase III subunit RPC2 OS=Saccharomyces cerevisiae (strain ATCC 204508 / S288c) OX=559292 GN=RET1 PE=1 SV=2	P22276	129	1.1823	5.0191	19.736	3.5272	8.3931	11.058	15.344	11.902	19.348	16.445	15.245	0	3.7936	2.4049
427	Nucleoporin NUP133 OS=Saccharomyces cerevisiae (strain ATCC 204508 / S288c) OX=559292 GN=NUP133 PE=1 SV=1	P36161	133	21.281	0	7.675	19.399	15.947	16.161	17.767	16.102	2.1498	3.4622	1.7936	4.5912	0	0
428	Vacuolar transporter chaperone 4 OS=Saccharomyces cerevisiae (strain ATCC 204508 / S288c) OX=559292 GN=VTC4 PE=1 SV=2	P47075	83	0	0	1.0964	1.7636	25.179	17.012	16.152	19.603	13.974	16.445	14.349	0	0	3.6073
429	Proteasome subunit beta type-5 OS=Saccharomyces cerevisiae (strain ATCC 204508 / S288c) OX=559292 GN=PRE2 PE=1 SV=3	P30656	32	9.4584	11.711	5.4822	5.2908	13.429	14.46	11.306	9.8014	19.348	8.6554	10.761	4.5912	8.8517	12.024
430	Proteasome subunit beta type-6 OS=Saccharomyces cerevisiae (strain ATCC 204508 / S288c) OX=559292 GN=PRE7 PE=1 SV=1	P23724	27	3.5469	1.673	4.3857	3.5272	15.108	10.207	13.729	11.902	20.423	19.042	19.729	1.5304	1.2645	1.2024
431	60S ribosomal protein L6-A OS=Saccharomyces cerevisiae (strain ATCC 204508 / S288c) OX=559292 GN=RPL6A PE=1 SV=2	Q02326	20	15.37	20.076	6.5786	5.2908	0	0	1.6152	0.7001	11.824	28.563	29.594	13.774	11.381	10.822
432	Coronin-like protein OS=Saccharomyces cerevisiae (strain ATCC 204508 / S288c) OX=559292 GN=CRN1 PE=1 SV=1	Q06440	73	7.0938	13.384	0	1.7636	36.09	39.127	0	21.003	0	1.7311	0	0	0	6.0121
433	Signal recognition particle subunit SRP72 OS=Saccharomyces cerevisiae (strain ATCC 204508 / S288c) OX=559292 GN=SRP72 PE=1 SV=2	P38688	74	1.1823	1.673	1.0964	12.345	15.108	17.862	19.382	9.8014	15.049	15.58	17.936	0	0	2.4049
434	Protein BFR2 OS=Saccharomyces cerevisiae (strain ATCC 204508 / S288c) OX=559292 GN=BFR2 PE=1 SV=1	Q06631	61	2.3646	1.673	0	2.6454	4.1966	5.1035	16.152	7.001	41.922	30.294	24.213	1.5304	0	2.4049
435	Cell division cycle protein CDT1 OS=Saccharomyces cerevisiae (strain ATCC 204508 / S288c) OX=559292 GN=TAH11 PE=1 SV=1	P47112	68	30.74	23.423	14.254	42.326	1.6786	0.85059	2.4227	0	1.0749	0	0	26.017	10.116	8.417
436	THO complex subunit HPR1 OS=Saccharomyces cerevisiae (strain ATCC 204508 / S288c) OX=559292 GN=HPR1 PE=1 SV=2	P17629	88	0	0	0	0	5.8752	5.9541	16.959	7.001	36.547	26.832	25.11	0	0	0
437	Vacuolar protein sorting-associated protein 53 OS=Saccharomyces cerevisiae (strain ATCC 204508 / S288c) OX=559292 GN=VPS53 PE=1 SV=1	P47061	95	36.651	11.711	8.7714	30.863	2.5179	3.4024	10.499	5.6008	1.0749	0.86554	0.89679	9.1825	5.0581	14.429
438	60S ribosomal protein L19-B OS=Saccharomyces cerevisiae (strain ATCC 204508 / S288c) OX=559292 GN=RPL19B PE=1 SV=1	P0CX83	22	2.3646	0	2.1929	1.7636	0.83931	1.7012	2.4227	0.7001	39.772	38.084	38.562	1.5304	1.2645	1.2024
439	Seventh homolog of septin 1 OS=Saccharomyces cerevisiae (strain ATCC 204508 / S288c) OX=559292 GN=SHS1 PE=1 SV=1	Q07657	63	3.5469	0	1.0964	0.8818	15.108	19.564	11.306	21.703	26.873	12.983	13.452	1.5304	1.2645	0
440	ADP-ribosylation factor 2 OS=Saccharomyces cerevisiae (strain ATCC 204508 / S288c) OX=559292 GN=ARF2 PE=1 SV=3	P19146	21	10.641	0	16.446	14.109	0	6.8047	10.499	7.001	8.5993	0	6.2775	19.895	13.91	19.239
441	40S ribosomal protein S20 OS=Saccharomyces cerevisiae (strain ATCC 204508 / S288c) OX=559292 GN=RPS20 PE=1 SV=3	P38701	14	9.4584	20.076	7.675	8.818	4.1966	5.1035	8.0758	6.3009	13.974	13.849	18.833	10.713	15.174	10.822
442	Actin cytoskeleton-regulatory complex protein SLA1 OS=Saccharomyces cerevisiae (strain ATCC 204508 / S288c) OX=559292 GN=SLA1 PE=1 SV=1	P32790	136	21.281	20.076	6.5786	13.227	2.5179	5.9541	8.0758	8.4012	1.0749	2.5966	2.6904	13.774	29.084	21.644
443	Adenylate cyclase OS=Saccharomyces cerevisiae (strain ATCC 204508 / S288c) OX=559292 GN=CYR1 PE=1 SV=2	P08678	228	0	0	1.0964	0	19.304	27.219	9.691	20.303	15.049	15.58	17.039	1.5304	0	1.2024
444	Maintenance of telomere capping protein 1 OS=Saccharomyces cerevisiae (strain ATCC 204508 / S288c) OX=559292 GN=MTC1 PE=1 SV=1	P47018	53	3.5469	3.3461	1.0964	6.1726	17.626	19.564	14.536	13.302	17.199	12.118	10.761	6.1216	1.2645	3.6073
445	Exocyst complex component SEC5 OS=Saccharomyces cerevisiae (strain ATCC 204508 / S288c) OX=559292 GN=SEC5 PE=1 SV=1	P89102	112	10.641	5.0191	2.1929	15.872	12.59	11.908	19.382	16.102	7.5244	11.252	6.2775	10.713	1.2645	2.4049
446	Homoisocitrate dehydrogenase, mitochondrial OS=Saccharomyces cerevisiae (strain ATCC 204508 / S288c) OX=559292 GN=LYS12 PE=1 SV=1	P40495	40	22.464	5.0191	21.929	15.872	2.5179	1.7012	0.80758	2.1003	1.0749	3.4622	3.5871	44.382	22.761	21.644
447	Probable 26S proteasome regulatory subunit p28 OS=Saccharomyces cerevisiae (strain ATCC 204508 / S288c) OX=559292 GN=NAS6 PE=1 SV=1	P50086	26	1.1823	3.3461	0	0.8818	33.572	30.621	18.574	12.602	4.2997	7.7899	6.2775	0	0	7.2146
448	Ribosomal RNA-processing protein 12 OS=Saccharomyces cerevisiae (strain ATCC 204508 / S288c) OX=559292 GN=RRP12 PE=1 SV=1	Q12754	138	4.7292	0	9.8679	16.754	8.3931	7.6553	14.536	7.001	19.348	10.386	13.452	6.1216	5.0581	10.822
449	FK506-binding protein 4 OS=Saccharomyces cerevisiae (strain ATCC 204508 / S288c) OX=559292 GN=FPR4 PE=1 SV=1	Q06205	44	11.823	16.73	8.7714	7.0544	5.8752	5.9541	6.4607	5.6008	29.023	14.714	14.349	0	11.381	6.0121
450	Vacuolar import and degradation protein 27 OS=Saccharomyces cerevisiae (strain ATCC 204508 / S288c) OX=559292 GN=VID27 PE=1 SV=1	P40157	89	1.1823	0	6.5786	13.227	10.911	9.3565	7.2682	10.501	11.824	8.6554	11.658	13.774	17.703	18.036
451	Suppressor of yeast profilin deletion OS=Saccharomyces cerevisiae (strain ATCC 204508 / S288c) OX=559292 GN=SYP1 PE=1 SV=3	P25623	96	21.281	30.115	4.3857	21.163	0	0	0	0	0	1.7311	0	27.547	35.407	36.073
452	Glycogen [starch] synthase isoform 2 OS=Saccharomyces cerevisiae (strain ATCC 204508 / S288c) OX=559292 GN=GSY2 PE=1 SV=3	P27472	80	0	0	2.1929	0.8818	13.429	11.058	20.19	16.102	24.723	12.983	17.039	0	1.2645	2.4049
453	THO complex subunit 2 OS=Saccharomyces cerevisiae (strain ATCC 204508 / S288c) OX=559292 GN=THO2 PE=1 SV=1	P53552	184	0	0	2.1929	0	7.5538	6.8047	14.536	3.5005	44.072	29.428	26.904	0	0	0
454	Histidine--tRNA ligase, mitochondrial OS=Saccharomyces cerevisiae (strain ATCC 204508 / S288c) OX=559292 GN=HTS1 PE=1 SV=2	P07263	60	15.37	21.749	21.929	11.463	14.268	10.207	12.921	16.102	0	0	0.89679	4.5912	3.7936	4.8097
455	40S ribosomal protein S23-B OS=Saccharomyces cerevisiae (strain ATCC 204508 / S288c) OX=559292 GN=RPS23B PE=1 SV=1	P0CX30	16	11.823	13.384	1.0964	1.7636	2.5179	2.5518	1.6152	2.1003	19.348	30.294	29.594	4.5912	3.7936	1.2024
456	Trehalose-phosphatase OS=Saccharomyces cerevisiae (strain ATCC 204508 / S288c) OX=559292 GN=TPS2 PE=1 SV=3	P31688	103	1.1823	3.3461	4.3857	1.7636	20.983	17.862	29.073	24.503	1.0749	0.86554	0.89679	1.5304	5.0581	3.6073
457	PX domain-containing protein YPR097W OS=Saccharomyces cerevisiae (strain ATCC 204508 / S288c) OX=559292 GN=YPR097W PE=1 SV=2	Q06839	123	30.74	20.076	0	20.281	13.429	17.012	13.729	15.402	1.0749	3.4622	1.7936	1.5304	0	2.4049
458	Ubiquitin carboxyl-terminal hydrolase 2 OS=Saccharomyces cerevisiae (strain ATCC 204508 / S288c) OX=559292 GN=UBP2 PE=1 SV=2	Q01476	146	0	0	1.0964	0	21.822	21.265	26.65	21.003	12.899	7.7899	4.4839	0	0	3.6073
459	Cytoplasmic export protein 1 OS=Saccharomyces cerevisiae (strain ATCC 204508 / S288c) OX=559292 GN=CEX1 PE=1 SV=1	Q12453	85	13.005	3.3461	6.5786	20.281	10.072	11.908	11.306	11.202	4.2997	2.5966	2.6904	26.017	2.5291	12.024
460	L-threo-3-hydroxyaspartate ammonia-lyase OS=Saccharomyces cerevisiae (strain ATCC 204508 / S288c) OX=559292 GN=SRY1 PE=1 SV=1	P36007	35	24.828	18.403	6.5786	22.927	1.6786	0.85059	2.4227	5.6008	0	2.5966	4.4839	13.774	29.084	26.453
461	Sulfite reductase [NADPH] flavoprotein component OS=Saccharomyces cerevisiae (strain ATCC 204508 / S288c) OX=559292 GN=MET10 PE=1 SV=2	P39692	115	5.9115	0	6.5786	10.582	15.947	19.564	18.574	20.303	1.0749	2.5966	3.5871	13.774	3.7936	1.2024
462	60S ribosomal protein L32 OS=Saccharomyces cerevisiae (strain ATCC 204508 / S288c) OX=559292 GN=RPL32 PE=1 SV=1	P38061	15	4.7292	13.384	0	1.7636	0.83931	1.7012	3.2303	1.4002	32.247	29.428	30.491	3.0608	2.5291	2.4049
463	27S pre-rRNA (guanosine(2922)-2'-O)-methyltransferase OS=Saccharomyces cerevisiae (strain ATCC 204508 / S288c) OX=559292 GN=SPB1 PE=1 SV=2	P25582	96	1.1823	0	3.2893	0.8818	0	0	0	0.7001	40.847	35.487	32.284	4.5912	11.381	7.2146
464	ADP-ribosylation factor GTPase-activating protein GLO3 OS=Saccharomyces cerevisiae (strain ATCC 204508 / S288c) OX=559292 GN=GLO3 PE=1 SV=1	P38682	55	21.281	35.134	2.1929	18.518	0	0	0	2.8004	0	0.86554	0.89679	33.669	36.671	25.251
465	Suppressor protein STM1 OS=Saccharomyces cerevisiae (strain ATCC 204508 / S288c) OX=559292 GN=STM1 PE=1 SV=3	P39015	30	11.823	25.096	10.964	8.818	0	0	0	0	5.3746	11.252	8.9679	19.895	34.142	30.061
466	Protein MLP1 OS=Saccharomyces cerevisiae (strain ATCC 204508 / S288c) OX=559292 GN=MLP1 PE=1 SV=2	Q02455	218	0	0	1.0964	0	20.983	23.817	33.111	31.504	0	0.86554	0	0	0	0
467	Translationally-controlled tumor protein homolog OS=Saccharomyces cerevisiae (strain ATCC 204508 / S288c) OX=559292 GN=TMA19 PE=1 SV=1	P35691	19	7.0938	10.038	8.7714	6.1726	11.75	9.3565	15.344	11.902	9.6742	6.9243	7.1743	9.1825	10.116	14.429
468	Proteasome subunit beta type-1 OS=Saccharomyces cerevisiae (strain ATCC 204508 / S288c) OX=559292 GN=PRE3 PE=1 SV=2	P38624	24	3.5469	1.673	8.7714	5.2908	10.911	16.161	13.729	13.302	11.824	7.7899	9.8647	12.243	6.3226	9.6194
469	Protein SLY1 OS=Saccharomyces cerevisiae (strain ATCC 204508 / S288c) OX=559292 GN=SLY1 PE=1 SV=1	P22213	75	3.5469	0	1.0964	2.6454	14.268	15.311	2.4227	15.402	20.423	20.773	20.626	6.1216	1.2645	1.2024
470	ARF guanine-nucleotide exchange factor 2 OS=Saccharomyces cerevisiae (strain ATCC 204508 / S288c) OX=559292 GN=GEA2 PE=1 SV=1	P39993	166	1.1823	0	4.3857	6.1726	19.304	20.414	19.382	21.003	2.1498	8.6554	7.1743	1.5304	0	1.2024
471	ATP-dependent clpX-like chaperone, mitochondrial OS=Saccharomyces cerevisiae (strain ATCC 204508 / S288c) OX=559292 GN=MCX1 PE=1 SV=1	P38323	58	24.828	10.038	18.639	23.808	0.83931	1.7012	4.0379	0.7001	0	0	0	16.834	20.232	22.846
472	25S rRNA (cytosine(2870)-C(5))-methyltransferase OS=Saccharomyces cerevisiae (strain ATCC 204508 / S288c) OX=559292 GN=NOP2 PE=1 SV=1	P40991	70	0	0	0	0	0.83931	4.253	5.6531	0.7001	46.221	36.353	33.181	0	0	2.4049
473	Pre-mRNA-splicing helicase BRR2 OS=Saccharomyces cerevisiae (strain ATCC 204508 / S288c) OX=559292 GN=BRR2 PE=1 SV=2	P32639	246	0	0	0	0	6.7145	7.6553	23.42	14.002	30.098	23.37	12.555	1.5304	0	0
474	Protein transport protein SEC13 OS=Saccharomyces cerevisiae (strain ATCC 204508 / S288c) OX=559292 GN=SEC13 PE=1 SV=1	Q04491	33	5.9115	6.6921	7.675	6.1726	15.108	15.311	17.767	13.302	12.899	4.3277	7.1743	9.1825	7.5872	6.0121
475	40S ribosomal protein S22-A OS=Saccharomyces cerevisiae (strain ATCC 204508 / S288c) OX=559292 GN=RPS22A PE=1 SV=2	P0C0W1	15	13.005	18.403	10.964	6.1726	0.83931	0.85059	6.4607	2.8004	11.824	12.983	12.555	16.834	15.174	14.429
476	ATP-dependent RNA helicase DRS1 OS=Saccharomyces cerevisiae (strain ATCC 204508 / S288c) OX=559292 GN=DRS1 PE=1 SV=2	P32892	85	1.1823	0	0	0.8818	0	0.85059	3.2303	0.7001	48.371	37.218	35.871	0	0	0
477	Exocyst complex component EXO84 OS=Saccharomyces cerevisiae (strain ATCC 204508 / S288c) OX=559292 GN=EXO84 PE=1 SV=1	P38261	86	8.2761	3.3461	2.1929	17.636	12.59	13.609	12.114	11.202	13.974	10.386	10.761	9.1825	5.0581	6.0121
478	ATP-dependent RNA helicase DBP6 OS=Saccharomyces cerevisiae (strain ATCC 204508 / S288c) OX=559292 GN=DBP6 PE=1 SV=1	P53734	70	16.552	0	21.929	27.336	0	1.7012	0	1.4002	21.498	19.042	21.523	1.5304	1.2645	6.0121
479	Serine/threonine-protein kinase KIN2 OS=Saccharomyces cerevisiae (strain ATCC 204508 / S288c) OX=559292 GN=KIN2 PE=1 SV=3	P13186	128	24.828	15.057	1.0964	28.217	0	0.85059	0	0	0	0.86554	0	22.956	18.968	42.085
480	Protein SKG3 OS=Saccharomyces cerevisiae (strain ATCC 204508 / S288c) OX=559292 GN=SKG3 PE=1 SV=1	Q06315	114	26.01	25.096	9.8679	23.808	0	0	0	0	0	0	0	38.26	22.761	28.858
481	Importin beta SMX1 OS=Saccharomyces cerevisiae (strain ATCC 204508 / S288c) OX=559292 GN=SXM1 PE=1 SV=1	Q04175	108	8.2761	8.3652	5.4822	3.5272	12.59	11.908	11.306	7.7011	8.5993	5.1932	8.9679	16.834	6.3226	12.024
482	Exocyst complex component SEC10 OS=Saccharomyces cerevisiae (strain ATCC 204508 / S288c) OX=559292 GN=SEC10 PE=1 SV=1	Q06245	100	8.2761	5.0191	5.4822	17.636	11.75	9.3565	7.2682	9.1013	6.4495	7.7899	7.1743	19.895	8.8517	6.0121
483	Ribosome biogenesis ATPase RIX7 OS=Saccharomyces cerevisiae (strain ATCC 204508 / S288c) OX=559292 GN=RIX7 PE=1 SV=1	Q07844	93	8.2761	1.673	10.964	13.227	2.5179	3.4024	4.0379	2.1003	18.274	23.37	17.039	7.652	5.0581	3.6073
484	Resistance to glucose repression protein 1 OS=Saccharomyces cerevisiae (strain ATCC 204508 / S288c) OX=559292 GN=REG1 PE=1 SV=1	Q00816	113	0	0	0	0.8818	18.465	20.414	11.306	14.702	11.824	20.773	17.936	0	0	0
485	Peroxiredoxin DOT5 OS=Saccharomyces cerevisiae (strain ATCC 204508 / S288c) OX=559292 GN=DOT5 PE=1 SV=1	P40553	24	26.01	31.788	17.543	15.872	0	0	0	0	0	0	0	21.426	30.349	19.239
486	Uncharacterized protein YPL245W OS=Saccharomyces cerevisiae (strain ATCC 204508 / S288c) OX=559292 GN=YPL245W PE=1 SV=1	Q12179	52	22.464	21.749	16.446	14.109	0	0	0	0	0	0	0	24.487	29.084	26.453
487	Translation initiation factor eIF-2B subunit beta OS=Saccharomyces cerevisiae (strain ATCC 204508 / S288c) OX=559292 GN=GCD7 PE=1 SV=1	P32502	43	10.641	6.6921	7.675	7.9362	9.2324	10.207	12.921	9.1013	15.049	9.5209	7.1743	4.5912	3.7936	7.2146
488	Serine/threonine-protein phosphatase PP1-2 OS=Saccharomyces cerevisiae (strain ATCC 204508 / S288c) OX=559292 GN=GLC7 PE=1 SV=1	P32598	36	13.005	10.038	7.675	9.6997	10.911	11.058	14.536	14.002	9.6742	6.9243	8.9679	7.652	6.3226	6.0121
489	ATPase family gene 2 protein OS=Saccharomyces cerevisiae (strain ATCC 204508 / S288c) OX=559292 GN=AFG2 PE=1 SV=1	P32794	85	23.646	5.0191	16.446	20.281	2.5179	2.5518	2.4227	3.5005	8.5993	6.9243	8.9679	18.365	8.8517	9.6194
490	Protein STU2 OS=Saccharomyces cerevisiae (strain ATCC 204508 / S288c) OX=559292 GN=STU2 PE=1 SV=1	P46675	101	40.198	18.403	0	25.572	0	0.85059	0	0	0	0	0	19.895	18.968	26.453
491	Alpha-soluble NSF attachment protein OS=Saccharomyces cerevisiae (strain ATCC 204508 / S288c) OX=559292 GN=SEC17 PE=1 SV=4	P32602	33	0	0	0	0	19.304	11.908	8.8834	14.702	19.348	23.37	24.213	0	0	0
492	Inorganic pyrophosphatase OS=Saccharomyces cerevisiae (strain ATCC 204508 / S288c) OX=559292 GN=IPP1 PE=1 SV=4	P00817	32	14.188	23.423	25.218	12.345	2.5179	3.4024	1.6152	2.8004	1.0749	8.6554	6.2775	21.426	22.761	13.227
493	Ubiquitin-binding protein CUE5 OS=Saccharomyces cerevisiae (strain ATCC 204508 / S288c) OX=559292 GN=CUE5 PE=1 SV=1	Q08412	47	1.1823	3.3461	0	3.5272	18.465	19.564	20.19	13.302	5.3746	12.983	11.658	0	1.2645	3.6073
494	ATP-dependent RNA helicase DBP1 OS=Saccharomyces cerevisiae (strain ATCC 204508 / S288c) OX=559292 GN=DBP1 PE=1 SV=2	P24784	68	15.37	0	0	12.345	0	2.5518	0	0	0	0	0	12.243	27.82	16.834
495	GTP-binding nuclear protein GSP1/CNR1 OS=Saccharomyces cerevisiae (strain ATCC 204508 / S288c) OX=559292 GN=GSP1 PE=1 SV=1	P32835	25	8.2761	5.0191	5.4822	3.5272	5.0359	4.253	9.691	4.2006	16.124	11.252	9.8647	12.243	13.91	8.417
496	60S ribosomal protein L21-B OS=Saccharomyces cerevisiae (strain ATCC 204508 / S288c) OX=559292 GN=RPL21B PE=1 SV=1	Q12672	18	13.005	10.038	3.2893	3.5272	3.3572	2.5518	2.4227	2.8004	20.423	24.235	21.523	6.1216	6.3226	6.0121
497	Proteasome subunit beta type-7 OS=Saccharomyces cerevisiae (strain ATCC 204508 / S288c) OX=559292 GN=PRE4 PE=1 SV=1	P30657	29	5.9115	3.3461	5.4822	5.2908	11.75	10.207	12.114	7.001	17.199	12.118	12.555	6.1216	1.2645	4.8097
498	Myosin-4 OS=Saccharomyces cerevisiae (strain ATCC 204508 / S288c) OX=559292 GN=MYO4 PE=1 SV=1	P32492	169	20.099	3.3461	9.8679	28.217	5.0359	5.1035	4.8455	3.5005	1.0749	0.86554	1.7936	33.669	6.3226	14.429
499	Carbon catabolite-derepressing protein kinase OS=Saccharomyces cerevisiae (strain ATCC 204508 / S288c) OX=559292 GN=SNF1 PE=1 SV=1	P06782	72	0	0	1.0964	0.8818	15.947	15.311	12.114	13.302	17.199	18.176	9.8647	0	0	1.2024
500	ATP-dependent RNA helicase DHH1 OS=Saccharomyces cerevisiae (strain ATCC 204508 / S288c) OX=559292 GN=DHH1 PE=1 SV=1	P39517	58	22.464	26.769	27.411	10.582	5.0359	2.5518	0	0	0	0	0	35.199	20.232	19.239
501	Dihydroxyacetone kinase 1 OS=Saccharomyces cerevisiae (strain ATCC 204508 / S288c) OX=559292 GN=DAK1 PE=1 SV=1	P54838	62	3.5469	1.673	7.675	1.7636	21.822	14.46	22.612	21.703	0	0.86554	4.4839	0	7.5872	4.8097
502	ATP phosphoribosyltransferase OS=Saccharomyces cerevisiae (strain ATCC 204508 / S288c) OX=559292 GN=HIS1 PE=1 SV=1	P00498	32	9.4584	6.6921	15.35	10.582	10.911	8.5059	11.306	14.002	0	0	0.89679	12.243	13.91	13.227
503	60S ribosomal protein L9-A OS=Saccharomyces cerevisiae (strain ATCC 204508 / S288c) OX=559292 GN=RPL9A PE=1 SV=2	P05738	22	13.005	16.73	7.675	6.1726	0	0	3.2303	0	18.274	18.176	17.936	12.243	13.91	7.2146
504	60S ribosomal protein L6-B OS=Saccharomyces cerevisiae (strain ATCC 204508 / S288c) OX=559292 GN=RPL6B PE=1 SV=4	P05739	20	14.188	16.73	7.675	7.0544	0	0	0	0	10.749	25.966	25.11	10.713	8.8517	8.417
505	Protein dopey OS=Saccharomyces cerevisiae (strain ATCC 204508 / S288c) OX=559292 GN=DOP1 PE=1 SV=1	Q03921	195	27.193	15.057	7.675	14.109	1.6786	5.1035	4.0379	1.4002	4.2997	3.4622	7.1743	10.713	17.703	18.036
506	Proliferating cell nuclear antigen OS=Saccharomyces cerevisiae (strain ATCC 204508 / S288c) OX=559292 GN=POL30 PE=1 SV=1	P15873	29	3.5469	1.673	7.675	3.5272	10.911	15.311	15.344	11.902	10.749	13.849	11.658	3.0608	2.5291	6.0121
507	FACT complex subunit POB3 OS=Saccharomyces cerevisiae (strain ATCC 204508 / S288c) OX=559292 GN=POB3 PE=1 SV=1	Q04636	63	4.7292	1.673	0	0	12.59	11.908	13.729	11.202	21.498	11.252	12.555	0	2.5291	3.6073
508	60S ribosomal protein L21-A OS=Saccharomyces cerevisiae (strain ATCC 204508 / S288c) OX=559292 GN=RPL21A PE=1 SV=1	Q02753	18	13.005	0	0	0	0	0	0	0	19.348	23.37	20.626	0	0	0
509	Guanine nucleotide-binding protein subunit beta-like protein OS=Saccharomyces cerevisiae (strain ATCC 204508 / S288c) OX=559292 GN=ASC1 PE=1 SV=4	P38011	35	17.734	11.711	17.543	12.345	2.5179	2.5518	7.2682	4.9007	6.4495	8.6554	7.1743	19.895	12.645	12.024
510	Probable di- and tripeptidase DUG2 OS=Saccharomyces cerevisiae (strain ATCC 204508 / S288c) OX=559292 GN=DUG2 PE=1 SV=1	P38149	98	3.5469	1.673	1.0964	2.6454	14.268	17.862	18.574	13.302	2.1498	0	0.89679	0	2.5291	1.2024
511	Nuclear cap-binding protein complex subunit 1 OS=Saccharomyces cerevisiae (strain ATCC 204508 / S288c) OX=559292 GN=STO1 PE=1 SV=2	P34160	100	1.1823	1.673	0	1.7636	14.268	13.609	24.227	14.002	8.5993	11.252	11.658	0	0	4.8097
512	ATP-dependent RNA helicase HAS1 OS=Saccharomyces cerevisiae (strain ATCC 204508 / S288c) OX=559292 GN=HAS1 PE=1 SV=1	Q03532	57	21.281	20.076	19.736	10.582	0	0	0	0	2.1498	5.1932	3.5871	13.774	26.555	18.036
513	Mannan polymerase I complex VAN1 subunit OS=Saccharomyces cerevisiae (strain ATCC 204508 / S288c) OX=559292 GN=VAN1 PE=1 SV=3	P23642	61	5.9115	3.3461	0	0	11.75	12.759	6.4607	14.002	20.423	15.58	21.523	0	0	7.2146
514	Replication factor C subunit 1 OS=Saccharomyces cerevisiae (strain ATCC 204508 / S288c) OX=559292 GN=RFC1 PE=1 SV=1	P38630	95	17.734	21.749	20.832	21.163	0.83931	0.85059	1.6152	2.8004	1.0749	2.5966	3.5871	3.0608	30.349	10.822
515	Glutamine synthetase OS=Saccharomyces cerevisiae (strain ATCC 204508 / S288c) OX=559292 GN=GLN1 PE=1 SV=4	P32288	42	8.2761	15.057	15.35	8.818	12.59	5.9541	11.306	14.702	0	4.3277	7.1743	7.652	8.8517	10.822
516	Glycerophosphocholine phosphodiesterase GDE1 OS=Saccharomyces cerevisiae (strain ATCC 204508 / S288c) OX=559292 GN=GDE1 PE=1 SV=1	Q02979	138	2.3646	0	13.157	12.345	13.429	14.46	18.574	18.903	0	5.1932	2.6904	0	0	1.2024
517	Lethal(2) giant larvae protein homolog SRO7 OS=Saccharomyces cerevisiae (strain ATCC 204508 / S288c) OX=559292 GN=SRO7 PE=1 SV=1	Q12038	115	31.922	26.769	12.061	22.927	0	0	0	0	0	0	0	18.365	26.555	22.846
518	Choline-phosphate cytidylyltransferase OS=Saccharomyces cerevisiae (strain ATCC 204508 / S288c) OX=559292 GN=PCT1 PE=1 SV=2	P13259	49	8.2761	13.384	0	4.409	7.5538	9.3565	3.2303	9.1013	10.749	12.118	8.9679	10.713	10.116	8.417
519	Cell wall assembly regulator SMI1 OS=Saccharomyces cerevisiae (strain ATCC 204508 / S288c) OX=559292 GN=SMI1 PE=1 SV=1	P32566	57	0	0	0	0	7.5538	6.8047	6.4607	9.8014	21.498	30.294	24.213	0	0	0
520	40S ribosomal protein S12 OS=Saccharomyces cerevisiae (strain ATCC 204508 / S288c) OX=559292 GN=RPS12 PE=1 SV=1	P48589	15	11.823	15.057	6.5786	6.1726	6.7145	8.5059	5.6531	4.9007	12.899	11.252	11.658	19.895	8.8517	9.6194
521	Ribosome assembly protein 1 OS=Saccharomyces cerevisiae (strain ATCC 204508 / S288c) OX=559292 GN=RIA1 PE=1 SV=1	P53893	124	4.7292	0	2.1929	3.5272	13.429	13.609	17.767	16.102	10.749	9.5209	9.8647	3.0608	0	2.4049
522	Protein SIP5 OS=Saccharomyces cerevisiae (strain ATCC 204508 / S288c) OX=559292 GN=SIP5 PE=1 SV=1	P40210	56	26.01	36.807	8.7714	16.754	0	0	0	1.4002	1.0749	4.3277	3.5871	15.304	26.555	9.6194
523	DNA-directed RNA polymerase III subunit RPC3 OS=Saccharomyces cerevisiae (strain ATCC 204508 / S288c) OX=559292 GN=RPC82 PE=1 SV=2	P32349	74	2.3646	0	1.0964	0	8.3931	11.058	15.344	11.202	21.498	21.638	18.833	0	0	0
524	RHO GTPase-activating protein RGD1 OS=Saccharomyces cerevisiae (strain ATCC 204508 / S288c) OX=559292 GN=RGD1 PE=1 SV=1	P38339	75	5.9115	1.673	12.061	7.9362	7.5538	10.207	0	9.8014	21.498	13.849	8.0711	10.713	7.5872	6.0121
525	Ubiquitin fusion degradation protein 4 OS=Saccharomyces cerevisiae (strain ATCC 204508 / S288c) OX=559292 GN=UFD4 PE=1 SV=1	P33202	168	3.5469	0	3.2893	4.409	15.108	17.012	15.344	9.1013	7.5244	4.3277	3.5871	7.652	0	1.2024
526	Nucleolar protein NET1 OS=Saccharomyces cerevisiae (strain ATCC 204508 / S288c) OX=559292 GN=NET1 PE=1 SV=1	P47035	129	1.1823	0	5.4822	11.463	0.83931	1.7012	0.80758	4.9007	18.274	26.832	22.42	4.5912	10.116	12.024
527	Clathrin light chain OS=Saccharomyces cerevisiae (strain ATCC 204508 / S288c) OX=559292 GN=CLC1 PE=1 SV=1	P17891	27	3.5469	3.3461	3.2893	0.8818	13.429	11.908	12.921	9.8014	16.124	15.58	16.142	0	0	0
528	DNA mismatch repair protein MSH6 OS=Saccharomyces cerevisiae (strain ATCC 204508 / S288c) OX=559292 GN=MSH6 PE=1 SV=1	Q03834	140	2.3646	0	1.0964	5.2908	11.75	16.161	17.767	15.402	17.199	12.118	8.0711	0	0	0
529	Exocyst complex component SEC15 OS=Saccharomyces cerevisiae (strain ATCC 204508 / S288c) OX=559292 GN=SEC15 PE=1 SV=2	P22224	105	8.2761	1.673	8.7714	17.636	5.0359	10.207	13.729	11.202	3.2247	1.7311	9.8647	15.304	5.0581	7.2146
530	Conserved oligomeric Golgi complex subunit 3 OS=Saccharomyces cerevisiae (strain ATCC 204508 / S288c) OX=559292 GN=COG3 PE=1 SV=1	P40094	93	17.734	3.3461	6.5786	14.109	11.75	11.058	7.2682	9.1013	2.1498	2.5966	4.4839	9.1825	0	13.227
531	Cell cycle protein kinase DBF2 OS=Saccharomyces cerevisiae (strain ATCC 204508 / S288c) OX=559292 GN=DBF2 PE=1 SV=3	P22204	66	21.281	18.403	27.411	14.991	1.6786	0.85059	1.6152	4.2006	0	1.7311	0	15.304	17.703	15.632
532	Nucleolar protein 4 OS=Saccharomyces cerevisiae (strain ATCC 204508 / S288c) OX=559292 GN=NOP4 PE=1 SV=1	P37838	78	2.3646	0	3.2893	0.8818	2.5179	4.253	4.8455	1.4002	35.472	32.89	25.11	0	0	0
533	U3 small nucleolar RNA-associated protein 14 OS=Saccharomyces cerevisiae (strain ATCC 204508 / S288c) OX=559292 GN=UTP14 PE=1 SV=1	Q04500	103	0	0	7.675	7.0544	0.83931	8.5059	1.6152	6.3009	31.173	29.428	19.729	0	2.5291	1.2024
534	Cyclin-dependent kinase 1 OS=Saccharomyces cerevisiae (strain ATCC 204508 / S288c) OX=559292 GN=CDC28 PE=1 SV=1	P00546	34	14.188	10.038	10.964	9.6997	5.8752	5.9541	7.2682	5.6008	2.1498	2.5966	2.6904	19.895	10.116	13.227
535	Peptidyl-prolyl cis-trans isomerase OS=Saccharomyces cerevisiae (strain ATCC 204508 / S288c) OX=559292 GN=CPR1 PE=1 SV=3	P14832	17	11.823	25.096	20.832	13.227	3.3572	2.5518	3.2303	4.9007	0	6.9243	6.2775	10.713	11.381	9.6194
536	ATP-dependent RNA helicase HCA4 OS=Saccharomyces cerevisiae (strain ATCC 204508 / S288c) OX=559292 GN=HCA4 PE=1 SV=2	P20448	87	13.005	6.6921	20.832	5.2908	0	1.7012	0	1.4002	7.5244	15.58	8.9679	10.713	26.555	14.429
537	Ribosome biogenesis protein ENP2 OS=Saccharomyces cerevisiae (strain ATCC 204508 / S288c) OX=559292 GN=ENP2 PE=1 SV=2	P48234	82	2.3646	0	0	0.8818	2.5179	3.4024	11.306	4.2006	36.547	25.966	19.729	0	1.2645	0
538	Cell division control protein 11 OS=Saccharomyces cerevisiae (strain ATCC 204508 / S288c) OX=559292 GN=CDC11 PE=1 SV=1	P32458	48	0	0	1.0964	0	13.429	14.46	14.536	12.602	21.498	9.5209	12.555	0	6.3226	2.4049
539	Mannosyl-oligosaccharide glucosidase OS=Saccharomyces cerevisiae (strain ATCC 204508 / S288c) OX=559292 GN=CWH41 PE=1 SV=1	P53008	97	1.1823	0	1.0964	0.8818	6.7145	11.908	18.574	16.102	15.049	18.176	11.658	0	0	0
540	Ribosome biogenesis protein BMS1 OS=Saccharomyces cerevisiae (strain ATCC 204508 / S288c) OX=559292 GN=BMS1 PE=1 SV=1	Q08965	136	1.1823	0	26.314	0.8818	0	0	1.6152	0	26.873	20.773	19.729	0	13.91	0
541	Pyrroline-5-carboxylate reductase OS=Saccharomyces cerevisiae (strain ATCC 204508 / S288c) OX=559292 GN=PRO3 PE=1 SV=1	P32263	30	10.641	10.038	7.675	7.9362	10.911	14.46	12.921	11.202	4.2997	4.3277	4.4839	12.243	7.5872	7.2146
542	DNA-directed RNA polymerase I subunit RPA43 OS=Saccharomyces cerevisiae (strain ATCC 204508 / S288c) OX=559292 GN=RPA43 PE=1 SV=2	P46669	36	5.9115	5.0191	6.5786	4.409	4.1966	6.8047	7.2682	6.3009	16.124	12.983	14.349	9.1825	7.5872	8.417
543	UV excision repair protein RAD23 OS=Saccharomyces cerevisiae (strain ATCC 204508 / S288c) OX=559292 GN=RAD23 PE=1 SV=1	P32628	42	1.1823	3.3461	5.4822	2.6454	15.947	20.414	20.19	16.102	4.2997	2.5966	8.9679	0	2.5291	3.6073
544	ATP-dependent RNA helicase DBP5 OS=Saccharomyces cerevisiae (strain ATCC 204508 / S288c) OX=559292 GN=DBP5 PE=1 SV=2	P20449	54	20.099	8.3652	13.157	14.991	0	0	0	2.8004	0	0	1.7936	59.686	15.174	18.036
545	DNA polymerase alpha catalytic subunit A OS=Saccharomyces cerevisiae (strain ATCC 204508 / S288c) OX=559292 GN=POL1 PE=1 SV=2	P13382	167	0	0	0	0.8818	10.911	16.161	8.8834	15.402	26.873	12.983	13.452	0	0	0
546	Glutamine-dependent NAD(+) synthetase OS=Saccharomyces cerevisiae (strain ATCC 204508 / S288c) OX=559292 GN=QNS1 PE=1 SV=1	P38795	81	0	0	2.1929	0.8818	22.661	21.265	27.458	22.403	0	0	0.89679	0	0	2.4049
547	Importin subunit beta-1 OS=Saccharomyces cerevisiae (strain ATCC 204508 / S288c) OX=559292 GN=KAP95 PE=1 SV=1	Q06142	95	10.641	5.0191	2.1929	9.6997	12.59	14.46	15.344	12.602	3.2247	2.5966	6.2775	19.895	3.7936	2.4049
548	40S ribosomal protein S11-B OS=Saccharomyces cerevisiae (strain ATCC 204508 / S288c) OX=559292 GN=RPS11B PE=1 SV=1	P0CX48	18	2.3646	3.3461	8.7714	4.409	8.3931	6.8047	6.4607	4.9007	12.899	21.638	22.42	4.5912	5.0581	6.0121
549	Suppressor of kinetochore protein 1 OS=Saccharomyces cerevisiae (strain ATCC 204508 / S288c) OX=559292 GN=SKP1 PE=1 SV=2	P52286	22	2.3646	1.673	3.2893	6.1726	9.2324	10.207	10.499	9.8014	17.199	17.311	16.142	1.5304	1.2645	2.4049
550	Carboxypeptidase S OS=Saccharomyces cerevisiae (strain ATCC 204508 / S288c) OX=559292 GN=CPS1 PE=1 SV=2	P27614	65	0	0	3.2893	0.8818	18.465	21.265	20.997	16.102	4.2997	4.3277	7.1743	0	0	1.2024
551	N-terminal acetyltransferase B complex subunit MDM20 OS=Saccharomyces cerevisiae (strain ATCC 204508 / S288c) OX=559292 GN=MDM20 PE=1 SV=1	Q12387	93	20.099	20.076	20.832	12.345	0	0	0	0	0	0	0	22.956	32.878	18.036
552	1,3-beta-glucan synthase component GSC2 OS=Saccharomyces cerevisiae (strain ATCC 204508 / S288c) OX=559292 GN=GSC2 PE=1 SV=2	P40989	217	0	0	0	0	3.3572	0	9.691	9.1013	0	36.353	41.252	0	0	0
553	CTP synthase 2 OS=Saccharomyces cerevisiae (strain ATCC 204508 / S288c) OX=559292 GN=URA8 PE=1 SV=4	P38627	65	7.0938	0	9.8679	5.2908	12.59	17.862	16.959	9.8014	3.2247	1.7311	0.89679	12.243	10.116	10.822
554	40S ribosomal protein S16-B OS=Saccharomyces cerevisiae (strain ATCC 204508 / S288c) OX=559292 GN=RPS16B PE=1 SV=1	P0CX52	16	7.0938	6.6921	8.7714	6.1726	0.83931	0	4.0379	2.1003	10.749	17.311	25.11	9.1825	16.439	13.227
555	Anthranilate synthase component 1 OS=Saccharomyces cerevisiae (strain ATCC 204508 / S288c) OX=559292 GN=TRP2 PE=1 SV=4	P00899	57	8.2761	8.3652	18.639	6.1726	18.465	4.253	14.536	15.402	0	0	0.89679	10.713	7.5872	9.6194
556	DNA replication licensing factor MCM3 OS=Saccharomyces cerevisiae (strain ATCC 204508 / S288c) OX=559292 GN=MCM3 PE=1 SV=1	P24279	108	4.7292	0	6.5786	2.6454	11.75	12.759	16.959	16.102	5.3746	12.118	12.555	4.5912	0	0
557	L-asparaginase 1 OS=Saccharomyces cerevisiae (strain ATCC 204508 / S288c) OX=559292 GN=ASP1 PE=1 SV=1	P38986	41	2.3646	3.3461	6.5786	3.5272	20.143	17.862	16.152	15.402	0	9.5209	8.9679	0	0	6.0121
558	Transaldolase OS=Saccharomyces cerevisiae (strain ATCC 204508 / S288c) OX=559292 GN=TAL1 PE=1 SV=4	P15019	37	13.005	25.096	23.025	18.518	0	0	0	1.4002	0	1.7311	3.5871	9.1825	24.026	15.632
559	Palmitoyltransferase AKR1 OS=Saccharomyces cerevisiae (strain ATCC 204508 / S288c) OX=559292 GN=AKR1 PE=1 SV=1	P39010	86	1.1823	1.673	0	0	15.108	12.759	5.6531	11.902	17.199	13.849	20.626	0	0	4.8097
560	Pyruvate dehydrogenase E1 component subunit beta, mitochondrial OS=Saccharomyces cerevisiae (strain ATCC 204508 / S288c) OX=559292 GN=PDB1 PE=1 SV=2	P32473	40	11.823	10.038	5.4822	7.9362	7.5538	5.9541	7.2682	9.8014	10.749	15.58	12.555	4.5912	3.7936	6.0121
561	Survival factor 1 OS=Saccharomyces cerevisiae (strain ATCC 204508 / S288c) OX=559292 GN=SVF1 PE=1 SV=1	Q05515	54	7.0938	3.3461	4.3857	3.5272	9.2324	8.5059	9.691	11.202	16.124	12.983	11.658	3.0608	7.5872	3.6073
562	Glycerol-3-phosphate dehydrogenase [NAD(+)] 2, mitochondrial OS=Saccharomyces cerevisiae (strain ATCC 204508 / S288c) OX=559292 GN=GPD2 PE=1 SV=2	P41911	49	2.3646	3.3461	10.964	6.1726	11.75	17.012	12.114	12.602	8.5993	6.0588	6.2775	6.1216	2.5291	4.8097
563	Transcription initiation factor TFIID subunit 6 OS=Saccharomyces cerevisiae (strain ATCC 204508 / S288c) OX=559292 GN=TAF6 PE=1 SV=1	P53040	58	11.823	3.3461	6.5786	15.872	1.6786	2.5518	7.2682	4.9007	15.049	12.983	10.761	18.365	5.0581	10.822
564	Ribosome assembly protein RRB1 OS=Saccharomyces cerevisiae (strain ATCC 204508 / S288c) OX=559292 GN=RRB1 PE=1 SV=1	Q04225	57	13.005	8.3652	16.446	2.6454	5.0359	8.5059	15.344	7.001	19.348	6.0588	3.5871	1.5304	16.439	3.6073
565	Pyruvate decarboxylase isozyme 2 OS=Saccharomyces cerevisiae (strain ATCC 204508 / S288c) OX=559292 GN=PDC5 PE=1 SV=4	P16467	62	11.823	16.73	15.35	0	7.5538	8.5059	0	3.5005	5.3746	5.1932	8.0711	27.547	12.645	0
566	60S ribosomal protein L11-B OS=Saccharomyces cerevisiae (strain ATCC 204508 / S288c) OX=559292 GN=RPL11B PE=1 SV=3	Q3E757	20	8.2761	10.038	7.675	6.1726	1.6786	2.5518	3.2303	2.1003	18.274	16.445	16.142	13.774	12.645	7.2146
567	Protein phosphatase 2C homolog 3 OS=Saccharomyces cerevisiae (strain ATCC 204508 / S288c) OX=559292 GN=PTC3 PE=1 SV=4	P34221	51	1.1823	1.673	1.0964	0.8818	13.429	17.862	13.729	11.202	16.124	12.118	12.555	1.5304	1.2645	1.2024
568	E3 ubiquitin-protein ligase UBR1 OS=Saccharomyces cerevisiae (strain ATCC 204508 / S288c) OX=559292 GN=UBR1 PE=1 SV=1	P19812	225	0	0	0	0	18.465	21.265	20.19	13.302	9.6742	8.6554	8.9679	0	0	0
569	DNA polymerase alpha-binding protein OS=Saccharomyces cerevisiae (strain ATCC 204508 / S288c) OX=559292 GN=CTF4 PE=1 SV=2	Q01454	104	0	0	0	0	14.268	13.609	20.997	15.402	11.824	7.7899	7.1743	0	0	0
570	DNA-directed RNA polymerases I and III subunit RPAC2 OS=Saccharomyces cerevisiae (strain ATCC 204508 / S288c) OX=559292 GN=RPC19 PE=1 SV=1	P28000	16	4.7292	13.384	4.3857	5.2908	6.7145	8.5059	8.0758	7.7011	17.199	14.714	14.349	4.5912	10.116	4.8097
571	60S ribosomal protein L28 OS=Saccharomyces cerevisiae (strain ATCC 204508 / S288c) OX=559292 GN=RPL28 PE=1 SV=3	P02406	17	1.1823	0	3.2893	1.7636	4.1966	4.253	5.6531	3.5005	29.023	25.101	25.11	1.5304	1.2645	3.6073
572	Isocitrate dehydrogenase [NADP], mitochondrial OS=Saccharomyces cerevisiae (strain ATCC 204508 / S288c) OX=559292 GN=IDP1 PE=1 SV=1	P21954	48	23.646	11.711	19.736	21.163	0.83931	0	2.4227	2.8004	0	2.5966	2.6904	15.304	11.381	13.227
573	D-3-phosphoglycerate dehydrogenase 2 OS=Saccharomyces cerevisiae (strain ATCC 204508 / S288c) OX=559292 GN=SER33 PE=1 SV=1	P40510	51	9.4584	1.673	6.5786	8.818	15.947	14.46	18.574	17.502	0	0	0.89679	3.0608	3.7936	3.6073
574	C-1-tetrahydrofolate synthase, mitochondrial OS=Saccharomyces cerevisiae (strain ATCC 204508 / S288c) OX=559292 GN=MIS1 PE=1 SV=1	P09440	106	13.005	8.3652	27.411	21.163	3.3572	0	0	0.7001	2.1498	2.5966	1.7936	9.1825	18.968	12.024
575	Large subunit GTPase 1 OS=Saccharomyces cerevisiae (strain ATCC 204508 / S288c) OX=559292 GN=LSG1 PE=1 SV=1	P53145	73	16.552	13.384	6.5786	14.991	0	0	0	0	2.1498	10.386	9.8647	12.243	24.026	18.036
576	RNA polymerase-associated protein RTF1 OS=Saccharomyces cerevisiae (strain ATCC 204508 / S288c) OX=559292 GN=RTF1 PE=1 SV=2	P53064	66	0	0	1.0964	0.8818	12.59	13.609	13.729	10.501	21.498	15.58	10.761	0	0	0
577	Glycogen phosphorylase OS=Saccharomyces cerevisiae (strain ATCC 204508 / S288c) OX=559292 GN=GPH1 PE=1 SV=4	P06738	103	0	0	4.3857	0.8818	1.6786	1.7012	29.073	16.102	18.274	14.714	17.936	0	0	0
578	Importin subunit beta-3 OS=Saccharomyces cerevisiae (strain ATCC 204508 / S288c) OX=559292 GN=PSE1 PE=1 SV=2	P32337	121	16.552	10.038	9.8679	12.345	5.8752	8.5059	3.2303	4.2006	1.0749	0.86554	1.7936	35.199	6.3226	10.822
579	Proteasome subunit beta type-4 OS=Saccharomyces cerevisiae (strain ATCC 204508 / S288c) OX=559292 GN=PRE1 PE=1 SV=2	P22141	23	1.1823	1.673	4.3857	4.409	13.429	12.759	11.306	7.7011	10.749	8.6554	7.1743	7.652	2.5291	4.8097
580	Pescadillo homolog OS=Saccharomyces cerevisiae (strain ATCC 204508 / S288c) OX=559292 GN=NOP7 PE=1 SV=1	P53261	70	1.1823	1.673	9.8679	5.2908	3.3572	5.1035	6.4607	3.5005	23.648	19.907	18.833	1.5304	1.2645	3.6073
581	Protein STU1 OS=Saccharomyces cerevisiae (strain ATCC 204508 / S288c) OX=559292 GN=STU1 PE=1 SV=1	P38198	174	22.464	3.3461	15.35	25.572	4.1966	5.1035	2.4227	6.3009	0	0	0	9.1825	5.0581	13.227
582	Spermidine synthase OS=Saccharomyces cerevisiae (strain ATCC 204508 / S288c) OX=559292 GN=SPE3 PE=3 SV=1	Q12074	33	9.4584	6.6921	14.254	10.582	14.268	12.759	10.499	11.202	0	0	0	12.243	12.645	6.0121
583	RNA annealing protein YRA1 OS=Saccharomyces cerevisiae (strain ATCC 204508 / S288c) OX=559292 GN=YRA1 PE=1 SV=2	Q12159	25	7.0938	8.3652	10.964	7.0544	0	0	0	0	15.049	15.58	15.245	12.243	16.439	16.834
584	Aspartate aminotransferase, cytoplasmic OS=Saccharomyces cerevisiae (strain ATCC 204508 / S288c) OX=559292 GN=AAT2 PE=1 SV=3	P23542	46	17.734	13.384	28.507	19.399	0	0	0	0.7001	0	2.5966	0.89679	21.426	17.703	15.632
585	Translation initiation factor eIF-2B subunit alpha OS=Saccharomyces cerevisiae (strain ATCC 204508 / S288c) OX=559292 GN=GCN3 PE=1 SV=1	P14741	34	4.7292	3.3461	4.3857	8.818	10.072	10.207	16.152	13.302	13.974	5.1932	8.0711	7.652	3.7936	3.6073
586	Protein SIS1 OS=Saccharomyces cerevisiae (strain ATCC 204508 / S288c) OX=559292 GN=SIS1 PE=1 SV=1	P25294	38	4.7292	10.038	20.832	7.9362	3.3572	4.253	4.0379	4.2006	2.1498	7.7899	14.349	12.243	25.291	10.822
587	GMP synthase [glutamine-hydrolyzing] OS=Saccharomyces cerevisiae (strain ATCC 204508 / S288c) OX=559292 GN=GUA1 PE=1 SV=4	P38625	58	11.823	15.057	23.025	11.463	4.1966	2.5518	6.4607	2.8004	2.1498	2.5966	0.89679	19.895	15.174	10.822
588	AP-3 complex subunit beta OS=Saccharomyces cerevisiae (strain ATCC 204508 / S288c) OX=559292 GN=APL6 PE=1 SV=2	P46682	92	10.641	5.0191	5.4822	14.991	8.3931	12.759	5.6531	10.501	10.749	7.7899	8.0711	0	2.5291	4.8097
589	Dihydrolipoyl dehydrogenase, mitochondrial OS=Saccharomyces cerevisiae (strain ATCC 204508 / S288c) OX=559292 GN=LPD1 PE=1 SV=1	P09624	54	10.641	1.673	13.157	10.582	4.1966	5.9541	7.2682	9.8014	0	17.311	16.142	9.1825	0	3.6073
590	U3 small nucleolar RNA-associated protein 10 OS=Saccharomyces cerevisiae (strain ATCC 204508 / S288c) OX=559292 GN=UTP10 PE=1 SV=1	P42945	200	5.9115	0	29.604	17.636	0	0	0	0	13.974	7.7899	9.8647	9.1825	5.0581	10.822
591	NET1-associated nuclear protein 1 OS=Saccharomyces cerevisiae (strain ATCC 204508 / S288c) OX=559292 GN=NAN1 PE=1 SV=1	Q02931	101	2.3646	1.673	16.446	4.409	2.5179	4.253	12.921	12.602	19.348	9.5209	11.658	4.5912	6.3226	1.2024
592	60S ribosomal protein L26-A OS=Saccharomyces cerevisiae (strain ATCC 204508 / S288c) OX=559292 GN=RPL26A PE=1 SV=3	P05743	14	5.9115	5.0191	5.4822	3.5272	0.83931	0.85059	1.6152	1.4002	13.974	14.714	17.039	10.713	13.91	10.822
593	Protein phosphatase PP2A regulatory subunit A OS=Saccharomyces cerevisiae (strain ATCC 204508 / S288c) OX=559292 GN=TPD3 PE=1 SV=3	P31383	71	0	0	4.3857	2.6454	16.786	15.311	15.344	10.501	5.3746	7.7899	8.0711	7.652	1.2645	2.4049
594	Cell division control protein 73 OS=Saccharomyces cerevisiae (strain ATCC 204508 / S288c) OX=559292 GN=CDC73 PE=1 SV=1	Q06697	44	2.3646	0	3.2893	0.8818	11.75	12.759	11.306	7.7011	18.274	10.386	9.8647	0	0	0
595	Protein SKT5 OS=Saccharomyces cerevisiae (strain ATCC 204508 / S288c) OX=559292 GN=SKT5 PE=1 SV=1	P34226	77	21.281	16.73	10.964	21.163	0	0	0	0	0	0	0	21.426	20.232	18.036
596	ATP-dependent RNA helicase DBP8 OS=Saccharomyces cerevisiae (strain ATCC 204508 / S288c) OX=559292 GN=DBP8 PE=1 SV=1	P38719	48	18.917	21.749	16.446	14.991	0	0	0	0	0	0	0	24.487	24.026	22.846
597	Something about silencing protein 10 OS=Saccharomyces cerevisiae (strain ATCC 204508 / S288c) OX=559292 GN=SAS10 PE=1 SV=1	Q12136	70	11.823	6.6921	3.2893	0.8818	0.83931	0	4.8455	2.8004	24.723	24.235	26.007	0	2.5291	3.6073
598	Arginine--tRNA ligase, cytoplasmic OS=Saccharomyces cerevisiae (strain ATCC 204508 / S288c) OX=559292 GN=YDR341C PE=1 SV=1	Q05506	70	14.188	15.057	21.929	18.518	1.6786	0	0	4.2006	0	0	2.6904	4.5912	15.174	14.429
599	Translation machinery-associated protein 22 OS=Saccharomyces cerevisiae (strain ATCC 204508 / S288c) OX=559292 GN=TMA22 PE=1 SV=1	P47089	22	16.552	33.461	14.254	10.582	0	0	0	0	0	0	0	26.017	22.761	16.834
600	Cruciform DNA-recognizing protein 1 OS=Saccharomyces cerevisiae (strain ATCC 204508 / S288c) OX=559292 GN=CRP1 PE=1 SV=1	P38845	51	2.3646	5.0191	4.3857	5.2908	8.3931	12.759	19.382	17.502	3.2247	6.0588	2.6904	7.652	7.5872	6.0121
601	U3 small nucleolar RNA-associated protein MPP10 OS=Saccharomyces cerevisiae (strain ATCC 204508 / S288c) OX=559292 GN=MPP10 PE=1 SV=1	P47083	67	13.005	6.6921	2.1929	2.6454	0	0.85059	2.4227	0.7001	23.648	30.294	22.42	4.5912	3.7936	4.8097
602	Protein kinase-like protein SCY1 OS=Saccharomyces cerevisiae (strain ATCC 204508 / S288c) OX=559292 GN=SCY1 PE=1 SV=1	P53009	91	16.552	18.403	15.35	18.518	0	0	0	0	0	0	0	16.834	29.084	18.036
603	40S ribosomal protein S19-B OS=Saccharomyces cerevisiae (strain ATCC 204508 / S288c) OX=559292 GN=RPS19B PE=1 SV=2	P07281	16	9.4584	8.3652	5.4822	4.409	4.1966	4.253	4.8455	3.5005	6.4495	13.849	10.761	9.1825	12.645	12.024
604	Casein kinase II subunit alpha OS=Saccharomyces cerevisiae (strain ATCC 204508 / S288c) OX=559292 GN=CKA1 PE=1 SV=1	P15790	45	2.3646	0	5.4822	1.7636	9.2324	10.207	16.959	9.8014	17.199	8.6554	10.761	0	1.2645	1.2024
605	60S ribosomal protein L31-A OS=Saccharomyces cerevisiae (strain ATCC 204508 / S288c) OX=559292 GN=RPL31A PE=1 SV=1	P0C2H8	13	8.2761	5.0191	7.675	6.1726	0	0	2.4227	0	20.423	16.445	14.349	7.652	15.174	9.6194
606	Phosphatidylinositol 4-kinase PIK1 OS=Saccharomyces cerevisiae (strain ATCC 204508 / S288c) OX=559292 GN=PIK1 PE=1 SV=1	P39104	120	30.74	26.769	17.543	18.518	5.0359	3.4024	5.6531	9.1013	0	0	0	0	3.7936	2.4049
607	Casein kinase II subunit alpha' OS=Saccharomyces cerevisiae (strain ATCC 204508 / S288c) OX=559292 GN=CKA2 PE=1 SV=2	P19454	39	9.4584	5.0191	7.675	4.409	10.072	11.908	8.0758	7.7011	11.824	11.252	8.0711	4.5912	6.3226	3.6073
608	Polyamine N-acetyltransferase 1 OS=Saccharomyces cerevisiae (strain ATCC 204508 / S288c) OX=559292 GN=PAA1 PE=1 SV=1	Q12447	22	4.7292	5.0191	6.5786	5.2908	10.072	11.058	12.114	11.202	3.2247	3.4622	6.2775	7.652	5.0581	4.8097
609	ADP-ribosylation factor-binding protein GGA2 OS=Saccharomyces cerevisiae (strain ATCC 204508 / S288c) OX=559292 GN=GGA2 PE=1 SV=1	P38817	64	14.188	21.749	9.8679	12.345	4.1966	3.4024	5.6531	7.001	0	0.86554	0	29.078	10.116	12.024
610	D-3-phosphoglycerate dehydrogenase 1 OS=Saccharomyces cerevisiae (strain ATCC 204508 / S288c) OX=559292 GN=SER3 PE=1 SV=1	P40054	51	9.4584	0	8.7714	7.9362	17.626	15.311	16.959	14.002	0	0	0	0	0	6.0121
611	Translation machinery-associated protein 7 OS=Saccharomyces cerevisiae (strain ATCC 204508 / S288c) OX=559292 GN=TMA7 PE=1 SV=1	Q3E764	7	18.917	30.115	13.157	11.463	0	0	0	0	0	0	0	16.834	20.232	13.227
612	DNA-directed RNA polymerases I, II, and III subunit RPABC1 OS=Saccharomyces cerevisiae (strain ATCC 204508 / S288c) OX=559292 GN=RPB5 PE=1 SV=1	P20434	25	7.0938	5.0191	6.5786	4.409	4.1966	5.9541	9.691	7.001	8.5993	10.386	10.761	12.243	11.381	9.6194
613	40S ribosomal protein S21-B OS=Saccharomyces cerevisiae (strain ATCC 204508 / S288c) OX=559292 GN=RPS21B PE=1 SV=1	Q3E754	10	8.2761	6.6921	3.2893	4.409	7.5538	7.6553	9.691	5.6008	6.4495	14.714	15.245	9.1825	5.0581	3.6073
614	Protein SSD1 OS=Saccharomyces cerevisiae (strain ATCC 204508 / S288c) OX=559292 GN=SSD1 PE=1 SV=1	P24276	140	5.9115	1.673	5.4822	11.463	13.429	10.207	15.344	11.902	1.0749	0.86554	3.5871	3.0608	3.7936	7.2146
615	Protein SDA1 OS=Saccharomyces cerevisiae (strain ATCC 204508 / S288c) OX=559292 GN=SDA1 PE=1 SV=1	P53313	87	3.5469	1.673	17.543	9.6997	0	0	1.6152	0	24.723	20.773	18.833	3.0608	2.5291	1.2024
616	E4 ubiquitin-protein ligase UFD2 OS=Saccharomyces cerevisiae (strain ATCC 204508 / S288c) OX=559292 GN=UFD2 PE=1 SV=3	P54860	110	3.5469	0	4.3857	3.5272	17.626	20.414	22.612	14.702	0	0	0.89679	3.0608	1.2645	2.4049
617	NADPH dehydrogenase 2 OS=Saccharomyces cerevisiae (strain ATCC 204508 / S288c) OX=559292 GN=OYE2 PE=1 SV=3	Q03558	45	15.37	20.076	26.314	15.872	0	0	0	0	0	3.4622	3.5871	16.834	13.91	14.429
618	Ribosome-interacting GTPase 2 OS=Saccharomyces cerevisiae (strain ATCC 204508 / S288c) OX=559292 GN=RBG2 PE=1 SV=1	P53295	41	7.0938	1.673	6.5786	9.6997	5.0359	10.207	13.729	9.8014	10.749	3.4622	5.3807	13.774	5.0581	9.6194
619	U3 small nucleolar ribonucleoprotein protein IMP4 OS=Saccharomyces cerevisiae (strain ATCC 204508 / S288c) OX=559292 GN=IMP4 PE=1 SV=1	P53941	33	16.552	10.038	9.8679	12.345	0.83931	1.7012	1.6152	0.7001	13.974	12.983	8.9679	6.1216	8.8517	9.6194
620	Homoserine dehydrogenase OS=Saccharomyces cerevisiae (strain ATCC 204508 / S288c) OX=559292 GN=HOM6 PE=1 SV=1	P31116	39	14.188	20.076	17.543	13.227	2.5179	0.85059	2.4227	2.8004	0	4.3277	4.4839	16.834	15.174	18.036
621	Uncharacterized protein MRP8 OS=Saccharomyces cerevisiae (strain ATCC 204508 / S288c) OX=559292 GN=MRP8 PE=1 SV=1	P35719	25	1.1823	0	7.675	4.409	22.661	23.817	15.344	15.402	0	0	0	0	1.2645	1.2024
622	Probable alpha-1,6-mannosyltransferase MNN11 OS=Saccharomyces cerevisiae (strain ATCC 204508 / S288c) OX=559292 GN=MNN11 PE=1 SV=2	P46985	48	1.1823	0	0	0	13.429	11.908	7.2682	11.202	21.498	14.714	13.452	0	0	0
623	Nucleoporin SEH1 OS=Saccharomyces cerevisiae (strain ATCC 204508 / S288c) OX=559292 GN=SEH1 PE=1 SV=1	P53011	39	11.823	11.711	15.35	8.818	5.8752	2.5518	8.0758	7.001	4.2997	3.4622	3.5871	9.1825	12.645	13.227
624	Nucleolar GTP-binding protein 2 OS=Saccharomyces cerevisiae (strain ATCC 204508 / S288c) OX=559292 GN=NOG2 PE=1 SV=1	P53742	55	7.0938	3.3461	9.8679	7.0544	0.83931	0.85059	3.2303	1.4002	16.124	13.849	14.349	9.1825	10.116	19.239
625	Peroxiredoxin AHP1 OS=Saccharomyces cerevisiae (strain ATCC 204508 / S288c) OX=559292 GN=AHP1 PE=1 SV=4	P38013	19	8.2761	11.711	10.964	9.6997	10.072	3.4024	8.0758	11.902	0	1.7311	1.7936	12.243	8.8517	14.429
626	Nucleolar complex protein 14 OS=Saccharomyces cerevisiae (strain ATCC 204508 / S288c) OX=559292 GN=NOP14 PE=1 SV=1	Q99207	94	7.0938	3.3461	7.675	12.345	0	0.85059	1.6152	1.4002	12.899	17.311	17.039	1.5304	10.116	15.632
627	Nucleolar complex-associated protein 3 OS=Saccharomyces cerevisiae (strain ATCC 204508 / S288c) OX=559292 GN=NOC3 PE=1 SV=1	Q07896	76	1.1823	0	4.3857	2.6454	0	0	1.6152	0.7001	37.622	28.563	26.904	0	0	1.2024
628	60S ribosomal protein L8-B OS=Saccharomyces cerevisiae (strain ATCC 204508 / S288c) OX=559292 GN=RPL8B PE=1 SV=3	P29453	28	7.0938	0	9.8679	7.0544	0	0	0	4.2006	12.899	0	11.658	10.713	15.174	12.024
629	ATP-dependent RNA helicase MAK5 OS=Saccharomyces cerevisiae (strain ATCC 204508 / S288c) OX=559292 GN=MAK5 PE=1 SV=1	P38112	87	2.3646	0	1.0964	0.8818	0	0	1.6152	0	36.547	32.89	33.181	0	1.2645	0
630	Ribose-phosphate pyrophosphokinase 3 OS=Saccharomyces cerevisiae (strain ATCC 204508 / S288c) OX=559292 GN=PRS3 PE=1 SV=1	P38689	35	11.823	10.038	10.964	7.9362	3.3572	5.9541	8.0758	1.4002	13.974	5.1932	7.1743	10.713	11.381	8.417
631	60S ribosome subunit biogenesis protein NIP7 OS=Saccharomyces cerevisiae (strain ATCC 204508 / S288c) OX=559292 GN=NIP7 PE=1 SV=1	Q08962	20	10.641	8.3652	12.061	7.9362	0.83931	1.7012	3.2303	0.7001	16.124	12.118	9.8647	10.713	11.381	8.417
632	Replication factor C subunit 5 OS=Saccharomyces cerevisiae (strain ATCC 204508 / S288c) OX=559292 GN=RFC5 PE=1 SV=1	P38251	40	17.734	20.076	14.254	8.818	1.6786	3.4024	4.0379	2.1003	1.0749	0.86554	0.89679	7.652	36.671	13.227
633	Oxysterol-binding protein homolog 2 OS=Saccharomyces cerevisiae (strain ATCC 204508 / S288c) OX=559292 GN=OSH2 PE=1 SV=1	Q12451	146	5.9115	0	9.8679	17.636	14.268	12.759	3.2303	16.102	1.0749	1.7311	0.89679	3.0608	3.7936	1.2024
634	Serine/threonine-protein kinase PSK1 OS=Saccharomyces cerevisiae (strain ATCC 204508 / S288c) OX=559292 GN=PSK1 PE=1 SV=2	P31374	152	13.005	0	7.675	13.227	10.911	11.058	7.2682	10.501	6.4495	5.1932	4.4839	4.5912	0	1.2024
635	Protein MAK11 OS=Saccharomyces cerevisiae (strain ATCC 204508 / S288c) OX=559292 GN=MAK11 PE=1 SV=2	P20484	47	13.005	10.038	15.35	11.463	0.83931	0.85059	6.4607	4.9007	0	0	0	22.956	12.645	15.632
636	Golgi to ER traffic protein 4 OS=Saccharomyces cerevisiae (strain ATCC 204508 / S288c) OX=559292 GN=GET4 PE=1 SV=1	Q12125	36	20.099	23.423	15.35	12.345	0	0	3.2303	3.5005	0	0	0.89679	21.426	20.232	13.227
637	Polyphosphatidylinositol phosphatase INP52 OS=Saccharomyces cerevisiae (strain ATCC 204508 / S288c) OX=559292 GN=INP52 PE=1 SV=1	P50942	133	14.188	13.384	1.0964	6.1726	0	0	0	0.7001	0	0	0	7.652	41.729	30.061
638	Translation machinery-associated protein 64 OS=Saccharomyces cerevisiae (strain ATCC 204508 / S288c) OX=559292 GN=TMA64 PE=1 SV=1	Q04600	64	8.2761	5.0191	13.157	6.1726	0	0	0	0	0	0	0	30.608	32.878	28.858
639	Ribonucleoside-diphosphate reductase large chain 2 OS=Saccharomyces cerevisiae (strain ATCC 204508 / S288c) OX=559292 GN=RNR3 PE=1 SV=4	P21672	98	11.823	0	14.254	10.582	5.0359	0	10.499	9.8014	0	0	0	13.774	0	0
640	Protein HGH1 OS=Saccharomyces cerevisiae (strain ATCC 204508 / S288c) OX=559292 GN=HGH1 PE=1 SV=2	P48362	45	5.9115	1.673	2.1929	1.7636	10.911	9.3565	9.691	7.7011	15.049	12.983	12.555	4.5912	1.2645	3.6073
641	RNA-binding protein SRO9 OS=Saccharomyces cerevisiae (strain ATCC 204508 / S288c) OX=559292 GN=SRO9 PE=1 SV=2	P25567	48	14.188	11.711	14.254	12.345	5.0359	1.7012	2.4227	5.6008	0	1.7311	2.6904	13.774	17.703	19.239
642	Cystathionine gamma-lyase OS=Saccharomyces cerevisiae (strain ATCC 204508 / S288c) OX=559292 GN=CYS3 PE=1 SV=2	P31373	43	11.823	13.384	14.254	8.818	9.2324	5.1035	7.2682	9.8014	0	2.5966	5.3807	9.1825	10.116	7.2146
643	Importin subunit beta-2 OS=Saccharomyces cerevisiae (strain ATCC 204508 / S288c) OX=559292 GN=KAP104 PE=1 SV=1	P38217	104	4.7292	0	6.5786	5.2908	10.911	9.3565	15.344	10.501	6.4495	5.1932	5.3807	19.895	1.2645	6.0121
644	Obg-like ATPase 1 OS=Saccharomyces cerevisiae (strain ATCC 204508 / S288c) OX=559292 GN=OLA1 PE=1 SV=1	P38219	44	21.281	11.711	14.254	9.6997	1.6786	1.7012	0	0.7001	0	6.9243	4.4839	19.895	8.8517	9.6194
645	Proteasome component ECM29 OS=Saccharomyces cerevisiae (strain ATCC 204508 / S288c) OX=559292 GN=ECM29 PE=1 SV=1	P38737	210	4.7292	1.673	15.35	7.0544	6.7145	9.3565	17.767	11.902	1.0749	1.7311	3.5871	6.1216	2.5291	7.2146
646	Adenylate kinase OS=Saccharomyces cerevisiae (strain ATCC 204508 / S288c) OX=559292 GN=ADK1 PE=1 SV=2	P07170	24	13.005	18.403	23.025	12.345	0	0	0	4.9007	0	5.1932	4.4839	13.774	15.174	13.227
647	Alpha-1,2 mannosyltransferase KTR1 OS=Saccharomyces cerevisiae (strain ATCC 204508 / S288c) OX=559292 GN=KTR1 PE=1 SV=1	P27810	46	0	0	0	0	20.983	17.012	10.499	18.203	1.0749	7.7899	9.8647	0	0	1.2024
648	Probable E3 ubiquitin-protein ligase HUL5 OS=Saccharomyces cerevisiae (strain ATCC 204508 / S288c) OX=559292 GN=HUL5 PE=1 SV=1	P53119	106	2.3646	3.3461	12.061	10.582	5.0359	6.8047	4.8455	4.2006	2.1498	0.86554	1.7936	21.426	24.026	20.441
649	Threonine synthase OS=Saccharomyces cerevisiae (strain ATCC 204508 / S288c) OX=559292 GN=THR4 PE=1 SV=1	P16120	57	10.641	13.384	20.832	15.872	1.6786	0	0.80758	0.7001	0	2.5966	1.7936	22.956	16.439	13.227
650	Protein LTV1 OS=Saccharomyces cerevisiae (strain ATCC 204508 / S288c) OX=559292 GN=LTV1 PE=1 SV=2	P34078	53	4.7292	0	0	0	4.1966	2.5518	4.8455	2.8004	38.697	25.101	22.42	0	0	0
651	IMP-specific 5'-nucleotidase 1 OS=Saccharomyces cerevisiae (strain ATCC 204508 / S288c) OX=559292 GN=ISN1 PE=1 SV=1	Q99312	51	0	0	0	0	8.3931	9.3565	15.344	8.4012	18.274	19.042	16.142	0	0	0
652	SVP1-like protein 2 OS=Saccharomyces cerevisiae (strain ATCC 204508 / S288c) OX=559292 GN=HSV2 PE=1 SV=1	P50079	51	13.005	15.057	17.543	10.582	0	0	0	0	0	0	0	12.243	20.232	15.632
653	60S ribosomal protein L27-A OS=Saccharomyces cerevisiae (strain ATCC 204508 / S288c) OX=559292 GN=RPL27A PE=1 SV=1	P0C2H6	16	5.9115	11.711	7.675	4.409	3.3572	0.85059	6.4607	4.2006	12.899	12.118	12.555	10.713	11.381	9.6194
654	DNA mismatch repair protein MSH2 OS=Saccharomyces cerevisiae (strain ATCC 204508 / S288c) OX=559292 GN=MSH2 PE=1 SV=2	P25847	109	4.7292	1.673	13.157	10.582	8.3931	14.46	12.921	12.602	3.2247	4.3277	2.6904	0	2.5291	1.2024
655	Protein phosphatase 1 regulatory subunit SDS22 OS=Saccharomyces cerevisiae (strain ATCC 204508 / S288c) OX=559292 GN=SDS22 PE=1 SV=1	P36047	39	14.188	11.711	1.0964	8.818	10.072	9.3565	12.114	8.4012	1.0749	0.86554	0	3.0608	13.91	10.822
656	Aminopeptidase 2, mitochondrial OS=Saccharomyces cerevisiae (strain ATCC 204508 / S288c) OX=559292 GN=APE2 PE=1 SV=4	P32454	108	14.188	11.711	23.025	15.872	1.6786	1.7012	2.4227	4.9007	2.1498	0	0.89679	10.713	15.174	7.2146
657	DNA-directed RNA polymerase II subunit RPB3 OS=Saccharomyces cerevisiae (strain ATCC 204508 / S288c) OX=559292 GN=RPB3 PE=1 SV=2	P16370	35	1.1823	0	4.3857	1.7636	13.429	15.311	14.536	11.202	10.749	7.7899	8.9679	1.5304	0	6.0121
658	CRAL-TRIO domain-containing protein YKL091C OS=Saccharomyces cerevisiae (strain ATCC 204508 / S288c) OX=559292 GN=YKL091C PE=1 SV=2	P33324	36	17.734	15.057	16.446	12.345	0.83931	0	0	0.7001	0	0	0	26.017	24.026	18.036
659	Ubiquitin carboxyl-terminal hydrolase 1 OS=Saccharomyces cerevisiae (strain ATCC 204508 / S288c) OX=559292 GN=UBP1 PE=1 SV=2	P25037	93	0	0	1.0964	0	8.3931	9.3565	16.152	8.4012	20.423	13.849	16.142	0	0	0
660	DNA-(apurinic or apyrimidinic site) lyase 1 OS=Saccharomyces cerevisiae (strain ATCC 204508 / S288c) OX=559292 GN=APN1 PE=1 SV=4	P22936	41	21.281	20.076	14.254	14.109	0	0	0	0	0	0	0	18.365	22.761	20.441
661	Cell division control protein 24 OS=Saccharomyces cerevisiae (strain ATCC 204508 / S288c) OX=559292 GN=CDC24 PE=1 SV=2	P11433	97	15.37	3.3461	10.964	20.281	0.83931	1.7012	0.80758	1.4002	0	1.7311	0.89679	15.304	12.645	27.656
662	60S ribosomal protein L14-A OS=Saccharomyces cerevisiae (strain ATCC 204508 / S288c) OX=559292 GN=RPL14A PE=1 SV=1	P36105	15	9.4584	10.038	6.5786	5.2908	0.83931	0.85059	0.80758	0	8.5993	14.714	12.555	10.713	13.91	8.417
663	Styryl dye vacuolar localization protein 3 OS=Saccharomyces cerevisiae (strain ATCC 204508 / S288c) OX=559292 GN=SVL3 PE=1 SV=1	Q03088	92	17.734	20.076	3.2893	19.399	0	1.7012	0.80758	2.1003	0	0	0	12.243	20.232	15.632
664	Long-chain-fatty-acid--CoA ligase 1 OS=Saccharomyces cerevisiae (strain ATCC 204508 / S288c) OX=559292 GN=FAA1 PE=1 SV=1	P30624	78	1.1823	0	0	5.2908	18.465	8.5059	18.574	14.002	9.6742	1.7311	3.5871	0	1.2645	0
665	Morphogenesis-related protein MSB1 OS=Saccharomyces cerevisiae (strain ATCC 204508 / S288c) OX=559292 GN=MSB1 PE=1 SV=1	P21339	130	7.0938	6.6921	10.964	12.345	0	0	0	0	0	1.7311	2.6904	13.774	29.084	28.858
666	Guanosine-diphosphatase OS=Saccharomyces cerevisiae (strain ATCC 204508 / S288c) OX=559292 GN=GDA1 PE=1 SV=1	P32621	57	0	0	0	0	20.983	17.862	7.2682	19.603	2.1498	6.9243	10.761	0	0	1.2024
667	SED5-binding protein 3 OS=Saccharomyces cerevisiae (strain ATCC 204508 / S288c) OX=559292 GN=SFB3 PE=1 SV=1	P38810	104	0	0	0	0	10.911	16.161	14.536	11.902	12.899	9.5209	9.8647	0	0	0
668	Adenylosuccinate synthetase OS=Saccharomyces cerevisiae (strain ATCC 204508 / S288c) OX=559292 GN=ADE12 PE=1 SV=3	P80210	48	11.823	10.038	19.736	13.227	0	0.85059	0.80758	1.4002	0	4.3277	2.6904	10.713	13.91	14.429
669	Exosome complex exonuclease DIS3 OS=Saccharomyces cerevisiae (strain ATCC 204508 / S288c) OX=559292 GN=DIS3 PE=1 SV=1	Q08162	114	1.1823	3.3461	0	2.6454	13.429	16.161	23.42	17.502	1.0749	0	0.89679	0	0	1.2024
670	Ubiquitin carboxyl-terminal hydrolase 15 OS=Saccharomyces cerevisiae (strain ATCC 204508 / S288c) OX=559292 GN=UBP15 PE=1 SV=1	P50101	144	0	0	0	0	11.75	16.161	20.997	15.402	6.4495	6.9243	8.9679	0	0	1.2024
671	Kelch repeat-containing protein 3 OS=Saccharomyces cerevisiae (strain ATCC 204508 / S288c) OX=559292 GN=KEL3 PE=1 SV=1	Q08979	75	0	0	0	0	6.7145	11.908	8.8834	4.2006	30.098	16.445	20.626	0	0	0
672	Vacuolar protein sorting-associated protein 5 OS=Saccharomyces cerevisiae (strain ATCC 204508 / S288c) OX=559292 GN=VPS5 PE=1 SV=1	Q92331	76	2.3646	6.6921	3.2893	11.463	5.0359	5.9541	3.2303	8.4012	6.4495	4.3277	4.4839	7.652	12.645	15.632
673	GTP-binding protein YPT1 OS=Saccharomyces cerevisiae (strain ATCC 204508 / S288c) OX=559292 GN=YPT1 PE=1 SV=2	P01123	23	5.9115	6.6921	9.8679	9.6997	7.5538	8.5059	9.691	7.7011	6.4495	3.4622	6.2775	3.0608	7.5872	7.2146
674	Protein IVY1 OS=Saccharomyces cerevisiae (strain ATCC 204508 / S288c) OX=559292 GN=IVY1 PE=1 SV=1	Q04934	50	11.823	3.3461	0	5.2908	4.1966	3.4024	3.2303	3.5005	6.4495	6.9243	5.3807	6.1216	35.407	15.632
675	ARF guanine-nucleotide exchange factor 1 OS=Saccharomyces cerevisiae (strain ATCC 204508 / S288c) OX=559292 GN=GEA1 PE=1 SV=1	P47102	159	4.7292	0	4.3857	10.582	10.072	10.207	9.691	9.8014	1.0749	2.5966	6.2775	4.5912	2.5291	6.0121
676	Nuclear protein STH1/NPS1 OS=Saccharomyces cerevisiae (strain ATCC 204508 / S288c) OX=559292 GN=STH1 PE=1 SV=1	P32597	157	2.3646	1.673	1.0964	7.0544	0	0	8.8834	8.4012	10.749	17.311	16.142	4.5912	0	1.2024
677	Flap endonuclease 1 OS=Saccharomyces cerevisiae (strain ATCC 204508 / S288c) OX=559292 GN=RAD27 PE=1 SV=1	P26793	43	15.37	25.096	14.254	14.109	0	0	0	0	0	0	0	13.774	25.291	19.239
678	Ribosome maturation protein SDO1 OS=Saccharomyces cerevisiae (strain ATCC 204508 / S288c) OX=559292 GN=SDO1 PE=1 SV=1	Q07953	28	18.917	26.769	14.254	9.6997	0	0	0	0	0	0	0	15.304	21.497	19.239
679	Probable mannosyltransferase KTR4 OS=Saccharomyces cerevisiae (strain ATCC 204508 / S288c) OX=559292 GN=KTR4 PE=1 SV=1	P38131	55	0	0	0	0	13.429	16.161	8.8834	14.002	5.3746	12.983	15.245	0	0	0
680	DNA-directed RNA polymerase II subunit RPB11 OS=Saccharomyces cerevisiae (strain ATCC 204508 / S288c) OX=559292 GN=RPB11 PE=1 SV=1	P38902	14	4.7292	5.0191	5.4822	7.0544	7.5538	11.908	10.499	8.4012	6.4495	5.1932	4.4839	3.0608	6.3226	4.8097
681	60S ribosomal protein L8-A OS=Saccharomyces cerevisiae (strain ATCC 204508 / S288c) OX=559292 GN=RPL8A PE=1 SV=4	P17076	28	4.7292	1.673	9.8679	5.2908	1.6786	1.7012	4.0379	3.5005	10.749	12.118	11.658	9.1825	15.174	9.6194
682	Conserved oligomeric Golgi complex subunit 4 OS=Saccharomyces cerevisiae (strain ATCC 204508 / S288c) OX=559292 GN=COG4 PE=1 SV=1	Q06096	99	16.552	5.0191	0	10.582	9.2324	6.8047	9.691	11.202	4.2997	1.7311	3.5871	10.713	0	2.4049
683	Conserved oligomeric Golgi complex subunit 6 OS=Saccharomyces cerevisiae (strain ATCC 204508 / S288c) OX=559292 GN=COG6 PE=1 SV=1	P53959	97	15.37	5.0191	3.2893	13.227	7.5538	7.6553	9.691	9.1013	3.2247	6.0588	4.4839	9.1825	0	0
684	RNA polymerase-associated protein LEO1 OS=Saccharomyces cerevisiae (strain ATCC 204508 / S288c) OX=559292 GN=LEO1 PE=1 SV=1	P38439	54	2.3646	3.3461	1.0964	2.6454	5.8752	8.5059	8.0758	7.7011	17.199	15.58	14.349	3.0608	1.2645	1.2024
685	Fumarate hydratase, mitochondrial OS=Saccharomyces cerevisiae (strain ATCC 204508 / S288c) OX=559292 GN=FUM1 PE=1 SV=2	P08417	53	20.099	15.057	12.061	11.463	5.0359	2.5518	0.80758	2.1003	0	0.86554	1.7936	10.713	10.116	12.024
686	ATP-dependent RNA helicase ROK1 OS=Saccharomyces cerevisiae (strain ATCC 204508 / S288c) OX=559292 GN=ROK1 PE=1 SV=1	P45818	64	8.2761	13.384	9.8679	11.463	1.6786	2.5518	0	0.7001	8.5993	6.9243	3.5871	21.426	12.645	16.834
687	60S ribosomal protein L33-A OS=Saccharomyces cerevisiae (strain ATCC 204508 / S288c) OX=559292 GN=RPL33A PE=1 SV=3	P05744	12	5.9115	5.0191	2.1929	3.5272	0	2.5518	4.0379	2.1003	9.6742	18.176	13.452	6.1216	5.0581	3.6073
688	Uncharacterized protein YOL098C OS=Saccharomyces cerevisiae (strain ATCC 204508 / S288c) OX=559292 GN=YOL098C PE=1 SV=1	Q12496	118	2.3646	0	1.0964	2.6454	16.786	17.862	10.499	12.602	8.5993	4.3277	0.89679	0	2.5291	3.6073
689	Chromatin structure-remodeling complex subunit RSC9 OS=Saccharomyces cerevisiae (strain ATCC 204508 / S288c) OX=559292 GN=RSC9 PE=1 SV=1	Q03124	65	8.2761	3.3461	21.929	14.109	1.6786	1.7012	4.0379	3.5005	4.2997	5.1932	3.5871	7.652	5.0581	4.8097
690	AP-3 complex subunit delta OS=Saccharomyces cerevisiae (strain ATCC 204508 / S288c) OX=559292 GN=APL5 PE=1 SV=1	Q08951	107	1.1823	0	3.2893	12.345	7.5538	9.3565	8.8834	10.501	11.824	7.7899	9.8647	0	2.5291	3.6073
691	Histone deacetylase RPD3 OS=Saccharomyces cerevisiae (strain ATCC 204508 / S288c) OX=559292 GN=RPD3 PE=1 SV=1	P32561	49	1.1823	0	4.3857	5.2908	8.3931	8.5059	15.344	9.1013	11.824	6.9243	10.761	0	0	1.2024
692	DNA-directed RNA polymerase III subunit RPC4 OS=Saccharomyces cerevisiae (strain ATCC 204508 / S288c) OX=559292 GN=RPC53 PE=1 SV=2	P25441	47	0	0	2.1929	0	4.1966	7.6553	8.0758	7.7011	19.348	19.042	18.833	0	0	0
693	Uncharacterized protein YOR093C OS=Saccharomyces cerevisiae (strain ATCC 204508 / S288c) OX=559292 GN=YOR093C PE=1 SV=1	Q12275	187	1.1823	0	32.893	0	0	0	0	0	1.0749	5.1932	2.6904	0	53.11	18.036
694	Transcription elongation factor S-II OS=Saccharomyces cerevisiae (strain ATCC 204508 / S288c) OX=559292 GN=DST1 PE=1 SV=4	P07273	35	17.734	21.749	12.061	7.0544	0	0	0	0	0	0	0	16.834	25.291	15.632
695	Mannan polymerase complexes subunit MNN9 OS=Saccharomyces cerevisiae (strain ATCC 204508 / S288c) OX=559292 GN=MNN9 PE=1 SV=3	P39107	46	0	0	0	0	11.75	12.759	4.0379	5.6008	18.274	19.042	17.039	0	0	0
696	Signal recognition particle subunit SEC65 OS=Saccharomyces cerevisiae (strain ATCC 204508 / S288c) OX=559292 GN=SEC65 PE=1 SV=1	P29478	31	2.3646	1.673	1.0964	7.0544	5.0359	3.4024	1.6152	7.001	0	20.773	17.936	1.5304	5.0581	2.4049
697	Serine hydroxymethyltransferase, mitochondrial OS=Saccharomyces cerevisiae (strain ATCC 204508 / S288c) OX=559292 GN=SHM1 PE=1 SV=2	P37292	54	20.099	16.73	17.543	11.463	3.3572	2.5518	1.6152	3.5005	0	0	0	7.652	13.91	9.6194
698	Oxysterol-binding protein homolog 1 OS=Saccharomyces cerevisiae (strain ATCC 204508 / S288c) OX=559292 GN=SWH1 PE=1 SV=4	P35845	135	1.1823	0	0	1.7636	12.59	19.564	7.2682	14.702	6.4495	6.0588	8.9679	1.5304	0	0
699	DNA-directed RNA polymerase I subunit RPA34 OS=Saccharomyces cerevisiae (strain ATCC 204508 / S288c) OX=559292 GN=RPA34 PE=1 SV=1	P47006	27	5.9115	1.673	4.3857	2.6454	0.83931	5.1035	4.8455	3.5005	16.124	12.983	12.555	15.304	8.8517	8.417
700	Epsin-3 OS=Saccharomyces cerevisiae (strain ATCC 204508 / S288c) OX=559292 GN=ENT3 PE=1 SV=1	P47160	45	8.2761	1.673	8.7714	12.345	10.072	11.058	4.8455	9.8014	2.1498	2.5966	2.6904	9.1825	3.7936	1.2024
701	Calmodulin OS=Saccharomyces cerevisiae (strain ATCC 204508 / S288c) OX=559292 GN=CMD1 PE=1 SV=1	P06787	16	10.641	1.673	12.061	6.1726	8.3931	4.253	13.729	11.902	1.0749	5.1932	8.9679	1.5304	5.0581	6.0121
702	60S ribosomal protein L13-A OS=Saccharomyces cerevisiae (strain ATCC 204508 / S288c) OX=559292 GN=RPL13A PE=1 SV=1	Q12690	23	3.5469	3.3461	1.0964	1.7636	0	3.4024	2.4227	2.8004	18.274	16.445	14.349	4.5912	7.5872	8.417
703	Protein BCP1 OS=Saccharomyces cerevisiae (strain ATCC 204508 / S288c) OX=559292 GN=BCP1 PE=1 SV=1	Q06338	33	1.1823	1.673	1.0964	0.8818	7.5538	10.207	8.8834	4.9007	17.199	13.849	12.555	0	0	0
704	GTP cyclohydrolase 1 OS=Saccharomyces cerevisiae (strain ATCC 204508 / S288c) OX=559292 GN=FOL2 PE=1 SV=1	P51601	28	0	0	1.0964	4.409	19.304	22.115	16.152	16.102	0	0	0	0	0	1.2024
705	THO complex subunit MFT1 OS=Saccharomyces cerevisiae (strain ATCC 204508 / S288c) OX=559292 GN=MFT1 PE=1 SV=1	P33441	45	0	0	0	0	3.3572	4.253	11.306	6.3009	25.798	20.773	17.039	0	0	0
706	Phosphoserine aminotransferase OS=Saccharomyces cerevisiae (strain ATCC 204508 / S288c) OX=559292 GN=SER1 PE=1 SV=1	P33330	43	13.005	6.6921	13.157	9.6997	4.1966	0.85059	1.6152	9.1013	0	1.7311	1.7936	10.713	17.703	12.024
707	SED5-binding protein 2 OS=Saccharomyces cerevisiae (strain ATCC 204508 / S288c) OX=559292 GN=SFB2 PE=1 SV=1	P53953	99	1.1823	0	5.4822	4.409	5.0359	7.6553	8.8834	5.6008	20.423	12.118	15.245	0	0	2.4049
708	Serine/threonine protein kinase KIN1 OS=Saccharomyces cerevisiae (strain ATCC 204508 / S288c) OX=559292 GN=KIN1 PE=1 SV=3	P13185	120	30.74	8.3652	0	26.454	0.83931	0	0	0	0	0	0	4.5912	2.5291	26.453
709	Protein transport protein SEC1 OS=Saccharomyces cerevisiae (strain ATCC 204508 / S288c) OX=559292 GN=SEC1 PE=1 SV=1	P30619	83	15.37	13.384	0	13.227	0	0	0	0	0	0	0	19.895	24.026	26.453
710	Exocyst complex component EXO70 OS=Saccharomyces cerevisiae (strain ATCC 204508 / S288c) OX=559292 GN=EXO70 PE=1 SV=1	P19658	71	8.2761	3.3461	3.2893	6.1726	6.7145	5.1035	9.691	8.4012	5.3746	5.1932	8.0711	1.5304	2.5291	7.2146
711	Cys-Gly metallodipeptidase DUG1 OS=Saccharomyces cerevisiae (strain ATCC 204508 / S288c) OX=559292 GN=DUG1 PE=1 SV=1	P43616	53	8.2761	13.384	10.964	7.9362	6.7145	0	4.8455	3.5005	3.2247	1.7311	2.6904	10.713	11.381	9.6194
712	Protein MUK1 OS=Saccharomyces cerevisiae (strain ATCC 204508 / S288c) OX=559292 GN=MUK1 PE=1 SV=1	Q02866	70	4.7292	1.673	0	11.463	6.7145	11.058	2.4227	10.501	3.2247	12.118	7.1743	3.0608	2.5291	6.0121
713	Protein LSM12 OS=Saccharomyces cerevisiae (strain ATCC 204508 / S288c) OX=559292 GN=LSM12 PE=1 SV=1	P38828	21	10.641	11.711	8.7714	9.6997	0	0.85059	0	1.4002	2.1498	6.0588	2.6904	19.895	21.497	12.024
714	Transcriptional modulator WTM2 OS=Saccharomyces cerevisiae (strain ATCC 204508 / S288c) OX=559292 GN=WTM2 PE=1 SV=1	Q12206	52	1.1823	0	1.0964	0.8818	14.268	18.713	15.344	10.501	8.5993	3.4622	1.7936	0	0	4.8097
715	Suppressor of glycerol defect protein 1 OS=Saccharomyces cerevisiae (strain ATCC 204508 / S288c) OX=559292 GN=SGD1 PE=1 SV=1	Q06132	103	2.3646	1.673	12.061	13.227	0	0	4.0379	1.4002	17.199	17.311	12.555	0	0	4.8097
716	Delta-aminolevulinic acid dehydratase OS=Saccharomyces cerevisiae (strain ATCC 204508 / S288c) OX=559292 GN=HEM2 PE=1 SV=2	P05373	38	4.7292	1.673	4.3857	2.6454	18.465	17.862	14.536	12.602	0	0	0	4.5912	2.5291	2.4049
717	Nucleolar complex protein 2 OS=Saccharomyces cerevisiae (strain ATCC 204508 / S288c) OX=559292 GN=NOC2 PE=1 SV=2	P39744	82	0	0	0	0	0.83931	0	4.0379	1.4002	30.098	22.504	26.007	0	0	0
718	Ribosome biogenesis protein SSF1 OS=Saccharomyces cerevisiae (strain ATCC 204508 / S288c) OX=559292 GN=SSF1 PE=1 SV=1	P38789	52	3.5469	0	1.0964	1.7636	0.83931	1.7012	3.2303	2.8004	25.798	23.37	20.626	0	2.5291	1.2024
719	Zinc finger protein ZPR1 OS=Saccharomyces cerevisiae (strain ATCC 204508 / S288c) OX=559292 GN=ZPR1 PE=1 SV=1	P53303	55	2.3646	0	4.3857	2.6454	15.108	14.46	16.152	12.602	0	0.86554	0.89679	9.1825	0	0
720	Putative metallophosphoesterase YNL217W OS=Saccharomyces cerevisiae (strain ATCC 204508 / S288c) OX=559292 GN=YNL217W PE=1 SV=1	P40152	37	15.37	11.711	12.061	6.1726	0	0	0	1.4002	0	0	0.89679	13.774	16.439	20.441
721	Chromatin structure-remodeling complex protein RSC8 OS=Saccharomyces cerevisiae (strain ATCC 204508 / S288c) OX=559292 GN=RSC8 PE=1 SV=1	P43609	63	0	0	0	3.5272	5.8752	4.253	13.729	11.902	7.5244	16.445	10.761	7.652	0	0
722	Uncharacterized protein YOR296W OS=Saccharomyces cerevisiae (strain ATCC 204508 / S288c) OX=559292 GN=YOR296W PE=1 SV=1	Q08748	147	0	1.673	19.736	9.6997	0	0	0	0	0	0	0	6.1216	32.878	27.656
723	Ras-related protein SEC4 OS=Saccharomyces cerevisiae (strain ATCC 204508 / S288c) OX=559292 GN=SEC4 PE=1 SV=1	P07560	24	11.823	1.673	12.061	6.1726	5.8752	2.5518	8.8834	9.1013	3.2247	3.4622	6.2775	3.0608	5.0581	8.417
724	Mitogen-activated protein kinase HOG1 OS=Saccharomyces cerevisiae (strain ATCC 204508 / S288c) OX=559292 GN=HOG1 PE=1 SV=2	P32485	49	9.4584	3.3461	5.4822	3.5272	6.7145	7.6553	4.0379	8.4012	1.0749	2.5966	1.7936	27.547	7.5872	8.417
725	Ankyrin repeat-containing protein YGL242C OS=Saccharomyces cerevisiae (strain ATCC 204508 / S288c) OX=559292 GN=YGL242C PE=1 SV=1	P53066	20	1.1823	1.673	2.1929	1.7636	8.3931	10.207	10.499	7.7011	15.049	13.849	10.761	0	2.5291	1.2024
726	Nucleoporin NUP157 OS=Saccharomyces cerevisiae (strain ATCC 204508 / S288c) OX=559292 GN=NUP157 PE=1 SV=1	P40064	157	28.375	6.6921	17.543	19.399	0.83931	0.85059	1.6152	0.7001	0	1.7311	1.7936	3.0608	3.7936	7.2146
727	Tyrosine--tRNA ligase, cytoplasmic OS=Saccharomyces cerevisiae (strain ATCC 204508 / S288c) OX=559292 GN=TYS1 PE=1 SV=3	P36421	44	7.0938	10.038	18.639	7.9362	2.5179	1.7012	1.6152	0.7001	0	2.5966	2.6904	18.365	12.645	9.6194
728	ATP-dependent rRNA helicase SPB4 OS=Saccharomyces cerevisiae (strain ATCC 204508 / S288c) OX=559292 GN=SPB4 PE=1 SV=1	P25808	69	14.188	5.0191	13.157	14.991	0	0	0	0	1.0749	0.86554	2.6904	4.5912	17.703	14.429
729	Bromodomain-containing factor 1 OS=Saccharomyces cerevisiae (strain ATCC 204508 / S288c) OX=559292 GN=BDF1 PE=1 SV=3	P35817	77	0	0	5.4822	0.8818	0	0.85059	3.2303	3.5005	25.798	18.176	17.936	0	5.0581	0
730	Actin-interacting protein 1 OS=Saccharomyces cerevisiae (strain ATCC 204508 / S288c) OX=559292 GN=AIP1 PE=1 SV=1	P46680	67	0	1.673	2.1929	0	19.304	11.058	12.114	23.803	0	0	0	0	1.2645	12.024
731	Protein PEA2 OS=Saccharomyces cerevisiae (strain ATCC 204508 / S288c) OX=559292 GN=PEA2 PE=1 SV=1	P40091	48	2.3646	0	9.8679	7.0544	6.7145	5.9541	8.0758	7.7011	4.2997	3.4622	4.4839	10.713	11.381	9.6194
732	Actin-related protein 3 OS=Saccharomyces cerevisiae (strain ATCC 204508 / S288c) OX=559292 GN=ARP3 PE=1 SV=1	P47117	50	14.188	3.3461	13.157	11.463	10.072	5.1035	7.2682	11.902	0	0	0	0	5.0581	1.2024
733	Prolyl 3,4-dihydroxylase TPA1 OS=Saccharomyces cerevisiae (strain ATCC 204508 / S288c) OX=559292 GN=TPA1 PE=1 SV=1	P40032	74	0	0	4.3857	0.8818	14.268	23.817	10.499	11.202	6.4495	1.7311	0	0	0	0
734	60S ribosomal protein L12-A OS=Saccharomyces cerevisiae (strain ATCC 204508 / S288c) OX=559292 GN=RPL12A PE=1 SV=1	P0CX53	18	11.823	10.038	6.5786	9.6997	1.6786	1.7012	3.2303	2.8004	7.5244	8.6554	8.9679	12.243	7.5872	7.2146
735	26S proteasome regulatory subunit RPN10 OS=Saccharomyces cerevisiae (strain ATCC 204508 / S288c) OX=559292 GN=RPN10 PE=1 SV=3	P38886	30	2.3646	0	2.1929	3.5272	13.429	14.46	8.8834	8.4012	5.3746	6.9243	5.3807	4.5912	2.5291	4.8097
736	Transcription initiation factor IIE subunit beta OS=Saccharomyces cerevisiae (strain ATCC 204508 / S288c) OX=559292 GN=TFA2 PE=1 SV=3	P36145	37	1.1823	1.673	19.736	2.6454	6.7145	5.1035	4.0379	6.3009	11.824	14.714	10.761	0	1.2645	1.2024
737	60S acidic ribosomal protein P2-beta OS=Saccharomyces cerevisiae (strain ATCC 204508 / S288c) OX=559292 GN=RPP2B PE=1 SV=2	P02400	11	4.7292	3.3461	7.675	5.2908	1.6786	0	8.0758	4.9007	20.423	13.849	13.452	3.0608	2.5291	2.4049
738	DNA topoisomerase 2 OS=Saccharomyces cerevisiae (strain ATCC 204508 / S288c) OX=559292 GN=TOP2 PE=1 SV=2	P06786	164	1.1823	0	3.2893	1.7636	0.83931	0	9.691	0	19.348	18.176	20.626	0	5.0581	2.4049
739	Pre-rRNA-processing protein ESF1 OS=Saccharomyces cerevisiae (strain ATCC 204508 / S288c) OX=559292 GN=ESF1 PE=1 SV=1	Q06344	72	0	0	5.4822	4.409	0.83931	3.4024	8.0758	5.6008	20.423	15.58	16.142	0	0	1.2024
740	Nuclear polyadenylated RNA-binding protein 3 OS=Saccharomyces cerevisiae (strain ATCC 204508 / S288c) OX=559292 GN=NAB3 PE=1 SV=1	P38996	90	0	0	0	1.7636	5.8752	2.5518	4.8455	4.9007	32.247	17.311	17.039	1.5304	0	0
741	Tyrosine-protein phosphatase 3 OS=Saccharomyces cerevisiae (strain ATCC 204508 / S288c) OX=559292 GN=PTP3 PE=1 SV=2	P40048	105	20.099	11.711	2.1929	22.927	0	0.85059	0	0	0	0	0	6.1216	8.8517	18.036
742	Hsp90 co-chaperone AHA1 OS=Saccharomyces cerevisiae (strain ATCC 204508 / S288c) OX=559292 GN=AHA1 PE=1 SV=1	Q12449	39	11.823	8.3652	8.7714	13.227	0.83931	0.85059	2.4227	2.8004	0	0.86554	0	35.199	7.5872	15.632
743	Actin-related protein 2/3 complex subunit 2 OS=Saccharomyces cerevisiae (strain ATCC 204508 / S288c) OX=559292 GN=ARC35 PE=1 SV=1	P53731	40	8.2761	1.673	8.7714	12.345	9.2324	6.8047	8.8834	9.8014	0	0.86554	0	3.0608	6.3226	9.6194
744	Ubiquitin-like protein MDY2 OS=Saccharomyces cerevisiae (strain ATCC 204508 / S288c) OX=559292 GN=MDY2 PE=1 SV=1	Q12285	24	15.37	20.076	13.157	7.9362	5.8752	5.1035	4.0379	3.5005	0	0	0	13.774	11.381	8.417
745	Serine/threonine-protein kinase CBK1 OS=Saccharomyces cerevisiae (strain ATCC 204508 / S288c) OX=559292 GN=CBK1 PE=1 SV=1	P53894	87	13.005	20.076	4.3857	10.582	0	0.85059	0	0.7001	0	0.86554	1.7936	13.774	21.497	15.632
746	Chromo domain-containing protein 1 OS=Saccharomyces cerevisiae (strain ATCC 204508 / S288c) OX=559292 GN=CHD1 PE=1 SV=1	P32657	168	0	0	1.0964	0	2.5179	1.7012	2.4227	2.1003	32.247	19.907	18.833	0	0	1.2024
747	U3 small nucleolar ribonucleoprotein protein LCP5 OS=Saccharomyces cerevisiae (strain ATCC 204508 / S288c) OX=559292 GN=LCP5 PE=1 SV=1	P40079	41	0	0	0	0	0.83931	4.253	6.4607	2.8004	24.723	20.773	20.626	0	0	1.2024
748	Heat shock protein 26 OS=Saccharomyces cerevisiae (strain ATCC 204508 / S288c) OX=559292 GN=HSP26 PE=1 SV=3	P15992	24	5.9115	3.3461	5.4822	4.409	5.0359	5.1035	12.114	9.1013	2.1498	6.0588	7.1743	4.5912	5.0581	6.0121
749	60S ribosomal protein L33-B OS=Saccharomyces cerevisiae (strain ATCC 204508 / S288c) OX=559292 GN=RPL33B PE=1 SV=2	P41056	12	5.9115	1.673	2.1929	3.5272	1.6786	0.85059	3.2303	2.8004	8.5993	13.849	10.761	4.5912	5.0581	4.8097
750	Saccharopepsin OS=Saccharomyces cerevisiae (strain ATCC 204508 / S288c) OX=559292 GN=PEP4 PE=1 SV=1	P07267	45	3.5469	1.673	2.1929	2.6454	8.3931	11.058	12.114	14.002	4.2997	0.86554	2.6904	4.5912	5.0581	3.6073
751	mRNA-binding protein PUF3 OS=Saccharomyces cerevisiae (strain ATCC 204508 / S288c) OX=559292 GN=PUF3 PE=1 SV=1	Q07807	98	10.641	6.6921	0	11.463	3.3572	5.1035	0	7.001	8.5993	11.252	8.9679	1.5304	3.7936	4.8097
752	Gamma-glutamyl phosphate reductase OS=Saccharomyces cerevisiae (strain ATCC 204508 / S288c) OX=559292 GN=PRO2 PE=1 SV=1	P54885	50	3.5469	6.6921	12.061	8.818	6.7145	2.5518	8.8834	11.902	0	0	1.7936	9.1825	7.5872	8.417
753	Mitochondrial outer membrane protein porin 1 OS=Saccharomyces cerevisiae (strain ATCC 204508 / S288c) OX=559292 GN=POR1 PE=1 SV=4	P04840	30	4.7292	0	3.2893	4.409	11.75	5.9541	5.6531	13.302	1.0749	12.983	12.555	0	1.2645	1.2024
754	ER-derived vesicles protein ERV46 OS=Saccharomyces cerevisiae (strain ATCC 204508 / S288c) OX=559292 GN=ERV46 PE=1 SV=2	P39727	46	0	0	0	0	13.429	11.908	4.0379	8.4012	6.4495	17.311	12.555	0	0	0
755	Pheromone-processing carboxypeptidase KEX1 OS=Saccharomyces cerevisiae (strain ATCC 204508 / S288c) OX=559292 GN=KEX1 PE=1 SV=1	P09620	82	0	0	0	0	10.072	6.8047	4.0379	11.902	7.5244	15.58	15.245	0	0	0
756	Histone H4 OS=Saccharomyces cerevisiae (strain ATCC 204508 / S288c) OX=559292 GN=HHF1 PE=1 SV=2	P02309	11	5.9115	5.0191	4.3857	3.5272	2.5179	4.253	6.4607	3.5005	16.124	13.849	11.658	3.0608	5.0581	2.4049
757	Serine/threonine-protein kinase PSK2 OS=Saccharomyces cerevisiae (strain ATCC 204508 / S288c) OX=559292 GN=PSK2 PE=1 SV=1	Q08217	124	8.2761	0	9.8679	3.5272	8.3931	9.3565	4.0379	11.202	1.0749	0.86554	3.5871	15.304	1.2645	4.8097
758	Stress protein DDR48 OS=Saccharomyces cerevisiae (strain ATCC 204508 / S288c) OX=559292 GN=DDR48 PE=1 SV=4	P18899	46	1.1823	1.673	5.4822	3.5272	11.75	7.6553	20.19	18.203	1.0749	0	0.89679	0	1.2645	1.2024
759	60S ribosomal protein L18-A OS=Saccharomyces cerevisiae (strain ATCC 204508 / S288c) OX=559292 GN=RPL18A PE=1 SV=1	P0CX49	21	3.5469	3.3461	0	0.8818	0.83931	1.7012	2.4227	0.7001	11.824	24.235	23.316	0	0	1.2024
760	tRNA (guanosine(18)-2'-O)-methyltransferase OS=Saccharomyces cerevisiae (strain ATCC 204508 / S288c) OX=559292 GN=TRM3 PE=1 SV=1	Q07527	165	1.1823	1.673	6.5786	2.6454	15.947	20.414	11.306	11.202	0	0.86554	0.89679	0	0	0
761	SCF E3 ubiquitin ligase complex F-box protein GRR1 OS=Saccharomyces cerevisiae (strain ATCC 204508 / S288c) OX=559292 GN=GRR1 PE=1 SV=1	P24814	133	5.9115	0	7.675	34.39	0.83931	4.253	0.80758	2.1003	0	0	0	1.5304	0	24.049
762	Bud site selection protein 6 OS=Saccharomyces cerevisiae (strain ATCC 204508 / S288c) OX=559292 GN=BUD6 PE=1 SV=1	P41697	89	1.1823	0	1.0964	33.508	13.429	8.5059	0.80758	11.902	0	0	0	6.1216	0	0
763	mRNA export factor MEX67 OS=Saccharomyces cerevisiae (strain ATCC 204508 / S288c) OX=559292 GN=MEX67 PE=1 SV=1	Q99257	67	17.734	25.096	16.446	10.582	0	0	0	0	0	0.86554	0	7.652	13.91	8.417
764	ATP-dependent RNA helicase FAL1 OS=Saccharomyces cerevisiae (strain ATCC 204508 / S288c) OX=559292 GN=FAL1 PE=1 SV=1	Q12099	45	14.188	18.403	9.8679	12.345	0	0	0	0	0	0	0	12.243	17.703	14.429
765	40S ribosomal protein S25-A OS=Saccharomyces cerevisiae (strain ATCC 204508 / S288c) OX=559292 GN=RPS25A PE=1 SV=1	Q3E792	12	5.9115	3.3461	6.5786	4.409	1.6786	1.7012	3.2303	2.1003	4.2997	12.118	12.555	9.1825	8.8517	6.0121
766	Transcription initiation factor TFIID subunit 5 OS=Saccharomyces cerevisiae (strain ATCC 204508 / S288c) OX=559292 GN=TAF5 PE=1 SV=1	P38129	89	2.3646	1.673	0	14.991	1.6786	2.5518	4.8455	7.7011	11.824	13.849	14.349	3.0608	1.2645	0
767	Protein SMY2 OS=Saccharomyces cerevisiae (strain ATCC 204508 / S288c) OX=559292 GN=SMY2 PE=1 SV=2	P32909	81	20.099	6.6921	1.0964	25.572	0	0.85059	0	2.8004	1.0749	3.4622	5.3807	12.243	6.3226	2.4049
768	rRNA 2'-O-methyltransferase fibrillarin OS=Saccharomyces cerevisiae (strain ATCC 204508 / S288c) OX=559292 GN=NOP1 PE=1 SV=1	P15646	34	2.3646	0	12.061	1.7636	0	0	7.2682	0	12.899	14.714	13.452	9.1825	7.5872	6.0121
769	GTP-binding protein YPT7 OS=Saccharomyces cerevisiae (strain ATCC 204508 / S288c) OX=559292 GN=YPT7 PE=1 SV=1	P32939	23	11.823	6.6921	9.8679	5.2908	5.0359	5.1035	7.2682	7.001	3.2247	3.4622	3.5871	1.5304	13.91	8.417
770	D-2-hydroxyglutarate--pyruvate transhydrogenase DLD3 OS=Saccharomyces cerevisiae (strain ATCC 204508 / S288c) OX=559292 GN=DLD3 PE=1 SV=1	P39976	55	10.641	15.057	9.8679	10.582	3.3572	0.85059	4.0379	1.4002	6.4495	2.5966	3.5871	16.834	11.381	6.0121
771	Nucleolar protein 3 OS=Saccharomyces cerevisiae (strain ATCC 204508 / S288c) OX=559292 GN=NPL3 PE=1 SV=1	Q01560	45	2.3646	1.673	6.5786	3.5272	13.429	13.609	10.499	8.4012	0	2.5966	1.7936	1.5304	3.7936	8.417
772	GLC7-interacting protein 3 OS=Saccharomyces cerevisiae (strain ATCC 204508 / S288c) OX=559292 GN=GIP3 PE=1 SV=1	Q03016	141	14.188	6.6921	17.543	15.872	4.1966	1.7012	2.4227	4.2006	0	0.86554	0	1.5304	7.5872	9.6194
773	5'-AMP-activated protein kinase subunit gamma OS=Saccharomyces cerevisiae (strain ATCC 204508 / S288c) OX=559292 GN=SNF4 PE=1 SV=1	P12904	36	1.1823	0	4.3857	2.6454	9.2324	9.3565	12.114	13.302	9.6742	2.5966	4.4839	1.5304	0	3.6073
774	Myosin-5 OS=Saccharomyces cerevisiae (strain ATCC 204508 / S288c) OX=559292 GN=MYO5 PE=1 SV=1	Q04439	137	1.1823	0	6.5786	0	11.75	6.8047	0.80758	10.501	3.2247	12.983	22.42	0	0	1.2024
775	Regulator of Ty1 transposition protein 107 OS=Saccharomyces cerevisiae (strain ATCC 204508 / S288c) OX=559292 GN=RTT107 PE=1 SV=1	P38850	123	17.734	25.096	9.8679	11.463	0.83931	0.85059	0.80758	0	0	0	0	4.5912	29.084	8.417
776	Vacuolar protein sorting-associated protein 29 OS=Saccharomyces cerevisiae (strain ATCC 204508 / S288c) OX=559292 GN=VPS29 PE=1 SV=1	P38759	31	2.3646	1.673	3.2893	1.7636	5.8752	8.5059	5.6531	4.9007	8.5993	8.6554	9.8647	6.1216	5.0581	4.8097
777	Protein CFT1 OS=Saccharomyces cerevisiae (strain ATCC 204508 / S288c) OX=559292 GN=CFT1 PE=1 SV=1	Q06632	153	1.1823	1.673	4.3857	3.5272	3.3572	8.5059	12.114	11.902	6.4495	6.9243	5.3807	1.5304	3.7936	2.4049
778	Dihydrolipoyllysine-residue acetyltransferase component of pyruvate dehydrogenase complex, mitochondrial OS=Saccharomyces cerevisiae (strain ATCC 204508 / S288c) OX=559292 GN=LAT1 PE=1 SV=1	P12695	52	7.0938	0	2.1929	5.2908	4.1966	4.253	3.2303	6.3009	1.0749	18.176	20.626	3.0608	0	1.2024
779	Glutamine--tRNA ligase OS=Saccharomyces cerevisiae (strain ATCC 204508 / S288c) OX=559292 GN=GLN4 PE=1 SV=2	P13188	93	9.4584	6.6921	19.736	13.227	1.6786	0	0.80758	2.1003	0	1.7311	2.6904	9.1825	10.116	7.2146
780	Branched-chain-amino-acid aminotransferase, mitochondrial OS=Saccharomyces cerevisiae (strain ATCC 204508 / S288c) OX=559292 GN=BAT1 PE=1 SV=1	P38891	44	15.37	16.73	17.543	14.109	0.83931	0.85059	1.6152	2.8004	0	0	1.7936	7.652	13.91	8.417
781	Antiviral helicase SKI2 OS=Saccharomyces cerevisiae (strain ATCC 204508 / S288c) OX=559292 GN=SKI2 PE=1 SV=2	P35207	146	3.5469	0	4.3857	2.6454	4.1966	9.3565	6.4607	2.8004	8.5993	12.983	15.245	0	1.2645	1.2024
782	Conserved oligomeric Golgi complex subunit 8 OS=Saccharomyces cerevisiae (strain ATCC 204508 / S288c) OX=559292 GN=COG8 PE=1 SV=1	Q04632	70	11.823	0	3.2893	14.991	5.0359	11.058	6.4607	7.001	1.0749	5.1932	8.0711	6.1216	0	0
783	Actin-related protein 2/3 complex subunit 1 OS=Saccharomyces cerevisiae (strain ATCC 204508 / S288c) OX=559292 GN=ARC40 PE=1 SV=1	P38328	42	9.4584	3.3461	13.157	8.818	6.7145	2.5518	7.2682	7.001	0	0	0	9.1825	10.116	6.0121
784	Single-stranded nucleic acid-binding protein OS=Saccharomyces cerevisiae (strain ATCC 204508 / S288c) OX=559292 GN=SBP1 PE=1 SV=2	P10080	33	2.3646	0	4.3857	2.6454	17.626	15.311	14.536	11.902	0	0.86554	0.89679	1.5304	0	1.2024
785	Bud site selection protein 7 OS=Saccharomyces cerevisiae (strain ATCC 204508 / S288c) OX=559292 GN=BUD7 PE=1 SV=1	Q08754	85	10.641	8.3652	7.675	7.0544	2.5179	1.7012	4.8455	4.9007	1.0749	0.86554	1.7936	13.774	12.645	7.2146
786	tRNA-aminoacylation cofactor ARC1 OS=Saccharomyces cerevisiae (strain ATCC 204508 / S288c) OX=559292 GN=ARC1 PE=1 SV=2	P46672	42	4.7292	5.0191	12.061	5.2908	10.911	3.4024	8.8834	6.3009	0	3.4622	2.6904	4.5912	7.5872	8.417
787	Epsin-5 OS=Saccharomyces cerevisiae (strain ATCC 204508 / S288c) OX=559292 GN=ENT5 PE=1 SV=1	Q03769	47	13.005	11.711	14.254	10.582	1.6786	1.7012	4.8455	2.8004	0	0	0	12.243	13.91	9.6194
788	SIT4-associating protein SAP190 OS=Saccharomyces cerevisiae (strain ATCC 204508 / S288c) OX=559292 GN=SAP190 PE=1 SV=2	P36123	117	1.1823	0	1.0964	0.8818	6.7145	10.207	10.499	11.202	18.274	9.5209	7.1743	0	0	1.2024
789	DNA-directed RNA polymerase II subunit RPB4 OS=Saccharomyces cerevisiae (strain ATCC 204508 / S288c) OX=559292 GN=RPB4 PE=1 SV=1	P20433	25	1.1823	0	0	0	8.3931	13.609	10.499	9.8014	11.824	9.5209	8.0711	0	0	1.2024
790	Histone-lysine N-methyltransferase, H3 lysine-36 specific OS=Saccharomyces cerevisiae (strain ATCC 204508 / S288c) OX=559292 GN=SET2 PE=1 SV=2	P46995	84	14.188	6.6921	1.0964	10.582	0	0	0	0	0	0	0	16.834	25.291	25.251
791	Serine/threonine-protein phosphatase PP-Z1 OS=Saccharomyces cerevisiae (strain ATCC 204508 / S288c) OX=559292 GN=PPZ1 PE=1 SV=5	P26570	77	8.2761	6.6921	3.2893	7.9362	2.5179	4.253	4.0379	2.8004	2.1498	8.6554	7.1743	1.5304	17.703	10.822
792	Pre-tRNA-processing protein PTA1 OS=Saccharomyces cerevisiae (strain ATCC 204508 / S288c) OX=559292 GN=PTA1 PE=1 SV=1	Q01329	88	3.5469	6.6921	1.0964	13.227	1.6786	7.6553	7.2682	4.9007	3.2247	3.4622	2.6904	7.652	8.8517	4.8097
793	Serine/threonine-protein phosphatase PP2A-2 catalytic subunit OS=Saccharomyces cerevisiae (strain ATCC 204508 / S288c) OX=559292 GN=PPH22 PE=1 SV=1	P23595	43	4.7292	0	5.4822	7.0544	4.1966	5.9541	11.306	9.8014	8.5993	3.4622	6.2775	6.1216	1.2645	4.8097
794	Protein EFR3 OS=Saccharomyces cerevisiae (strain ATCC 204508 / S288c) OX=559292 GN=EFR3 PE=1 SV=1	Q03653	89	9.4584	5.0191	6.5786	14.109	0	0.85059	1.6152	0.7001	1.0749	2.5966	0.89679	4.5912	7.5872	14.429
795	Coatomer subunit epsilon OS=Saccharomyces cerevisiae (strain ATCC 204508 / S288c) OX=559292 GN=SEC28 PE=1 SV=2	P40509	34	1.1823	0	2.1929	2.6454	8.3931	10.207	8.8834	8.4012	15.049	5.1932	6.2775	0	1.2645	4.8097
796	40S ribosomal protein S26-A OS=Saccharomyces cerevisiae (strain ATCC 204508 / S288c) OX=559292 GN=RPS26A PE=1 SV=1	P39938	14	8.2761	6.6921	2.1929	0.8818	0	0	0.80758	0	17.199	16.445	19.729	1.5304	2.5291	1.2024
797	Protein JSN1 OS=Saccharomyces cerevisiae (strain ATCC 204508 / S288c) OX=559292 GN=JSN1 PE=1 SV=1	P47135	120	24.828	3.3461	0	21.163	3.3572	1.7012	0	1.4002	0	0	0.89679	6.1216	12.645	18.036
798	Elongation factor 1 alpha-like protein OS=Saccharomyces cerevisiae (strain ATCC 204508 / S288c) OX=559292 GN=HBS1 PE=1 SV=2	P32769	69	0	0	1.0964	0.8818	10.072	8.5059	12.921	9.1013	12.899	6.9243	7.1743	0	0	1.2024
799	Glycogen [starch] synthase isoform 1 OS=Saccharomyces cerevisiae (strain ATCC 204508 / S288c) OX=559292 GN=GSY1 PE=1 SV=3	P23337	81	0	0	2.1929	1.7636	5.0359	4.253	10.499	11.202	15.049	6.9243	11.658	0	0	0
800	Repressible alkaline phosphatase OS=Saccharomyces cerevisiae (strain ATCC 204508 / S288c) OX=559292 GN=PHO8 PE=1 SV=2	P11491	63	0	0	0	0	14.268	7.6553	10.499	9.1013	7.5244	10.386	12.555	0	0	0
801	Branched-chain-amino-acid aminotransferase, cytosolic OS=Saccharomyces cerevisiae (strain ATCC 204508 / S288c) OX=559292 GN=BAT2 PE=1 SV=1	P47176	42	13.005	15.057	13.157	10.582	0	0.85059	0.80758	3.5005	1.0749	0.86554	3.5871	12.243	13.91	9.6194
802	Bifunctional purine biosynthesis protein ADE16 OS=Saccharomyces cerevisiae (strain ATCC 204508 / S288c) OX=559292 GN=ADE16 PE=1 SV=1	P54113	65	10.641	10.038	17.543	11.463	0	0	0.80758	2.8004	0	1.7311	3.5871	7.652	12.645	10.822
803	Dihydrolipoyllysine-residue succinyltransferase component of 2-oxoglutarate dehydrogenase complex, mitochondrial OS=Saccharomyces cerevisiae (strain ATCC 204508 / S288c) OX=559292 GN=KGD2 PE=1 SV=2	P19262	50	3.5469	0	0	5.2908	10.911	11.058	10.499	8.4012	3.2247	5.1932	6.2775	1.5304	0	2.4049
804	Vacuolar aminopeptidase 1 OS=Saccharomyces cerevisiae (strain ATCC 204508 / S288c) OX=559292 GN=APE1 PE=1 SV=2	P14904	57	2.3646	0	1.0964	6.1726	10.911	9.3565	16.152	13.302	0	0.86554	0	1.5304	0	3.6073
805	Probable alanine aminotransferase, mitochondrial OS=Saccharomyces cerevisiae (strain ATCC 204508 / S288c) OX=559292 GN=ALT1 PE=1 SV=1	P52893	66	1.1823	0	0	4.409	12.59	12.759	18.574	13.302	0	0.86554	0	3.0608	1.2645	1.2024
806	5'-3' exoribonuclease 2 OS=Saccharomyces cerevisiae (strain ATCC 204508 / S288c) OX=559292 GN=RAT1 PE=1 SV=3	Q02792	116	11.823	5.0191	2.1929	2.6454	14.268	11.908	12.114	9.1013	0	0.86554	0	0	0	0
807	ATP-dependent RNA helicase MSS116, mitochondrial OS=Saccharomyces cerevisiae (strain ATCC 204508 / S288c) OX=559292 GN=MSS116 PE=1 SV=1	P15424	76	0	1.673	9.8679	0.8818	0	0	4.0379	0	13.974	22.504	16.142	0	0	1.2024
808	60S ribosomal protein L35-B OS=Saccharomyces cerevisiae (strain ATCC 204508 / S288c) OX=559292 GN=RPL35B PE=1 SV=1	P0CX85	14	8.2761	3.3461	0	0	0	0	0	0	23.648	19.907	20.626	0	1.2645	3.6073
809	AP-1 accessory protein LAA1 OS=Saccharomyces cerevisiae (strain ATCC 204508 / S288c) OX=559292 GN=LAA1 PE=1 SV=1	P39526	230	11.823	13.384	18.639	7.9362	1.6786	1.7012	0.80758	2.1003	1.0749	1.7311	1.7936	6.1216	10.116	8.417
810	Isopentenyl-diphosphate Delta-isomerase OS=Saccharomyces cerevisiae (strain ATCC 204508 / S288c) OX=559292 GN=IDI1 PE=1 SV=2	P15496	33	2.3646	1.673	4.3857	2.6454	9.2324	11.058	11.306	10.501	1.0749	1.7311	1.7936	1.5304	2.5291	3.6073
811	Histone H2B.1 OS=Saccharomyces cerevisiae (strain ATCC 204508 / S288c) OX=559292 GN=HTB1 PE=1 SV=2	P02293	14	3.5469	10.038	9.8679	2.6454	0.83931	0.85059	0	0	15.049	5.1932	8.0711	12.243	8.8517	6.0121
812	AP-2 complex subunit alpha OS=Saccharomyces cerevisiae (strain ATCC 204508 / S288c) OX=559292 GN=APL3 PE=1 SV=1	P38065	115	18.917	10.038	6.5786	20.281	1.6786	0.85059	1.6152	3.5005	1.0749	0	0	6.1216	8.8517	7.2146
813	Nicotinamide/nicotinic acid mononucleotide adenylyltransferase 1 OS=Saccharomyces cerevisiae (strain ATCC 204508 / S288c) OX=559292 GN=NMA1 PE=1 SV=1	Q06178	46	1.1823	0	0	0.8818	7.5538	11.058	8.8834	4.2006	15.049	13.849	8.9679	0	0	1.2024
814	Probable tubulin--tyrosine ligase PBY1 OS=Saccharomyces cerevisiae (strain ATCC 204508 / S288c) OX=559292 GN=PBY1 PE=1 SV=2	P38254	86	0	0	1.0964	0	13.429	11.058	12.921	10.501	9.6742	6.0588	5.3807	0	0	1.2024
815	ER-retained PMA1-suppressing protein 1 OS=Saccharomyces cerevisiae (strain ATCC 204508 / S288c) OX=559292 GN=EPS1 PE=1 SV=1	P40557	81	0	0	0	0	17.626	14.46	3.2303	15.402	2.1498	6.9243	6.2775	0	0	0
816	Aminomethyltransferase, mitochondrial OS=Saccharomyces cerevisiae (strain ATCC 204508 / S288c) OX=559292 GN=GCV1 PE=1 SV=2	P48015	44	16.552	11.711	17.543	7.0544	0	0	0	0	0	0	0	9.1825	18.968	12.024
817	Protein CASP OS=Saccharomyces cerevisiae (strain ATCC 204508 / S288c) OX=559292 GN=COY1 PE=1 SV=2	P34237	78	0	0	0	0	15.108	11.908	7.2682	16.802	0	9.5209	7.1743	0	0	0
818	Uncharacterized protein YGR130C OS=Saccharomyces cerevisiae (strain ATCC 204508 / S288c) OX=559292 GN=YGR130C PE=1 SV=1	P53278	93	1.1823	1.673	0	7.9362	4.1966	4.253	2.4227	9.8014	3.2247	13.849	13.452	0	1.2645	2.4049
819	Homoserine kinase OS=Saccharomyces cerevisiae (strain ATCC 204508 / S288c) OX=559292 GN=THR1 PE=1 SV=4	P17423	39	14.188	11.711	12.061	7.0544	3.3572	0	2.4227	4.2006	0	0.86554	2.6904	10.713	12.645	7.2146
820	Acetyl-CoA acetyltransferase OS=Saccharomyces cerevisiae (strain ATCC 204508 / S288c) OX=559292 GN=ERG10 PE=1 SV=3	P41338	42	7.0938	11.711	16.446	11.463	0	0	0	2.8004	0	2.5966	3.5871	15.304	12.645	9.6194
821	General negative regulator of transcription subunit 2 OS=Saccharomyces cerevisiae (strain ATCC 204508 / S288c) OX=559292 GN=CDC36 PE=1 SV=1	P06100	22	8.2761	10.038	7.675	6.1726	0.83931	3.4024	3.2303	3.5005	2.1498	2.5966	2.6904	9.1825	6.3226	8.417
822	Ribose-phosphate pyrophosphokinase 2 OS=Saccharomyces cerevisiae (strain ATCC 204508 / S288c) OX=559292 GN=PRS2 PE=1 SV=1	P38620	35	5.9115	0	2.1929	2.6454	5.0359	2.5518	11.306	5.6008	16.124	4.3277	5.3807	4.5912	5.0581	7.2146
823	Serine/threonine-protein kinase SCH9 OS=Saccharomyces cerevisiae (strain ATCC 204508 / S288c) OX=559292 GN=SCH9 PE=1 SV=3	P11792	92	7.0938	6.6921	10.964	7.9362	7.5538	7.6553	5.6531	4.2006	4.2997	5.1932	2.6904	4.5912	0	1.2024
824	Uncharacterized membrane protein YFL034W OS=Saccharomyces cerevisiae (strain ATCC 204508 / S288c) OX=559292 GN=YFL034W PE=1 SV=2	P43564	120	3.5469	0	31.797	8.818	4.1966	5.1035	2.4227	4.9007	3.2247	0.86554	3.5871	3.0608	2.5291	1.2024
825	GTP-binding protein YPT52 OS=Saccharomyces cerevisiae (strain ATCC 204508 / S288c) OX=559292 GN=YPT52 PE=1 SV=1	P36018	26	4.7292	0	4.3857	3.5272	10.072	11.908	6.4607	10.501	6.4495	5.1932	6.2775	0	1.2645	1.2024
826	Exocyst complex component SEC8 OS=Saccharomyces cerevisiae (strain ATCC 204508 / S288c) OX=559292 GN=SEC8 PE=1 SV=1	P32855	122	9.4584	0	0	10.582	3.3572	6.8047	6.4607	4.2006	10.749	10.386	8.0711	3.0608	0	0
827	E3 ubiquitin-protein ligase TOM1 OS=Saccharomyces cerevisiae (strain ATCC 204508 / S288c) OX=559292 GN=TOM1 PE=1 SV=1	Q03280	374	0	1.673	0	1.7636	0	2.5518	6.4607	2.8004	17.199	17.311	19.729	1.5304	0	0
828	Hsp90 co-chaperone Cdc37 OS=Saccharomyces cerevisiae (strain ATCC 204508 / S288c) OX=559292 GN=CDC37 PE=1 SV=2	P06101	58	0	0	3.2893	0	15.947	15.311	12.921	13.302	0	0	0	0	1.2645	1.2024
829	Lipoyl synthase, mitochondrial OS=Saccharomyces cerevisiae (strain ATCC 204508 / S288c) OX=559292 GN=LIP5 PE=1 SV=1	P32875	46	10.641	10.038	14.254	11.463	0	0	0	0	0	0	0	15.304	20.232	15.632
830	Spindle assembly checkpoint component MAD1 OS=Saccharomyces cerevisiae (strain ATCC 204508 / S288c) OX=559292 GN=MAD1 PE=1 SV=1	P40957	88	0	0	0	0	14.268	11.058	17.767	16.802	0	3.4622	0.89679	0	0	0
831	Regulator of V-ATPase in vacuolar membrane protein 1 OS=Saccharomyces cerevisiae (strain ATCC 204508 / S288c) OX=559292 GN=RAV1 PE=1 SV=1	P47104	155	0	0	0	0	13.429	13.609	16.959	18.203	1.0749	0.86554	0	0	0	0
832	Pre-mRNA-processing factor 19 OS=Saccharomyces cerevisiae (strain ATCC 204508 / S288c) OX=559292 GN=PRP19 PE=1 SV=2	P32523	57	1.1823	8.3652	12.061	4.409	1.6786	3.4024	7.2682	7.001	1.0749	0.86554	1.7936	6.1216	20.232	8.417
833	Thioredoxin reductase 1 OS=Saccharomyces cerevisiae (strain ATCC 204508 / S288c) OX=559292 GN=TRR1 PE=1 SV=3	P29509	34	4.7292	6.6921	12.061	7.9362	5.8752	1.7012	6.4607	7.7011	0	0.86554	2.6904	7.652	8.8517	6.0121
834	V-type proton ATPase subunit d OS=Saccharomyces cerevisiae (strain ATCC 204508 / S288c) OX=559292 GN=VMA6 PE=1 SV=2	P32366	40	3.5469	1.673	0	3.5272	8.3931	8.5059	6.4607	9.1013	5.3746	5.1932	8.0711	13.774	1.2645	2.4049
835	Kinesin-like protein KIP3 OS=Saccharomyces cerevisiae (strain ATCC 204508 / S288c) OX=559292 GN=KIP3 PE=1 SV=1	P53086	91	7.0938	11.711	23.025	3.5272	0.83931	0.85059	0	0.7001	0	1.7311	1.7936	0	26.555	4.8097
836	Phosphoribosylaminoimidazole carboxylase OS=Saccharomyces cerevisiae (strain ATCC 204508 / S288c) OX=559292 GN=ADE2 PE=1 SV=1	P21264	62	8.2761	1.673	19.736	13.227	1.6786	0	1.6152	4.9007	0	2.5966	3.5871	4.5912	6.3226	3.6073
837	Partitioning protein REP2 OS=Saccharomyces cerevisiae (strain ATCC 204508 / S288c) OX=559292 GN=REP2 PE=1 SV=1	P03872	33	10.641	11.711	5.4822	11.463	0	0	0	0.7001	5.3746	5.1932	5.3807	10.713	13.91	12.024
838	Probable transcription factor TDA9 OS=Saccharomyces cerevisiae (strain ATCC 204508 / S288c) OX=559292 GN=TDA9 PE=1 SV=1	Q04545	141	16.552	10.038	4.3857	12.345	0	0	0	0.7001	0	0	0.89679	13.774	17.703	12.024
839	Phosphoribosylaminoimidazole-succinocarboxamide synthase OS=Saccharomyces cerevisiae (strain ATCC 204508 / S288c) OX=559292 GN=ADE1 PE=1 SV=2	P27616	35	11.823	15.057	13.157	12.345	0	0	0	0	0	0.86554	1.7936	6.1216	16.439	12.024
840	Eukaryotic initiation factor 4F subunit p150 OS=Saccharomyces cerevisiae (strain ATCC 204508 / S288c) OX=559292 GN=TIF4631 PE=1 SV=2	P39935	107	4.7292	6.6921	2.1929	6.1726	8.3931	11.908	4.0379	7.001	1.0749	1.7311	1.7936	4.5912	3.7936	4.8097
841	60S ribosomal protein L2-B OS=Saccharomyces cerevisiae (strain ATCC 204508 / S288c) OX=559292 GN=RPL2B PE=1 SV=1	P0CX46	27	1.1823	1.673	6.5786	5.2908	1.6786	2.5518	3.2303	2.8004	5.3746	14.714	12.555	6.1216	5.0581	6.0121
842	Cofilin OS=Saccharomyces cerevisiae (strain ATCC 204508 / S288c) OX=559292 GN=COF1 PE=1 SV=1	Q03048	16	7.0938	10.038	7.675	6.1726	6.7145	5.9541	3.2303	9.8014	0	0	0	6.1216	5.0581	16.834
843	General negative regulator of transcription subunit 3 OS=Saccharomyces cerevisiae (strain ATCC 204508 / S288c) OX=559292 GN=NOT3 PE=1 SV=2	P06102	94	2.3646	0	1.0964	5.2908	4.1966	6.8047	5.6531	9.1013	12.899	9.5209	7.1743	0	0	3.6073
844	Dimethyladenosine transferase OS=Saccharomyces cerevisiae (strain ATCC 204508 / S288c) OX=559292 GN=DIM1 PE=3 SV=1	P41819	36	9.4584	10.038	9.8679	6.1726	0	0	2.4227	0	1.0749	0.86554	0.89679	12.243	20.232	14.429
845	Tropomyosin-2 OS=Saccharomyces cerevisiae (strain ATCC 204508 / S288c) OX=559292 GN=TPM2 PE=1 SV=1	P40414	19	0	1.673	1.0964	2.6454	10.911	8.5059	12.921	9.1013	1.0749	10.386	6.2775	0	1.2645	0
846	Pre-mRNA-splicing factor SNU114 OS=Saccharomyces cerevisiae (strain ATCC 204508 / S288c) OX=559292 GN=SNU114 PE=1 SV=1	P36048	114	0	0	7.675	0.8818	5.0359	4.253	11.306	6.3009	10.749	8.6554	12.555	0	0	0
847	DNA-directed RNA polymerase III subunit RPC7 OS=Saccharomyces cerevisiae (strain ATCC 204508 / S288c) OX=559292 GN=RPC31 PE=1 SV=1	P17890	28	0	0	0	1.7636	5.0359	5.1035	8.0758	7.7011	10.749	9.5209	14.349	0	0	0
848	3-oxoacyl-[acyl-carrier-protein] synthase homolog OS=Saccharomyces cerevisiae (strain ATCC 204508 / S288c) OX=559292 GN=CEM1 PE=1 SV=1	P39525	48	13.005	11.711	14.254	13.227	0	0	0	0	0	0	0	6.1216	21.497	14.429
849	Ribosome biogenesis protein SSF2 OS=Saccharomyces cerevisiae (strain ATCC 204508 / S288c) OX=559292 GN=SSF2 PE=1 SV=1	Q12153	52	0	0	0	0	0	0	0	0	20.423	18.176	18.833	0	0	0
850	Protein STE5 OS=Saccharomyces cerevisiae (strain ATCC 204508 / S288c) OX=559292 GN=STE5 PE=1 SV=2	P32917	103	22.464	3.3461	1.0964	21.163	1.6786	3.4024	0.80758	0.7001	0	1.7311	1.7936	6.1216	5.0581	10.822
851	Ankyrin repeat-containing protein YCR051W OS=Saccharomyces cerevisiae (strain ATCC 204508 / S288c) OX=559292 GN=YCR051W PE=1 SV=1	P25631	25	1.1823	1.673	2.1929	3.5272	7.5538	9.3565	16.152	12.602	4.2997	2.5966	3.5871	1.5304	0	2.4049
852	2-oxoglutarate dehydrogenase, mitochondrial OS=Saccharomyces cerevisiae (strain ATCC 204508 / S288c) OX=559292 GN=KGD1 PE=1 SV=2	P20967	114	2.3646	0	7.675	6.1726	7.5538	5.1035	15.344	8.4012	2.1498	3.4622	3.5871	0	2.5291	3.6073
853	Adenosine kinase OS=Saccharomyces cerevisiae (strain ATCC 204508 / S288c) OX=559292 GN=ADO1 PE=1 SV=1	P47143	36	10.641	13.384	14.254	11.463	0.83931	0.85059	0	2.1003	0	1.7311	0.89679	12.243	13.91	10.822
854	Phosphatidylinositol transfer protein CSR1 OS=Saccharomyces cerevisiae (strain ATCC 204508 / S288c) OX=559292 GN=CSR1 PE=1 SV=1	Q06705	47	7.0938	5.0191	0	7.0544	8.3931	1.7012	0	1.4002	0	4.3277	1.7936	19.895	7.5872	8.417
855	Probable serine/threonine-protein kinase HSL1 OS=Saccharomyces cerevisiae (strain ATCC 204508 / S288c) OX=559292 GN=HSL1 PE=1 SV=2	P34244	170	1.1823	0	5.4822	24.69	0.83931	3.4024	0	2.8004	2.1498	3.4622	3.5871	0	8.8517	13.227
856	Methylenetetrahydrofolate reductase 1 OS=Saccharomyces cerevisiae (strain ATCC 204508 / S288c) OX=559292 GN=MET12 PE=1 SV=2	P46151	74	0	0	2.1929	0.8818	7.5538	10.207	10.499	8.4012	7.5244	6.9243	10.761	0	1.2645	2.4049
857	Origin recognition complex subunit 1 OS=Saccharomyces cerevisiae (strain ATCC 204508 / S288c) OX=559292 GN=ORC1 PE=1 SV=1	P54784	104	10.641	0	16.446	22.927	0	0	1.6152	0.7001	6.4495	4.3277	1.7936	0	0	6.0121
858	DNA repair protein RAD5 OS=Saccharomyces cerevisiae (strain ATCC 204508 / S288c) OX=559292 GN=RAD5 PE=1 SV=1	P32849	134	7.0938	0	23.025	19.399	3.3572	2.5518	2.4227	6.3009	1.0749	0.86554	0	3.0608	0	3.6073
859	Cleavage factor two protein 2 OS=Saccharomyces cerevisiae (strain ATCC 204508 / S288c) OX=559292 GN=CFT2 PE=1 SV=1	Q12102	96	0	0	0	0	5.8752	8.5059	11.306	14.702	8.5993	6.9243	7.1743	0	1.2645	1.2024
860	DNA polymerase epsilon catalytic subunit A OS=Saccharomyces cerevisiae (strain ATCC 204508 / S288c) OX=559292 GN=POL2 PE=1 SV=1	P21951	256	0	0	1.0964	3.5272	0	2.5518	5.6531	0.7001	23.648	14.714	17.936	0	0	0
861	Enhancer of translation termination 1 OS=Saccharomyces cerevisiae (strain ATCC 204508 / S288c) OX=559292 GN=ETT1 PE=1 SV=1	Q08421	47	0	0	3.2893	1.7636	8.3931	11.908	12.921	9.8014	5.3746	0	0	6.1216	0	1.2024
862	SIT4-associating protein SAP155 OS=Saccharomyces cerevisiae (strain ATCC 204508 / S288c) OX=559292 GN=SAP155 PE=1 SV=4	P43612	115	0	0	1.0964	0.8818	11.75	10.207	12.114	10.501	6.4495	6.0588	3.5871	3.0608	0	0
863	Nonsense-mediated mRNA decay protein 2 OS=Saccharomyces cerevisiae (strain ATCC 204508 / S288c) OX=559292 GN=NMD2 PE=1 SV=2	P38798	127	7.0938	3.3461	2.1929	18.518	0	0	0	0	8.5993	7.7899	8.9679	1.5304	7.5872	10.822
864	Cytokinesis protein 3 OS=Saccharomyces cerevisiae (strain ATCC 204508 / S288c) OX=559292 GN=CYK3 PE=1 SV=1	Q07533	101	10.641	5.0191	3.2893	22.927	0	0	0	0	0	0	0	10.713	12.645	15.632
865	DNA polymerase alpha-associated DNA helicase A OS=Saccharomyces cerevisiae (strain ATCC 204508 / S288c) OX=559292 GN=HCS1 PE=1 SV=1	P34243	78	13.005	13.384	14.254	7.9362	0	0	0	0	0	0	0	6.1216	20.232	13.227
866	Splicing factor YJU2 OS=Saccharomyces cerevisiae (strain ATCC 204508 / S288c) OX=559292 GN=YJU2 PE=1 SV=1	P28320	32	13.005	16.73	6.5786	11.463	0	0	0	0	0	0	0	7.652	17.703	13.227
867	Aldehyde dehydrogenase 5, mitochondrial OS=Saccharomyces cerevisiae (strain ATCC 204508 / S288c) OX=559292 GN=ALD5 PE=1 SV=4	P40047	57	11.823	8.3652	10.964	14.109	2.5179	0.85059	1.6152	5.6008	0	3.4622	0.89679	1.5304	5.0581	8.417
868	Protein-lysine N-methyltransferase EFM5 OS=Saccharomyces cerevisiae (strain ATCC 204508 / S288c) OX=559292 GN=EFM5 PE=1 SV=2	P53200	29	1.1823	0	1.0964	1.7636	8.3931	7.6553	8.0758	7.7011	9.6742	7.7899	8.9679	3.0608	1.2645	1.2024
869	Saccharopine dehydrogenase [NADP(+), L-glutamate-forming] OS=Saccharomyces cerevisiae (strain ATCC 204508 / S288c) OX=559292 GN=LYS9 PE=1 SV=1	P38999	49	2.3646	5.0191	13.157	9.6997	6.7145	2.5518	6.4607	11.202	0	0	0	1.5304	6.3226	4.8097
870	Glucose-6-phosphate 1-dehydrogenase OS=Saccharomyces cerevisiae (strain ATCC 204508 / S288c) OX=559292 GN=ZWF1 PE=1 SV=4	P11412	58	4.7292	5.0191	10.964	6.1726	7.5538	1.7012	4.0379	15.402	0	0	0	1.5304	5.0581	4.8097
871	Methionine aminopeptidase 2 OS=Saccharomyces cerevisiae (strain ATCC 204508 / S288c) OX=559292 GN=MAP2 PE=1 SV=4	P38174	48	0	0	5.4822	1.7636	0.83931	0.85059	4.0379	6.3009	25.798	9.5209	8.0711	0	2.5291	2.4049
872	Pre-mRNA-splicing factor ATP-dependent RNA helicase-like protein PRP2 OS=Saccharomyces cerevisiae (strain ATCC 204508 / S288c) OX=559292 GN=PRP2 PE=1 SV=1	P20095	100	15.37	8.3652	13.157	9.6997	1.6786	1.7012	0	2.1003	0	0	0	9.1825	12.645	9.6194
873	Heat shock protein 42 OS=Saccharomyces cerevisiae (strain ATCC 204508 / S288c) OX=559292 GN=HSP42 PE=1 SV=1	Q12329	43	0	0	1.0964	0.8818	8.3931	5.9541	7.2682	5.6008	7.5244	11.252	8.0711	0	0	0
874	Nucleoside diphosphate kinase OS=Saccharomyces cerevisiae (strain ATCC 204508 / S288c) OX=559292 GN=YNK1 PE=1 SV=1	P36010	17	9.4584	15.057	14.254	9.6997	0.83931	0	0.80758	0	0	1.7311	0	7.652	11.381	7.2146
875	Serine/threonine-protein phosphatase PP2A-1 catalytic subunit OS=Saccharomyces cerevisiae (strain ATCC 204508 / S288c) OX=559292 GN=PPH21 PE=1 SV=1	P23594	42	0	0	0	5.2908	5.0359	6.8047	9.691	7.001	10.749	3.4622	7.1743	0	0	4.8097
876	Protein EBS1 OS=Saccharomyces cerevisiae (strain ATCC 204508 / S288c) OX=559292 GN=EBS1 PE=3 SV=1	Q03466	100	4.7292	6.6921	10.964	14.991	0	0	0	0	0	0.86554	0	6.1216	15.174	18.036
877	Inorganic phosphate transporter PHO84 OS=Saccharomyces cerevisiae (strain ATCC 204508 / S288c) OX=559292 GN=PHO84 PE=1 SV=2	P25297	64	0	0	0	0	10.911	7.6553	8.0758	9.8014	5.3746	8.6554	12.555	0	0	0
878	Protein phosphatase 2C homolog 2 OS=Saccharomyces cerevisiae (strain ATCC 204508 / S288c) OX=559292 GN=PTC2 PE=1 SV=1	P39966	50	0	0	3.2893	0	13.429	15.311	8.0758	11.202	5.3746	3.4622	0	0	0	0
879	Ribosomal RNA-processing protein 14 OS=Saccharomyces cerevisiae (strain ATCC 204508 / S288c) OX=559292 GN=RRP14 PE=1 SV=1	P36080	50	1.1823	1.673	0	0	0	0	0.80758	0	23.648	25.101	18.833	0	0	0
880	Dilute domain-containing protein YPR089W OS=Saccharomyces cerevisiae (strain ATCC 204508 / S288c) OX=559292 GN=YPR089W PE=1 SV=2	O13585	103	8.2761	3.3461	3.2893	3.5272	5.0359	3.4024	4.0379	3.5005	2.1498	1.7311	2.6904	21.426	5.0581	7.2146
881	Ribosome-interacting GTPase 1 OS=Saccharomyces cerevisiae (strain ATCC 204508 / S288c) OX=559292 GN=RBG1 PE=1 SV=1	P39729	41	15.37	10.038	16.446	12.345	0.83931	0.85059	1.6152	1.4002	0	0.86554	0.89679	7.652	7.5872	7.2146
882	Chromatin modification-related protein EAF3 OS=Saccharomyces cerevisiae (strain ATCC 204508 / S288c) OX=559292 GN=EAF3 PE=1 SV=1	Q12432	45	11.823	10.038	8.7714	10.582	1.6786	0.85059	0.80758	2.1003	0	1.7311	0	6.1216	15.174	14.429
883	Serine/threonine-protein phosphatase PP1-1 OS=Saccharomyces cerevisiae (strain ATCC 204508 / S288c) OX=559292 GN=SIT4 PE=1 SV=1	P20604	36	1.1823	0	1.0964	1.7636	8.3931	9.3565	10.499	9.1013	11.824	5.1932	5.3807	0	0	0
884	E3 ubiquitin-protein ligase PEP5 OS=Saccharomyces cerevisiae (strain ATCC 204508 / S288c) OX=559292 GN=PEP5 PE=1 SV=2	P12868	117	3.5469	0	5.4822	8.818	0.83931	2.5518	2.4227	5.6008	5.3746	4.3277	2.6904	3.0608	8.8517	8.417
885	AP-3 complex subunit mu OS=Saccharomyces cerevisiae (strain ATCC 204508 / S288c) OX=559292 GN=APM3 PE=1 SV=2	P38153	55	5.9115	3.3461	1.0964	9.6997	7.5538	9.3565	2.4227	9.8014	6.4495	5.1932	4.4839	1.5304	0	1.2024
886	DNA-dependent ATPase MGS1 OS=Saccharomyces cerevisiae (strain ATCC 204508 / S288c) OX=559292 GN=MGS1 PE=1 SV=2	P40151	67	16.552	10.038	3.2893	22.927	0	0	0	0	0	0	0	1.5304	5.0581	15.632
887	Eukaryotic translation initiation factor 5A-2 OS=Saccharomyces cerevisiae (strain ATCC 204508 / S288c) OX=559292 GN=ANB1 PE=1 SV=3	P19211	17	0	0	0	0	6.7145	7.6553	7.2682	5.6008	9.6742	4.3277	0	0	0	0
888	Nascent polypeptide-associated complex subunit alpha OS=Saccharomyces cerevisiae (strain ATCC 204508 / S288c) OX=559292 GN=EGD2 PE=1 SV=3	P38879	19	4.7292	6.6921	9.8679	5.2908	4.1966	5.9541	4.8455	4.2006	1.0749	3.4622	5.3807	6.1216	7.5872	7.2146
889	Glycerol-3-phosphate dehydrogenase [NAD(+)] 1 OS=Saccharomyces cerevisiae (strain ATCC 204508 / S288c) OX=559292 GN=GPD1 PE=1 SV=4	Q00055	43	1.1823	1.673	5.4822	2.6454	6.7145	5.9541	8.0758	8.4012	4.2997	3.4622	3.5871	3.0608	3.7936	6.0121
890	Diphthine methyl ester synthase OS=Saccharomyces cerevisiae (strain ATCC 204508 / S288c) OX=559292 GN=DPH5 PE=1 SV=1	P32469	34	2.3646	0	3.2893	0	10.911	8.5059	12.114	6.3009	5.3746	3.4622	1.7936	3.0608	2.5291	3.6073
891	Aspartate-semialdehyde dehydrogenase OS=Saccharomyces cerevisiae (strain ATCC 204508 / S288c) OX=559292 GN=HOM2 PE=1 SV=1	P13663	40	8.2761	10.038	10.964	10.582	1.6786	0	0.80758	2.1003	0	2.5966	4.4839	15.304	6.3226	8.417
892	SWI5-dependent HO expression protein 3 OS=Saccharomyces cerevisiae (strain ATCC 204508 / S288c) OX=559292 GN=SHE3 PE=1 SV=1	P38272	47	2.3646	3.3461	1.0964	2.6454	14.268	11.908	8.0758	7.001	0	5.1932	4.4839	0	3.7936	1.2024
893	Transcription initiation factor IIF subunit alpha OS=Saccharomyces cerevisiae (strain ATCC 204508 / S288c) OX=559292 GN=TFG1 PE=1 SV=2	P41895	82	1.1823	1.673	2.1929	1.7636	10.911	17.012	7.2682	9.1013	7.5244	0.86554	0.89679	0	0	0
894	Hydroxymethylglutaryl-CoA synthase OS=Saccharomyces cerevisiae (strain ATCC 204508 / S288c) OX=559292 GN=ERG13 PE=1 SV=1	P54839	55	13.005	8.3652	12.061	8.818	0	0	0	2.1003	0	1.7311	1.7936	12.243	11.381	12.024
895	Peptidyl-prolyl cis-trans isomerase ESS1 OS=Saccharomyces cerevisiae (strain ATCC 204508 / S288c) OX=559292 GN=ESS1 PE=1 SV=3	P22696	19	10.641	20.076	10.964	7.9362	0	0	0	0	0	0	0	13.774	15.174	12.024
896	Cytochrome c iso-1 OS=Saccharomyces cerevisiae (strain ATCC 204508 / S288c) OX=559292 GN=CYC1 PE=1 SV=2	P00044	12	7.0938	11.711	7.675	6.1726	0	0	0	0	0	0.86554	0.89679	10.713	16.439	12.024
897	Putative glycosyltransferase HOC1 OS=Saccharomyces cerevisiae (strain ATCC 204508 / S288c) OX=559292 GN=HOC1 PE=1 SV=3	P47124	46	1.1823	0	0	0	7.5538	10.207	4.0379	8.4012	9.6742	12.118	10.761	0	0	0
898	Superoxide dismutase [Cu-Zn] OS=Saccharomyces cerevisiae (strain ATCC 204508 / S288c) OX=559292 GN=SOD1 PE=1 SV=2	P00445	16	10.641	13.384	7.675	6.1726	2.5179	0.85059	0.80758	3.5005	1.0749	2.5966	3.5871	12.243	11.381	9.6194
899	60S ribosomal protein L22-A OS=Saccharomyces cerevisiae (strain ATCC 204508 / S288c) OX=559292 GN=RPL22A PE=1 SV=3	P05749	14	7.0938	5.0191	2.1929	1.7636	0.83931	0.85059	2.4227	1.4002	19.348	11.252	8.9679	1.5304	0	1.2024
900	Structural maintenance of chromosomes protein 4 OS=Saccharomyces cerevisiae (strain ATCC 204508 / S288c) OX=559292 GN=SMC4 PE=1 SV=1	Q12267	162	4.7292	3.3461	7.675	12.345	2.5179	5.9541	7.2682	5.6008	3.2247	1.7311	1.7936	1.5304	0	3.6073
901	Ribosomal RNA-processing protein 1 OS=Saccharomyces cerevisiae (strain ATCC 204508 / S288c) OX=559292 GN=RRP1 PE=1 SV=2	P35178	33	10.641	1.673	5.4822	7.9362	1.6786	1.7012	4.8455	2.8004	7.5244	4.3277	5.3807	3.0608	0	1.2024
902	Succinate--CoA ligase [ADP-forming] subunit alpha, mitochondrial OS=Saccharomyces cerevisiae (strain ATCC 204508 / S288c) OX=559292 GN=LSC1 PE=1 SV=1	P53598	35	11.823	8.3652	10.964	7.0544	0.83931	0.85059	2.4227	0.7001	0	1.7311	1.7936	9.1825	8.8517	7.2146
903	DNA replication licensing factor MCM2 OS=Saccharomyces cerevisiae (strain ATCC 204508 / S288c) OX=559292 GN=MCM2 PE=1 SV=2	P29469	99	1.1823	0	5.4822	1.7636	5.8752	4.253	12.921	9.8014	4.2997	5.1932	5.3807	6.1216	1.2645	1.2024
904	Monothiol glutaredoxin-3 OS=Saccharomyces cerevisiae (strain ATCC 204508 / S288c) OX=559292 GN=GRX3 PE=1 SV=2	Q03835	28	5.9115	0	2.1929	0.8818	1.6786	2.5518	4.0379	3.5005	13.974	8.6554	10.761	3.0608	2.5291	2.4049
905	Citrate synthase, mitochondrial OS=Saccharomyces cerevisiae (strain ATCC 204508 / S288c) OX=559292 GN=CIT1 PE=1 SV=2	P00890	53	11.823	6.6921	15.35	9.6997	0.83931	0.85059	0.80758	0.7001	0	0	0	10.713	7.5872	10.822
906	Vacuolar-sorting protein BRO1 OS=Saccharomyces cerevisiae (strain ATCC 204508 / S288c) OX=559292 GN=BRO1 PE=1 SV=2	P48582	97	5.9115	1.673	0	9.6997	4.1966	3.4024	3.2303	9.8014	0	0	0	19.895	0	1.2024
907	Ribosome biogenesis protein ERB1 OS=Saccharomyces cerevisiae (strain ATCC 204508 / S288c) OX=559292 GN=ERB1 PE=1 SV=1	Q04660	92	0	0	2.1929	0	0.83931	2.5518	6.4607	2.8004	17.199	15.58	17.039	0	0	0
908	Ribosome-recycling factor, mitochondrial OS=Saccharomyces cerevisiae (strain ATCC 204508 / S288c) OX=559292 GN=RRF1 PE=1 SV=1	P38771	26	5.9115	10.038	4.3857	7.0544	0	0	0	0	0	0	0	10.713	18.968	14.429
909	ATP-dependent RNA helicase DBP9 OS=Saccharomyces cerevisiae (strain ATCC 204508 / S288c) OX=559292 GN=DBP9 PE=1 SV=1	Q06218	68	3.5469	1.673	10.964	3.5272	0	0.85059	0.80758	0	5.3746	8.6554	6.2775	1.5304	12.645	12.024
910	Argininosuccinate lyase OS=Saccharomyces cerevisiae (strain ATCC 204508 / S288c) OX=559292 GN=ARG4 PE=1 SV=2	P04076	52	13.005	6.6921	8.7714	10.582	3.3572	0.85059	1.6152	3.5005	0	0	0.89679	6.1216	7.5872	10.822
911	Ornithine aminotransferase OS=Saccharomyces cerevisiae (strain ATCC 204508 / S288c) OX=559292 GN=CAR2 PE=1 SV=2	P07991	46	10.641	15.057	15.35	12.345	1.6786	0	2.4227	2.8004	0	0	1.7936	4.5912	11.381	2.4049
912	Glutathione reductase OS=Saccharomyces cerevisiae (strain ATCC 204508 / S288c) OX=559292 GN=GLR1 PE=1 SV=2	P41921	53	4.7292	3.3461	6.5786	5.2908	11.75	8.5059	6.4607	8.4012	0	0	0	3.0608	1.2645	1.2024
913	Telomere length regulation protein ELG1 OS=Saccharomyces cerevisiae (strain ATCC 204508 / S288c) OX=559292 GN=ELG1 PE=1 SV=1	Q12050	91	9.4584	1.673	1.0964	15.872	0	0.85059	0	0.7001	0	0.86554	0	15.304	7.5872	20.441
914	Protein THO1 OS=Saccharomyces cerevisiae (strain ATCC 204508 / S288c) OX=559292 GN=THO1 PE=1 SV=1	P40040	24	9.4584	16.73	8.7714	9.6997	0	0	0	0	0	0	0	12.243	13.91	14.429
915	Glycolipid 2-alpha-mannosyltransferase OS=Saccharomyces cerevisiae (strain ATCC 204508 / S288c) OX=559292 GN=KRE2 PE=1 SV=1	P27809	51	0	0	0	0	12.59	12.759	8.8834	12.602	0	4.3277	2.6904	0	0	3.6073
916	Protein CAJ1 OS=Saccharomyces cerevisiae (strain ATCC 204508 / S288c) OX=559292 GN=CAJ1 PE=1 SV=1	P39101	45	9.4584	8.3652	2.1929	6.1726	3.3572	3.4024	4.0379	5.6008	0	1.7311	0.89679	7.652	10.116	6.0121
917	SWI/SNF complex subunit SWI3 OS=Saccharomyces cerevisiae (strain ATCC 204508 / S288c) OX=559292 GN=SWI3 PE=1 SV=1	P32591	93	0	0	0	2.6454	6.7145	6.8047	10.499	5.6008	4.2997	4.3277	4.4839	3.0608	1.2645	1.2024
918	2-isopropylmalate synthase OS=Saccharomyces cerevisiae (strain ATCC 204508 / S288c) OX=559292 GN=LEU4 PE=1 SV=1	P06208	68	1.1823	3.3461	6.5786	5.2908	5.8752	2.5518	6.4607	12.602	0	0	0	1.5304	0	3.6073
919	SIT4-associating protein SAP185 OS=Saccharomyces cerevisiae (strain ATCC 204508 / S288c) OX=559292 GN=SAP185 PE=1 SV=1	P40856	121	0	0	0	3.5272	6.7145	9.3565	7.2682	7.001	8.5993	6.0588	5.3807	3.0608	0	0
920	Mannan polymerase II complex ANP1 subunit OS=Saccharomyces cerevisiae (strain ATCC 204508 / S288c) OX=559292 GN=ANP1 PE=1 SV=3	P32629	58	0	0	0	0	9.2324	6.8047	2.4227	7.7011	11.824	12.983	8.0711	0	0	0
921	High-affinity glutamine permease OS=Saccharomyces cerevisiae (strain ATCC 204508 / S288c) OX=559292 GN=GNP1 PE=1 SV=2	P48813	74	0	0	0	0	10.911	9.3565	4.8455	8.4012	0	11.252	11.658	0	0	0
922	Laminarase-resistance protein LRE1 OS=Saccharomyces cerevisiae (strain ATCC 204508 / S288c) OX=559292 GN=LRE1 PE=1 SV=2	P25579	65	13.005	13.384	0	6.1726	0	0	0	0	0	0	0	12.243	20.232	19.239
923	40S ribosomal protein S10-A OS=Saccharomyces cerevisiae (strain ATCC 204508 / S288c) OX=559292 GN=RPS10A PE=1 SV=1	Q08745	13	2.3646	3.3461	3.2893	3.5272	1.6786	1.7012	4.0379	2.8004	4.2997	9.5209	9.8647	4.5912	3.7936	3.6073
924	Serine/threonine-protein kinase RIO1 OS=Saccharomyces cerevisiae (strain ATCC 204508 / S288c) OX=559292 GN=RIO1 PE=1 SV=1	Q12196	56	3.5469	0	5.4822	7.9362	0.83931	5.9541	4.8455	3.5005	9.6742	4.3277	6.2775	0	2.5291	3.6073
925	Coatomer subunit zeta OS=Saccharomyces cerevisiae (strain ATCC 204508 / S288c) OX=559292 GN=RET3 PE=1 SV=1	P53600	22	2.3646	0	1.0964	4.409	7.5538	7.6553	6.4607	8.4012	6.4495	6.9243	5.3807	4.5912	1.2645	2.4049
926	Vacuole morphology and inheritance protein 14 OS=Saccharomyces cerevisiae (strain ATCC 204508 / S288c) OX=559292 GN=VAC14 PE=1 SV=1	Q06708	100	2.3646	0	0	5.2908	5.0359	6.8047	6.4607	10.501	3.2247	3.4622	1.7936	1.5304	0	6.0121
927	BNI1-related protein 1 OS=Saccharomyces cerevisiae (strain ATCC 204508 / S288c) OX=559292 GN=BNR1 PE=1 SV=1	P40450	157	7.0938	1.673	9.8679	16.754	0.83931	0.85059	0	0.7001	0	0.86554	0	3.0608	1.2645	21.644
928	Protein SCP160 OS=Saccharomyces cerevisiae (strain ATCC 204508 / S288c) OX=559292 GN=SCP160 PE=1 SV=3	P06105	135	0	0	1.0964	2.6454	2.5179	6.8047	13.729	9.1013	0	4.3277	2.6904	3.0608	3.7936	6.0121
929	Transcriptional regulatory protein RXT2 OS=Saccharomyces cerevisiae (strain ATCC 204508 / S288c) OX=559292 GN=RXT2 PE=1 SV=2	P38255	49	4.7292	0	4.3857	7.9362	3.3572	5.1035	4.8455	4.2006	7.5244	6.9243	10.761	0	0	1.2024
930	Serine/threonine-protein kinase ATG1 OS=Saccharomyces cerevisiae (strain ATCC 204508 / S288c) OX=559292 GN=ATG1 PE=1 SV=1	P53104	102	24.828	3.3461	1.0964	27.336	0.83931	0.85059	0	0.7001	0	0	0	0	0	6.0121
931	Transcription initiation factor TFIID subunit 12 OS=Saccharomyces cerevisiae (strain ATCC 204508 / S288c) OX=559292 GN=TAF12 PE=1 SV=1	Q03761	61	1.1823	0	0	5.2908	0	0	4.0379	3.5005	9.6742	15.58	13.452	3.0608	1.2645	0
932	General transcriptional corepressor TUP1 OS=Saccharomyces cerevisiae (strain ATCC 204508 / S288c) OX=559292 GN=TUP1 PE=1 SV=2	P16649	78	0	1.673	5.4822	0.8818	19.304	7.6553	4.0379	16.802	0	0	0.89679	0	0	0
933	Ubiquitin-binding protein CUE2 OS=Saccharomyces cerevisiae (strain ATCC 204508 / S288c) OX=559292 GN=CUE2 PE=1 SV=1	P36075	51	16.552	5.0191	6.5786	19.399	0	0	0	0	0	0	0	4.5912	6.3226	14.429
934	Telomere length regulation protein TEL2 OS=Saccharomyces cerevisiae (strain ATCC 204508 / S288c) OX=559292 GN=TEL2 PE=1 SV=1	P53038	79	10.641	1.673	12.061	15.872	0	0	0	0	0	0	0	7.652	2.5291	16.834
935	Ribosome biogenesis protein NOP53 OS=Saccharomyces cerevisiae (strain ATCC 204508 / S288c) OX=559292 GN=NOP53 PE=1 SV=1	Q12080	53	0	0	0	0	0	0	0	0	18.274	21.638	21.523	0	1.2645	0
936	Heat shock protein SSC3, mitochondrial OS=Saccharomyces cerevisiae (strain ATCC 204508 / S288c) OX=559292 GN=ECM10 PE=3 SV=1	P39987	70	4.7292	0	7.675	6.1726	0	0	0	0	0	0	0	6.1216	0	3.6073
937	DNA-directed RNA polymerases I, II, and III subunit RPABC2 OS=Saccharomyces cerevisiae (strain ATCC 204508 / S288c) OX=559292 GN=RPO26 PE=1 SV=1	P20435	18	1.1823	0	2.1929	0.8818	5.0359	5.9541	6.4607	5.6008	9.6742	9.5209	8.0711	1.5304	2.5291	1.2024
938	Glucokinase-1 OS=Saccharomyces cerevisiae (strain ATCC 204508 / S288c) OX=559292 GN=GLK1 PE=1 SV=1	P17709	55	1.1823	1.673	6.5786	1.7636	10.911	5.9541	12.921	9.8014	0	0	0.89679	0	1.2645	1.2024
939	Glutaredoxin-1 OS=Saccharomyces cerevisiae (strain ATCC 204508 / S288c) OX=559292 GN=GRX1 PE=1 SV=1	P25373	12	4.7292	1.673	5.4822	6.1726	6.7145	7.6553	10.499	10.501	0	0	0	1.5304	1.2645	3.6073
940	Casein kinase I homolog HRR25 OS=Saccharomyces cerevisiae (strain ATCC 204508 / S288c) OX=559292 GN=HRR25 PE=1 SV=1	P29295	57	8.2761	10.038	9.8679	7.0544	0	0.85059	0	0.7001	0	0	1.7936	7.652	20.232	10.822
941	Glycerol-1-phosphate phosphohydrolase 2 OS=Saccharomyces cerevisiae (strain ATCC 204508 / S288c) OX=559292 GN=GPP2 PE=1 SV=1	P40106	28	5.9115	10.038	6.5786	7.0544	0	0	0	0	0	0	0	6.1216	6.3226	4.8097
942	Guanine nucleotide exchange factor SRM1 OS=Saccharomyces cerevisiae (strain ATCC 204508 / S288c) OX=559292 GN=SRM1 PE=1 SV=1	P21827	53	4.7292	3.3461	3.2893	2.6454	3.3572	6.8047	8.8834	2.8004	6.4495	3.4622	0.89679	1.5304	2.5291	4.8097
943	GTP-binding protein YPT31/YPT8 OS=Saccharomyces cerevisiae (strain ATCC 204508 / S288c) OX=559292 GN=YPT31 PE=1 SV=3	P38555	24	5.9115	0	8.7714	1.7636	6.7145	5.1035	4.8455	8.4012	3.2247	3.4622	2.6904	1.5304	3.7936	3.6073
944	Replication factor A protein 1 OS=Saccharomyces cerevisiae (strain ATCC 204508 / S288c) OX=559292 GN=RFA1 PE=1 SV=1	P22336	70	0	0	3.2893	1.7636	13.429	9.3565	10.499	11.902	0	0	0	1.5304	1.2645	0
945	Phosphatidylinositol 4,5-bisphosphate-binding protein SLM1 OS=Saccharomyces cerevisiae (strain ATCC 204508 / S288c) OX=559292 GN=SLM1 PE=1 SV=1	P40485	78	9.4584	8.3652	2.1929	6.1726	0	0	0.80758	0	0	0	0	12.243	22.761	12.024
946	Protein DOA1 OS=Saccharomyces cerevisiae (strain ATCC 204508 / S288c) OX=559292 GN=DOA1 PE=1 SV=1	P36037	80	0	0	0	0	10.911	9.3565	15.344	18.203	0	0	0	0	0	0
947	ADP-ribosylation factor-like protein 1 OS=Saccharomyces cerevisiae (strain ATCC 204508 / S288c) OX=559292 GN=ARL1 PE=1 SV=4	P38116	20	5.9115	1.673	2.1929	2.6454	3.3572	3.4024	5.6531	5.6008	3.2247	3.4622	0.89679	13.774	5.0581	4.8097
948	Vacuolar protein sorting-associated protein 17 OS=Saccharomyces cerevisiae (strain ATCC 204508 / S288c) OX=559292 GN=VPS17 PE=1 SV=2	P32913	63	1.1823	5.0191	8.7714	3.5272	4.1966	3.4024	0	4.2006	2.1498	1.7311	2.6904	4.5912	7.5872	6.0121
949	L-2-aminoadipate reductase OS=Saccharomyces cerevisiae (strain ATCC 204508 / S288c) OX=559292 GN=LYS2 PE=1 SV=2	P07702	155	4.7292	1.673	10.964	5.2908	6.7145	0.85059	5.6531	14.702	0	0	0	3.0608	2.5291	2.4049
950	Recyclin-1 OS=Saccharomyces cerevisiae (strain ATCC 204508 / S288c) OX=559292 GN=RCY1 PE=1 SV=4	P39531	97	22.464	0	9.8679	10.582	2.5179	1.7012	0	3.5005	1.0749	0.86554	0	3.0608	1.2645	3.6073
951	Importin alpha re-exporter OS=Saccharomyces cerevisiae (strain ATCC 204508 / S288c) OX=559292 GN=CSE1 PE=1 SV=2	P33307	109	4.7292	0	8.7714	7.9362	4.1966	2.5518	4.8455	7.7011	0	0	0	18.365	2.5291	4.8097
952	Protein SBE2 OS=Saccharomyces cerevisiae (strain ATCC 204508 / S288c) OX=559292 GN=SBE2 PE=1 SV=2	P42223	99	10.641	8.3652	12.061	8.818	0	0	0	0.7001	0	0	0	1.5304	15.174	10.822
953	Twinfilin-1 OS=Saccharomyces cerevisiae (strain ATCC 204508 / S288c) OX=559292 GN=TWF1 PE=1 SV=1	P53250	37	0	0	1.0964	0.8818	15.108	14.46	8.8834	11.902	0	0	0	0	1.2645	1.2024
954	MAP kinase kinase PBS2 OS=Saccharomyces cerevisiae (strain ATCC 204508 / S288c) OX=559292 GN=PBS2 PE=1 SV=4	P08018	73	18.917	8.3652	1.0964	8.818	0	0	0	0	0	0	0	13.774	10.116	13.227
955	Uncharacterized protein YGR122W OS=Saccharomyces cerevisiae (strain ATCC 204508 / S288c) OX=559292 GN=YGR122W PE=4 SV=1	P53272	45	15.37	6.6921	5.4822	16.754	0	0	0	0	0	0	0	12.243	10.116	9.6194
956	Protein MSN5 OS=Saccharomyces cerevisiae (strain ATCC 204508 / S288c) OX=559292 GN=MSN5 PE=1 SV=1	P52918	142	0	0	0	0	10.911	9.3565	16.959	11.202	0	0	0	0	0	0
957	AP-1 complex subunit sigma-1 OS=Saccharomyces cerevisiae (strain ATCC 204508 / S288c) OX=559292 GN=APS1 PE=1 SV=1	P35181	18	7.0938	8.3652	7.675	5.2908	0.83931	1.7012	4.0379	4.9007	1.0749	2.5966	2.6904	7.652	12.645	1.2024
958	Thioredoxin-1 OS=Saccharomyces cerevisiae (strain ATCC 204508 / S288c) OX=559292 GN=TRX1 PE=1 SV=3	P22217	11	7.0938	11.711	12.061	9.6997	0.83931	1.7012	0.80758	2.8004	1.0749	0	0.89679	9.1825	6.3226	8.417
959	Putative carboxymethylenebutenolidase OS=Saccharomyces cerevisiae (strain ATCC 204508 / S288c) OX=559292 GN=YDL086W PE=1 SV=1	Q07505	31	5.9115	8.3652	7.675	4.409	2.5179	0	1.6152	2.8004	0	0.86554	0.89679	13.774	10.116	4.8097
960	RNA 3'-terminal phosphate cyclase-like protein OS=Saccharomyces cerevisiae (strain ATCC 204508 / S288c) OX=559292 GN=RCL1 PE=1 SV=1	Q08096	40	4.7292	5.0191	13.157	0.8818	0.83931	0.85059	0.80758	0	6.4495	2.5966	6.2775	0	17.703	7.2146
961	Negative regulator of sporulation MDS3 OS=Saccharomyces cerevisiae (strain ATCC 204508 / S288c) OX=559292 GN=MDS3 PE=1 SV=2	P53094	167	1.1823	0	1.0964	14.109	7.5538	5.1035	1.6152	9.1013	3.2247	0.86554	4.4839	1.5304	0	0
962	Calcium/calmodulin-dependent protein kinase II OS=Saccharomyces cerevisiae (strain ATCC 204508 / S288c) OX=559292 GN=CMK2 PE=1 SV=2	P22517	50	3.5469	0	2.1929	3.5272	6.7145	6.8047	10.499	8.4012	0	0.86554	1.7936	0	0	2.4049
963	Leucine-rich repeat-containing protein SOG2 OS=Saccharomyces cerevisiae (strain ATCC 204508 / S288c) OX=559292 GN=SOG2 PE=1 SV=1	Q08817	87	16.552	3.3461	2.1929	22.927	1.6786	1.7012	0	2.1003	0	0	0	4.5912	2.5291	3.6073
964	Serine/threonine-protein kinase CLA4 OS=Saccharomyces cerevisiae (strain ATCC 204508 / S288c) OX=559292 GN=CLA4 PE=1 SV=1	P48562	94	13.005	5.0191	7.675	20.281	0	0.85059	0.80758	0.7001	0	0	0	4.5912	7.5872	10.822
965	Protein MMF1, mitochondrial OS=Saccharomyces cerevisiae (strain ATCC 204508 / S288c) OX=559292 GN=MMF1 PE=1 SV=1	P40185	16	10.641	11.711	10.964	8.818	0	0	0	0.7001	0	0.86554	3.5871	13.774	10.116	8.417
966	Uncharacterized protein YLR257W OS=Saccharomyces cerevisiae (strain ATCC 204508 / S288c) OX=559292 GN=YLR257W PE=1 SV=1	Q06146	36	0	0	2.1929	2.6454	9.2324	11.058	12.114	9.8014	0	0.86554	0.89679	0	1.2645	4.8097
967	mRNA-binding protein PUF2 OS=Saccharomyces cerevisiae (strain ATCC 204508 / S288c) OX=559292 GN=PUF2 PE=1 SV=1	Q12221	120	22.464	5.0191	0	12.345	0.83931	0	0	0	1.0749	2.5966	0.89679	4.5912	3.7936	15.632
968	Uncharacterized protein YGR017W OS=Saccharomyces cerevisiae (strain ATCC 204508 / S288c) OX=559292 GN=YGR017W PE=1 SV=1	P53210	35	1.1823	0	0	0	4.1966	8.5059	5.6531	4.2006	7.5244	8.6554	8.0711	0	0	1.2024
969	SNF1 protein kinase subunit beta-3 OS=Saccharomyces cerevisiae (strain ATCC 204508 / S288c) OX=559292 GN=GAL83 PE=1 SV=1	Q04739	47	0	0	0	1.7636	5.0359	7.6553	8.0758	7.001	7.5244	5.1932	7.1743	0	0	0
970	DNA mismatch repair protein MLH1 OS=Saccharomyces cerevisiae (strain ATCC 204508 / S288c) OX=559292 GN=MLH1 PE=1 SV=2	P38920	87	7.0938	3.3461	9.8679	20.281	0	0	0	0.7001	0	0	0	3.0608	16.439	10.822
971	tRNA(Thr) (cytosine(32)-N(3))-methyltransferase OS=Saccharomyces cerevisiae (strain ATCC 204508 / S288c) OX=559292 GN=ABP140 PE=1 SV=3	Q08641	71	0	0	1.0964	0.8818	12.59	10.207	11.306	15.402	0	0	0	0	0	0
972	Pre-rRNA-processing protein PNO1 OS=Saccharomyces cerevisiae (strain ATCC 204508 / S288c) OX=559292 GN=PNO1 PE=1 SV=1	Q99216	30	9.4584	5.0191	7.675	11.463	0.83931	2.5518	4.0379	0.7001	3.2247	0	0	7.652	7.5872	10.822
973	KRR1 small subunit processome component OS=Saccharomyces cerevisiae (strain ATCC 204508 / S288c) OX=559292 GN=KRR1 PE=1 SV=1	P25586	37	2.3646	0	1.0964	6.1726	0.83931	0.85059	1.6152	0	15.049	11.252	7.1743	0	3.7936	3.6073
974	Serine/threonine-protein kinase STE20 OS=Saccharomyces cerevisiae (strain ATCC 204508 / S288c) OX=559292 GN=STE20 PE=1 SV=1	Q03497	102	7.0938	1.673	9.8679	9.6997	3.3572	6.8047	2.4227	6.3009	0	0	0	13.774	2.5291	2.4049
975	Serine/threonine-protein kinase RCK2 OS=Saccharomyces cerevisiae (strain ATCC 204508 / S288c) OX=559292 GN=RCK2 PE=1 SV=3	P38623	68	3.5469	0	1.0964	0.8818	3.3572	9.3565	5.6531	7.7011	6.4495	6.9243	8.0711	0	1.2645	0
976	DNA polymerase delta catalytic subunit OS=Saccharomyces cerevisiae (strain ATCC 204508 / S288c) OX=559292 GN=POL3 PE=1 SV=4	P15436	125	5.9115	3.3461	25.218	7.0544	3.3572	0.85059	2.4227	4.2006	0	0	0	0	1.2645	1.2024
977	mRNA-capping enzyme subunit beta OS=Saccharomyces cerevisiae (strain ATCC 204508 / S288c) OX=559292 GN=CET1 PE=1 SV=2	O13297	62	0	0	0	0	6.7145	8.5059	7.2682	11.202	3.2247	7.7899	2.6904	0	0	0
978	Transmembrane 9 superfamily member 1 OS=Saccharomyces cerevisiae (strain ATCC 204508 / S288c) OX=559292 GN=EMP70 PE=1 SV=2	P32802	76	0	0	0	0	9.2324	12.759	2.4227	10.501	2.1498	4.3277	8.0711	0	0	3.6073
979	Protein kinase MCK1 OS=Saccharomyces cerevisiae (strain ATCC 204508 / S288c) OX=559292 GN=MCK1 PE=1 SV=1	P21965	43	10.641	10.038	9.8679	6.1726	0	0	0	0	0	0	0	15.304	15.174	9.6194
980	FK506-binding protein 1 OS=Saccharomyces cerevisiae (strain ATCC 204508 / S288c) OX=559292 GN=FPR1 PE=1 SV=2	P20081	12	10.641	11.711	8.7714	7.0544	0.83931	0.85059	0	3.5005	1.0749	3.4622	2.6904	6.1216	7.5872	4.8097
981	N-terminal acetyltransferase A complex catalytic subunit ARD1 OS=Saccharomyces cerevisiae (strain ATCC 204508 / S288c) OX=559292 GN=ARD1 PE=1 SV=2	P07347	28	8.2761	10.038	13.157	3.5272	0.83931	0.85059	1.6152	2.1003	0	0.86554	0.89679	6.1216	17.703	8.417
982	Vacuolar protein sorting-associated protein 41 OS=Saccharomyces cerevisiae (strain ATCC 204508 / S288c) OX=559292 GN=VPS41 PE=1 SV=2	P38959	113	24.828	3.3461	3.2893	12.345	0.83931	0	0.80758	1.4002	1.0749	0	0.89679	4.5912	3.7936	8.417
983	Serine/threonine-protein kinase SKY1 OS=Saccharomyces cerevisiae (strain ATCC 204508 / S288c) OX=559292 GN=SKY1 PE=1 SV=1	Q03656	83	2.3646	0	3.2893	5.2908	5.0359	5.1035	8.0758	9.1013	4.2997	5.1932	5.3807	0	0	0
984	Integral membrane protein SED5 OS=Saccharomyces cerevisiae (strain ATCC 204508 / S288c) OX=559292 GN=SED5 PE=1 SV=1	Q01590	39	1.1823	0	0	0	6.7145	5.1035	2.4227	9.1013	4.2997	10.386	12.555	0	0	1.2024
985	DNA-directed RNA polymerase III subunit RPC5 OS=Saccharomyces cerevisiae (strain ATCC 204508 / S288c) OX=559292 GN=RPC37 PE=1 SV=1	P36121	32	0	0	0	0	4.1966	5.9541	4.0379	4.9007	15.049	12.118	8.9679	0	0	1.2024
986	Vacuolar protein sorting-associated protein 74 OS=Saccharomyces cerevisiae (strain ATCC 204508 / S288c) OX=559292 GN=VPS74 PE=1 SV=1	Q06385	39	0	0	0	0	7.5538	5.9541	13.729	9.8014	2.1498	4.3277	4.4839	0	0	0
987	Methylenetetrahydrofolate reductase 2 OS=Saccharomyces cerevisiae (strain ATCC 204508 / S288c) OX=559292 GN=MET13 PE=1 SV=2	P53128	69	0	0	0	0	5.0359	6.8047	10.499	9.1013	6.4495	8.6554	8.0711	0	0	0
988	ADP-ribosylation factor GTPase-activating protein GCS1 OS=Saccharomyces cerevisiae (strain ATCC 204508 / S288c) OX=559292 GN=GCS1 PE=1 SV=1	P35197	39	14.188	5.0191	2.1929	5.2908	1.6786	1.7012	1.6152	9.1013	1.0749	6.0588	5.3807	3.0608	2.5291	2.4049
989	Ribonuclease P/MRP protein subunit RPP1 OS=Saccharomyces cerevisiae (strain ATCC 204508 / S288c) OX=559292 GN=RPP1 PE=1 SV=1	P38786	32	5.9115	1.673	8.7714	4.409	1.6786	2.5518	2.4227	4.2006	6.4495	6.9243	6.2775	0	2.5291	3.6073
990	Glycine cleavage system H protein, mitochondrial OS=Saccharomyces cerevisiae (strain ATCC 204508 / S288c) OX=559292 GN=GCV3 PE=1 SV=3	P39726	19	1.1823	3.3461	5.4822	2.6454	8.3931	7.6553	8.8834	8.4012	0	1.7311	0.89679	1.5304	2.5291	6.0121
991	Phosducin-like protein 2 OS=Saccharomyces cerevisiae (strain ATCC 204508 / S288c) OX=559292 GN=PLP2 PE=1 SV=1	Q12017	33	1.1823	1.673	0	0.8818	12.59	6.8047	10.499	6.3009	3.2247	2.5966	1.7936	0	0	1.2024
992	60S ribosomal export protein NMD3 OS=Saccharomyces cerevisiae (strain ATCC 204508 / S288c) OX=559292 GN=NMD3 PE=1 SV=3	P38861	59	0	0	1.0964	0	0.83931	0.85059	0.80758	0.7001	24.723	11.252	15.245	4.5912	1.2645	1.2024
993	SEC14 cytosolic factor OS=Saccharomyces cerevisiae (strain ATCC 204508 / S288c) OX=559292 GN=SEC14 PE=1 SV=3	P24280	35	9.4584	6.6921	7.675	5.2908	0	0	0	6.3009	0	1.7311	2.6904	7.652	10.116	6.0121
994	E3 ubiquitin-protein ligase listerin OS=Saccharomyces cerevisiae (strain ATCC 204508 / S288c) OX=559292 GN=RKR1 PE=1 SV=1	Q04781	180	1.1823	0	0	0.8818	0	0	4.0379	5.6008	21.498	7.7899	9.8647	0	1.2645	2.4049
995	RNA annealing protein YRA2 OS=Saccharomyces cerevisiae (strain ATCC 204508 / S288c) OX=559292 GN=YRA2 PE=1 SV=1	P36036	24	8.2761	11.711	6.5786	5.2908	0	0	0	0	0	0.86554	0	9.1825	15.174	9.6194
996	U3 small nucleolar RNA-associated protein 25 OS=Saccharomyces cerevisiae (strain ATCC 204508 / S288c) OX=559292 GN=UTP25 PE=1 SV=1	P40498	84	0	0	1.0964	0	4.1966	5.9541	4.8455	2.8004	13.974	10.386	8.9679	0	0	0
997	Protein SSP120 OS=Saccharomyces cerevisiae (strain ATCC 204508 / S288c) OX=559292 GN=SSP120 PE=1 SV=1	P39931	27	1.1823	0	0	0	5.8752	5.9541	2.4227	3.5005	7.5244	13.849	13.452	0	0	0
998	Beta-glucan synthesis-associated protein KRE6 OS=Saccharomyces cerevisiae (strain ATCC 204508 / S288c) OX=559292 GN=KRE6 PE=1 SV=2	P32486	80	0	0	0	0	5.0359	4.253	4.8455	11.202	2.1498	10.386	11.658	0	0	0
999	Protein CMS1 OS=Saccharomyces cerevisiae (strain ATCC 204508 / S288c) OX=559292 GN=CMS1 PE=1 SV=1	Q07897	33	7.0938	5.0191	5.4822	4.409	0	0	0	0	0	0	0	12.243	21.497	15.632
1000	Nucleolar protein 9 OS=Saccharomyces cerevisiae (strain ATCC 204508 / S288c) OX=559292 GN=NOP9 PE=1 SV=1	P47077	78	0	0	10.964	7.0544	0	0	0	0	0	0	0	10.713	17.703	18.036
1001	mRNA 3'-end-processing protein RNA14 OS=Saccharomyces cerevisiae (strain ATCC 204508 / S288c) OX=559292 GN=RNA14 PE=1 SV=2	P25298	80	0	0	0	1.7636	7.5538	10.207	12.114	14.002	0	0	0	0	0	0
1002	Ubiquitin-like protein SMT3 OS=Saccharomyces cerevisiae (strain ATCC 204508 / S288c) OX=559292 GN=SMT3 PE=1 SV=1	Q12306	12	2.3646	6.6921	3.2893	2.6454	4.1966	2.5518	5.6531	4.9007	0	2.5966	0.89679	6.1216	3.7936	4.8097
1003	Uracil phosphoribosyltransferase OS=Saccharomyces cerevisiae (strain ATCC 204508 / S288c) OX=559292 GN=FUR1 PE=1 SV=2	P18562	25	5.9115	8.3652	6.5786	6.1726	4.1966	4.253	3.2303	3.5005	0	0	1.7936	9.1825	8.8517	4.8097
1004	60S ribosomal protein L25 OS=Saccharomyces cerevisiae (strain ATCC 204508 / S288c) OX=559292 GN=RPL25 PE=1 SV=4	P04456	16	2.3646	3.3461	2.1929	3.5272	0	0	2.4227	1.4002	9.6742	9.5209	14.349	4.5912	5.0581	6.0121
1005	WD repeat-containing protein JIP5 OS=Saccharomyces cerevisiae (strain ATCC 204508 / S288c) OX=559292 GN=JIP5 PE=1 SV=2	Q06214	55	2.3646	5.0191	6.5786	4.409	0	2.5518	3.2303	1.4002	16.124	6.9243	8.0711	0	1.2645	2.4049
1006	Protein SBE22 OS=Saccharomyces cerevisiae (strain ATCC 204508 / S288c) OX=559292 GN=SBE22 PE=1 SV=1	P38814	96	14.188	11.711	0	12.345	0.83931	0.85059	0	2.8004	2.1498	1.7311	0	3.0608	3.7936	7.2146
1007	La protein homolog OS=Saccharomyces cerevisiae (strain ATCC 204508 / S288c) OX=559292 GN=LHP1 PE=1 SV=2	P33399	32	2.3646	5.0191	7.675	4.409	5.0359	5.9541	7.2682	7.001	0	0	0	3.0608	6.3226	2.4049
1008	Hsp90 co-chaperone HCH1 OS=Saccharomyces cerevisiae (strain ATCC 204508 / S288c) OX=559292 GN=HCH1 PE=1 SV=1	P53834	17	2.3646	3.3461	4.3857	3.5272	8.3931	5.9541	6.4607	8.4012	0	0	0	3.0608	1.2645	6.0121
1009	H/ACA ribonucleoprotein complex subunit GAR1 OS=Saccharomyces cerevisiae (strain ATCC 204508 / S288c) OX=559292 GN=GAR1 PE=1 SV=1	P28007	21	1.1823	0	0	0	1.6786	1.7012	3.2303	0.7001	15.049	15.58	15.245	1.5304	1.2645	0
1010	Ankyrin repeat-containing protein YAR1 OS=Saccharomyces cerevisiae (strain ATCC 204508 / S288c) OX=559292 GN=YAR1 PE=1 SV=1	P46683	22	0	1.673	2.1929	1.7636	6.7145	7.6553	12.921	10.501	0	1.7311	1.7936	0	0	0
1011	Histone deacetylase HDA1 OS=Saccharomyces cerevisiae (strain ATCC 204508 / S288c) OX=559292 GN=HDA1 PE=1 SV=1	P53973	80	0	0	0	0	10.072	11.908	12.114	9.8014	0	2.5966	0.89679	1.5304	0	0
1012	F-actin-capping protein subunit beta OS=Saccharomyces cerevisiae (strain ATCC 204508 / S288c) OX=559292 GN=CAP2 PE=1 SV=3	P13517	33	0	0	1.0964	0	10.911	10.207	10.499	9.8014	0	0.86554	0.89679	0	0	0
1013	ER-derived vesicles protein ERV41 OS=Saccharomyces cerevisiae (strain ATCC 204508 / S288c) OX=559292 GN=ERV41 PE=1 SV=1	Q04651	41	0	0	0	0	7.5538	7.6553	1.6152	6.3009	7.5244	9.5209	12.555	0	0	0
1014	Ribosome quality control complex subunit 1 OS=Saccharomyces cerevisiae (strain ATCC 204508 / S288c) OX=559292 GN=RQC1 PE=1 SV=1	Q05468	83	1.1823	0	0	0	0	0	0	0	22.573	12.983	13.452	0	0	0
1015	Origin recognition complex subunit 4 OS=Saccharomyces cerevisiae (strain ATCC 204508 / S288c) OX=559292 GN=ORC4 PE=1 SV=1	P54791	61	7.0938	0	10.964	14.109	0.83931	0.85059	1.6152	1.4002	2.1498	3.4622	1.7936	1.5304	3.7936	7.2146
1016	Ubiquitin ligase-binding protein BUL2 OS=Saccharomyces cerevisiae (strain ATCC 204508 / S288c) OX=559292 GN=BUL2 PE=1 SV=1	Q03758	105	11.823	1.673	2.1929	13.227	3.3572	2.5518	0	5.6008	0	2.5966	1.7936	1.5304	3.7936	2.4049
1017	Protein VMS1 OS=Saccharomyces cerevisiae (strain ATCC 204508 / S288c) OX=559292 GN=VMS1 PE=1 SV=1	Q04311	73	4.7292	5.0191	2.1929	5.2908	3.3572	5.9541	4.8455	4.2006	1.0749	0	0	4.5912	6.3226	6.0121
1018	Uncharacterized protein YNR029C OS=Saccharomyces cerevisiae (strain ATCC 204508 / S288c) OX=559292 GN=YNR029C PE=1 SV=1	P53729	48	5.9115	0	2.1929	7.9362	0.83931	0	0.80758	2.1003	0	3.4622	4.4839	19.895	12.645	10.822
1019	Protein WHI3 OS=Saccharomyces cerevisiae (strain ATCC 204508 / S288c) OX=559292 GN=WHI3 PE=1 SV=1	P34761	71	14.188	1.673	1.0964	14.109	0	0	0	0.7001	4.2997	7.7899	5.3807	3.0608	2.5291	6.0121
1020	RNA-binding protein PIN4 OS=Saccharomyces cerevisiae (strain ATCC 204508 / S288c) OX=559292 GN=PIN4 PE=1 SV=1	P34217	74	1.1823	1.673	1.0964	7.0544	8.3931	7.6553	0	10.501	1.0749	6.0588	6.2775	1.5304	0	0
1021	Nucleoporin NUP60 OS=Saccharomyces cerevisiae (strain ATCC 204508 / S288c) OX=559292 GN=NUP60 PE=1 SV=1	P39705	59	0	0	0	5.2908	4.1966	6.8047	1.6152	11.902	1.0749	6.9243	6.2775	0	3.7936	3.6073
1022	Ribosome biogenesis protein YTM1 OS=Saccharomyces cerevisiae (strain ATCC 204508 / S288c) OX=559292 GN=YTM1 PE=1 SV=1	Q12024	51	0	0	5.4822	0	2.5179	0.85059	4.8455	4.9007	9.6742	11.252	12.555	0	0	1.2024
1023	Protein JLP2 OS=Saccharomyces cerevisiae (strain ATCC 204508 / S288c) OX=559292 GN=JLP2 PE=1 SV=2	P40206	25	9.4584	8.3652	7.675	7.0544	0	0	0	0	0	0	0	7.652	18.968	10.822
1024	Fork head protein homolog 2 OS=Saccharomyces cerevisiae (strain ATCC 204508 / S288c) OX=559292 GN=FKH2 PE=1 SV=1	P41813	94	8.2761	3.3461	0	15.872	0	0	0	0	0	0	0	1.5304	17.703	10.822
1025	GTP-binding protein YPT32/YPT11 OS=Saccharomyces cerevisiae (strain ATCC 204508 / S288c) OX=559292 GN=YPT32 PE=1 SV=3	P51996	25	5.9115	0	9.8679	0	5.0359	0	4.8455	7.7011	0	0	0	0	0	0
1026	Mitogen-activated protein kinase FUS3 OS=Saccharomyces cerevisiae (strain ATCC 204508 / S288c) OX=559292 GN=FUS3 PE=1 SV=2	P16892	41	9.4584	8.3652	7.675	5.2908	0.83931	1.7012	1.6152	2.8004	1.0749	1.7311	0.89679	9.1825	10.116	8.417
1027	60S ribosomal protein L30 OS=Saccharomyces cerevisiae (strain ATCC 204508 / S288c) OX=559292 GN=RPL30 PE=1 SV=3	P14120	11	5.9115	13.384	7.675	6.1726	0	0	0.80758	0.7001	0	1.7311	2.6904	10.713	10.116	6.0121
1028	Casein kinase II subunit beta OS=Saccharomyces cerevisiae (strain ATCC 204508 / S288c) OX=559292 GN=CKB1 PE=1 SV=1	P43639	32	1.1823	0	1.0964	0.8818	5.0359	6.8047	6.4607	6.3009	9.6742	6.9243	7.1743	0	1.2645	0
1029	Vacuolar import and degradation protein 30 OS=Saccharomyces cerevisiae (strain ATCC 204508 / S288c) OX=559292 GN=VID30 PE=1 SV=1	P53076	108	0	0	0	6.1726	2.5179	1.7012	12.114	6.3009	4.2997	5.1932	7.1743	0	0	0
1030	Phospholipid-transporting ATPase DNF1 OS=Saccharomyces cerevisiae (strain ATCC 204508 / S288c) OX=559292 GN=DNF1 PE=1 SV=2	P32660	178	0	0	0	0	5.8752	1.7012	2.4227	6.3009	2.1498	16.445	16.142	0	0	0
1031	Inclusion body clearance protein IML2 OS=Saccharomyces cerevisiae (strain ATCC 204508 / S288c) OX=559292 GN=IML2 PE=1 SV=1	P47031	83	5.9115	1.673	0	0.8818	11.75	6.8047	1.6152	14.002	0	0	0	0	0	0
1032	Imidazole glycerol phosphate synthase hisHF OS=Saccharomyces cerevisiae (strain ATCC 204508 / S288c) OX=559292 GN=HIS7 PE=1 SV=2	P33734	61	0	0	9.8679	2.6454	8.3931	4.253	10.499	10.501	0	0	0	0	0	0
1033	V-type proton ATPase subunit a, Golgi isoform OS=Saccharomyces cerevisiae (strain ATCC 204508 / S288c) OX=559292 GN=STV1 PE=1 SV=2	P37296	102	0	0	0	0	7.5538	3.4024	1.6152	4.9007	2.1498	11.252	12.555	0	0	0
1034	Pre-mRNA-splicing factor ATP-dependent RNA helicase PRP16 OS=Saccharomyces cerevisiae (strain ATCC 204508 / S288c) OX=559292 GN=PRP16 PE=1 SV=2	P15938	122	11.823	10.038	0	15.872	0	0	0	0	0	0	0	6.1216	8.8517	7.2146
1035	rRNA-processing protein EBP2 OS=Saccharomyces cerevisiae (strain ATCC 204508 / S288c) OX=559292 GN=EBP2 PE=1 SV=1	P36049	50	0	0	0	0	0	0	0.80758	0	18.274	19.042	11.658	0	0	0
1036	Exosome complex component RRP4 OS=Saccharomyces cerevisiae (strain ATCC 204508 / S288c) OX=559292 GN=RRP4 PE=1 SV=1	P38792	39	1.1823	0	1.0964	1.7636	8.3931	7.6553	8.0758	7.001	5.3746	2.5966	2.6904	1.5304	0	2.4049
1037	Mediator of RNA polymerase II transcription subunit 5 OS=Saccharomyces cerevisiae (strain ATCC 204508 / S288c) OX=559292 GN=NUT1 PE=1 SV=1	P53114	129	5.9115	1.673	2.1929	14.991	3.3572	2.5518	4.8455	5.6008	1.0749	0	0.89679	6.1216	0	4.8097
1038	Protein PBP4 OS=Saccharomyces cerevisiae (strain ATCC 204508 / S288c) OX=559292 GN=PBP4 PE=1 SV=1	Q07362	20	3.5469	10.038	6.5786	6.1726	0	0	0	0.7001	2.1498	4.3277	6.2775	7.652	10.116	12.024
1039	Uncharacterized protein YDR239C OS=Saccharomyces cerevisiae (strain ATCC 204508 / S288c) OX=559292 GN=YDR239C PE=1 SV=1	Q03780	86	1.1823	0	3.2893	0.8818	0.83931	0	0	0.7001	1.0749	4.3277	2.6904	0	39.2	6.0121
1040	Serine/threonine-protein kinase KIC1 OS=Saccharomyces cerevisiae (strain ATCC 204508 / S288c) OX=559292 GN=KIC1 PE=1 SV=1	P38692	117	13.005	5.0191	1.0964	18.518	2.5179	2.5518	0	2.8004	0	0	0	4.5912	0	1.2024
1041	Thioredoxin-2 OS=Saccharomyces cerevisiae (strain ATCC 204508 / S288c) OX=559292 GN=TRX2 PE=1 SV=3	P22803	11	7.0938	13.384	8.7714	7.9362	0	0	0	2.1003	0	0	1.7936	10.713	8.8517	6.0121
1042	rDNA transcriptional regulator POL5 OS=Saccharomyces cerevisiae (strain ATCC 204508 / S288c) OX=559292 GN=POL5 PE=1 SV=1	P39985	116	0	0	0	0	0.83931	2.5518	3.2303	0.7001	16.124	11.252	13.452	0	0	1.2024
1043	Nuclear protein localization protein 4 OS=Saccharomyces cerevisiae (strain ATCC 204508 / S288c) OX=559292 GN=NPL4 PE=1 SV=1	P33755	66	0	0	1.0964	0	10.911	8.5059	12.114	11.902	1.0749	1.7311	0.89679	0	0	0
1044	Probable phospholipid-transporting ATPase NEO1 OS=Saccharomyces cerevisiae (strain ATCC 204508 / S288c) OX=559292 GN=NEO1 PE=1 SV=1	P40527	130	0	0	0	0	6.7145	4.253	2.4227	10.501	2.1498	12.118	10.761	0	0	0
1045	CDC48-associated ubiquitin-like/zinc finger protein 1 OS=Saccharomyces cerevisiae (strain ATCC 204508 / S288c) OX=559292 GN=CUZ1 PE=1 SV=1	P53899	32	7.0938	10.038	12.061	6.1726	0	0	0	0	0	0	0	10.713	12.645	9.6194
1046	60S ribosome subunit biogenesis protein NOP8 OS=Saccharomyces cerevisiae (strain ATCC 204508 / S288c) OX=559292 GN=NOP8 PE=1 SV=1	Q08287	57	0	0	0	0	0	0	0.80758	0	15.049	19.907	17.039	0	1.2645	2.4049
1047	Endoribonuclease YSH1 OS=Saccharomyces cerevisiae (strain ATCC 204508 / S288c) OX=559292 GN=YSH1 PE=1 SV=1	Q06224	88	0	3.3461	1.0964	2.6454	4.1966	4.253	5.6531	7.7011	7.5244	4.3277	3.5871	1.5304	2.5291	1.2024
1048	Protoplast secreted protein 2 OS=Saccharomyces cerevisiae (strain ATCC 204508 / S288c) OX=559292 GN=PST2 PE=1 SV=1	Q12335	21	8.2761	3.3461	5.4822	4.409	3.3572	2.5518	3.2303	6.3009	0	0.86554	1.7936	7.652	8.8517	6.0121
1049	Cysteine desulfurase, mitochondrial OS=Saccharomyces cerevisiae (strain ATCC 204508 / S288c) OX=559292 GN=NFS1 PE=1 SV=2	P25374	54	3.5469	0	6.5786	3.5272	6.7145	5.9541	7.2682	6.3009	0	2.5966	2.6904	1.5304	0	1.2024
1050	Transcriptional regulatory protein LGE1 OS=Saccharomyces cerevisiae (strain ATCC 204508 / S288c) OX=559292 GN=LGE1 PE=1 SV=1	Q02796	37	10.641	11.711	3.2893	3.5272	0.83931	0.85059	0.80758	0	0	0.86554	0.89679	12.243	15.174	10.822
1051	Adenylate kinase isoenzyme 6 homolog FAP7 OS=Saccharomyces cerevisiae (strain ATCC 204508 / S288c) OX=559292 GN=FAP7 PE=1 SV=1	Q12055	23	2.3646	0	2.1929	1.7636	5.0359	6.8047	4.0379	4.2006	6.4495	8.6554	6.2775	6.1216	0	0
1052	Co-chaperone protein SBA1 OS=Saccharomyces cerevisiae (strain ATCC 204508 / S288c) OX=559292 GN=SBA1 PE=1 SV=3	P28707	24	3.5469	1.673	4.3857	2.6454	8.3931	9.3565	8.8834	5.6008	0	0	0	1.5304	1.2645	1.2024
1053	2-(3-amino-3-carboxypropyl)histidine synthase subunit 2 OS=Saccharomyces cerevisiae (strain ATCC 204508 / S288c) OX=559292 GN=DPH2 PE=1 SV=1	P32461	60	0	0	0	4.409	5.8752	7.6553	7.2682	9.1013	0	0.86554	0	9.1825	1.2645	3.6073
1054	Protein NRD1 OS=Saccharomyces cerevisiae (strain ATCC 204508 / S288c) OX=559292 GN=NRD1 PE=1 SV=1	P53617	64	0	0	0	0	0.83931	0.85059	1.6152	1.4002	19.348	12.983	12.555	1.5304	0	0
1055	Protein EAP1 OS=Saccharomyces cerevisiae (strain ATCC 204508 / S288c) OX=559292 GN=EAP1 PE=1 SV=1	P36041	70	9.4584	10.038	7.675	9.6997	0	0.85059	0	0.7001	0	0	0	0	8.8517	7.2146
1056	ATP-dependent permease PDR15 OS=Saccharomyces cerevisiae (strain ATCC 204508 / S288c) OX=559292 GN=PDR15 PE=1 SV=1	Q04182	172	0	0	4.3857	0	5.0359	4.253	0	0	2.1498	1.7311	0	0	2.5291	1.2024
1057	10 heat shock protein, mitochondrial OS=Saccharomyces cerevisiae (strain ATCC 204508 / S288c) OX=559292 GN=HSP10 PE=1 SV=1	P38910	11	7.0938	11.711	6.5786	3.5272	1.6786	0.85059	6.4607	1.4002	0	0.86554	1.7936	4.5912	6.3226	3.6073
1058	Potassium-activated aldehyde dehydrogenase, mitochondrial OS=Saccharomyces cerevisiae (strain ATCC 204508 / S288c) OX=559292 GN=ALD4 PE=1 SV=2	P46367	57	15.37	1.673	6.5786	13.227	2.5179	0.85059	1.6152	2.8004	0	0	0	1.5304	5.0581	4.8097
1059	Alcohol dehydrogenase 3, mitochondrial OS=Saccharomyces cerevisiae (strain ATCC 204508 / S288c) OX=559292 GN=ADH3 PE=1 SV=2	P07246	40	5.9115	5.0191	10.964	6.1726	3.3572	0	0	1.4002	0	0.86554	2.6904	0	5.0581	3.6073
1060	mRNA-capping enzyme subunit alpha OS=Saccharomyces cerevisiae (strain ATCC 204508 / S288c) OX=559292 GN=CEG1 PE=1 SV=2	Q01159	53	1.1823	0	1.0964	0	8.3931	7.6553	3.2303	8.4012	4.2997	6.9243	4.4839	0	0	0
1061	Minichromosome maintenance protein 5 OS=Saccharomyces cerevisiae (strain ATCC 204508 / S288c) OX=559292 GN=MCM5 PE=1 SV=1	P29496	86	3.5469	0	13.157	2.6454	5.8752	5.9541	7.2682	7.7011	0	0	0.89679	1.5304	0	0
1062	Sorting nexin MVP1 OS=Saccharomyces cerevisiae (strain ATCC 204508 / S288c) OX=559292 GN=MVP1 PE=1 SV=2	P40959	60	1.1823	0	0	4.409	7.5538	9.3565	11.306	7.001	0	0	0	0	0	1.2024
1063	General transcription and DNA repair factor IIH helicase subunit XPB OS=Saccharomyces cerevisiae (strain ATCC 204508 / S288c) OX=559292 GN=SSL2 PE=1 SV=1	Q00578	95	0	0	0	0	5.0359	5.1035	10.499	5.6008	10.749	6.0588	5.3807	0	0	0
1064	Karyogamy protein KAR9 OS=Saccharomyces cerevisiae (strain ATCC 204508 / S288c) OX=559292 GN=KAR9 PE=1 SV=2	P32526	74	3.5469	6.6921	0	14.991	0	0	0	0	0	0	0	7.652	12.645	15.632
1065	Pre-rRNA-processing protein RIX1 OS=Saccharomyces cerevisiae (strain ATCC 204508 / S288c) OX=559292 GN=RIX1 PE=1 SV=2	P38883	87	0	1.673	0	0	0	0	0.80758	0	21.498	12.118	16.142	0	0	0
1066	Ribosomal RNA-processing protein 15 OS=Saccharomyces cerevisiae (strain ATCC 204508 / S288c) OX=559292 GN=RRP15 PE=1 SV=1	Q06511	28	0	0	0	0	0	0	0	0	16.124	18.176	13.452	0	1.2645	0
1067	COMPASS component SWD2 OS=Saccharomyces cerevisiae (strain ATCC 204508 / S288c) OX=559292 GN=SWD2 PE=1 SV=1	P36104	37	2.3646	1.673	2.1929	6.1726	1.6786	3.4024	4.0379	6.3009	2.1498	1.7311	3.5871	4.5912	6.3226	6.0121
1068	Conserved oligomeric Golgi complex subunit 5 OS=Saccharomyces cerevisiae (strain ATCC 204508 / S288c) OX=559292 GN=COG5 PE=1 SV=1	P53951	46	5.9115	0	4.3857	7.9362	2.5179	1.7012	3.2303	4.2006	1.0749	1.7311	1.7936	1.5304	0	3.6073
1069	Peptidyl-prolyl cis-trans isomerase CPR6 OS=Saccharomyces cerevisiae (strain ATCC 204508 / S288c) OX=559292 GN=CPR6 PE=1 SV=1	P53691	42	4.7292	5.0191	12.061	5.2908	1.6786	0	8.8834	3.5005	1.0749	1.7311	0.89679	0	5.0581	2.4049
1070	Cytochrome b-c1 complex subunit 1, mitochondrial OS=Saccharomyces cerevisiae (strain ATCC 204508 / S288c) OX=559292 GN=COR1 PE=1 SV=1	P07256	50	8.2761	1.673	3.2893	10.582	1.6786	0	1.6152	5.6008	0	5.1932	3.5871	3.0608	2.5291	6.0121
1071	Proteasome subunit beta type-3 OS=Saccharomyces cerevisiae (strain ATCC 204508 / S288c) OX=559292 GN=PUP3 PE=1 SV=1	P25451	23	1.1823	0	1.0964	0.8818	6.7145	5.9541	4.8455	7.001	7.5244	6.9243	6.2775	1.5304	0	0
1072	Phosphopantothenoylcysteine decarboxylase subunit SIS2 OS=Saccharomyces cerevisiae (strain ATCC 204508 / S288c) OX=559292 GN=SIS2 PE=1 SV=1	P36024	62	1.1823	0	0	0.8818	5.0359	4.253	0.80758	4.9007	6.4495	10.386	8.0711	0	2.5291	0
1073	Asparagine-rich protein OS=Saccharomyces cerevisiae (strain ATCC 204508 / S288c) OX=559292 GN=NRP1 PE=1 SV=2	P32770	79	13.005	3.3461	0	14.991	2.5179	1.7012	0	2.8004	0	0	0.89679	4.5912	1.2645	1.2024
1074	Sulfate adenylyltransferase OS=Saccharomyces cerevisiae (strain ATCC 204508 / S288c) OX=559292 GN=MET3 PE=1 SV=2	P08536	58	4.7292	1.673	8.7714	4.409	4.1966	5.9541	4.8455	3.5005	0	0	0	1.5304	0	6.0121
1075	Phospho-2-dehydro-3-deoxyheptonate aldolase, tyrosine-inhibited OS=Saccharomyces cerevisiae (strain ATCC 204508 / S288c) OX=559292 GN=ARO4 PE=1 SV=2	P32449	40	4.7292	10.038	13.157	5.2908	0	0	0	0.7001	0	1.7311	1.7936	10.713	12.645	4.8097
1076	Peptidyl-prolyl cis-trans isomerase D OS=Saccharomyces cerevisiae (strain ATCC 204508 / S288c) OX=559292 GN=CPR5 PE=2 SV=1	P35176	25	1.1823	0	5.4822	4.409	5.8752	6.8047	9.691	9.1013	0	0	0	0	2.5291	1.2024
1077	A-factor-processing enzyme OS=Saccharomyces cerevisiae (strain ATCC 204508 / S288c) OX=559292 GN=STE23 PE=1 SV=2	Q06010	118	1.1823	0	5.4822	2.6454	10.072	3.4024	8.8834	12.602	0	0	0	0	0	0
1078	Protein PTI1 OS=Saccharomyces cerevisiae (strain ATCC 204508 / S288c) OX=559292 GN=PTI1 PE=1 SV=2	P39927	47	1.1823	0	1.0964	5.2908	1.6786	4.253	2.4227	3.5005	4.2997	8.6554	4.4839	0	7.5872	3.6073
1079	Oxysterol-binding protein homolog 4 OS=Saccharomyces cerevisiae (strain ATCC 204508 / S288c) OX=559292 GN=KES1 PE=1 SV=1	P35844	49	3.5469	5.0191	5.4822	3.5272	6.7145	2.5518	4.0379	4.9007	0	0	0	1.5304	6.3226	4.8097
1080	Putative Xaa-Pro aminopeptidase FRA1 OS=Saccharomyces cerevisiae (strain ATCC 204508 / S288c) OX=559292 GN=FRA1 PE=1 SV=1	Q07825	85	9.4584	10.038	4.3857	3.5272	5.0359	2.5518	3.2303	4.9007	0	0	0	0	2.5291	2.4049
1081	2-(3-amino-3-carboxypropyl)histidine synthase subunit 1 OS=Saccharomyces cerevisiae (strain ATCC 204508 / S288c) OX=559292 GN=DPH1 PE=1 SV=1	P40487	48	3.5469	1.673	5.4822	3.5272	5.8752	11.058	5.6531	6.3009	0	0	0	0	0	2.4049
1082	Exocyst complex component SEC6 OS=Saccharomyces cerevisiae (strain ATCC 204508 / S288c) OX=559292 GN=SEC6 PE=1 SV=2	P32844	93	0	0	0	1.7636	5.0359	4.253	6.4607	10.501	4.2997	3.4622	2.6904	0	0	0
1083	F-actin-capping protein subunit alpha OS=Saccharomyces cerevisiae (strain ATCC 204508 / S288c) OX=559292 GN=CAP1 PE=1 SV=1	P28495	31	2.3646	0	3.2893	3.5272	10.072	7.6553	8.8834	7.001	0	0	0	0	0	1.2024
1084	Phosphoglucomutase 1 OS=Saccharomyces cerevisiae (strain ATCC 204508 / S288c) OX=559292 GN=PGM1 PE=1 SV=1	P33401	63	3.5469	1.673	7.675	4.409	0.83931	0.85059	8.0758	2.1003	9.6742	2.5966	3.5871	3.0608	5.0581	2.4049
1085	Sterol 3-beta-glucosyltransferase OS=Saccharomyces cerevisiae (strain ATCC 204508 / S288c) OX=559292 GN=ATG26 PE=1 SV=1	Q06321	136	10.641	1.673	0	12.345	1.6786	1.7012	2.4227	4.9007	2.1498	0.86554	0	7.652	2.5291	1.2024
1086	ATF/CREB activator 2 OS=Saccharomyces cerevisiae (strain ATCC 204508 / S288c) OX=559292 GN=CST6 PE=1 SV=1	P40535	65	7.0938	3.3461	0	9.6997	4.1966	2.5518	0	2.8004	1.0749	2.5966	1.7936	12.243	6.3226	4.8097
1087	Chorismate synthase OS=Saccharomyces cerevisiae (strain ATCC 204508 / S288c) OX=559292 GN=ARO2 PE=1 SV=1	P28777	41	5.9115	8.3652	13.157	12.345	1.6786	0.85059	1.6152	2.1003	0	0	0.89679	1.5304	2.5291	2.4049
1088	Chromatin structure-remodeling complex protein RSC3 OS=Saccharomyces cerevisiae (strain ATCC 204508 / S288c) OX=559292 GN=RSC3 PE=1 SV=1	Q06639	102	1.1823	3.3461	0	2.6454	0	0	0.80758	0	1.0749	4.3277	3.5871	18.365	8.8517	12.024
1089	Transcription initiation factor IIF subunit beta OS=Saccharomyces cerevisiae (strain ATCC 204508 / S288c) OX=559292 GN=TFG2 PE=1 SV=2	P41896	47	1.1823	1.673	0	0.8818	7.5538	6.8047	8.8834	5.6008	3.2247	0.86554	0	0	0	1.2024
1090	Fe-S cluster assembly protein DRE2 OS=Saccharomyces cerevisiae (strain ATCC 204508 / S288c) OX=559292 GN=DRE2 PE=1 SV=1	P36152	39	0	0	2.1929	1.7636	3.3572	8.5059	1.6152	5.6008	7.5244	7.7899	8.9679	0	0	0
1091	Protein SCD5 OS=Saccharomyces cerevisiae (strain ATCC 204508 / S288c) OX=559292 GN=SCD5 PE=1 SV=1	P34758	97	15.37	1.673	5.4822	19.399	0	0.85059	0	1.4002	0	0	0	0	1.2645	6.0121
1092	Putative oxidoreductase TDA3 OS=Saccharomyces cerevisiae (strain ATCC 204508 / S288c) OX=559292 GN=TDA3 PE=1 SV=2	P38758	58	0	0	2.1929	0	3.3572	7.6553	9.691	7.7011	1.0749	4.3277	3.5871	0	0	0
1093	Protein PAR32 OS=Saccharomyces cerevisiae (strain ATCC 204508 / S288c) OX=559292 GN=PAR32 PE=1 SV=1	Q12515	32	8.2761	13.384	1.0964	10.582	0	0	0	0	0	0	0	7.652	12.645	12.024
1094	Superkiller protein 3 OS=Saccharomyces cerevisiae (strain ATCC 204508 / S288c) OX=559292 GN=SKI3 PE=1 SV=2	P17883	164	0	0	0	0	5.0359	4.253	8.0758	2.8004	0	10.386	8.9679	0	0	0
1095	Glucose-repressible alcohol dehydrogenase transcriptional effector OS=Saccharomyces cerevisiae (strain ATCC 204508 / S288c) OX=559292 GN=CCR4 PE=1 SV=2	P31384	95	0	0	1.0964	14.991	0.83931	0.85059	2.4227	5.6008	1.0749	0.86554	2.6904	6.1216	0	2.4049
1096	Actin-related protein 2/3 complex subunit 4 OS=Saccharomyces cerevisiae (strain ATCC 204508 / S288c) OX=559292 GN=ARC19 PE=1 SV=2	P33204	20	3.5469	6.6921	4.3857	3.5272	6.7145	3.4024	4.0379	5.6008	0	0	0.89679	6.1216	3.7936	7.2146
1097	Histone H2A.2 OS=Saccharomyces cerevisiae (strain ATCC 204508 / S288c) OX=559292 GN=HTA2 PE=1 SV=2	P04912	14	3.5469	5.0191	3.2893	2.6454	0	0.85059	0.80758	0	7.5244	6.9243	8.0711	4.5912	5.0581	2.4049
1098	DNA primase small subunit OS=Saccharomyces cerevisiae (strain ATCC 204508 / S288c) OX=559292 GN=PRI1 PE=1 SV=2	P10363	48	5.9115	3.3461	7.675	6.1726	0.83931	0.85059	1.6152	0.7001	0	0	0	0	8.8517	3.6073
1099	Rab guanine nucleotide exchange factor SEC2 OS=Saccharomyces cerevisiae (strain ATCC 204508 / S288c) OX=559292 GN=SEC2 PE=1 SV=1	P17065	85	3.5469	0	2.1929	3.5272	4.1966	6.8047	7.2682	8.4012	0	1.7311	3.5871	0	1.2645	0
1100	Chromatin structure-remodeling complex subunit RSC7 OS=Saccharomyces cerevisiae (strain ATCC 204508 / S288c) OX=559292 GN=NPL6 PE=1 SV=1	P32832	50	0	0	1.0964	0.8818	4.1966	5.1035	4.0379	7.001	5.3746	3.4622	7.1743	6.1216	0	0
1101	MIOREX complex component 12 OS=Saccharomyces cerevisiae (strain ATCC 204508 / S288c) OX=559292 GN=MRX12 PE=1 SV=2	P47084	60	11.823	0	4.3857	12.345	1.6786	0.85059	0.80758	2.8004	0	0	0	6.1216	3.7936	7.2146
1102	Regulatory protein SWI6 OS=Saccharomyces cerevisiae (strain ATCC 204508 / S288c) OX=559292 GN=SWI6 PE=1 SV=1	P09959	91	0	0	0	0.8818	1.6786	1.7012	3.2303	3.5005	12.899	10.386	10.761	6.1216	0	0
1103	Ribose-phosphate pyrophosphokinase 4 OS=Saccharomyces cerevisiae (strain ATCC 204508 / S288c) OX=559292 GN=PRS4 PE=1 SV=3	P38063	36	2.3646	0	0	0	5.8752	2.5518	11.306	4.9007	5.3746	0	1.7936	4.5912	3.7936	0
1104	Uncharacterized protein YFR016C OS=Saccharomyces cerevisiae (strain ATCC 204508 / S288c) OX=559292 GN=YFR016C PE=1 SV=1	P43597	138	0	0	0	0	5.0359	5.9541	14.536	9.8014	0	3.4622	0.89679	0	0	0
1105	Transcription initiation factor TFIID subunit 1 OS=Saccharomyces cerevisiae (strain ATCC 204508 / S288c) OX=559292 GN=TAF1 PE=1 SV=1	P46677	121	0	0	0	0	0	0	0	2.1003	18.274	10.386	12.555	0	0	0
1106	Transcriptional activator protein DAL81 OS=Saccharomyces cerevisiae (strain ATCC 204508 / S288c) OX=559292 GN=DAL81 PE=1 SV=3	P21657	109	0	0	0	0.8818	0	0	0	0	0	0	0	71.929	0	0
1107	Adenine deaminase OS=Saccharomyces cerevisiae (strain ATCC 204508 / S288c) OX=559292 GN=AAH1 PE=1 SV=1	P53909	40	2.3646	3.3461	4.3857	3.5272	3.3572	3.4024	4.8455	4.9007	7.5244	3.4622	1.7936	4.5912	2.5291	2.4049
1108	Cell wall protein ECM33 OS=Saccharomyces cerevisiae (strain ATCC 204508 / S288c) OX=559292 GN=ECM33 PE=1 SV=3	P38248	44	1.1823	3.3461	1.0964	2.6454	3.3572	2.5518	2.4227	2.8004	4.2997	6.0588	7.1743	0	2.5291	3.6073
1109	Ribosome assembly protein SQT1 OS=Saccharomyces cerevisiae (strain ATCC 204508 / S288c) OX=559292 GN=SQT1 PE=1 SV=2	P35184	47	7.0938	5.0191	3.2893	5.2908	2.5179	3.4024	2.4227	3.5005	2.1498	0	1.7936	4.5912	3.7936	4.8097
1110	U3 small nucleolar RNA-associated protein 8 OS=Saccharomyces cerevisiae (strain ATCC 204508 / S288c) OX=559292 GN=UTP8 PE=1 SV=1	P53276	80	3.5469	1.673	1.0964	6.1726	2.5179	3.4024	3.2303	2.8004	4.2997	6.0588	7.1743	0	1.2645	3.6073
1111	60S ribosomal protein L15-A OS=Saccharomyces cerevisiae (strain ATCC 204508 / S288c) OX=559292 GN=RPL15A PE=1 SV=3	P05748	24	0	1.673	7.675	3.5272	0.83931	0.85059	1.6152	1.4002	6.4495	6.9243	5.3807	1.5304	2.5291	7.2146
1112	Uncharacterized protein YMR315W OS=Saccharomyces cerevisiae (strain ATCC 204508 / S288c) OX=559292 GN=YMR315W PE=1 SV=1	Q04869	38	9.4584	3.3461	7.675	5.2908	0.83931	0	0.80758	0	1.0749	2.5966	0.89679	6.1216	6.3226	9.6194
1113	Trafficking protein particle complex II-specific subunit 120 OS=Saccharomyces cerevisiae (strain ATCC 204508 / S288c) OX=559292 GN=TRS120 PE=1 SV=1	Q04183	148	0	0	2.1929	4.409	3.3572	3.4024	4.8455	10.501	0	0.86554	2.6904	3.0608	5.0581	4.8097
1114	Conserved oligomeric Golgi complex subunit 1 OS=Saccharomyces cerevisiae (strain ATCC 204508 / S288c) OX=559292 GN=COG1 PE=1 SV=1	P53079	48	4.7292	0	0	5.2908	5.0359	5.1035	6.4607	4.2006	4.2997	2.5966	3.5871	6.1216	0	0
1115	Transcriptional regulatory protein DOT6 OS=Saccharomyces cerevisiae (strain ATCC 204508 / S288c) OX=559292 GN=DOT6 PE=1 SV=1	P40059	73	0	0	0	10.582	0.83931	0.85059	0	2.1003	2.1498	6.0588	4.4839	0	8.8517	10.822
1116	Kinesin-like protein CIN8 OS=Saccharomyces cerevisiae (strain ATCC 204508 / S288c) OX=559292 GN=CIN8 PE=1 SV=3	P27895	113	2.3646	1.673	6.5786	11.463	0	0	0	0	0	0.86554	0.89679	3.0608	17.703	14.429
1117	Rho-GTPase-activating protein RGD2 OS=Saccharomyces cerevisiae (strain ATCC 204508 / S288c) OX=559292 GN=RGD2 PE=1 SV=1	P43556	82	0	0	0	0.8818	2.5179	5.1035	1.6152	5.6008	15.049	6.0588	8.9679	0	0	0
1118	Cyclin-dependent protein kinase PHO85 OS=Saccharomyces cerevisiae (strain ATCC 204508 / S288c) OX=559292 GN=PHO85 PE=1 SV=2	P17157	35	5.9115	0	4.3857	0	5.8752	5.9541	4.8455	3.5005	0	0	0	4.5912	5.0581	2.4049
1119	Tyrosine-protein phosphatase 2 OS=Saccharomyces cerevisiae (strain ATCC 204508 / S288c) OX=559292 GN=PTP2 PE=1 SV=1	P29461	86	7.0938	3.3461	4.3857	9.6997	0	0	0	0	0	0	0	1.5304	5.0581	16.834
1120	Ubiquitin-activating enzyme E1-like OS=Saccharomyces cerevisiae (strain ATCC 204508 / S288c) OX=559292 GN=UBA2 PE=1 SV=1	P52488	71	0	0	3.2893	2.6454	7.5538	5.9541	8.8834	9.8014	0	0	0	0	0	0
1121	DNA-directed RNA polymerase I subunit RPA12 OS=Saccharomyces cerevisiae (strain ATCC 204508 / S288c) OX=559292 GN=RPA12 PE=1 SV=1	P32529	14	1.1823	1.673	2.1929	1.7636	0.83931	2.5518	4.8455	4.2006	6.4495	6.9243	5.3807	1.5304	5.0581	6.0121
1122	Protein DOM34 OS=Saccharomyces cerevisiae (strain ATCC 204508 / S288c) OX=559292 GN=DOM34 PE=1 SV=2	P33309	44	2.3646	0	2.1929	5.2908	0.83931	2.5518	5.6531	4.2006	8.5993	3.4622	1.7936	6.1216	1.2645	3.6073
1123	Autophagy-related protein 2 OS=Saccharomyces cerevisiae (strain ATCC 204508 / S288c) OX=559292 GN=ATG2 PE=1 SV=1	P53855	178	5.9115	0	3.2893	7.9362	2.5179	4.253	3.2303	7.001	3.2247	1.7311	1.7936	0	0	1.2024
1124	26S proteasome regulatory subunit RPN13 OS=Saccharomyces cerevisiae (strain ATCC 204508 / S288c) OX=559292 GN=RPN13 PE=1 SV=1	O13563	18	0	0	1.0964	0.8818	6.7145	9.3565	6.4607	2.1003	4.2997	6.9243	2.6904	1.5304	0	1.2024
1125	Serine/threonine-protein kinase YPK3 OS=Saccharomyces cerevisiae (strain ATCC 204508 / S288c) OX=559292 GN=YPK3 PE=1 SV=1	P38070	60	4.7292	6.6921	6.5786	4.409	0	0	0	0.7001	0	3.4622	3.5871	4.5912	7.5872	8.417
1126	Non-histone chromosomal protein 6A OS=Saccharomyces cerevisiae (strain ATCC 204508 / S288c) OX=559292 GN=NHP6A PE=1 SV=1	P11632	11	8.2761	6.6921	6.5786	4.409	0	0	0	0	0	0.86554	0.89679	9.1825	13.91	6.0121
1127	AP-1-like transcription factor YAP1 OS=Saccharomyces cerevisiae (strain ATCC 204508 / S288c) OX=559292 GN=YAP1 PE=1 SV=2	P19880	73	0	0	1.0964	1.7636	3.3572	6.8047	0	7.001	9.6742	7.7899	7.1743	0	0	0
1128	GTPase-activating protein BEM3 OS=Saccharomyces cerevisiae (strain ATCC 204508 / S288c) OX=559292 GN=BEM3 PE=1 SV=3	P32873	125	15.37	0	0	7.0544	4.1966	3.4024	0.80758	1.4002	0	0	0	13.774	0	1.2024
1129	Diphosphoinositol polyphosphate phosphohydrolase DDP1 OS=Saccharomyces cerevisiae (strain ATCC 204508 / S288c) OX=559292 GN=DDP1 PE=1 SV=3	Q99321	22	7.0938	8.3652	3.2893	2.6454	0	0	0	0	0	0	0	15.304	16.439	9.6194
1130	Alpha-1,3-mannosyltransferase MNN1 OS=Saccharomyces cerevisiae (strain ATCC 204508 / S288c) OX=559292 GN=MNN1 PE=1 SV=1	P39106	89	0	0	0	0	8.3931	1.7012	1.6152	11.202	0	5.1932	4.4839	0	0	0
1131	THO complex subunit THP2 OS=Saccharomyces cerevisiae (strain ATCC 204508 / S288c) OX=559292 GN=THP2 PE=1 SV=1	O13539	30	0	0	0	0	0	0.85059	6.4607	4.2006	10.749	9.5209	6.2775	0	0	0
1132	Transposon Ty2-GR2 Gag polyprotein OS=Saccharomyces cerevisiae (strain ATCC 204508 / S288c) OX=559292 GN=TY2A-GR2 PE=3 SV=1	P0CX62	50	7.0938	0	0	9.6997	1.6786	0	0	0	0	2.5966	3.5871	0	6.3226	0
1133	Kinetochore protein SLK19 OS=Saccharomyces cerevisiae (strain ATCC 204508 / S288c) OX=559292 GN=SLK19 PE=1 SV=1	Q08581	95	0	0	0	0	9.2324	5.1035	10.499	10.501	0	0	0	0	0	0
1134	DNA-directed RNA polymerases I, II, and III subunit RPABC5 OS=Saccharomyces cerevisiae (strain ATCC 204508 / S288c) OX=559292 GN=RPB10 PE=1 SV=2	P22139	8	0	0	2.1929	0	2.5179	5.1035	2.4227	2.8004	4.2997	4.3277	3.5871	3.0608	1.2645	0
1135	Ribonuclease 3 OS=Saccharomyces cerevisiae (strain ATCC 204508 / S288c) OX=559292 GN=RNT1 PE=1 SV=1	Q02555	54	3.5469	6.6921	4.3857	5.2908	0.83931	5.1035	3.2303	2.8004	0	0	0	4.5912	3.7936	6.0121
1136	Mediator of RNA polymerase II transcription subunit 15 OS=Saccharomyces cerevisiae (strain ATCC 204508 / S288c) OX=559292 GN=GAL11 PE=1 SV=3	P19659	120	3.5469	0	3.2893	18.518	0	0	0	1.4002	0	4.3277	6.2775	1.5304	3.7936	4.8097
1137	Regulator of Ty1 transposition protein 103 OS=Saccharomyces cerevisiae (strain ATCC 204508 / S288c) OX=559292 GN=RTT103 PE=1 SV=1	Q05543	46	0	0	1.0964	0.8818	4.1966	4.253	8.8834	4.2006	6.4495	5.1932	6.2775	0	0	0
1138	Bud emergence protein 1 OS=Saccharomyces cerevisiae (strain ATCC 204508 / S288c) OX=559292 GN=BEM1 PE=1 SV=1	P29366	62	11.823	8.3652	1.0964	10.582	0	0	0	0	0	0	0	6.1216	6.3226	13.227
1139	GTPase-activating protein GYP3 OS=Saccharomyces cerevisiae (strain ATCC 204508 / S288c) OX=559292 GN=MSB3 PE=1 SV=1	P48566	73	5.9115	0	12.061	6.1726	0	0	0	0	0	0	0	3.0608	10.116	8.417
1140	Translation initiation factor IF-2, mitochondrial OS=Saccharomyces cerevisiae (strain ATCC 204508 / S288c) OX=559292 GN=IFM1 PE=1 SV=2	P25038	76	7.0938	6.6921	7.675	6.1726	0	0	0	0	0	0	0	1.5304	11.381	10.822
1141	N-glycosylase/DNA lyase OS=Saccharomyces cerevisiae (strain ATCC 204508 / S288c) OX=559292 GN=OGG1 PE=1 SV=1	P53397	43	7.0938	5.0191	6.5786	7.0544	0	0	0	0	0	0	0	4.5912	8.8517	10.822
1142	Eukaryotic translation initiation factor 2A OS=Saccharomyces cerevisiae (strain ATCC 204508 / S288c) OX=559292 GN=YGR054W PE=1 SV=1	P53235	71	3.5469	11.711	8.7714	6.1726	0	0	0	0	0	0	0	6.1216	10.116	4.8097
1143	Golgi SNAP receptor complex member 1 OS=Saccharomyces cerevisiae (strain ATCC 204508 / S288c) OX=559292 GN=GOS1 PE=1 SV=1	P38736	25	0	0	0	0	3.3572	2.5518	2.4227	7.001	6.4495	11.252	8.0711	0	0	0
1144	Pre-rRNA-processing protein IPI3 OS=Saccharomyces cerevisiae (strain ATCC 204508 / S288c) OX=559292 GN=IPI3 PE=1 SV=1	P53877	62	0	0	0	0	0	0	1.6152	0	23.648	12.118	8.9679	0	0	0
1145	Regulatory protein LEU3 OS=Saccharomyces cerevisiae (strain ATCC 204508 / S288c) OX=559292 GN=LEU3 PE=1 SV=1	P08638	100	0	0	1.0964	3.5272	0	0	0	0	2.1498	0	0	56.625	0	0
1146	LAS seventeen-binding protein 5 OS=Saccharomyces cerevisiae (strain ATCC 204508 / S288c) OX=559292 GN=LSB5 PE=1 SV=3	P25369	40	1.1823	1.673	6.5786	0	2.5179	1.7012	1.6152	2.8004	9.6742	8.6554	8.0711	1.5304	1.2645	1.2024
1147	U3 small nucleolar RNA-associated protein 13 OS=Saccharomyces cerevisiae (strain ATCC 204508 / S288c) OX=559292 GN=UTP13 PE=1 SV=1	Q05946	91	1.1823	0	1.0964	4.409	3.3572	2.5518	7.2682	4.9007	5.3746	4.3277	1.7936	1.5304	0	1.2024
1148	ATP-dependent RNA helicase DOB1 OS=Saccharomyces cerevisiae (strain ATCC 204508 / S288c) OX=559292 GN=MTR4 PE=1 SV=1	P47047	122	2.3646	1.673	10.964	4.409	1.6786	0.85059	2.4227	4.2006	0	0	0	3.0608	5.0581	3.6073
1149	Diphthine--ammonia ligase OS=Saccharomyces cerevisiae (strain ATCC 204508 / S288c) OX=559292 GN=DPH6 PE=1 SV=1	Q12429	78	10.641	6.6921	4.3857	3.5272	2.5179	1.7012	0.80758	2.8004	0	0	0	1.5304	6.3226	7.2146
1150	Regulator of Ty1 transposition protein 10 OS=Saccharomyces cerevisiae (strain ATCC 204508 / S288c) OX=559292 GN=RTT10 PE=1 SV=1	Q08924	114	3.5469	1.673	8.7714	6.1726	4.1966	0.85059	4.0379	9.1013	0	0	0	0	1.2645	3.6073
1151	MAP kinase kinase kinase SSK2 OS=Saccharomyces cerevisiae (strain ATCC 204508 / S288c) OX=559292 GN=SSK2 PE=1 SV=1	P53599	181	1.1823	0	0	5.2908	3.3572	3.4024	3.2303	4.2006	6.4495	1.7311	1.7936	0	0	1.2024
1152	Rab proteins geranylgeranyltransferase component A OS=Saccharomyces cerevisiae (strain ATCC 204508 / S288c) OX=559292 GN=MRS6 PE=1 SV=2	P32864	67	1.1823	0	0	1.7636	5.0359	6.8047	9.691	7.001	3.2247	1.7311	1.7936	1.5304	0	0
1153	25S rRNA (adenine(645)-N(1))-methyltransferase OS=Saccharomyces cerevisiae (strain ATCC 204508 / S288c) OX=559292 GN=RRP8 PE=1 SV=2	P38961	46	4.7292	3.3461	5.4822	7.0544	0	0	0	0	0	0.86554	0.89679	10.713	12.645	13.227
1154	Fumarate reductase 1 OS=Saccharomyces cerevisiae (strain ATCC 204508 / S288c) OX=559292 GN=FRD1 PE=1 SV=1	P32614	51	8.2761	6.6921	15.35	6.1726	0	0	0	0.7001	0	0	0.89679	4.5912	3.7936	7.2146
1155	Transcriptional regulatory protein SDS3 OS=Saccharomyces cerevisiae (strain ATCC 204508 / S288c) OX=559292 GN=SDS3 PE=1 SV=1	P40505	38	0	0	0	0.8818	3.3572	3.4024	8.0758	6.3009	5.3746	6.9243	7.1743	0	0	0
1156	Ribosome assembly protein 4 OS=Saccharomyces cerevisiae (strain ATCC 204508 / S288c) OX=559292 GN=RSA4 PE=1 SV=3	P25382	57	4.7292	8.3652	9.8679	6.1726	0	0	0	0	0	0	0	4.5912	11.381	6.0121
1157	UBA domain-containing protein RUP1 OS=Saccharomyces cerevisiae (strain ATCC 204508 / S288c) OX=559292 GN=RUP1 PE=1 SV=1	Q12242	75	0	0	0	0	7.5538	8.5059	8.0758	7.001	3.2247	3.4622	1.7936	0	0	0
1158	Glucose N-acetyltransferase 1 OS=Saccharomyces cerevisiae (strain ATCC 204508 / S288c) OX=559292 GN=GNT1 PE=1 SV=1	Q12096	58	0	0	0	0	12.59	8.5059	2.4227	8.4012	0	4.3277	2.6904	0	0	0
1159	Uracil-DNA glycosylase OS=Saccharomyces cerevisiae (strain ATCC 204508 / S288c) OX=559292 GN=UNG1 PE=1 SV=1	P12887	40	8.2761	11.711	0	7.0544	0	0	0	0	0	0	0	6.1216	11.381	13.227
1160	GRASP65 homolog protein 1 OS=Saccharomyces cerevisiae (strain ATCC 204508 / S288c) OX=559292 GN=GRH1 PE=1 SV=1	Q04410	41	0	0	0	0	10.072	7.6553	6.4607	11.902	0	0	0	1.5304	0	0
1161	Cytoplasmic 60S subunit biogenesis factor REH1 OS=Saccharomyces cerevisiae (strain ATCC 204508 / S288c) OX=559292 GN=REH1 PE=1 SV=1	Q06709	50	0	0	0	0	0	0	0	0	11.824	15.58	13.452	0	1.2645	1.2024
1162	Protein ISD11 OS=Saccharomyces cerevisiae (strain ATCC 204508 / S288c) OX=559292 GN=ISD11 PE=1 SV=1	Q6Q560	11	4.7292	1.673	2.1929	4.409	3.3572	1.7012	5.6531	4.9007	0	1.7311	2.6904	1.5304	2.5291	2.4049
1163	37S ribosomal protein MRP4, mitochondrial OS=Saccharomyces cerevisiae (strain ATCC 204508 / S288c) OX=559292 GN=MRP4 PE=1 SV=1	P32902	44	10.641	5.0191	2.1929	7.0544	0.83931	0.85059	1.6152	0.7001	0	2.5966	2.6904	3.0608	7.5872	4.8097
1164	Structural maintenance of chromosomes protein 2 OS=Saccharomyces cerevisiae (strain ATCC 204508 / S288c) OX=559292 GN=SMC2 PE=1 SV=1	P38989	134	1.1823	0	4.3857	5.2908	3.3572	2.5518	6.4607	7.001	4.2997	1.7311	1.7936	0	0	1.2024
1165	GTP-binding protein YPT6 OS=Saccharomyces cerevisiae (strain ATCC 204508 / S288c) OX=559292 GN=YPT6 PE=1 SV=1	Q99260	24	5.9115	0	5.4822	2.6454	3.3572	1.7012	3.2303	5.6008	1.0749	1.7311	2.6904	0	3.7936	0
1166	Ribosome biogenesis protein BRX1 OS=Saccharomyces cerevisiae (strain ATCC 204508 / S288c) OX=559292 GN=BRX1 PE=1 SV=2	Q08235	34	0	0	0	0	0.83931	0	0.80758	0.7001	17.199	8.6554	9.8647	1.5304	2.5291	1.2024
1167	DNA repair protein RAD50 OS=Saccharomyces cerevisiae (strain ATCC 204508 / S288c) OX=559292 GN=RAD50 PE=1 SV=1	P12753	153	1.1823	0	2.1929	1.7636	4.1966	3.4024	6.4607	11.902	0	0.86554	0	0	0	0
1168	Importin beta-like protein KAP122 OS=Saccharomyces cerevisiae (strain ATCC 204508 / S288c) OX=559292 GN=KAP122 PE=1 SV=1	P32767	124	2.3646	0	1.0964	1.7636	5.8752	7.6553	8.8834	7.7011	0	0	0	6.1216	0	0
1169	DNA-directed RNA polymerase II subunit RPB9 OS=Saccharomyces cerevisiae (strain ATCC 204508 / S288c) OX=559292 GN=RPB9 PE=1 SV=1	P27999	14	0	0	0	0	4.1966	5.9541	6.4607	5.6008	5.3746	6.0588	6.2775	0	0	1.2024
1170	Nicotinamide/nicotinic acid mononucleotide adenylyltransferase 2 OS=Saccharomyces cerevisiae (strain ATCC 204508 / S288c) OX=559292 GN=NMA2 PE=1 SV=1	P53204	45	0	0	0	0	4.1966	5.1035	5.6531	4.2006	9.6742	7.7899	4.4839	0	0	1.2024
1171	1,3-beta-glucanosyltransferase GAS1 OS=Saccharomyces cerevisiae (strain ATCC 204508 / S288c) OX=559292 GN=GAS1 PE=1 SV=2	P22146	60	0	0	0	0	6.7145	5.9541	6.4607	5.6008	1.0749	3.4622	5.3807	0	0	0
1172	Guanylate kinase OS=Saccharomyces cerevisiae (strain ATCC 204508 / S288c) OX=559292 GN=GUK1 PE=1 SV=2	P15454	21	7.0938	8.3652	10.964	11.463	0	0	0	0	0	0	0	3.0608	7.5872	2.4049
1173	60S ribosomal protein L37-A OS=Saccharomyces cerevisiae (strain ATCC 204508 / S288c) OX=559292 GN=RPL37A PE=1 SV=2	P49166	10	0	1.673	0	0	0	0.85059	0	0	19.348	8.6554	8.0711	0	0	0
1174	Centromere-binding protein 1 OS=Saccharomyces cerevisiae (strain ATCC 204508 / S288c) OX=559292 GN=CBF1 PE=1 SV=2	P17106	39	0	0	0	0	9.2324	8.5059	10.499	9.8014	0	0	0	0	0	0
1175	Probable electron transfer flavoprotein subunit alpha, mitochondrial OS=Saccharomyces cerevisiae (strain ATCC 204508 / S288c) OX=559292 GN=AIM45 PE=1 SV=1	Q12480	37	9.4584	10.038	5.4822	7.0544	1.6786	1.7012	0.80758	0.7001	1.0749	0.86554	1.7936	4.5912	3.7936	3.6073
1176	Protein BIM1 OS=Saccharomyces cerevisiae (strain ATCC 204508 / S288c) OX=559292 GN=BIM1 PE=1 SV=1	P40013	38	3.5469	5.0191	1.0964	4.409	1.6786	2.5518	2.4227	2.1003	1.0749	0.86554	0.89679	6.1216	10.116	6.0121
1177	60S ribosomal protein L38 OS=Saccharomyces cerevisiae (strain ATCC 204508 / S288c) OX=559292 GN=RPL38 PE=1 SV=1	P49167	9	2.3646	3.3461	3.2893	2.6454	0	0	0.80758	0.7001	4.2997	6.9243	8.9679	1.5304	6.3226	3.6073
1178	Vacuolar protein sorting-associated protein 35 OS=Saccharomyces cerevisiae (strain ATCC 204508 / S288c) OX=559292 GN=VPS35 PE=1 SV=2	P34110	109	0	0	0	5.2908	2.5179	2.5518	3.2303	4.2006	4.2997	1.7311	0.89679	4.5912	0	6.0121
1179	Mitochondrial acidic protein MAM33 OS=Saccharomyces cerevisiae (strain ATCC 204508 / S288c) OX=559292 GN=MAM33 PE=1 SV=1	P40513	30	1.1823	0	3.2893	3.5272	4.1966	5.1035	4.0379	4.9007	4.2997	5.1932	4.4839	0	0	1.2024
1180	Bud site selection protein 3 OS=Saccharomyces cerevisiae (strain ATCC 204508 / S288c) OX=559292 GN=BUD3 PE=1 SV=2	P25558	185	0	0	0	7.9362	1.6786	1.7012	0.80758	2.8004	1.0749	6.0588	7.1743	1.5304	12.645	0
1181	Protein ZEO1 OS=Saccharomyces cerevisiae (strain ATCC 204508 / S288c) OX=559292 GN=ZEO1 PE=1 SV=3	Q08245	13	4.7292	3.3461	8.7714	4.409	0.83931	0	0	0.7001	0	0	0.89679	6.1216	11.381	9.6194
1182	Broad-range acid phosphatase DET1 OS=Saccharomyces cerevisiae (strain ATCC 204508 / S288c) OX=559292 GN=DET1 PE=1 SV=1	Q99288	39	0	0	3.2893	2.6454	7.5538	6.8047	8.8834	7.7011	0	0	0.89679	0	1.2645	0
1183	Protein LDB19 OS=Saccharomyces cerevisiae (strain ATCC 204508 / S288c) OX=559292 GN=LDB19 PE=1 SV=1	Q12502	90	15.37	20.076	0	2.6454	0	0	0.80758	0	0	0	0	7.652	7.5872	6.0121
1184	GRIP domain-containing protein RUD3 OS=Saccharomyces cerevisiae (strain ATCC 204508 / S288c) OX=559292 GN=RUD3 PE=1 SV=1	Q12234	56	0	0	0	0	1.6786	5.1035	9.691	6.3009	3.2247	4.3277	8.9679	0	0	0
1185	H/ACA ribonucleoprotein complex subunit NHP2 OS=Saccharomyces cerevisiae (strain ATCC 204508 / S288c) OX=559292 GN=NHP2 PE=1 SV=2	P32495	17	0	0	0	2.6454	0	1.7012	0.80758	0	12.899	13.849	10.761	0	0	2.4049
1186	Vacuolar protein sorting-associated protein 4 OS=Saccharomyces cerevisiae (strain ATCC 204508 / S288c) OX=559292 GN=VPS4 PE=1 SV=1	P52917	48	0	0	10.964	0.8818	6.7145	7.6553	6.4607	7.001	0	0	0	1.5304	0	0
1187	Ribosomal lysine N-methyltransferase 1 OS=Saccharomyces cerevisiae (strain ATCC 204508 / S288c) OX=559292 GN=RKM1 PE=1 SV=1	Q08961	67	0	0	0	0	5.8752	9.3565	9.691	8.4012	0	0	0.89679	0	0	1.2024
1188	Protein PCF11 OS=Saccharomyces cerevisiae (strain ATCC 204508 / S288c) OX=559292 GN=PCF11 PE=1 SV=2	P39081	72	0	0	1.0964	6.1726	5.8752	5.1035	8.8834	5.6008	0	0	0	0	0	0
1189	Uncharacterized protein YMR196W OS=Saccharomyces cerevisiae (strain ATCC 204508 / S288c) OX=559292 GN=YMR196W PE=1 SV=1	Q04336	127	0	0	0	0	4.1966	5.1035	12.921	11.202	0	0	0	0	0	0
1190	Pre-mRNA-splicing factor 8 OS=Saccharomyces cerevisiae (strain ATCC 204508 / S288c) OX=559292 GN=PRP8 PE=1 SV=1	P33334	280	0	0	1.0964	0	0	1.7012	0	0	12.899	13.849	11.658	0	0	0
1191	Uncharacterized ATP-dependent helicase IRC5 OS=Saccharomyces cerevisiae (strain ATCC 204508 / S288c) OX=559292 GN=IRC5 PE=1 SV=2	P43610	97	3.5469	0	8.7714	11.463	1.6786	1.7012	2.4227	1.4002	1.0749	1.7311	0	0	1.2645	2.4049
1192	40S ribosomal protein S28-A OS=Saccharomyces cerevisiae (strain ATCC 204508 / S288c) OX=559292 GN=RPS28A PE=1 SV=1	Q3E7X9	8	3.5469	5.0191	2.1929	1.7636	0	0	0.80758	0.7001	3.2247	6.9243	10.761	6.1216	3.7936	3.6073
1193	Ribosome assembly protein 3 OS=Saccharomyces cerevisiae (strain ATCC 204508 / S288c) OX=559292 GN=RSA3 PE=1 SV=1	Q05942	25	1.1823	1.673	0	0.8818	2.5179	1.7012	2.4227	2.1003	7.5244	8.6554	9.8647	0	1.2645	1.2024
1194	Sterol-4-alpha-carboxylate 3-dehydrogenase, decarboxylating OS=Saccharomyces cerevisiae (strain ATCC 204508 / S288c) OX=559292 GN=ERG26 PE=1 SV=1	P53199	39	4.7292	0	2.1929	7.9362	2.5179	2.5518	4.8455	4.9007	0	2.5966	4.4839	0	1.2645	4.8097
1195	Exosome complex exonuclease RRP6 OS=Saccharomyces cerevisiae (strain ATCC 204508 / S288c) OX=559292 GN=RRP6 PE=1 SV=1	Q12149	84	0	0	2.1929	5.2908	4.1966	5.1035	9.691	3.5005	0	0.86554	0.89679	0	2.5291	3.6073
1196	Hexokinase-1 OS=Saccharomyces cerevisiae (strain ATCC 204508 / S288c) OX=559292 GN=HXK1 PE=1 SV=2	P04806	54	0	0	7.675	3.5272	0	0	0.80758	6.3009	0	0.86554	0.89679	6.1216	15.174	4.8097
1197	Protein transport protein SEC9 OS=Saccharomyces cerevisiae (strain ATCC 204508 / S288c) OX=559292 GN=SEC9 PE=1 SV=1	P40357	74	2.3646	0	2.1929	0	5.0359	6.8047	0.80758	4.9007	1.0749	7.7899	9.8647	0	0	0
1198	Ubiquitin carboxyl-terminal hydrolase 12 OS=Saccharomyces cerevisiae (strain ATCC 204508 / S288c) OX=559292 GN=UBP12 PE=1 SV=1	P39538	143	0	0	0	0	4.1966	4.253	7.2682	9.8014	2.1498	2.5966	3.5871	0	0	1.2024
1199	Initiation-specific alpha-1,6-mannosyltransferase OS=Saccharomyces cerevisiae (strain ATCC 204508 / S288c) OX=559292 GN=OCH1 PE=1 SV=1	P31755	55	1.1823	0	0	0	6.7145	6.8047	3.2303	4.2006	4.2997	4.3277	7.1743	0	0	0
1200	Protein AIR2 OS=Saccharomyces cerevisiae (strain ATCC 204508 / S288c) OX=559292 GN=AIR2 PE=1 SV=1	Q12476	39	0	0	1.0964	0	0	0	1.6152	0.7001	9.6742	12.983	9.8647	0	2.5291	3.6073
1201	Sister chromatid cohesion protein PDS5 OS=Saccharomyces cerevisiae (strain ATCC 204508 / S288c) OX=559292 GN=PDS5 PE=1 SV=1	Q04264	147	0	0	0	0.8818	11.75	7.6553	4.8455	7.7011	1.0749	0.86554	0	0	0	1.2024
1202	Vacuolar protein 8 OS=Saccharomyces cerevisiae (strain ATCC 204508 / S288c) OX=559292 GN=VAC8 PE=1 SV=3	P39968	63	0	0	0	0.8818	7.5538	5.1035	8.0758	7.001	0	4.3277	3.5871	0	0	0
1203	Protein FMP52, mitochondrial OS=Saccharomyces cerevisiae (strain ATCC 204508 / S288c) OX=559292 GN=FMP52 PE=1 SV=1	P40008	25	8.2761	10.038	4.3857	5.2908	0	0	0	0	0	0	0	4.5912	7.5872	6.0121
1204	Inhibitory regulator protein BUD2/CLA2 OS=Saccharomyces cerevisiae (strain ATCC 204508 / S288c) OX=559292 GN=BUD2 PE=1 SV=2	P33314	127	2.3646	1.673	3.2893	4.409	0	0	0	0	0	0	0	9.1825	13.91	9.6194
1205	UBX domain-containing protein 5 OS=Saccharomyces cerevisiae (strain ATCC 204508 / S288c) OX=559292 GN=UBX5 PE=1 SV=1	Q06682	57	0	0	0	0	5.0359	5.9541	6.4607	4.9007	3.2247	6.9243	6.2775	0	0	0
1206	RNA polymerase II subunit A C-terminal domain phosphatase OS=Saccharomyces cerevisiae (strain ATCC 204508 / S288c) OX=559292 GN=FCP1 PE=1 SV=1	Q03254	83	0	0	0	0	9.2324	7.6553	8.8834	6.3009	4.2997	0.86554	2.6904	0	0	0
1207	Glucan 1,3-beta-glucosidase I/II OS=Saccharomyces cerevisiae (strain ATCC 204508 / S288c) OX=559292 GN=EXG1 PE=1 SV=1	P23776	51	0	0	0	0.8818	10.072	6.8047	10.499	9.1013	0	0	0	0	0	0
1208	Serine/threonine-protein kinase DBF20 OS=Saccharomyces cerevisiae (strain ATCC 204508 / S288c) OX=559292 GN=DBF20 PE=1 SV=2	P32328	66	5.9115	10.038	6.5786	6.1726	0	0	0	0	0	0	0	0	3.7936	0
1209	DnaJ homolog 1, mitochondrial OS=Saccharomyces cerevisiae (strain ATCC 204508 / S288c) OX=559292 GN=MDJ1 PE=1 SV=1	P35191	56	1.1823	1.673	1.0964	4.409	0.83931	1.7012	0.80758	1.4002	2.1498	10.386	7.1743	1.5304	2.5291	4.8097
1210	Protein ROD1 OS=Saccharomyces cerevisiae (strain ATCC 204508 / S288c) OX=559292 GN=ROD1 PE=1 SV=1	Q02805	92	5.9115	0	2.1929	18.518	0.83931	1.7012	2.4227	2.1003	1.0749	2.5966	0.89679	1.5304	0	1.2024
1211	GTP-binding protein RHO1 OS=Saccharomyces cerevisiae (strain ATCC 204508 / S288c) OX=559292 GN=RHO1 PE=1 SV=3	P06780	23	0	0	1.0964	0.8818	5.8752	5.9541	5.6531	5.6008	3.2247	1.7311	3.5871	1.5304	2.5291	2.4049
1212	Protein HOS4 OS=Saccharomyces cerevisiae (strain ATCC 204508 / S288c) OX=559292 GN=HOS4 PE=1 SV=1	P40480	124	4.7292	0	1.0964	7.9362	0.83931	0.85059	0	0.7001	4.2997	9.5209	6.2775	0	0	0
1213	Protein BNI4 OS=Saccharomyces cerevisiae (strain ATCC 204508 / S288c) OX=559292 GN=BNI4 PE=1 SV=1	P53858	101	5.9115	0	0	7.0544	2.5179	3.4024	1.6152	4.9007	4.2997	5.1932	3.5871	0	0	0
1214	S-methyl-5'-thioadenosine phosphorylase OS=Saccharomyces cerevisiae (strain ATCC 204508 / S288c) OX=559292 GN=MEU1 PE=1 SV=1	Q07938	38	5.9115	5.0191	13.157	6.1726	3.3572	0	0	0.7001	0	0	0	4.5912	5.0581	1.2024
1215	Late secretory pathway protein AVL9 OS=Saccharomyces cerevisiae (strain ATCC 204508 / S288c) OX=559292 GN=AVL9 PE=1 SV=1	Q12500	86	0	0	0	0	5.8752	5.1035	4.8455	5.6008	2.1498	4.3277	4.4839	0	0	1.2024
1216	Bud site selection protein 27 OS=Saccharomyces cerevisiae (strain ATCC 204508 / S288c) OX=559292 GN=BUD27 PE=1 SV=1	P43573	91	0	0	0	0.8818	5.0359	6.8047	2.4227	7.7011	5.3746	4.3277	3.5871	0	0	0
1217	Nucleoporin NUP84 OS=Saccharomyces cerevisiae (strain ATCC 204508 / S288c) OX=559292 GN=NUP84 PE=1 SV=1	P52891	84	0	0	0	1.7636	5.0359	6.8047	7.2682	7.001	2.1498	2.5966	5.3807	0	0	0
1218	Protein PAM1 OS=Saccharomyces cerevisiae (strain ATCC 204508 / S288c) OX=559292 GN=PAM1 PE=1 SV=2	P37304	93	5.9115	8.3652	0	8.818	0	0	0.80758	0.7001	0	0	0	4.5912	7.5872	10.822
1219	Protein translocation protein SEC63 OS=Saccharomyces cerevisiae (strain ATCC 204508 / S288c) OX=559292 GN=SEC63 PE=1 SV=2	P14906	75	0	0	1.0964	0	1.6786	0.85059	1.6152	2.8004	0	12.118	13.452	0	0	0
1220	TATA-box-binding protein OS=Saccharomyces cerevisiae (strain ATCC 204508 / S288c) OX=559292 GN=SPT15 PE=1 SV=3	P13393	27	8.2761	10.038	6.5786	4.409	0	0	0	0	0	0	0	6.1216	12.645	6.0121
1221	DNA repair and recombination protein RDH54 OS=Saccharomyces cerevisiae (strain ATCC 204508 / S288c) OX=559292 GN=RDH54 PE=1 SV=4	P38086	108	0	1.673	8.7714	3.5272	0	0	0	0	0	0	0	3.0608	21.497	10.822
1222	Glucan 1,3-beta-glucosidase OS=Saccharomyces cerevisiae (strain ATCC 204508 / S288c) OX=559292 GN=BGL2 PE=1 SV=1	P15703	34	2.3646	5.0191	3.2893	1.7636	2.5179	0.85059	4.0379	3.5005	0	1.7311	3.5871	6.1216	5.0581	6.0121
1223	Cytosolic Fe-S cluster assembly factor NBP35 OS=Saccharomyces cerevisiae (strain ATCC 204508 / S288c) OX=559292 GN=NBP35 PE=1 SV=1	P52920	35	5.9115	3.3461	3.2893	3.5272	3.3572	1.7012	0.80758	2.1003	0	1.7311	0.89679	6.1216	2.5291	3.6073
1224	Topoisomerase 1-associated factor 1 OS=Saccharomyces cerevisiae (strain ATCC 204508 / S288c) OX=559292 GN=TOF1 PE=1 SV=1	P53840	141	2.3646	0	2.1929	5.2908	1.6786	3.4024	4.0379	2.1003	1.0749	2.5966	2.6904	0	0	6.0121
1225	Trafficking protein particle complex subunit 31 OS=Saccharomyces cerevisiae (strain ATCC 204508 / S288c) OX=559292 GN=TRS31 PE=1 SV=1	Q03337	32	0	0	0	0	3.3572	4.253	3.2303	5.6008	1.0749	4.3277	5.3807	6.1216	1.2645	7.2146
1226	Elongator complex protein 4 OS=Saccharomyces cerevisiae (strain ATCC 204508 / S288c) OX=559292 GN=ELP4 PE=1 SV=1	Q02884	51	1.1823	0	3.2893	4.409	3.3572	4.253	1.6152	1.4002	1.0749	8.6554	7.1743	0	0	0
1227	Protein MLF3 OS=Saccharomyces cerevisiae (strain ATCC 204508 / S288c) OX=559292 GN=MLF3 PE=1 SV=2	P32047	49	3.5469	1.673	0	14.991	1.6786	3.4024	0	5.6008	0	1.7311	2.6904	1.5304	0	3.6073
1228	Cell division control protein 25 OS=Saccharomyces cerevisiae (strain ATCC 204508 / S288c) OX=559292 GN=CDC25 PE=1 SV=1	P04821	179	0	0	2.1929	0.8818	5.8752	5.9541	1.6152	7.7011	2.1498	5.1932	2.6904	0	0	0
1229	Serine/threonine-protein kinase RIM15 OS=Saccharomyces cerevisiae (strain ATCC 204508 / S288c) OX=559292 GN=RIM15 PE=1 SV=1	P43565	197	8.2761	0	1.0964	18.518	1.6786	3.4024	1.6152	4.2006	0	0	0.89679	0	0	0
1230	GTPase-activating protein GYP5 OS=Saccharomyces cerevisiae (strain ATCC 204508 / S288c) OX=559292 GN=GYP5 PE=1 SV=1	Q12344	102	0	0	0	0.8818	5.8752	4.253	8.0758	9.8014	0	0.86554	0.89679	0	0	0
1231	Membrane protein PTM1 OS=Saccharomyces cerevisiae (strain ATCC 204508 / S288c) OX=559292 GN=PTM1 PE=1 SV=2	P32857	60	0	0	0	0	4.1966	4.253	3.2303	5.6008	2.1498	7.7899	8.9679	0	0	0
1232	DNA-directed RNA polymerases I, II, and III subunit RPABC3 OS=Saccharomyces cerevisiae (strain ATCC 204508 / S288c) OX=559292 GN=RPB8 PE=1 SV=1	P20436	17	1.1823	1.673	2.1929	1.7636	5.0359	3.4024	4.8455	4.2006	3.2247	2.5966	2.6904	0	2.5291	3.6073
1233	60S ribosomal protein L1-A OS=Saccharomyces cerevisiae (strain ATCC 204508 / S288c) OX=559292 GN=RPL1A PE=1 SV=1	P0CX43	24	1.1823	1.673	1.0964	5.2908	2.5179	2.5518	1.6152	3.5005	4.2997	5.1932	6.2775	0	1.2645	1.2024
1234	Transcription initiation factor TFIID subunit 14 OS=Saccharomyces cerevisiae (strain ATCC 204508 / S288c) OX=559292 GN=TAF14 PE=1 SV=1	P35189	27	1.1823	1.673	1.0964	1.7636	5.0359	4.253	3.2303	3.5005	6.4495	4.3277	2.6904	0	1.2645	0
1235	Signal recognition particle subunit SRP14 OS=Saccharomyces cerevisiae (strain ATCC 204508 / S288c) OX=559292 GN=SRP14 PE=1 SV=1	P38985	16	1.1823	3.3461	3.2893	5.2908	0	0	0.80758	0	1.0749	10.386	7.1743	3.0608	3.7936	6.0121
1236	NifU-like protein, mitochondrial OS=Saccharomyces cerevisiae (strain ATCC 204508 / S288c) OX=559292 GN=NFU1 PE=1 SV=2	P32860	29	3.5469	0	1.0964	2.6454	4.1966	4.253	7.2682	7.001	0	0.86554	0.89679	3.0608	0	0
1237	Aspartokinase OS=Saccharomyces cerevisiae (strain ATCC 204508 / S288c) OX=559292 GN=HOM3 PE=1 SV=2	P10869	58	8.2761	3.3461	7.675	6.1726	5.0359	0.85059	3.2303	2.1003	0	0	0	0	1.2645	3.6073
1238	UPF0303 protein YBR137W OS=Saccharomyces cerevisiae (strain ATCC 204508 / S288c) OX=559292 GN=YBR137W PE=1 SV=4	P38276	20	1.1823	1.673	0	0	5.0359	4.253	4.0379	2.8004	5.3746	5.1932	3.5871	0	0	0
1239	Actin-like protein ARP9 OS=Saccharomyces cerevisiae (strain ATCC 204508 / S288c) OX=559292 GN=ARP9 PE=1 SV=1	Q05123	53	0	0	1.0964	0	2.5179	2.5518	4.0379	2.1003	4.2997	6.0588	8.0711	3.0608	0	0
1240	Ribosomal RNA-processing protein 9 OS=Saccharomyces cerevisiae (strain ATCC 204508 / S288c) OX=559292 GN=RRP9 PE=1 SV=1	Q06506	65	1.1823	0	0	1.7636	3.3572	3.4024	4.0379	3.5005	5.3746	6.0588	7.1743	0	0	0
1241	Transcriptional regulatory protein UME1 OS=Saccharomyces cerevisiae (strain ATCC 204508 / S288c) OX=559292 GN=UME1 PE=1 SV=1	Q03010	51	0	0	0	1.7636	2.5179	2.5518	8.8834	4.9007	4.2997	3.4622	4.4839	0	0	0
1242	Uncharacterized protein YLR179C OS=Saccharomyces cerevisiae (strain ATCC 204508 / S288c) OX=559292 GN=YLR179C PE=1 SV=1	Q06252	22	3.5469	6.6921	7.675	9.6997	0	0	0	0.7001	0	0	0	4.5912	5.0581	6.0121
1243	Transcription factor SKN7 OS=Saccharomyces cerevisiae (strain ATCC 204508 / S288c) OX=559292 GN=SKN7 PE=1 SV=1	P38889	69	0	0	0	3.5272	0.83931	0.85059	0	0.7001	0	0.86554	0.89679	50.503	0	0
1244	TATA-binding protein-associated factor MOT1 OS=Saccharomyces cerevisiae (strain ATCC 204508 / S288c) OX=559292 GN=MOT1 PE=1 SV=1	P32333	210	2.3646	6.6921	3.2893	1.7636	0	0	0	0	0	0	0	7.652	15.174	10.822
1245	2-isopropylmalate synthase 2, mitochondrial OS=Saccharomyces cerevisiae (strain ATCC 204508 / S288c) OX=559292 GN=LEU9 PE=1 SV=1	Q12166	67	2.3646	0	4.3857	3.5272	3.3572	1.7012	4.8455	5.6008	0	0	0.89679	0	0	0
1246	Low-affinity glucose transporter HXT3 OS=Saccharomyces cerevisiae (strain ATCC 204508 / S288c) OX=559292 GN=HXT3 PE=1 SV=1	P32466	63	0	0	0	0	5.8752	5.1035	5.6531	4.9007	1.0749	6.9243	6.2775	0	0	0
1247	Cytochrome c iso-2 OS=Saccharomyces cerevisiae (strain ATCC 204508 / S288c) OX=559292 GN=CYC7 PE=1 SV=1	P00045	13	2.3646	6.6921	4.3857	4.409	0	0	0	0	0	0	0	9.1825	12.645	8.417
1248	Uncharacterized protein YMR295C OS=Saccharomyces cerevisiae (strain ATCC 204508 / S288c) OX=559292 GN=YMR295C PE=1 SV=1	Q03559	22	0	0	0	0	3.3572	2.5518	0.80758	3.5005	5.3746	11.252	11.658	0	0	0
1249	NADPH--cytochrome P450 reductase OS=Saccharomyces cerevisiae (strain ATCC 204508 / S288c) OX=559292 GN=NCP1 PE=1 SV=3	P16603	77	0	0	0	0	5.0359	5.9541	6.4607	7.001	0	3.4622	7.1743	0	0	0
1250	[PSI+] inducibility protein 3 OS=Saccharomyces cerevisiae (strain ATCC 204508 / S288c) OX=559292 GN=PIN3 PE=1 SV=1	Q06449	24	0	0	0	0.8818	2.5179	2.5518	0	4.2006	0	12.118	14.349	0	0	0
1251	Serine/threonine-protein phosphatase 4 regulatory subunit 3 OS=Saccharomyces cerevisiae (strain ATCC 204508 / S288c) OX=559292 GN=PSY2 PE=1 SV=1	P40164	98	0	0	0	0	6.7145	8.5059	8.8834	8.4012	0	0.86554	0.89679	0	0	0
1252	Serine/threonine-protein kinase PKH3 OS=Saccharomyces cerevisiae (strain ATCC 204508 / S288c) OX=559292 GN=PKH3 PE=1 SV=1	Q03306	100	3.5469	0	0	10.582	0	0	0	0	0	0	0	3.0608	13.91	12.024
1253	Ubiquitin carboxyl-terminal hydrolase 10 OS=Saccharomyces cerevisiae (strain ATCC 204508 / S288c) OX=559292 GN=UBP10 PE=1 SV=2	P53874	89	0	0	0	0	0	0	0.80758	0	11.824	14.714	8.9679	0	0	0
1254	Vacuolar-sorting protein SNF7 OS=Saccharomyces cerevisiae (strain ATCC 204508 / S288c) OX=559292 GN=SNF7 PE=1 SV=1	P39929	27	0	0	2.1929	1.7636	3.3572	4.253	2.4227	4.9007	4.2997	6.0588	3.5871	1.5304	1.2645	1.2024
1255	60S acidic ribosomal protein P2-alpha OS=Saccharomyces cerevisiae (strain ATCC 204508 / S288c) OX=559292 GN=RPP2A PE=1 SV=1	P05319	11	2.3646	1.673	3.2893	2.6454	0.83931	0.85059	2.4227	0.7001	9.6742	6.9243	8.0711	0	0	2.4049
1256	Copper transport protein 86 OS=Saccharomyces cerevisiae (strain ATCC 204508 / S288c) OX=559292 GN=CTR86 PE=1 SV=1	P25355	65	7.0938	1.673	4.3857	0.8818	3.3572	3.4024	2.4227	3.5005	0	0.86554	0	3.0608	0	1.2024
1257	Pre-rRNA-processing protein ESF2 OS=Saccharomyces cerevisiae (strain ATCC 204508 / S288c) OX=559292 GN=ESF2 PE=1 SV=1	P53743	36	3.5469	1.673	3.2893	1.7636	0.83931	3.4024	4.8455	2.1003	8.5993	4.3277	0	0	0	1.2024
1258	GrpE protein homolog, mitochondrial OS=Saccharomyces cerevisiae (strain ATCC 204508 / S288c) OX=559292 GN=MGE1 PE=1 SV=1	P38523	26	1.1823	0	0	0.8818	8.3931	6.8047	5.6531	5.6008	1.0749	0	0.89679	1.5304	0	1.2024
1259	Rab GDP-dissociation inhibitor OS=Saccharomyces cerevisiae (strain ATCC 204508 / S288c) OX=559292 GN=GDI1 PE=1 SV=1	P39958	51	3.5469	3.3461	9.8679	5.2908	4.1966	1.7012	2.4227	6.3009	0	0	0	0	2.5291	1.2024
1260	Serine/threonine-protein kinase AKL1 OS=Saccharomyces cerevisiae (strain ATCC 204508 / S288c) OX=559292 GN=AKL1 PE=1 SV=1	P38080	124	4.7292	1.673	0	3.5272	3.3572	5.9541	0	3.5005	0	5.1932	1.7936	0	0	3.6073
1261	Mitochondrial translation optimization protein 1 OS=Saccharomyces cerevisiae (strain ATCC 204508 / S288c) OX=559292 GN=MTO1 PE=1 SV=2	P53070	74	9.4584	1.673	6.5786	14.109	0.83931	0.85059	0	0	0	0	0	0	3.7936	3.6073
1262	HDA1 complex subunit 2 OS=Saccharomyces cerevisiae (strain ATCC 204508 / S288c) OX=559292 GN=HDA2 PE=1 SV=1	Q06629	77	0	0	1.0964	2.6454	5.0359	7.6553	6.4607	7.7011	0	1.7311	0	0	0	0
1263	Carboxypeptidase Y-deficient protein 8 OS=Saccharomyces cerevisiae (strain ATCC 204508 / S288c) OX=559292 GN=PEP8 PE=1 SV=2	P40335	43	1.1823	0	1.0964	5.2908	1.6786	1.7012	3.2303	5.6008	2.1498	1.7311	1.7936	3.0608	7.5872	6.0121
1264	Pre-mRNA-splicing factor RSE1 OS=Saccharomyces cerevisiae (strain ATCC 204508 / S288c) OX=559292 GN=RSE1 PE=1 SV=1	Q04693	154	1.1823	0	1.0964	0.8818	2.5179	4.253	6.4607	5.6008	5.3746	1.7311	2.6904	1.5304	1.2645	1.2024
1265	U6 snRNA-associated Sm-like protein LSm2 OS=Saccharomyces cerevisiae (strain ATCC 204508 / S288c) OX=559292 GN=LSM2 PE=1 SV=1	P38203	11	2.3646	0	2.1929	4.409	3.3572	3.4024	3.2303	2.1003	0	0.86554	0	3.0608	2.5291	2.4049
1266	RNA end formation protein 2 OS=Saccharomyces cerevisiae (strain ATCC 204508 / S288c) OX=559292 GN=REF2 PE=1 SV=2	P42073	60	3.5469	3.3461	3.2893	4.409	0	2.5518	1.6152	0.7001	0	4.3277	2.6904	0	10.116	4.8097
1267	DNA replication licensing factor MCM7 OS=Saccharomyces cerevisiae (strain ATCC 204508 / S288c) OX=559292 GN=MCM7 PE=1 SV=4	P38132	95	2.3646	0	6.5786	1.7636	2.5179	4.253	3.2303	4.2006	1.0749	1.7311	3.5871	9.1825	0	0
1268	cAMP-dependent protein kinase regulatory subunit OS=Saccharomyces cerevisiae (strain ATCC 204508 / S288c) OX=559292 GN=BCY1 PE=1 SV=4	P07278	47	8.2761	0	4.3857	7.9362	3.3572	0	0	5.6008	0	0.86554	0.89679	1.5304	2.5291	1.2024
1269	Endoplasmic reticulum vesicle protein 25 OS=Saccharomyces cerevisiae (strain ATCC 204508 / S288c) OX=559292 GN=ERV25 PE=1 SV=1	P54837	24	1.1823	1.673	0	0	3.3572	1.7012	0.80758	2.8004	7.5244	7.7899	8.0711	0	0	0
1270	Actin-related protein 2/3 complex subunit 5 OS=Saccharomyces cerevisiae (strain ATCC 204508 / S288c) OX=559292 GN=ARC15 PE=1 SV=1	P40518	17	1.1823	0	5.4822	1.7636	4.1966	5.9541	5.6531	6.3009	0	0	0.89679	0	0	0
1271	Farnesyl pyrophosphate synthase OS=Saccharomyces cerevisiae (strain ATCC 204508 / S288c) OX=559292 GN=ERG20 PE=1 SV=2	P08524	40	7.0938	10.038	6.5786	5.2908	0	0	0	1.4002	0	0	0	6.1216	7.5872	7.2146
1272	Shuttling pre-60S factor ECM1 OS=Saccharomyces cerevisiae (strain ATCC 204508 / S288c) OX=559292 GN=ECM1 PE=1 SV=2	P39715	24	3.5469	3.3461	4.3857	2.6454	0	0	0	0	0	0	0	6.1216	13.91	7.2146
1273	Pre-mRNA-splicing factor SLT11 OS=Saccharomyces cerevisiae (strain ATCC 204508 / S288c) OX=559292 GN=ECM2 PE=1 SV=1	P38241	41	3.5469	0	10.964	7.9362	0	0	0	0	0	0	0	6.1216	7.5872	6.0121
1274	Pyruvate kinase 2 OS=Saccharomyces cerevisiae (strain ATCC 204508 / S288c) OX=559292 GN=PYK2 PE=1 SV=1	P52489	55	3.5469	3.3461	4.3857	3.5272	1.6786	0	0	0	0	2.5966	0	0	2.5291	2.4049
1275	Heat shock protein 70 homolog LHS1 OS=Saccharomyces cerevisiae (strain ATCC 204508 / S288c) OX=559292 GN=LHS1 PE=1 SV=1	P36016	100	0	0	0	0	8.3931	5.1035	9.691	6.3009	0	0	0	0	0	0
1276	40S ribosomal protein S27-B OS=Saccharomyces cerevisiae (strain ATCC 204508 / S288c) OX=559292 GN=RPS27B PE=1 SV=1	P38711	9	2.3646	1.673	0	1.7636	0.83931	1.7012	1.6152	2.1003	1.0749	4.3277	2.6904	3.0608	3.7936	2.4049
1277	Monothiol glutaredoxin-4 OS=Saccharomyces cerevisiae (strain ATCC 204508 / S288c) OX=559292 GN=GRX4 PE=1 SV=1	P32642	27	0	1.673	1.0964	0.8818	2.5179	2.5518	3.2303	2.1003	7.5244	3.4622	6.2775	3.0608	1.2645	1.2024
1278	N-alpha-acetyltransferase 30 OS=Saccharomyces cerevisiae (strain ATCC 204508 / S288c) OX=559292 GN=MAK3 PE=1 SV=1	Q03503	20	7.0938	3.3461	4.3857	5.2908	1.6786	0	0.80758	0.7001	0	0.86554	0.89679	6.1216	7.5872	8.417
1279	RING-box protein HRT1 OS=Saccharomyces cerevisiae (strain ATCC 204508 / S288c) OX=559292 GN=HRT1 PE=1 SV=1	Q08273	14	1.1823	0	1.0964	3.5272	4.1966	4.253	4.0379	4.2006	4.2997	3.4622	3.5871	0	0	2.4049
1280	Vacuolar protein sorting-associated protein 21 OS=Saccharomyces cerevisiae (strain ATCC 204508 / S288c) OX=559292 GN=VPS21 PE=1 SV=1	P36017	23	2.3646	0	9.8679	1.7636	1.6786	1.7012	3.2303	5.6008	1.0749	4.3277	4.4839	0	0	1.2024
1281	Serine/threonine-protein kinase STE7 OS=Saccharomyces cerevisiae (strain ATCC 204508 / S288c) OX=559292 GN=STE7 PE=1 SV=1	P06784	58	3.5469	1.673	4.3857	7.0544	0.83931	0.85059	0	0	0	0.86554	0.89679	3.0608	8.8517	8.417
1282	DNA-binding protein REB1 OS=Saccharomyces cerevisiae (strain ATCC 204508 / S288c) OX=559292 GN=REB1 PE=1 SV=2	P21538	92	0	0	3.2893	0.8818	5.0359	6.8047	3.2303	8.4012	0	1.7311	2.6904	1.5304	0	0
1283	Bud site selection protein 4 OS=Saccharomyces cerevisiae (strain ATCC 204508 / S288c) OX=559292 GN=BUD4 PE=1 SV=2	P47136	164	0	0	0	0	0	2.5518	1.6152	5.6008	5.3746	5.1932	3.5871	0	8.8517	0
1284	54S ribosomal protein YmL6, mitochondrial OS=Saccharomyces cerevisiae (strain ATCC 204508 / S288c) OX=559292 GN=YML6 PE=1 SV=1	P51998	32	7.0938	5.0191	3.2893	7.0544	0	0	0	0	0	0.86554	0	10.713	6.3226	4.8097
1285	Serine/threonine-protein kinase PKH1 OS=Saccharomyces cerevisiae (strain ATCC 204508 / S288c) OX=559292 GN=PKH1 PE=1 SV=1	Q03407	86	4.7292	6.6921	5.4822	6.1726	0	0	0	0	0	0	0	3.0608	6.3226	8.417
1286	Protein DSF2 OS=Saccharomyces cerevisiae (strain ATCC 204508 / S288c) OX=559292 GN=DSF2 PE=1 SV=2	P38213	82	2.3646	0	2.1929	7.9362	0	0	0	0	0	0	0	3.0608	10.116	12.024
1287	Casein kinase II subunit beta' OS=Saccharomyces cerevisiae (strain ATCC 204508 / S288c) OX=559292 GN=CKB2 PE=1 SV=1	P38930	30	0	0	0	0	3.3572	2.5518	4.0379	2.8004	7.5244	6.9243	5.3807	0	0	0
1288	54S ribosomal protein L3, mitochondrial OS=Saccharomyces cerevisiae (strain ATCC 204508 / S288c) OX=559292 GN=MRPL3 PE=1 SV=2	P36516	44	4.7292	5.0191	8.7714	7.0544	0	0	0	0	0	0	0	6.1216	7.5872	6.0121
1289	Uncharacterized protein YKR078W OS=Saccharomyces cerevisiae (strain ATCC 204508 / S288c) OX=559292 GN=YKR078W PE=1 SV=1	P36158	68	16.552	0	2.1929	10.582	0	0.85059	0	0	0	0	0	1.5304	3.7936	9.6194
1290	Cell division control protein 1 OS=Saccharomyces cerevisiae (strain ATCC 204508 / S288c) OX=559292 GN=CDC1 PE=1 SV=2	P40986	57	0	0	0	0	5.0359	2.5518	0	4.2006	4.2997	8.6554	9.8647	0	0	0
1291	26S proteasome regulatory subunit RPN14 OS=Saccharomyces cerevisiae (strain ATCC 204508 / S288c) OX=559292 GN=RPN14 PE=1 SV=1	P53196	46	0	0	0	0	7.5538	5.9541	8.0758	7.001	2.1498	0	1.7936	0	0	0
1292	Kynureninase OS=Saccharomyces cerevisiae (strain ATCC 204508 / S288c) OX=559292 GN=BNA5 PE=1 SV=1	Q05979	51	0	0	0	0	8.3931	6.8047	8.0758	7.001	0	0	0	0	0	0
1293	Thiamine metabolism regulatory protein THI3 OS=Saccharomyces cerevisiae (strain ATCC 204508 / S288c) OX=559292 GN=THI3 PE=1 SV=1	Q07471	68	3.5469	1.673	0	3.5272	4.1966	0	0	0	0	0	0	0	0	0
1294	NADH-cytochrome b5 reductase 1 OS=Saccharomyces cerevisiae (strain ATCC 204508 / S288c) OX=559292 GN=CBR1 PE=1 SV=2	P38626	31	1.1823	1.673	4.3857	1.7636	1.6786	0	4.8455	2.8004	1.0749	2.5966	3.5871	4.5912	7.5872	2.4049
1295	Nuclear and cytoplasmic polyadenylated RNA-binding protein PUB1 OS=Saccharomyces cerevisiae (strain ATCC 204508 / S288c) OX=559292 GN=PUB1 PE=1 SV=4	P32588	51	2.3646	3.3461	3.2893	3.5272	2.5179	0.85059	2.4227	2.1003	0	2.5966	2.6904	6.1216	1.2645	0
1296	Mediator of RNA polymerase II transcription subunit 17 OS=Saccharomyces cerevisiae (strain ATCC 204508 / S288c) OX=559292 GN=SRB4 PE=1 SV=1	P32569	78	1.1823	0	1.0964	2.6454	2.5179	4.253	2.4227	3.5005	3.2247	3.4622	2.6904	3.0608	0	0
1297	Bud site selection protein 14 OS=Saccharomyces cerevisiae (strain ATCC 204508 / S288c) OX=559292 GN=BUD14 PE=1 SV=4	P27637	79	1.1823	1.673	0	1.7636	3.3572	2.5518	1.6152	4.2006	2.1498	6.9243	6.2775	0	0	0
1298	Pre-mRNA-splicing factor PRP9 OS=Saccharomyces cerevisiae (strain ATCC 204508 / S288c) OX=559292 GN=PRP9 PE=1 SV=1	P19736	63	1.1823	0	5.4822	3.5272	1.6786	2.5518	0	0	0	0.86554	0.89679	0	13.91	8.417
1299	Cytochrome c peroxidase, mitochondrial OS=Saccharomyces cerevisiae (strain ATCC 204508 / S288c) OX=559292 GN=CCP1 PE=1 SV=2	P00431	40	0	0	2.1929	2.6454	3.3572	4.253	4.8455	6.3009	0	3.4622	4.4839	0	1.2645	1.2024
1300	Carboxypeptidase Y OS=Saccharomyces cerevisiae (strain ATCC 204508 / S288c) OX=559292 GN=PRC1 PE=1 SV=1	P00729	60	2.3646	0	2.1929	3.5272	3.3572	5.1035	6.4607	6.3009	0	0	0	1.5304	1.2645	4.8097
1301	Cap-associated protein CAF20 OS=Saccharomyces cerevisiae (strain ATCC 204508 / S288c) OX=559292 GN=CAF20 PE=1 SV=2	P12962	18	0	0	3.2893	0	8.3931	8.5059	3.2303	4.9007	0	0.86554	0.89679	0	0	2.4049
1302	Nucleoporin NUP82 OS=Saccharomyces cerevisiae (strain ATCC 204508 / S288c) OX=559292 GN=NUP82 PE=1 SV=2	P40368	82	2.3646	1.673	0	3.5272	1.6786	4.253	6.4607	8.4012	0	0	1.7936	0	0	0
1303	eIF-2-alpha kinase GCN2 OS=Saccharomyces cerevisiae (strain ATCC 204508 / S288c) OX=559292 GN=GCN2 PE=1 SV=3	P15442	190	0	0	0	0	0.83931	0	0.80758	0.7001	10.749	8.6554	8.9679	0	0	1.2024
1304	Uncharacterized WD repeat-containing protein YNL035C OS=Saccharomyces cerevisiae (strain ATCC 204508 / S288c) OX=559292 GN=YNL035C PE=1 SV=1	P53962	44	0	0	1.0964	0.8818	2.5179	6.8047	11.306	8.4012	0	0	0	0	0	1.2024
1305	DNA repair and recombination protein RAD26 OS=Saccharomyces cerevisiae (strain ATCC 204508 / S288c) OX=559292 GN=RAD26 PE=1 SV=1	P40352	125	2.3646	1.673	5.4822	7.0544	0	0	0	0	0	0	0	1.5304	3.7936	10.822
1306	Protein BOB1 OS=Saccharomyces cerevisiae (strain ATCC 204508 / S288c) OX=559292 GN=BOI1 PE=1 SV=1	P38041	109	2.3646	0	0	1.7636	0	0	0	0	0	0.86554	1.7936	3.0608	12.645	16.834
1307	Ribosomal RNA small subunit methyltransferase NEP1 OS=Saccharomyces cerevisiae (strain ATCC 204508 / S288c) OX=559292 GN=EMG1 PE=1 SV=1	Q06287	28	9.4584	6.6921	8.7714	5.2908	0	0	0	0	0	0	0	3.0608	6.3226	6.0121
1308	DNA-binding protein RAP1 OS=Saccharomyces cerevisiae (strain ATCC 204508 / S288c) OX=559292 GN=RAP1 PE=1 SV=2	P11938	92	0	0	1.0964	0.8818	6.7145	8.5059	4.8455	9.1013	0	0	0	0	0	0
1309	Methylthioribose-1-phosphate isomerase OS=Saccharomyces cerevisiae (strain ATCC 204508 / S288c) OX=559292 GN=MRI1 PE=1 SV=1	Q06489	45	0	0	2.1929	0.8818	10.072	2.5518	6.4607	6.3009	0	0	0	0	0	0
1310	Protein MSO1 OS=Saccharomyces cerevisiae (strain ATCC 204508 / S288c) OX=559292 GN=MSO1 PE=1 SV=1	P53604	23	5.9115	5.0191	0	3.5272	0	0	0	0	0	0	0	1.5304	15.174	13.227
1311	Peroxisomal acyl-coenzyme A thioester hydrolase 1 OS=Saccharomyces cerevisiae (strain ATCC 204508 / S288c) OX=559292 GN=TES1 PE=1 SV=1	P41903	40	1.1823	0	5.4822	2.6454	0	0	0	0	0	0	0	6.1216	11.381	12.024
1312	Golgi apyrase OS=Saccharomyces cerevisiae (strain ATCC 204508 / S288c) OX=559292 GN=YND1 PE=1 SV=1	P40009	72	0	0	0	0	7.5538	5.1035	0	9.8014	0	2.5966	3.5871	0	0	0
1313	Cysteine--tRNA ligase OS=Saccharomyces cerevisiae (strain ATCC 204508 / S288c) OX=559292 GN=YNL247W PE=1 SV=1	P53852	88	3.5469	3.3461	15.35	9.6997	0	0	0	4.9007	0	0	0	0	0	0
1314	Serine/threonine-protein phosphatase 2B catalytic subunit A1 OS=Saccharomyces cerevisiae (strain ATCC 204508 / S288c) OX=559292 GN=CNA1 PE=1 SV=2	P23287	63	0	0	0	0	5.8752	5.1035	8.0758	9.8014	0	0	0	0	0	0
1315	Nuclear transport factor 2 OS=Saccharomyces cerevisiae (strain ATCC 204508 / S288c) OX=559292 GN=NTF2 PE=1 SV=2	P33331	14	2.3646	1.673	5.4822	2.6454	1.6786	0.85059	3.2303	2.8004	3.2247	2.5966	4.4839	3.0608	2.5291	2.4049
1316	Small nuclear ribonucleoprotein Sm D1 OS=Saccharomyces cerevisiae (strain ATCC 204508 / S288c) OX=559292 GN=SMD1 PE=1 SV=1	Q02260	16	2.3646	8.3652	0	2.6454	0	0	0	0.7001	4.2997	1.7311	2.6904	4.5912	3.7936	3.6073
1317	Ribosome biogenesis protein TSR3 OS=Saccharomyces cerevisiae (strain ATCC 204508 / S288c) OX=559292 GN=TSR3 PE=1 SV=1	Q12094	36	3.5469	5.0191	1.0964	1.7636	0.83931	0.85059	1.6152	0.7001	6.4495	6.9243	8.0711	1.5304	0	0
1318	60S ribosomal protein L43-B OS=Saccharomyces cerevisiae (strain ATCC 204508 / S288c) OX=559292 GN=RPL43B PE=1 SV=1	P0CX26	10	1.1823	3.3461	2.1929	2.6454	0	0	0.80758	0	8.5993	7.7899	4.4839	1.5304	3.7936	3.6073
1319	Diphosphomevalonate decarboxylase OS=Saccharomyces cerevisiae (strain ATCC 204508 / S288c) OX=559292 GN=MVD1 PE=1 SV=2	P32377	44	4.7292	1.673	8.7714	5.2908	0.83931	0	0	4.9007	0	0	0.89679	1.5304	3.7936	3.6073
1320	CBK1 kinase activator protein MOB2 OS=Saccharomyces cerevisiae (strain ATCC 204508 / S288c) OX=559292 GN=MOB2 PE=1 SV=2	P43563	33	8.2761	6.6921	2.1929	4.409	0.83931	0.85059	0	0	1.0749	0	0	1.5304	10.116	9.6194
1321	Peroxisomal membrane protein import receptor PEX19 OS=Saccharomyces cerevisiae (strain ATCC 204508 / S288c) OX=559292 GN=PEX19 PE=1 SV=2	Q07418	39	0	0	1.0964	0	5.8752	5.1035	4.8455	4.2006	1.0749	2.5966	2.6904	1.5304	0	0
1322	Glucose-induced degradation protein 8 OS=Saccharomyces cerevisiae (strain ATCC 204508 / S288c) OX=559292 GN=GID8 PE=1 SV=1	P40208	52	0	0	0	0.8818	2.5179	3.4024	4.8455	4.2006	3.2247	7.7899	4.4839	0	0	1.2024
1323	Pre-mRNA-splicing factor PRP21 OS=Saccharomyces cerevisiae (strain ATCC 204508 / S288c) OX=559292 GN=PRP21 PE=1 SV=1	P32524	33	2.3646	6.6921	4.3857	4.409	0	0.85059	0	0	0	0	0	7.652	10.116	6.0121
1324	Protein DOS2 OS=Saccharomyces cerevisiae (strain ATCC 204508 / S288c) OX=559292 GN=DOS2 PE=1 SV=1	P54858	36	0	0	0	0.8818	4.1966	2.5518	1.6152	1.4002	9.6742	6.9243	7.1743	0	0	0
1325	Protein SOF1 OS=Saccharomyces cerevisiae (strain ATCC 204508 / S288c) OX=559292 GN=SOF1 PE=1 SV=1	P33750	57	3.5469	1.673	7.675	6.1726	0	0	0	0	0	0.86554	0	7.652	8.8517	7.2146
1326	Ras GTPase-activating-like protein IQG1 OS=Saccharomyces cerevisiae (strain ATCC 204508 / S288c) OX=559292 GN=IQG1 PE=1 SV=1	Q12280	173	2.3646	0	4.3857	11.463	0	0	0	0	0	0.86554	0.89679	0	5.0581	8.417
1327	Exosome complex component RRP43 OS=Saccharomyces cerevisiae (strain ATCC 204508 / S288c) OX=559292 GN=RRP43 PE=1 SV=2	P25359	44	0	0	0	0	5.0359	5.1035	8.0758	5.6008	0	3.4622	1.7936	0	1.2645	0
1328	Vacuolar protein sorting-associated protein 75 OS=Saccharomyces cerevisiae (strain ATCC 204508 / S288c) OX=559292 GN=VPS75 PE=1 SV=1	P53853	31	0	0	0	0	5.0359	3.4024	4.8455	3.5005	7.5244	4.3277	4.4839	0	0	0
1329	rRNA biogenesis protein RRP36 OS=Saccharomyces cerevisiae (strain ATCC 204508 / S288c) OX=559292 GN=RRP36 PE=1 SV=1	Q12481	36	2.3646	0	2.1929	0	0	0	0.80758	0	7.5244	12.983	8.0711	0	1.2645	0
1330	Imidazoleglycerol-phosphate dehydratase OS=Saccharomyces cerevisiae (strain ATCC 204508 / S288c) OX=559292 GN=HIS3 PE=1 SV=2	P06633	24	1.1823	1.673	0	0	9.2324	6.8047	2.4227	2.1003	0	0	0	0	0	1.2024
1331	Probable phospholipid-transporting ATPase DRS2 OS=Saccharomyces cerevisiae (strain ATCC 204508 / S288c) OX=559292 GN=DRS2 PE=1 SV=2	P39524	154	0	0	0	0	5.0359	4.253	1.6152	3.5005	0	5.1932	10.761	0	0	0
1332	High-osmolarity-induced transcription protein 1 OS=Saccharomyces cerevisiae (strain ATCC 204508 / S288c) OX=559292 GN=HOT1 PE=1 SV=1	Q03213	79	0	0	0	0	1.6786	1.7012	0	2.1003	9.6742	8.6554	8.0711	0	0	0
1333	Ribosome biogenesis protein UTP30 OS=Saccharomyces cerevisiae (strain ATCC 204508 / S288c) OX=559292 GN=UTP30 PE=1 SV=1	P36144	32	7.0938	0	2.1929	3.5272	0	0	0	0	0	0	0	7.652	10.116	7.2146
1334	5-aminolevulinate synthase, mitochondrial OS=Saccharomyces cerevisiae (strain ATCC 204508 / S288c) OX=559292 GN=HEM1 PE=1 SV=1	P09950	59	7.0938	0	9.8679	3.5272	0	0	0	0	0	0	0	4.5912	7.5872	7.2146
1335	Ubiquitin fusion degradation protein 1 OS=Saccharomyces cerevisiae (strain ATCC 204508 / S288c) OX=559292 GN=UFD1 PE=1 SV=1	P53044	40	0	0	0	0	7.5538	6.8047	5.6531	7.001	0	0.86554	0	0	0	1.2024
1336	Myosin-3 OS=Saccharomyces cerevisiae (strain ATCC 204508 / S288c) OX=559292 GN=MYO3 PE=1 SV=4	P36006	142	0	0	0	0	1.6786	0	0	3.5005	0	12.118	10.761	0	0	0
1337	Replication factor A protein 2 OS=Saccharomyces cerevisiae (strain ATCC 204508 / S288c) OX=559292 GN=RFA2 PE=1 SV=1	P26754	30	2.3646	1.673	3.2893	1.7636	3.3572	3.4024	4.0379	2.8004	1.0749	0	2.6904	4.5912	1.2645	2.4049
1338	Regulator of ribosome biosynthesis OS=Saccharomyces cerevisiae (strain ATCC 204508 / S288c) OX=559292 GN=RRS1 PE=1 SV=1	Q08746	23	1.1823	3.3461	2.1929	3.5272	0.83931	1.7012	1.6152	0.7001	10.749	0	0.89679	4.5912	6.3226	4.8097
1339	Protein FYV8 OS=Saccharomyces cerevisiae (strain ATCC 204508 / S288c) OX=559292 GN=FYV8 PE=1 SV=1	P46949	91	0	0	2.1929	2.6454	1.6786	1.7012	0.80758	3.5005	8.5993	4.3277	3.5871	0	1.2645	0
1340	Mediator of RNA polymerase II transcription subunit 20 OS=Saccharomyces cerevisiae (strain ATCC 204508 / S288c) OX=559292 GN=SRB2 PE=1 SV=1	P34162	23	2.3646	0	5.4822	6.1726	0.83931	0	4.0379	4.9007	0	1.7311	1.7936	1.5304	1.2645	3.6073
1341	Multisite-specific tRNA:(cytosine-C(5))-methyltransferase OS=Saccharomyces cerevisiae (strain ATCC 204508 / S288c) OX=559292 GN=NCL1 PE=1 SV=1	P38205	78	7.0938	3.3461	6.5786	5.2908	0.83931	0	1.6152	0.7001	0	1.7311	1.7936	0	6.3226	2.4049
1342	Transcription initiation factor TFIID subunit 9 OS=Saccharomyces cerevisiae (strain ATCC 204508 / S288c) OX=559292 GN=TAF9 PE=1 SV=1	Q05027	17	2.3646	1.673	0	2.6454	0.83931	0	3.2303	2.1003	3.2247	5.1932	8.0711	4.5912	0	1.2024
1343	Protein HRI1 OS=Saccharomyces cerevisiae (strain ATCC 204508 / S288c) OX=559292 GN=HRI1 PE=1 SV=1	Q05905	28	4.7292	3.3461	8.7714	3.5272	0	0	0.80758	0.7001	0	0	0.89679	3.0608	6.3226	4.8097
1344	U3 small nucleolar RNA-associated protein 15 OS=Saccharomyces cerevisiae (strain ATCC 204508 / S288c) OX=559292 GN=UTP15 PE=1 SV=1	Q04305	58	0	0	4.3857	1.7636	0	0	2.4227	1.4002	6.4495	8.6554	5.3807	0	3.7936	1.2024
1345	Protein MPE1 OS=Saccharomyces cerevisiae (strain ATCC 204508 / S288c) OX=559292 GN=MPE1 PE=1 SV=1	P35728	50	0	0	0	1.7636	1.6786	1.7012	4.0379	2.1003	6.4495	5.1932	8.0711	0	0	0
1346	Nicotinate-nucleotide pyrophosphorylase [carboxylating] OS=Saccharomyces cerevisiae (strain ATCC 204508 / S288c) OX=559292 GN=BNA6 PE=1 SV=1	P43619	32	0	1.673	2.1929	0	6.7145	3.4024	8.0758	6.3009	0	0	0	0	1.2645	1.2024
1347	Actin-like protein ARP8 OS=Saccharomyces cerevisiae (strain ATCC 204508 / S288c) OX=559292 GN=ARP8 PE=1 SV=1	Q12386	100	0	0	0	0	0.83931	1.7012	4.0379	6.3009	7.5244	6.9243	3.5871	0	0	0
1348	Nucleoporin NUP170 OS=Saccharomyces cerevisiae (strain ATCC 204508 / S288c) OX=559292 GN=NUP170 PE=1 SV=1	P38181	169	5.9115	0	0	17.636	0	0	0	2.1003	0	2.5966	2.6904	0	0	2.4049
1349	DNA-directed RNA polymerase, mitochondrial OS=Saccharomyces cerevisiae (strain ATCC 204508 / S288c) OX=559292 GN=RPO41 PE=3 SV=2	P13433	153	4.7292	1.673	10.964	14.109	0	0	0	0	0	0	0	0	1.2645	0
1350	Uncharacterized protein YMR074C OS=Saccharomyces cerevisiae (strain ATCC 204508 / S288c) OX=559292 GN=YMR074C PE=1 SV=1	Q04773	16	0	0	0	0	5.8752	8.5059	4.0379	4.2006	0	0	0	0	0	0
1351	Protein MRH1 OS=Saccharomyces cerevisiae (strain ATCC 204508 / S288c) OX=559292 GN=MRH1 PE=1 SV=1	Q12117	36	1.1823	3.3461	2.1929	1.7636	1.6786	0.85059	2.4227	2.1003	3.2247	5.1932	3.5871	1.5304	2.5291	2.4049
1352	Acid phosphatase PHO12 OS=Saccharomyces cerevisiae (strain ATCC 204508 / S288c) OX=559292 GN=PHO12 PE=1 SV=1	P38693	53	3.5469	3.3461	5.4822	3.5272	3.3572	0	1.6152	2.8004	0	1.7311	0.89679	4.5912	2.5291	2.4049
1353	Cell division control protein 7 OS=Saccharomyces cerevisiae (strain ATCC 204508 / S288c) OX=559292 GN=CDC7 PE=1 SV=2	P06243	58	3.5469	0	2.1929	10.582	1.6786	0.85059	2.4227	2.8004	2.1498	0	0	1.5304	1.2645	3.6073
1354	1-phosphatidylinositol 3-phosphate 5-kinase FAB1 OS=Saccharomyces cerevisiae (strain ATCC 204508 / S288c) OX=559292 GN=FAB1 PE=1 SV=3	P34756	257	0	0	2.1929	7.9362	0.83931	0.85059	0	3.5005	2.1498	1.7311	2.6904	0	1.2645	4.8097
1355	Activator of stress genes 1 OS=Saccharomyces cerevisiae (strain ATCC 204508 / S288c) OX=559292 GN=ASG1 PE=1 SV=1	P40467	109	1.1823	1.673	2.1929	8.818	0.83931	0.85059	4.0379	2.1003	0	0.86554	0.89679	9.1825	0	0
1356	WD repeat-containing protein YMR102C OS=Saccharomyces cerevisiae (strain ATCC 204508 / S288c) OX=559292 GN=YMR102C PE=1 SV=1	Q03177	94	4.7292	0	12.061	3.5272	0.83931	0.85059	0	1.4002	1.0749	0.86554	0	0	3.7936	4.8097
1357	Protein NBA1 OS=Saccharomyces cerevisiae (strain ATCC 204508 / S288c) OX=559292 GN=NBA1 PE=1 SV=1	Q08229	56	0	1.673	1.0964	3.5272	2.5179	6.8047	0.80758	3.5005	0	2.5966	6.2775	0	1.2645	0
1358	Zinc finger protein MSN2 OS=Saccharomyces cerevisiae (strain ATCC 204508 / S288c) OX=559292 GN=MSN2 PE=1 SV=1	P33748	78	0	8.3652	0	2.6454	0	0	0	0.7001	1.0749	3.4622	0.89679	6.1216	7.5872	7.2146
1359	Aromatic amino acid aminotransferase 2 OS=Saccharomyces cerevisiae (strain ATCC 204508 / S288c) OX=559292 GN=ARO9 PE=1 SV=3	P38840	59	1.1823	0	5.4822	5.2908	0.83931	0	0.80758	7.001	0	0	0	0	3.7936	3.6073
1360	Pre-mRNA polyadenylation factor FIP1 OS=Saccharomyces cerevisiae (strain ATCC 204508 / S288c) OX=559292 GN=FIP1 PE=1 SV=1	P45976	36	1.1823	0	0	0	2.5179	3.4024	3.2303	2.8004	6.4495	6.0588	6.2775	0	0	1.2024
1361	DNA polymerase alpha subunit B OS=Saccharomyces cerevisiae (strain ATCC 204508 / S288c) OX=559292 GN=POL12 PE=1 SV=1	P38121	79	0	0	0	2.6454	1.6786	3.4024	2.4227	4.2006	9.6742	3.4622	5.3807	0	0	0
1362	ARS-binding factor 2, mitochondrial OS=Saccharomyces cerevisiae (strain ATCC 204508 / S288c) OX=559292 GN=ABF2 PE=1 SV=1	Q02486	22	2.3646	1.673	0	2.6454	0	0	0	0	0	3.4622	0.89679	19.895	7.5872	7.2146
1363	Probable mannosyltransferase KTR3 OS=Saccharomyces cerevisiae (strain ATCC 204508 / S288c) OX=559292 GN=KTR3 PE=1 SV=1	P38130	47	0	0	0	0	3.3572	2.5518	1.6152	2.8004	2.1498	5.1932	10.761	0	0	1.2024
1364	U3 small nucleolar RNA-associated protein 22 OS=Saccharomyces cerevisiae (strain ATCC 204508 / S288c) OX=559292 GN=UTP22 PE=1 SV=1	P53254	140	0	0	16.446	1.7636	0	2.5518	0	0	0	1.7311	4.4839	0	0	1.2024
1365	DNA repair/transcription protein MET18/MMS19 OS=Saccharomyces cerevisiae (strain ATCC 204508 / S288c) OX=559292 GN=MET18 PE=1 SV=1	P40469	118	0	0	0	0.8818	9.2324	8.5059	6.4607	3.5005	0	0	0	0	0	0
1366	HMG2-induced ER-remodeling protein 1 OS=Saccharomyces cerevisiae (strain ATCC 204508 / S288c) OX=559292 GN=HER1 PE=1 SV=1	Q12276	139	3.5469	0	4.3857	16.754	0	0	0	0	0	0	0	1.5304	6.3226	2.4049
1367	Putative endoplasmic reticulum mannosidase MNL2 OS=Saccharomyces cerevisiae (strain ATCC 204508 / S288c) OX=559292 GN=MNL2 PE=1 SV=1	Q12205	97	0	0	0	0	5.0359	6.8047	0	8.4012	0	5.1932	5.3807	0	0	0
1368	Protein AIR1 OS=Saccharomyces cerevisiae (strain ATCC 204508 / S288c) OX=559292 GN=AIR1 PE=1 SV=1	P40507	42	0	0	1.0964	0	0	0	0.80758	0	9.6742	14.714	7.1743	0	0	0
1369	Alpha-1,2-mannosyltransferase MNN5 OS=Saccharomyces cerevisiae (strain ATCC 204508 / S288c) OX=559292 GN=MNN5 PE=1 SV=2	P46982	67	0	0	0	0	7.5538	0.85059	4.8455	12.602	0	0	0.89679	0	0	0
1370	Probable glutamine amidotransferase DUG3 OS=Saccharomyces cerevisiae (strain ATCC 204508 / S288c) OX=559292 GN=DUG3 PE=1 SV=1	P53871	40	0	0	0	0	7.5538	7.6553	4.0379	6.3009	0	0	0	0	0	0
1371	H/ACA ribonucleoprotein complex non-core subunit NAF1 OS=Saccharomyces cerevisiae (strain ATCC 204508 / S288c) OX=559292 GN=NAF1 PE=1 SV=1	P53919	55	1.1823	0	1.0964	4.409	0.83931	2.5518	0.80758	1.4002	5.3746	4.3277	4.4839	3.0608	2.5291	1.2024
1372	Transcription elongation factor SPT4 OS=Saccharomyces cerevisiae (strain ATCC 204508 / S288c) OX=559292 GN=SPT4 PE=1 SV=1	P32914	11	1.1823	1.673	6.5786	0.8818	2.5179	3.4024	1.6152	2.1003	4.2997	3.4622	4.4839	1.5304	0	1.2024
1373	tRNA (guanine(26)-N(2))-dimethyltransferase, mitochondrial OS=Saccharomyces cerevisiae (strain ATCC 204508 / S288c) OX=559292 GN=TRM1 PE=1 SV=1	P15565	64	4.7292	0	0	4.409	0.83931	0.85059	0.80758	2.1003	0	1.7311	6.2775	3.0608	3.7936	7.2146
1374	Putative uncharacterized oxidoreductase YGL039W OS=Saccharomyces cerevisiae (strain ATCC 204508 / S288c) OX=559292 GN=YGL039W PE=1 SV=1	P53183	38	14.188	3.3461	2.1929	6.1726	0	0.85059	0	0.7001	0	0	1.7936	1.5304	1.2645	3.6073
1375	Protein GIR2 OS=Saccharomyces cerevisiae (strain ATCC 204508 / S288c) OX=559292 GN=GIR2 PE=1 SV=1	Q03768	31	0	0	0	0.8818	2.5179	3.4024	7.2682	5.6008	5.3746	0.86554	1.7936	3.0608	0	1.2024
1376	Ribosome biogenesis protein RLP7 OS=Saccharomyces cerevisiae (strain ATCC 204508 / S288c) OX=559292 GN=RLP7 PE=1 SV=1	P40693	37	2.3646	0	4.3857	7.0544	0	0	0.80758	0	2.1498	2.5966	0.89679	4.5912	6.3226	4.8097
1377	Tubulin gamma chain OS=Saccharomyces cerevisiae (strain ATCC 204508 / S288c) OX=559292 GN=TUB4 PE=1 SV=1	P53378	53	5.9115	0	0	5.2908	1.6786	2.5518	3.2303	3.5005	0	2.5966	3.5871	1.5304	0	0
1378	Inner kinetochore subunit CTF19 OS=Saccharomyces cerevisiae (strain ATCC 204508 / S288c) OX=559292 GN=CTF19 PE=1 SV=1	Q02732	43	7.0938	6.6921	9.8679	3.5272	0	0	1.6152	1.4002	0	0	0	3.0608	3.7936	4.8097
1379	Protein arginine N-methyltransferase HSL7 OS=Saccharomyces cerevisiae (strain ATCC 204508 / S288c) OX=559292 GN=HSL7 PE=1 SV=1	P38274	95	0	0	2.1929	0	2.5179	3.4024	5.6531	7.001	2.1498	2.5966	1.7936	0	0	0
1380	Protein ECM25 OS=Saccharomyces cerevisiae (strain ATCC 204508 / S288c) OX=559292 GN=ECM25 PE=1 SV=2	P32525	68	5.9115	1.673	3.2893	1.7636	0	0	0.80758	0	0	0	0	6.1216	7.5872	4.8097
1381	Nucleoporin NUP145 OS=Saccharomyces cerevisiae (strain ATCC 204508 / S288c) OX=559292 GN=NUP145 PE=1 SV=1	P49687	146	1.1823	0	0	0	5.0359	5.1035	5.6531	4.2006	2.1498	2.5966	2.6904	0	0	0
1382	Poly(A) RNA polymerase protein 2 OS=Saccharomyces cerevisiae (strain ATCC 204508 / S288c) OX=559292 GN=PAP2 PE=1 SV=1	P53632	66	0	0	1.0964	0	1.6786	1.7012	4.0379	0.7001	10.749	7.7899	5.3807	0	0	0
1383	Transcription initiation factor TFIID subunit 4 OS=Saccharomyces cerevisiae (strain ATCC 204508 / S288c) OX=559292 GN=TAF4 PE=1 SV=1	P50105	42	0	0	0	1.7636	0	0	0	0	7.5244	11.252	8.9679	1.5304	2.5291	1.2024
1384	Sister chromatid cohesion protein 1 OS=Saccharomyces cerevisiae (strain ATCC 204508 / S288c) OX=559292 GN=MCD1 PE=1 SV=1	Q12158	63	0	0	0	0	3.3572	4.253	4.8455	5.6008	3.2247	1.7311	4.4839	0	0	0
1385	Prefoldin subunit 5 OS=Saccharomyces cerevisiae (strain ATCC 204508 / S288c) OX=559292 GN=GIM5 PE=1 SV=1	Q04493	18	0	0	3.2893	0.8818	6.7145	7.6553	4.0379	4.9007	1.0749	0	0	0	0	0
1386	Folic acid synthesis protein FOL1 OS=Saccharomyces cerevisiae (strain ATCC 204508 / S288c) OX=559292 GN=FOL1 PE=1 SV=2	P53848	93	0	0	1.0964	0.8818	5.8752	3.4024	4.8455	11.202	0	0	0	0	0	0
1387	General transcriptional corepressor CYC8 OS=Saccharomyces cerevisiae (strain ATCC 204508 / S288c) OX=559292 GN=CYC8 PE=1 SV=2	P14922	107	0	0	0	1.7636	9.2324	4.253	3.2303	9.1013	0	0	0	0	0	0
1388	Protein MLP2 OS=Saccharomyces cerevisiae (strain ATCC 204508 / S288c) OX=559292 GN=MLP2 PE=1 SV=1	P40457	195	0	0	0	22.927	1.6786	0	0	2.1003	0	0.86554	0	0	0	0
1389	60S ribosomal protein L42-A OS=Saccharomyces cerevisiae (strain ATCC 204508 / S288c) OX=559292 GN=RPL42A PE=1 SV=1	P0CX27	12	0	0	0	0	0	0	0	0	7.5244	9.5209	7.1743	0	1.2645	1.2024
1390	60S ribosomal protein L37-B OS=Saccharomyces cerevisiae (strain ATCC 204508 / S288c) OX=559292 GN=RPL37B PE=1 SV=2	P51402	10	0	0	0	0	0	0	0	0	17.199	6.0588	4.4839	0	0	0
1391	U6 snRNA-associated Sm-like protein LSm4 OS=Saccharomyces cerevisiae (strain ATCC 204508 / S288c) OX=559292 GN=LSM4 PE=1 SV=1	P40070	21	4.7292	3.3461	3.2893	2.6454	3.3572	2.5518	2.4227	2.1003	1.0749	0	0	3.0608	3.7936	2.4049
1392	Histone H3 OS=Saccharomyces cerevisiae (strain ATCC 204508 / S288c) OX=559292 GN=HHT1 PE=1 SV=2	P61830	15	2.3646	1.673	2.1929	0.8818	0	0	0.80758	0.7001	4.2997	4.3277	2.6904	0	1.2645	1.2024
1393	LOG family protein YJL055W OS=Saccharomyces cerevisiae (strain ATCC 204508 / S288c) OX=559292 GN=YJL055W PE=1 SV=1	P47044	27	1.1823	1.673	5.4822	2.6454	6.7145	1.7012	4.0379	4.9007	0	0	0.89679	1.5304	1.2645	1.2024
1394	Vacuolar membrane protein PEP3 OS=Saccharomyces cerevisiae (strain ATCC 204508 / S288c) OX=559292 GN=PEP3 PE=1 SV=1	P27801	107	3.5469	1.673	2.1929	2.6454	0	0	1.6152	2.8004	0	0	0	1.5304	5.0581	2.4049
1395	ISWI chromatin-remodeling complex ATPase ISW1 OS=Saccharomyces cerevisiae (strain ATCC 204508 / S288c) OX=559292 GN=ISW1 PE=1 SV=2	P38144	131	0	0	0	2.6454	0.83931	0.85059	4.0379	2.8004	4.2997	5.1932	2.6904	3.0608	0	1.2024
1396	U3 small nucleolar RNA-associated protein 12 OS=Saccharomyces cerevisiae (strain ATCC 204508 / S288c) OX=559292 GN=DIP2 PE=1 SV=1	Q12220	106	1.1823	0	4.3857	6.1726	1.6786	0.85059	0.80758	4.2006	4.2997	2.5966	2.6904	0	0	0
1397	Uncharacterized protein YNL134C OS=Saccharomyces cerevisiae (strain ATCC 204508 / S288c) OX=559292 GN=YNL134C PE=1 SV=1	P53912	41	3.5469	5.0191	5.4822	3.5272	0.83931	0	0	2.8004	0	0.86554	0	4.5912	2.5291	3.6073
1398	Ubiquitin-conjugating enzyme E2 1 OS=Saccharomyces cerevisiae (strain ATCC 204508 / S288c) OX=559292 GN=UBC1 PE=1 SV=1	P21734	24	2.3646	0	1.0964	2.6454	0.83931	0.85059	2.4227	4.2006	0	0	0	9.1825	2.5291	2.4049
1399	Spindle pole body component SPC97 OS=Saccharomyces cerevisiae (strain ATCC 204508 / S288c) OX=559292 GN=SPC97 PE=1 SV=1	P38863	97	4.7292	0	0	12.345	0.83931	1.7012	1.6152	2.8004	0	0.86554	0.89679	1.5304	0	1.2024
1400	Serine/threonine-protein kinase KSP1 OS=Saccharomyces cerevisiae (strain ATCC 204508 / S288c) OX=559292 GN=KSP1 PE=1 SV=1	P38691	117	4.7292	0	0	7.0544	0.83931	1.7012	3.2303	4.2006	1.0749	2.5966	4.4839	0	0	0
1401	Mitochondrial import receptor subunit TOM40 OS=Saccharomyces cerevisiae (strain ATCC 204508 / S288c) OX=559292 GN=TOM40 PE=1 SV=1	P23644	42	2.3646	1.673	0	0	4.1966	1.7012	1.6152	4.9007	0	5.1932	6.2775	0	0	1.2024
1402	Flippase kinase 1 OS=Saccharomyces cerevisiae (strain ATCC 204508 / S288c) OX=559292 GN=FPK1 PE=1 SV=1	P53739	101	8.2761	6.6921	3.2893	6.1726	0	0	0	1.4002	0	0	1.7936	3.0608	2.5291	3.6073
1403	Eukaryotic translation initiation factor eIF-1 OS=Saccharomyces cerevisiae (strain ATCC 204508 / S288c) OX=559292 GN=SUI1 PE=1 SV=1	P32911	12	2.3646	3.3461	6.5786	6.1726	0	0	0	0	0	0.86554	0.89679	9.1825	2.5291	6.0121
1404	Protein arginine N-methyltransferase 2 OS=Saccharomyces cerevisiae (strain ATCC 204508 / S288c) OX=559292 GN=RMT2 PE=1 SV=1	Q03305	47	1.1823	0	1.0964	0	6.7145	6.8047	4.8455	3.5005	1.0749	1.7311	1.7936	0	0	0
1405	NAD(+) kinase OS=Saccharomyces cerevisiae (strain ATCC 204508 / S288c) OX=559292 GN=UTR1 PE=1 SV=2	P21373	59	3.5469	0	1.0964	0.8818	5.0359	4.253	4.8455	5.6008	2.1498	0	0	0	0	0
1406	Uncharacterized protein YNL011C OS=Saccharomyces cerevisiae (strain ATCC 204508 / S288c) OX=559292 GN=YNL011C PE=1 SV=1	P53980	50	1.1823	0	0	1.7636	5.8752	1.7012	4.8455	2.8004	4.2997	2.5966	0	0	0	0
1407	NADP-dependent alcohol dehydrogenase 6 OS=Saccharomyces cerevisiae (strain ATCC 204508 / S288c) OX=559292 GN=ADH6 PE=1 SV=1	Q04894	40	4.7292	3.3461	9.8679	7.0544	0	0	0	0	0	0.86554	0	3.0608	5.0581	1.2024
1408	Ubiquitin-conjugating enzyme E2-34 OS=Saccharomyces cerevisiae (strain ATCC 204508 / S288c) OX=559292 GN=CDC34 PE=1 SV=1	P14682	34	0	0	0	0	3.3572	2.5518	1.6152	2.1003	5.3746	6.0588	5.3807	4.5912	0	0
1409	U3 small nucleolar RNA-associated protein 5 OS=Saccharomyces cerevisiae (strain ATCC 204508 / S288c) OX=559292 GN=UTP5 PE=1 SV=1	Q04177	72	9.4584	0	3.2893	6.1726	0	0	1.6152	0.7001	2.1498	4.3277	5.3807	0	0	0
1410	Hexaprenyl pyrophosphate synthase, mitochondrial OS=Saccharomyces cerevisiae (strain ATCC 204508 / S288c) OX=559292 GN=COQ1 PE=1 SV=1	P18900	53	9.4584	0	0	10.582	0.83931	0	0	0	0	0.86554	0.89679	0	1.2645	7.2146
1411	Prefoldin subunit 3 OS=Saccharomyces cerevisiae (strain ATCC 204508 / S288c) OX=559292 GN=PAC10 PE=1 SV=1	P48363	23	0	0	0	0	6.7145	5.9541	6.4607	4.2006	1.0749	0.86554	0	0	0	1.2024
1412	RNA-binding protein NAB6 OS=Saccharomyces cerevisiae (strain ATCC 204508 / S288c) OX=559292 GN=NAB6 PE=1 SV=1	Q03735	126	0	0	4.3857	1.7636	0	0	0	0	7.5244	6.9243	8.0711	0	1.2645	0
1413	Vacuolar protein sorting-associated protein 54 OS=Saccharomyces cerevisiae (strain ATCC 204508 / S288c) OX=559292 GN=VPS54 PE=1 SV=1	Q12071	102	2.3646	0	0	0.8818	2.5179	5.1035	11.306	4.9007	0	0	0	0	0	0
1414	U3 small nucleolar RNA-associated protein 9 OS=Saccharomyces cerevisiae (strain ATCC 204508 / S288c) OX=559292 GN=UTP9 PE=1 SV=1	P38882	65	0	0	0	0	0	2.5518	2.4227	1.4002	8.5993	5.1932	6.2775	0	0	0
1415	Protein disulfide-isomerase EUG1 OS=Saccharomyces cerevisiae (strain ATCC 204508 / S288c) OX=559292 GN=EUG1 PE=1 SV=1	P32474	59	0	0	0	0	8.3931	5.9541	7.2682	5.6008	0	0	0	0	0	0
1416	GPN-loop GTPase 3 OS=Saccharomyces cerevisiae (strain ATCC 204508 / S288c) OX=559292 GN=GPN3 PE=1 SV=1	Q06543	31	2.3646	1.673	2.1929	1.7636	0.83931	1.7012	2.4227	1.4002	2.1498	2.5966	2.6904	3.0608	3.7936	4.8097
1417	37S ribosomal protein S8, mitochondrial OS=Saccharomyces cerevisiae (strain ATCC 204508 / S288c) OX=559292 GN=MRPS8 PE=1 SV=1	Q03799	17	3.5469	1.673	2.1929	4.409	0.83931	0.85059	0.80758	0.7001	0	0.86554	0.89679	4.5912	5.0581	7.2146
1418	RNA polymerase II subunit A C-terminal domain phosphatase SSU72 OS=Saccharomyces cerevisiae (strain ATCC 204508 / S288c) OX=559292 GN=SSU72 PE=1 SV=1	P53538	23	2.3646	1.673	0	2.6454	1.6786	3.4024	3.2303	4.2006	3.2247	2.5966	2.6904	1.5304	0	1.2024
1419	Exosome complex component RRP42 OS=Saccharomyces cerevisiae (strain ATCC 204508 / S288c) OX=559292 GN=RRP42 PE=1 SV=1	Q12277	29	0	1.673	0	1.7636	4.1966	4.253	3.2303	2.8004	2.1498	1.7311	1.7936	1.5304	1.2645	1.2024
1420	Protein SNQ2 OS=Saccharomyces cerevisiae (strain ATCC 204508 / S288c) OX=559292 GN=SNQ2 PE=1 SV=2	P32568	169	8.2761	1.673	2.1929	6.1726	0	0	3.2303	2.1003	0	0.86554	1.7936	1.5304	1.2645	1.2024
1421	Protein ZDS2 OS=Saccharomyces cerevisiae (strain ATCC 204508 / S288c) OX=559292 GN=ZDS2 PE=1 SV=1	P54786	105	2.3646	0	6.5786	7.0544	2.5179	2.5518	0	4.2006	1.0749	3.4622	0.89679	0	0	1.2024
1422	Transcription initiation factor TFIID subunit 3 OS=Saccharomyces cerevisiae (strain ATCC 204508 / S288c) OX=559292 GN=TAF3 PE=1 SV=1	Q12297	40	0	0	0	0.8818	0.83931	0.85059	1.6152	1.4002	9.6742	4.3277	4.4839	4.5912	0	1.2024
1423	Protein phosphatase PP2A regulatory subunit B OS=Saccharomyces cerevisiae (strain ATCC 204508 / S288c) OX=559292 GN=CDC55 PE=1 SV=2	Q00362	60	0	0	3.2893	0.8818	5.8752	3.4024	4.0379	4.9007	1.0749	0.86554	0.89679	0	1.2645	0
1424	Chitin biosynthesis protein CHS6 OS=Saccharomyces cerevisiae (strain ATCC 204508 / S288c) OX=559292 GN=CHS6 PE=1 SV=1	P40955	86	2.3646	5.0191	2.1929	3.5272	0	0	2.4227	2.8004	0	0	0	3.0608	3.7936	3.6073
1425	Arginase OS=Saccharomyces cerevisiae (strain ATCC 204508 / S288c) OX=559292 GN=CAR1 PE=1 SV=1	P00812	36	2.3646	3.3461	2.1929	4.409	2.5179	0	3.2303	6.3009	0	0	0	0	5.0581	3.6073
1426	Succinate dehydrogenase [ubiquinone] flavoprotein subunit, mitochondrial OS=Saccharomyces cerevisiae (strain ATCC 204508 / S288c) OX=559292 GN=SDH1 PE=1 SV=1	Q00711	70	1.1823	0	9.8679	7.9362	1.6786	0.85059	1.6152	3.5005	0	0	1.7936	0	1.2645	0
1427	Cytosolic Fe-S cluster assembly factor CFD1 OS=Saccharomyces cerevisiae (strain ATCC 204508 / S288c) OX=559292 GN=CFD1 PE=1 SV=1	P40558	32	8.2761	0	2.1929	7.9362	0.83931	0	0	2.1003	0	0	0	4.5912	2.5291	4.8097
1428	U3 small nucleolar ribonucleoprotein protein IMP3 OS=Saccharomyces cerevisiae (strain ATCC 204508 / S288c) OX=559292 GN=IMP3 PE=1 SV=1	P32899	22	2.3646	0	3.2893	1.7636	0	0	0	0	6.4495	6.9243	6.2775	0	1.2645	3.6073
1429	Acyl-CoA-binding protein OS=Saccharomyces cerevisiae (strain ATCC 204508 / S288c) OX=559292 GN=ACB1 PE=1 SV=3	P31787	10	5.9115	6.6921	10.964	7.0544	0	0	0	0.7001	0	0	0	1.5304	2.5291	1.2024
1430	Delta-1-pyrroline-5-carboxylate dehydrogenase, mitochondrial OS=Saccharomyces cerevisiae (strain ATCC 204508 / S288c) OX=559292 GN=PUT2 PE=1 SV=2	P07275	64	7.0938	0	0	0.8818	7.5538	0.85059	0	6.3009	0	0.86554	0.89679	0	0	0
1431	Pumilio homology domain family member 6 OS=Saccharomyces cerevisiae (strain ATCC 204508 / S288c) OX=559292 GN=PUF6 PE=1 SV=1	Q04373	75	0	0	0	0.8818	0	0	0.80758	0	13.974	6.9243	5.3807	0	1.2645	0
1432	Coenzyme A biosynthesis protein 3 OS=Saccharomyces cerevisiae (strain ATCC 204508 / S288c) OX=559292 GN=CAB3 PE=1 SV=1	P36076	65	0	0	0	0	2.5179	5.1035	1.6152	4.2006	3.2247	6.9243	4.4839	0	0	0
1433	Protein DML1 OS=Saccharomyces cerevisiae (strain ATCC 204508 / S288c) OX=559292 GN=DML1 PE=3 SV=1	Q03652	55	0	0	0	0	3.3572	1.7012	4.8455	4.9007	9.6742	3.4622	0.89679	0	0	0
1434	Probable alpha-1,6-mannosyltransferase MNN10 OS=Saccharomyces cerevisiae (strain ATCC 204508 / S288c) OX=559292 GN=MNN10 PE=1 SV=1	P50108	47	0	0	0	0	3.3572	3.4024	2.4227	4.2006	3.2247	6.9243	5.3807	0	0	0
1435	Clathrin coat assembly protein AP180A OS=Saccharomyces cerevisiae (strain ATCC 204508 / S288c) OX=559292 GN=YAP1801 PE=1 SV=1	P38856	72	2.3646	0	7.675	7.0544	0	0	0	0.7001	0	0	0	1.5304	5.0581	6.0121
1436	Single-strand telomeric DNA-binding protein GBP2 OS=Saccharomyces cerevisiae (strain ATCC 204508 / S288c) OX=559292 GN=GBP2 PE=1 SV=1	P25555	49	0	0	0	0	6.7145	2.5518	8.8834	2.8004	1.0749	0.86554	3.5871	0	0	0
1437	Aldehyde dehydrogenase [NAD(P)+] 1 OS=Saccharomyces cerevisiae (strain ATCC 204508 / S288c) OX=559292 GN=ALD2 PE=1 SV=2	P47771	55	9.4584	0	8.7714	7.0544	0	0	0	0.7001	0	0	0	1.5304	3.7936	6.0121
1438	Regulatory protein SIR3 OS=Saccharomyces cerevisiae (strain ATCC 204508 / S288c) OX=559292 GN=SIR3 PE=1 SV=6	P06701	111	0	0	4.3857	9.6997	0	0	0	0	0	0.86554	0	3.0608	5.0581	7.2146
1439	Monothiol glutaredoxin-7 OS=Saccharomyces cerevisiae (strain ATCC 204508 / S288c) OX=559292 GN=GRX7 PE=1 SV=1	P38068	23	0	0	0	0	7.5538	6.8047	3.2303	4.9007	0	3.4622	2.6904	0	0	0
1440	Single-stranded DNA-binding protein RIM1, mitochondrial OS=Saccharomyces cerevisiae (strain ATCC 204508 / S288c) OX=559292 GN=RIM1 PE=1 SV=1	P32445	15	1.1823	1.673	2.1929	1.7636	0.83931	1.7012	3.2303	2.1003	2.1498	4.3277	0.89679	1.5304	1.2645	1.2024
1441	Transcription elongation factor 1 OS=Saccharomyces cerevisiae (strain ATCC 204508 / S288c) OX=559292 GN=ELF1 PE=1 SV=1	P36053	16	3.5469	3.3461	1.0964	0.8818	0.83931	0.85059	2.4227	1.4002	4.2997	6.0588	4.4839	0	2.5291	0
1442	Actin-related protein 2/3 complex subunit 3 OS=Saccharomyces cerevisiae (strain ATCC 204508 / S288c) OX=559292 GN=ARC18 PE=1 SV=1	Q05933	21	3.5469	3.3461	1.0964	3.5272	1.6786	2.5518	3.2303	3.5005	0	0.86554	0.89679	1.5304	0	1.2024
1443	Nucleoporin NUP188 OS=Saccharomyces cerevisiae (strain ATCC 204508 / S288c) OX=559292 GN=NUP188 PE=1 SV=1	P52593	189	0	0	2.1929	3.5272	1.6786	1.7012	0.80758	1.4002	1.0749	2.5966	2.6904	3.0608	0	0
1444	6,7-dimethyl-8-ribityllumazine synthase OS=Saccharomyces cerevisiae (strain ATCC 204508 / S288c) OX=559292 GN=RIB4 PE=1 SV=2	P50861	19	2.3646	5.0191	5.4822	2.6454	5.0359	0.85059	0.80758	3.5005	0	0	0	3.0608	2.5291	2.4049
1445	Multiple RNA-binding domain-containing protein 1 OS=Saccharomyces cerevisiae (strain ATCC 204508 / S288c) OX=559292 GN=MRD1 PE=1 SV=1	Q06106	101	3.5469	3.3461	4.3857	6.1726	2.5179	1.7012	0.80758	1.4002	0	0	0	0	6.3226	1.2024
1446	DNA repair protein RAD51 OS=Saccharomyces cerevisiae (strain ATCC 204508 / S288c) OX=559292 GN=RAD51 PE=1 SV=1	P25454	43	3.5469	5.0191	5.4822	2.6454	3.3572	1.7012	2.4227	4.2006	0	0	0.89679	1.5304	0	0
1447	Enhancer of mRNA-decapping protein 3 OS=Saccharomyces cerevisiae (strain ATCC 204508 / S288c) OX=559292 GN=EDC3 PE=1 SV=1	P39998	61	2.3646	1.673	1.0964	7.0544	5.8752	3.4024	0	2.1003	0	0.86554	0	1.5304	0	1.2024
1448	V-type proton ATPase subunit F OS=Saccharomyces cerevisiae (strain ATCC 204508 / S288c) OX=559292 GN=VMA7 PE=1 SV=1	P39111	13	1.1823	0	2.1929	2.6454	3.3572	3.4024	2.4227	3.5005	0	0.86554	1.7936	0	0	2.4049
1449	Monothiol glutaredoxin-5, mitochondrial OS=Saccharomyces cerevisiae (strain ATCC 204508 / S288c) OX=559292 GN=GRX5 PE=1 SV=1	Q02784	17	0	0	2.1929	2.6454	1.6786	3.4024	4.8455	7.7011	0	0.86554	1.7936	0	1.2645	1.2024
1450	SWI/SNF chromatin-remodeling complex subunit SWI1 OS=Saccharomyces cerevisiae (strain ATCC 204508 / S288c) OX=559292 GN=SWI1 PE=1 SV=1	P09547	148	1.1823	1.673	4.3857	16.754	0	0	1.6152	0.7001	0	0	0	1.5304	2.5291	1.2024
1451	25S rRNA (cytosine(2278)-C(5))-methyltransferase OS=Saccharomyces cerevisiae (strain ATCC 204508 / S288c) OX=559292 GN=RCM1 PE=1 SV=1	P53972	56	2.3646	0	4.3857	2.6454	0	0	0.80758	0	0	0.86554	3.5871	1.5304	5.0581	13.227
1452	Transcription initiation factor TFIID subunit 10 OS=Saccharomyces cerevisiae (strain ATCC 204508 / S288c) OX=559292 GN=TAF10 PE=1 SV=1	Q12030	23	0	0	0	0.8818	0.83931	0.85059	2.4227	2.8004	9.6742	6.9243	6.2775	0	0	0
1453	Regulatory protein ADR1 OS=Saccharomyces cerevisiae (strain ATCC 204508 / S288c) OX=559292 GN=ADR1 PE=1 SV=2	P07248	151	0	0	15.35	1.7636	1.6786	0.85059	0.80758	6.3009	0	0.86554	0	0	0	0
1454	DNA-directed RNA polymerase III subunit RPC9 OS=Saccharomyces cerevisiae (strain ATCC 204508 / S288c) OX=559292 GN=RPC17 PE=1 SV=2	P47076	19	0	0	0	0	1.6786	2.5518	4.0379	4.2006	5.3746	5.1932	2.6904	0	0	0
1455	Transcription factor SPT8 OS=Saccharomyces cerevisiae (strain ATCC 204508 / S288c) OX=559292 GN=SPT8 PE=1 SV=1	P38915	66	0	0	0	0	1.6786	3.4024	4.0379	2.8004	3.2247	7.7899	3.5871	0	0	0
1456	Protein BZZ1 OS=Saccharomyces cerevisiae (strain ATCC 204508 / S288c) OX=559292 GN=BZZ1 PE=1 SV=1	P38822	71	0	0	0	0	1.6786	3.4024	4.0379	10.501	2.1498	3.4622	0.89679	0	0	0
1457	Dynamin-like GTPase MGM1, mitochondrial OS=Saccharomyces cerevisiae (strain ATCC 204508 / S288c) OX=559292 GN=MGM1 PE=1 SV=3	P32266	99	5.9115	0	7.675	12.345	0	0	0	0.7001	0	0	0	3.0608	0	3.6073
1458	Invertase 2 OS=Saccharomyces cerevisiae (strain ATCC 204508 / S288c) OX=559292 GN=SUC2 PE=1 SV=1	P00724	61	0	0	0	0	4.1966	5.1035	5.6531	6.3009	0	2.5966	2.6904	0	0	0
1459	Prefoldin subunit 1 OS=Saccharomyces cerevisiae (strain ATCC 204508 / S288c) OX=559292 GN=PFD1 PE=1 SV=2	P46988	13	0	0	1.0964	0	8.3931	8.5059	4.0379	4.2006	1.0749	0	0	0	0	0
1460	Vacuolar protein sorting-associated protein 45 OS=Saccharomyces cerevisiae (strain ATCC 204508 / S288c) OX=559292 GN=VPS45 PE=1 SV=2	P38932	67	0	0	0	0	4.1966	0.85059	0	3.5005	0	6.0588	9.8647	0	0	0
1461	40S ribosomal protein S30-B OS=Saccharomyces cerevisiae (strain ATCC 204508 / S288c) OX=559292 GN=RPS30B PE=1 SV=1	P0CX34	7	0	0	0	0	0	0	1.6152	0.7001	7.5244	10.386	7.1743	0	0	0
1462	Uncharacterized trans-sulfuration enzyme YHR112C OS=Saccharomyces cerevisiae (strain ATCC 204508 / S288c) OX=559292 GN=YHR112C PE=1 SV=1	P38716	42	0	0	0	0	5.0359	5.9541	8.0758	7.7011	0	0	0	0	0	0
1463	Trafficking protein particle complex subunit BET3 OS=Saccharomyces cerevisiae (strain ATCC 204508 / S288c) OX=559292 GN=BET3 PE=1 SV=1	P36149	22	1.1823	3.3461	1.0964	1.7636	1.6786	1.7012	1.6152	1.4002	2.1498	2.5966	1.7936	3.0608	2.5291	2.4049
1464	WW domain-containing protein WWM1 OS=Saccharomyces cerevisiae (strain ATCC 204508 / S288c) OX=559292 GN=WWM1 PE=1 SV=1	P43582	23	2.3646	1.673	3.2893	2.6454	1.6786	2.5518	0	2.1003	4.2997	4.3277	4.4839	0	0	1.2024
1465	Actin-related protein 7 OS=Saccharomyces cerevisiae (strain ATCC 204508 / S288c) OX=559292 GN=ARP7 PE=1 SV=1	Q12406	54	1.1823	0	0	0	2.5179	1.7012	2.4227	3.5005	2.1498	1.7311	5.3807	1.5304	0	1.2024
1466	60S ribosomal protein L34-B OS=Saccharomyces cerevisiae (strain ATCC 204508 / S288c) OX=559292 GN=RPL34B PE=1 SV=1	P40525 (+1)	14	2.3646	3.3461	1.0964	0.8818	0	0.85059	0	0	5.3746	5.1932	2.6904	3.0608	2.5291	2.4049
1467	Histone chaperone RTT106 OS=Saccharomyces cerevisiae (strain ATCC 204508 / S288c) OX=559292 GN=RTT106 PE=1 SV=1	P40161	52	0	0	1.0964	1.7636	2.5179	1.7012	1.6152	3.5005	5.3746	2.5966	4.4839	6.1216	0	0
1468	Uncharacterized phosphatase YNL010W OS=Saccharomyces cerevisiae (strain ATCC 204508 / S288c) OX=559292 GN=YNL010W PE=1 SV=1	P53981	27	4.7292	5.0191	7.675	3.5272	0	0	2.4227	1.4002	0	0.86554	0	3.0608	5.0581	3.6073
1469	NADP-dependent 3-hydroxy acid dehydrogenase OS=Saccharomyces cerevisiae (strain ATCC 204508 / S288c) OX=559292 GN=YMR226C PE=1 SV=1	Q05016	29	2.3646	3.3461	6.5786	5.2908	0	0	0.80758	0.7001	0	0.86554	0	6.1216	8.8517	2.4049
1470	Nucleolar protein 6 OS=Saccharomyces cerevisiae (strain ATCC 204508 / S288c) OX=559292 GN=NOP6 PE=1 SV=1	Q07623	25	4.7292	6.6921	3.2893	5.2908	0	0	0	0	1.0749	0.86554	0.89679	4.5912	7.5872	4.8097
1471	Transcription factor MBP1 OS=Saccharomyces cerevisiae (strain ATCC 204508 / S288c) OX=559292 GN=MBP1 PE=1 SV=1	P39678	94	0	0	1.0964	0	0.83931	0.85059	0.80758	0.7001	4.2997	8.6554	9.8647	3.0608	1.2645	0
1472	Protein TBF1 OS=Saccharomyces cerevisiae (strain ATCC 204508 / S288c) OX=559292 GN=TBF1 PE=1 SV=2	Q02457	63	1.1823	0	0	4.409	0	0.85059	1.6152	0.7001	0	2.5966	0.89679	18.365	0	3.6073
1473	Conserved oligomeric Golgi complex subunit 7 OS=Saccharomyces cerevisiae (strain ATCC 204508 / S288c) OX=559292 GN=COG7 PE=1 SV=1	P53195	32	1.1823	0	0	0.8818	3.3572	2.5518	5.6531	7.7011	0	0	2.6904	1.5304	0	1.2024
1474	Adenine phosphoribosyltransferase 1 OS=Saccharomyces cerevisiae (strain ATCC 204508 / S288c) OX=559292 GN=APT1 PE=1 SV=3	P49435	21	1.1823	0	3.2893	3.5272	4.1966	0	3.2303	4.2006	0	0	0	0	0	2.4049
1475	Reticulon-like protein 1 OS=Saccharomyces cerevisiae (strain ATCC 204508 / S288c) OX=559292 GN=RTN1 PE=1 SV=1	Q04947	33	0	0	1.0964	0.8818	8.3931	1.7012	4.0379	4.9007	0	2.5966	3.5871	0	0	0
1476	Non-histone chromosomal protein 6B OS=Saccharomyces cerevisiae (strain ATCC 204508 / S288c) OX=559292 GN=NHP6B PE=1 SV=3	P11633	11	2.3646	10.038	2.1929	3.5272	0	0	0	0	0	0	0.89679	4.5912	7.5872	4.8097
1477	U2 snRNP component HSH155 OS=Saccharomyces cerevisiae (strain ATCC 204508 / S288c) OX=559292 GN=HSH155 PE=1 SV=1	P49955	110	1.1823	0	6.5786	3.5272	0.83931	0	0	0	5.3746	4.3277	7.1743	0	0	0
1478	Protein SSO1 OS=Saccharomyces cerevisiae (strain ATCC 204508 / S288c) OX=559292 GN=SSO1 PE=1 SV=2	P32867	33	0	0	0	0	5.0359	1.7012	2.4227	2.1003	1.0749	6.9243	5.3807	0	0	0
1479	Protein ERP1 OS=Saccharomyces cerevisiae (strain ATCC 204508 / S288c) OX=559292 GN=ERP1 PE=1 SV=1	Q05359	25	0	0	0	0	3.3572	1.7012	1.6152	2.1003	3.2247	6.0588	7.1743	0	0	0
1480	NAP1-binding protein 2 OS=Saccharomyces cerevisiae (strain ATCC 204508 / S288c) OX=559292 GN=NBP2 PE=1 SV=1	Q12163	27	0	0	0	0	3.3572	2.5518	4.0379	5.6008	6.4495	2.5966	3.5871	0	0	0
1481	MAP kinase kinase MKK2/SSP33 OS=Saccharomyces cerevisiae (strain ATCC 204508 / S288c) OX=559292 GN=MKK2 PE=1 SV=2	P32491	57	7.0938	5.0191	1.0964	8.818	0	0	0	0	0	0	0	3.0608	2.5291	7.2146
1482	IMPACT family member YDL177C OS=Saccharomyces cerevisiae (strain ATCC 204508 / S288c) OX=559292 GN=YDL177C PE=1 SV=1	Q12257	19	3.5469	6.6921	3.2893	2.6454	0	0	0	0	0	0	0	1.5304	10.116	10.822
1483	Protein ERP2 OS=Saccharomyces cerevisiae (strain ATCC 204508 / S288c) OX=559292 GN=ERP2 PE=1 SV=1	P39704	24	0	0	0	0	0.83931	4.253	1.6152	2.8004	3.2247	6.0588	3.5871	0	0	0
1484	Bud neck protein 5 OS=Saccharomyces cerevisiae (strain ATCC 204508 / S288c) OX=559292 GN=BNI5 PE=1 SV=1	P53890	50	0	0	14.254	1.7636	1.6786	3.4024	0	4.9007	0	0	0	0	0	2.4049
1485	Polyadenylation factor subunit 2 OS=Saccharomyces cerevisiae (strain ATCC 204508 / S288c) OX=559292 GN=PFS2 PE=1 SV=1	P42841	53	0	0	0	0	0	2.5518	5.6531	5.6008	4.2997	5.1932	3.5871	0	0	0
1486	Altered inheritance of mitochondria protein 6 OS=Saccharomyces cerevisiae (strain ATCC 204508 / S288c) OX=559292 GN=AIM6 PE=3 SV=2	Q07716	44	0	0	0	0	5.0359	5.1035	4.8455	6.3009	0	1.7311	2.6904	0	0	0
1487	Prefoldin subunit 4 OS=Saccharomyces cerevisiae (strain ATCC 204508 / S288c) OX=559292 GN=GIM3 PE=1 SV=1	P53900	15	0	0	2.1929	0	6.7145	3.4024	6.4607	5.6008	0	0.86554	0	0	0	0
1488	Origin recognition complex subunit 5 OS=Saccharomyces cerevisiae (strain ATCC 204508 / S288c) OX=559292 GN=ORC5 PE=1 SV=1	P50874	55	4.7292	0	10.964	7.9362	0	0	0	0	0	0.86554	0	0	2.5291	6.0121
1489	Ubiquitin ligase-binding protein BUL1 OS=Saccharomyces cerevisiae (strain ATCC 204508 / S288c) OX=559292 GN=BUL1 PE=1 SV=1	P48524	109	2.3646	0	0	7.9362	0	0	0	0	0	0	0	6.1216	0	6.0121
1490	Ubiquitin carboxyl-terminal hydrolase 14 OS=Saccharomyces cerevisiae (strain ATCC 204508 / S288c) OX=559292 GN=UBP14 PE=1 SV=2	P38237	89	0	0	0	0	5.8752	2.5518	6.4607	9.1013	0	0	0	0	0	0
1491	Spindle assembly checkpoint component MAD3 OS=Saccharomyces cerevisiae (strain ATCC 204508 / S288c) OX=559292 GN=MAD3 PE=1 SV=1	P47074	60	9.4584	0	5.4822	11.463	0	0	0	0	0	0	0	0	0	1.2024
1492	AP-3 complex subunit sigma OS=Saccharomyces cerevisiae (strain ATCC 204508 / S288c) OX=559292 GN=APS3 PE=1 SV=1	P47064	22	1.1823	1.673	1.0964	1.7636	4.1966	2.5518	0.80758	1.4002	3.2247	1.7311	2.6904	4.5912	1.2645	2.4049
1493	DNA-directed RNA polymerases I, II, and III subunit RPABC4 OS=Saccharomyces cerevisiae (strain ATCC 204508 / S288c) OX=559292 GN=RPC10 PE=1 SV=1	P40422	8	1.1823	3.3461	0	0	2.5179	1.7012	1.6152	1.4002	3.2247	3.4622	3.5871	3.0608	2.5291	1.2024
1494	Dihydroorotate dehydrogenase (fumarate) OS=Saccharomyces cerevisiae (strain ATCC 204508 / S288c) OX=559292 GN=URA1 PE=1 SV=1	P28272	35	1.1823	5.0191	5.4822	1.7636	0	0	0	0.7001	0	0.86554	0.89679	3.0608	6.3226	3.6073
1495	SEH-associated protein 4 OS=Saccharomyces cerevisiae (strain ATCC 204508 / S288c) OX=559292 GN=SEA4 PE=1 SV=2	P38164	118	0	0	0	3.5272	1.6786	1.7012	0.80758	2.1003	2.1498	7.7899	4.4839	0	1.2645	1.2024
1496	Type 2A phosphatase-associated protein 42 OS=Saccharomyces cerevisiae (strain ATCC 204508 / S288c) OX=559292 GN=TAP42 PE=1 SV=1	Q04372	43	5.9115	0	1.0964	4.409	2.5179	1.7012	0.80758	3.5005	0	0	0	1.5304	1.2645	1.2024
1497	Essential for maintenance of the cell wall protein 1 OS=Saccharomyces cerevisiae (strain ATCC 204508 / S288c) OX=559292 GN=EMW1 PE=1 SV=1	P42842	102	2.3646	1.673	3.2893	1.7636	4.1966	0.85059	4.8455	6.3009	0	0.86554	0	0	0	1.2024
1498	Malate dehydrogenase, mitochondrial OS=Saccharomyces cerevisiae (strain ATCC 204508 / S288c) OX=559292 GN=MDH1 PE=1 SV=2	P17505	36	9.4584	0	5.4822	5.2908	0	0	0	0	0	0.86554	1.7936	1.5304	3.7936	2.4049
1499	Sugar utilization regulatory protein IMP2 OS=Saccharomyces cerevisiae (strain ATCC 204508 / S288c) OX=559292 GN=IMP2' PE=1 SV=2	P32351	39	0	0	1.0964	0.8818	2.5179	0.85059	2.4227	4.2006	5.3746	5.1932	3.5871	0	0	0
1500	Serine/threonine-protein kinase HAL4/SAT4 OS=Saccharomyces cerevisiae (strain ATCC 204508 / S288c) OX=559292 GN=SAT4 PE=1 SV=1	P25333	67	5.9115	3.3461	3.2893	7.0544	0	0	0	0	0	0.86554	0	4.5912	2.5291	4.8097
1501	Sphingoid long chain base kinase 5 OS=Saccharomyces cerevisiae (strain ATCC 204508 / S288c) OX=559292 GN=LCB5 PE=1 SV=1	Q06147	78	0	0	3.2893	0.8818	0	0	2.4227	0	8.5993	6.0588	6.2775	0	1.2645	1.2024
1502	Ubiquitin domain-containing protein DSK2 OS=Saccharomyces cerevisiae (strain ATCC 204508 / S288c) OX=559292 GN=DSK2 PE=1 SV=2	P48510	39	2.3646	3.3461	3.2893	1.7636	0	0	0	0	0	6.0588	8.9679	0	0	0
1503	Nuclear cap-binding protein subunit 2 OS=Saccharomyces cerevisiae (strain ATCC 204508 / S288c) OX=559292 GN=CBC2 PE=1 SV=1	Q08920	24	0	0	0	0	3.3572	2.5518	4.8455	4.2006	2.1498	1.7311	1.7936	0	0	0
1504	Leu/Val/Ile amino-acid permease OS=Saccharomyces cerevisiae (strain ATCC 204508 / S288c) OX=559292 GN=BAP2 PE=1 SV=2	P38084	68	0	0	0	0	3.3572	3.4024	0.80758	4.9007	1.0749	1.7311	4.4839	0	0	0
1505	Protein PET54 OS=Saccharomyces cerevisiae (strain ATCC 204508 / S288c) OX=559292 GN=PET54 PE=1 SV=1	P10834	35	3.5469	0	3.2893	3.5272	0	0	0	0	0	0	0	1.5304	7.5872	9.6194
1506	t-SNARE affecting a late Golgi compartment protein 1 OS=Saccharomyces cerevisiae (strain ATCC 204508 / S288c) OX=559292 GN=TLG1 PE=1 SV=1	Q03322	26	0	0	0	0	1.6786	0	0	2.1003	2.1498	9.5209	6.2775	0	0	0
1507	Protein CBP3, mitochondrial OS=Saccharomyces cerevisiae (strain ATCC 204508 / S288c) OX=559292 GN=CBP3 PE=1 SV=1	P21560	39	8.2761	5.0191	0	5.2908	0	0	0	0	0	0	0	1.5304	2.5291	6.0121
1508	U3 small nucleolar RNA-associated protein 7 OS=Saccharomyces cerevisiae (strain ATCC 204508 / S288c) OX=559292 GN=UTP7 PE=1 SV=1	P40055	62	4.7292	0	4.3857	0.8818	0	0	0	0	0	0	0	3.0608	11.381	9.6194
1509	Choline kinase OS=Saccharomyces cerevisiae (strain ATCC 204508 / S288c) OX=559292 GN=CKI1 PE=1 SV=1	P20485	66	0	0	1.0964	0	5.0359	4.253	6.4607	7.001	0	0	0	0	0	0
1510	Ribosome biogenesis protein NSA2 OS=Saccharomyces cerevisiae (strain ATCC 204508 / S288c) OX=559292 GN=NSA2 PE=1 SV=1	P40078	30	0	0	0	0	0	0	0	0	6.4495	10.386	7.1743	0	0	0
1511	Eukaryotic translation initiation factor 6 OS=Saccharomyces cerevisiae (strain ATCC 204508 / S288c) OX=559292 GN=TIF6 PE=1 SV=1	Q12522	26	2.3646	0	1.0964	2.6454	2.5179	1.7012	2.4227	2.8004	2.1498	2.5966	0.89679	0	1.2645	2.4049
1512	U6 snRNA-associated Sm-like protein LSm6 OS=Saccharomyces cerevisiae (strain ATCC 204508 / S288c) OX=559292 GN=LSM6 PE=1 SV=2	Q06406	9	1.1823	0	2.1929	1.7636	4.1966	2.5518	5.6531	4.2006	0	0.86554	0.89679	1.5304	1.2645	1.2024
1513	Mitogen-activated protein kinase KSS1 OS=Saccharomyces cerevisiae (strain ATCC 204508 / S288c) OX=559292 GN=KSS1 PE=1 SV=1	P14681	43	2.3646	3.3461	4.3857	2.6454	3.3572	2.5518	0.80758	2.1003	1.0749	1.7311	0.89679	3.0608	0	0
1514	E3 ubiquitin-protein ligase DMA2 OS=Saccharomyces cerevisiae (strain ATCC 204508 / S288c) OX=559292 GN=DMA2 PE=1 SV=1	P53924	58	3.5469	0	3.2893	3.5272	0.83931	0.85059	0.80758	1.4002	5.3746	3.4622	3.5871	1.5304	0	0
1515	54S ribosomal protein L12, mitochondrial OS=Saccharomyces cerevisiae (strain ATCC 204508 / S288c) OX=559292 GN=MNP1 PE=1 SV=1	P53163	21	2.3646	5.0191	1.0964	3.5272	0	1.7012	0	0	1.0749	2.5966	2.6904	4.5912	3.7936	2.4049
1516	UBX domain-containing protein 4 OS=Saccharomyces cerevisiae (strain ATCC 204508 / S288c) OX=559292 GN=UBX4 PE=1 SV=1	P54730	47	4.7292	1.673	2.1929	3.5272	0.83931	0.85059	0	1.4002	0	0	0	9.1825	3.7936	3.6073
1517	Transcription regulatory protein SNF2 OS=Saccharomyces cerevisiae (strain ATCC 204508 / S288c) OX=559292 GN=SNF2 PE=1 SV=1	P22082	194	0	0	0	0.8818	2.5179	4.253	1.6152	2.1003	4.2997	3.4622	4.4839	1.5304	0	0
1518	Kinesin-related protein SMY1 OS=Saccharomyces cerevisiae (strain ATCC 204508 / S288c) OX=559292 GN=SMY1 PE=1 SV=1	P32364	74	9.4584	0	0	8.818	0.83931	0.85059	0.80758	0.7001	0	0	0.89679	0	1.2645	6.0121
1519	Mannose-6-phosphate isomerase OS=Saccharomyces cerevisiae (strain ATCC 204508 / S288c) OX=559292 GN=PMI40 PE=1 SV=4	P29952	48	3.5469	3.3461	7.675	3.5272	0	0	0	0.7001	0	0	0.89679	1.5304	6.3226	4.8097
1520	SMY2 homolog 2 OS=Saccharomyces cerevisiae (strain ATCC 204508 / S288c) OX=559292 GN=SYH1 PE=1 SV=1	Q02875	94	2.3646	3.3461	0	6.1726	0	0	0	0	0	0.86554	0.89679	3.0608	6.3226	8.417
1521	DNA-directed RNA polymerase II subunit RPB7 OS=Saccharomyces cerevisiae (strain ATCC 204508 / S288c) OX=559292 GN=RPB7 PE=1 SV=1	P34087	19	0	0	0	0.8818	3.3572	4.253	5.6531	5.6008	2.1498	1.7311	1.7936	0	0	0
1522	Pre-mRNA-splicing factor PRP11 OS=Saccharomyces cerevisiae (strain ATCC 204508 / S288c) OX=559292 GN=PRP11 PE=1 SV=1	Q07350	30	4.7292	5.0191	2.1929	3.5272	0	0	0	0.7001	0	0	0	7.652	7.5872	3.6073
1523	GPN-loop GTPase 2 OS=Saccharomyces cerevisiae (strain ATCC 204508 / S288c) OX=559292 GN=GPN2 PE=1 SV=1	Q08726	40	0	0	0	0	0.83931	2.5518	5.6531	4.2006	3.2247	3.4622	4.4839	1.5304	0	0
1524	CCR4-NOT transcriptional complex subunit CAF120 OS=Saccharomyces cerevisiae (strain ATCC 204508 / S288c) OX=559292 GN=CAF120 PE=1 SV=1	P53836	118	5.9115	1.673	4.3857	6.1726	0	0	0	0	0	0	0	1.5304	7.5872	4.8097
1525	Polynucleotide 3'-phosphatase OS=Saccharomyces cerevisiae (strain ATCC 204508 / S288c) OX=559292 GN=TPP1 PE=3 SV=1	Q03796	27	4.7292	3.3461	2.1929	4.409	0	0	0	0	0	0	0	4.5912	6.3226	4.8097
1526	DNA polymerase epsilon subunit D OS=Saccharomyces cerevisiae (strain ATCC 204508 / S288c) OX=559292 GN=DPB4 PE=1 SV=1	Q04603	22	0	0	0	0	0.83931	1.7012	3.2303	3.5005	2.1498	5.1932	7.1743	0	0	0
1527	Ribosomal RNA-processing protein 17 OS=Saccharomyces cerevisiae (strain ATCC 204508 / S288c) OX=559292 GN=RRP17 PE=1 SV=1	Q04031	28	0	0	0	0	0	0	0.80758	0	6.4495	4.3277	4.4839	3.0608	6.3226	2.4049
1528	Protein TEX1 OS=Saccharomyces cerevisiae (strain ATCC 204508 / S288c) OX=559292 GN=TEX1 PE=1 SV=1	P53851	47	0	0	0	0	0.83931	1.7012	4.0379	2.1003	6.4495	5.1932	3.5871	0	0	0
1529	Uncharacterized protein YOL036W OS=Saccharomyces cerevisiae (strain ATCC 204508 / S288c) OX=559292 GN=YOL036W PE=1 SV=1	Q08206	84	1.1823	0	0	11.463	0	0.85059	0	0	0	0	0	3.0608	6.3226	6.0121
1530	Superkiller protein 7 OS=Saccharomyces cerevisiae (strain ATCC 204508 / S288c) OX=559292 GN=SKI7 PE=1 SV=1	Q08491	85	0	0	0	0.8818	4.1966	5.1035	4.0379	7.001	0	0	0	0	0	0
1531	DnaJ-like chaperone JEM1 OS=Saccharomyces cerevisiae (strain ATCC 204508 / S288c) OX=559292 GN=JEM1 PE=1 SV=3	P40358	75	1.1823	0	5.4822	0.8818	0	0	0	0	0	0	0	3.0608	16.439	4.8097
1532	Sterol 24-C-methyltransferase OS=Saccharomyces cerevisiae (strain ATCC 204508 / S288c) OX=559292 GN=ERG6 PE=1 SV=4	P25087	43	0	0	0	2.6454	4.1966	0.85059	6.4607	6.3009	0	0	0	0	0	0
1533	Tyrosine--tRNA ligase, mitochondrial OS=Saccharomyces cerevisiae (strain ATCC 204508 / S288c) OX=559292 GN=MSY1 PE=1 SV=1	P48527	55	8.2761	1.673	0	3.5272	0	0	0	0	0	0	0	0	10.116	8.417
1534	Nucleoporin NUP120 OS=Saccharomyces cerevisiae (strain ATCC 204508 / S288c) OX=559292 GN=NUP120 PE=1 SV=1	P35729	120	0	0	0	0	5.0359	4.253	7.2682	4.9007	0	0	0.89679	0	0	0
1535	Guanine nucleotide exchange factor subunit RIC1 OS=Saccharomyces cerevisiae (strain ATCC 204508 / S288c) OX=559292 GN=RIC1 PE=1 SV=1	P40395	122	0	0	0	0	5.8752	5.9541	4.8455	7.001	0	0	0	0	0	0
1536	Phosphoinositide phosphatase SAC1 OS=Saccharomyces cerevisiae (strain ATCC 204508 / S288c) OX=559292 GN=SAC1 PE=1 SV=1	P32368	71	0	0	0	0	4.1966	4.253	4.0379	9.1013	0	0	0	0	0	0
1537	Glutathione peroxidase-like peroxiredoxin 2 OS=Saccharomyces cerevisiae (strain ATCC 204508 / S288c) OX=559292 GN=GPX2 PE=1 SV=1	P38143	18	3.5469	1.673	3.2893	5.2908	0.83931	0.85059	0.80758	0.7001	0	0.86554	0.89679	4.5912	3.7936	2.4049
1538	Chromatin assembly factor 1 subunit p50 OS=Saccharomyces cerevisiae (strain ATCC 204508 / S288c) OX=559292 GN=MSI1 PE=1 SV=1	P13712	47	1.1823	1.673	0	1.7636	1.6786	1.7012	1.6152	2.1003	1.0749	0.86554	0.89679	6.1216	5.0581	2.4049
1539	Nucleolar GTP-binding protein 1 OS=Saccharomyces cerevisiae (strain ATCC 204508 / S288c) OX=559292 GN=NOG1 PE=1 SV=1	Q02892	74	1.1823	1.673	5.4822	0	0.83931	0.85059	0.80758	0	1.0749	1.7311	2.6904	1.5304	1.2645	2.4049
1540	Guanine nucleotide-binding protein subunit beta 1 OS=Saccharomyces cerevisiae (strain ATCC 204508 / S288c) OX=559292 GN=GPB1 PE=1 SV=1	Q08886	101	2.3646	0	4.3857	2.6454	0.83931	1.7012	2.4227	3.5005	1.0749	1.7311	0.89679	0	1.2645	0
1541	LAS seventeen-binding protein 1 OS=Saccharomyces cerevisiae (strain ATCC 204508 / S288c) OX=559292 GN=LSB1 PE=1 SV=1	P53281	26	0	0	0	0	1.6786	2.5518	1.6152	3.5005	2.1498	3.4622	4.4839	1.5304	1.2645	1.2024
1542	Histone H2A.Z OS=Saccharomyces cerevisiae (strain ATCC 204508 / S288c) OX=559292 GN=HTZ1 PE=1 SV=3	Q12692	14	3.5469	3.3461	3.2893	2.6454	0	0	0	0	2.1498	1.7311	2.6904	4.5912	5.0581	2.4049
1543	Chromatin structure-remodeling complex protein RSC6 OS=Saccharomyces cerevisiae (strain ATCC 204508 / S288c) OX=559292 GN=RSC6 PE=1 SV=1	P25632	54	0	0	0	0	1.6786	1.7012	3.2303	1.4002	3.2247	6.0588	2.6904	3.0608	0	0
1544	60S ribosomal protein L36-B OS=Saccharomyces cerevisiae (strain ATCC 204508 / S288c) OX=559292 GN=RPL36B PE=1 SV=3	O14455	11	1.1823	0	2.1929	2.6454	0	0	0.80758	0	5.3746	6.0588	4.4839	0	2.5291	2.4049
1545	MAP kinase kinase MKK1/SSP32 OS=Saccharomyces cerevisiae (strain ATCC 204508 / S288c) OX=559292 GN=MKK1 PE=1 SV=1	P32490	57	4.7292	3.3461	3.2893	9.6997	0.83931	0.85059	0	0.7001	0	0	0	0	1.2645	1.2024
1546	37S ribosomal protein S17, mitochondrial OS=Saccharomyces cerevisiae (strain ATCC 204508 / S288c) OX=559292 GN=MRPS17 PE=1 SV=1	Q03246	28	7.0938	6.6921	2.1929	3.5272	0	0	0	0	0	0.86554	0	1.5304	3.7936	6.0121
1547	Synchronized import protein 1 OS=Saccharomyces cerevisiae (strain ATCC 204508 / S288c) OX=559292 GN=SYO1 PE=1 SV=1	Q07395	70	0	0	1.0964	0	4.1966	5.1035	1.6152	7.001	0	0.86554	0.89679	1.5304	0	0
1548	ARS-binding factor 1 OS=Saccharomyces cerevisiae (strain ATCC 204508 / S288c) OX=559292 GN=ABF1 PE=1 SV=4	P14164	82	0	0	0	4.409	2.5179	3.4024	3.2303	3.5005	1.0749	1.7311	3.5871	0	0	0
1549	Transcription initiation factor IIE subunit alpha OS=Saccharomyces cerevisiae (strain ATCC 204508 / S288c) OX=559292 GN=TFA1 PE=1 SV=1	P36100	55	0	0	12.061	0.8818	1.6786	3.4024	0	0.7001	3.2247	1.7311	3.5871	0	0	0
1550	Nonsense-mediated mRNA decay protein 5 OS=Saccharomyces cerevisiae (strain ATCC 204508 / S288c) OX=559292 GN=NMD5 PE=1 SV=2	P46970	120	2.3646	0	1.0964	3.5272	1.6786	0	4.0379	2.8004	0	0	0	13.774	0	0
1551	RNA polymerase II assembly factor RTP1 OS=Saccharomyces cerevisiae (strain ATCC 204508 / S288c) OX=559292 GN=RTP1 PE=1 SV=1	Q12751	113	0	0	0	0	5.0359	4.253	4.0379	3.5005	2.1498	1.7311	0.89679	0	0	0
1552	Condensin complex subunit 2 OS=Saccharomyces cerevisiae (strain ATCC 204508 / S288c) OX=559292 GN=BRN1 PE=1 SV=3	P38170	86	0	0	0	0	2.5179	2.5518	5.6531	3.5005	3.2247	2.5966	3.5871	0	0	0
1553	Arrestin-related trafficking adapter 5 OS=Saccharomyces cerevisiae (strain ATCC 204508 / S288c) OX=559292 GN=ART5 PE=1 SV=1	P53244	65	1.1823	1.673	7.675	1.7636	0	0	0	0	0	0	0	1.5304	8.8517	7.2146
1554	Histone chaperone ASF1 OS=Saccharomyces cerevisiae (strain ATCC 204508 / S288c) OX=559292 GN=ASF1 PE=1 SV=1	P32447	32	0	0	0	0	3.3572	3.4024	1.6152	2.8004	6.4495	5.1932	3.5871	0	0	0
1555	Endo-1,3(4)-beta-glucanase 1 OS=Saccharomyces cerevisiae (strain ATCC 204508 / S288c) OX=559292 GN=DSE4 PE=1 SV=1	P53753	121	0	0	0	0	3.3572	4.253	5.6531	7.001	1.0749	0.86554	0.89679	0	0	0
1556	Low-affinity phosphate transporter PHO90 OS=Saccharomyces cerevisiae (strain ATCC 204508 / S288c) OX=559292 GN=PHO90 PE=1 SV=1	P39535	98	0	0	0	0	3.3572	1.7012	0.80758	4.9007	3.2247	5.1932	6.2775	0	0	0
1557	Phosducin-like protein 1 OS=Saccharomyces cerevisiae (strain ATCC 204508 / S288c) OX=559292 GN=PLP1 PE=1 SV=1	Q04004	27	0	0	0	0.8818	5.0359	3.4024	4.0379	2.8004	0	0.86554	0	0	0	0
1558	General transcription and DNA repair factor IIH helicase subunit XPD OS=Saccharomyces cerevisiae (strain ATCC 204508 / S288c) OX=559292 GN=RAD3 PE=1 SV=1	P06839	90	0	0	2.1929	0.8818	2.5179	0.85059	8.8834	7.001	0	0	0	0	0	0
1559	Peroxisomal ATPase PEX6 OS=Saccharomyces cerevisiae (strain ATCC 204508 / S288c) OX=559292 GN=PEX6 PE=1 SV=1	P33760	116	0	0	0	0	5.0359	4.253	4.0379	6.3009	3.2247	0.86554	0	0	0	0
1560	Nicotinate phosphoribosyltransferase OS=Saccharomyces cerevisiae (strain ATCC 204508 / S288c) OX=559292 GN=NPT1 PE=1 SV=3	P39683	49	1.1823	1.673	13.157	7.9362	0	0	0	0	0	0	0	0	2.5291	4.8097
1561	Hydroxymethylpyrimidine/phosphomethylpyrimidine kinase THI20 OS=Saccharomyces cerevisiae (strain ATCC 204508 / S288c) OX=559292 GN=THI20 PE=1 SV=1	Q08224	61	7.0938	1.673	1.0964	12.345	0.83931	0	0	3.5005	0	0	0	0	0	0
1562	Protein SGM1 OS=Saccharomyces cerevisiae (strain ATCC 204508 / S288c) OX=559292 GN=SGM1 PE=1 SV=1	P47166	81	0	0	0	0	2.5179	4.253	4.8455	7.7011	0	0	0	0	0	0
1563	Probable GTPase-activating protein GYL1 OS=Saccharomyces cerevisiae (strain ATCC 204508 / S288c) OX=559292 GN=GYL1 PE=1 SV=1	Q04322	82	0	0	0	0	3.3572	4.253	6.4607	7.7011	0	0	0	0	0	0
1564	Serine/threonine-protein phosphatase PP-Z2 OS=Saccharomyces cerevisiae (strain ATCC 204508 / S288c) OX=559292 GN=PPZ2 PE=1 SV=4	P33329	78	0	0	3.2893	0	0	0	0	0	0	0	1.7936	0	5.0581	0
1565	NAD-dependent protein deacetylase HST2 OS=Saccharomyces cerevisiae (strain ATCC 204508 / S288c) OX=559292 GN=HST2 PE=1 SV=1	P53686	40	3.5469	1.673	4.3857	1.7636	2.5179	1.7012	1.6152	1.4002	0	0.86554	0	3.0608	3.7936	3.6073
1566	Serine/threonine-protein kinase KIN28 OS=Saccharomyces cerevisiae (strain ATCC 204508 / S288c) OX=559292 GN=KIN28 PE=1 SV=1	P06242	35	2.3646	1.673	3.2893	3.5272	1.6786	0.85059	1.6152	2.1003	0	0	0.89679	3.0608	1.2645	4.8097
1567	Assembly chaperone of RPL4 OS=Saccharomyces cerevisiae (strain ATCC 204508 / S288c) OX=559292 GN=ACL4 PE=1 SV=1	Q03771	43	3.5469	1.673	1.0964	3.5272	0.83931	0.85059	4.0379	3.5005	0	0	0	6.1216	2.5291	2.4049
1568	Vacuolar protein sorting-associated protein 16 OS=Saccharomyces cerevisiae (strain ATCC 204508 / S288c) OX=559292 GN=VPS16 PE=1 SV=2	Q03308	93	0	0	3.2893	0.8818	0.83931	0	2.4227	2.1003	3.2247	0.86554	0.89679	1.5304	5.0581	1.2024
1569	Exosome complex component SKI6 OS=Saccharomyces cerevisiae (strain ATCC 204508 / S288c) OX=559292 GN=SKI6 PE=1 SV=1	P46948	28	2.3646	1.673	1.0964	1.7636	4.1966	4.253	3.2303	4.2006	0	0	0	0	1.2645	1.2024
1570	Nuclear polyadenylated RNA-binding protein 4 OS=Saccharomyces cerevisiae (strain ATCC 204508 / S288c) OX=559292 GN=HRP1 PE=1 SV=1	Q99383	60	0	0	1.0964	0.8818	3.3572	3.4024	2.4227	4.9007	2.1498	0.86554	0.89679	0	0	0
1571	Transcriptional activator SPT7 OS=Saccharomyces cerevisiae (strain ATCC 204508 / S288c) OX=559292 GN=SPT7 PE=1 SV=1	P35177	153	0	0	0	2.6454	0.83931	1.7012	1.6152	1.4002	4.2997	4.3277	4.4839	3.0608	0	0
1572	Vacuolar protein-sorting-associated protein 46 OS=Saccharomyces cerevisiae (strain ATCC 204508 / S288c) OX=559292 GN=DID2 PE=1 SV=1	P69771	23	0	0	1.0964	0.8818	3.3572	0.85059	0	3.5005	1.0749	6.0588	4.4839	0	0	0
1573	GTP-binding protein RHO3 OS=Saccharomyces cerevisiae (strain ATCC 204508 / S288c) OX=559292 GN=RHO3 PE=1 SV=2	Q00245	25	0	0	0	0	0.83931	1.7012	3.2303	4.2006	4.2997	3.4622	4.4839	0	1.2645	0
1574	Chromatin-remodeling ATPase INO80 OS=Saccharomyces cerevisiae (strain ATCC 204508 / S288c) OX=559292 GN=INO80 PE=1 SV=1	P53115	171	0	0	1.0964	0.8818	0	0	0.80758	0	6.4495	6.0588	6.2775	1.5304	0	0
1575	Tyrosine-protein phosphatase SIW14 OS=Saccharomyces cerevisiae (strain ATCC 204508 / S288c) OX=559292 GN=SIW14 PE=1 SV=1	P53965	33	1.1823	0	0	0	3.3572	7.6553	2.4227	2.1003	1.0749	1.7311	2.6904	0	0	0
1576	Glycine dehydrogenase (decarboxylating), mitochondrial OS=Saccharomyces cerevisiae (strain ATCC 204508 / S288c) OX=559292 GN=GCV2 PE=1 SV=1	P49095	114	0	0	7.675	5.2908	1.6786	0	0.80758	4.2006	0	0	0.89679	0	1.2645	4.8097
1577	GTPase-activating protein GYP2 OS=Saccharomyces cerevisiae (strain ATCC 204508 / S288c) OX=559292 GN=MDR1 PE=1 SV=1	P53258	109	0	1.673	1.0964	0	5.8752	4.253	3.2303	4.2006	0	0	0.89679	1.5304	0	0
1578	Pre-mRNA-processing factor 31 OS=Saccharomyces cerevisiae (strain ATCC 204508 / S288c) OX=559292 GN=PRP31 PE=1 SV=2	P49704	56	0	0	6.5786	7.9362	0	1.7012	0.80758	0.7001	0	2.5966	0	0	0	6.0121
1579	Flocculation suppression protein OS=Saccharomyces cerevisiae (strain ATCC 204508 / S288c) OX=559292 GN=SFL1 PE=1 SV=3	P20134	83	4.7292	0	2.1929	12.345	0.83931	0.85059	0	0.7001	0	0	0	1.5304	0	3.6073
1580	Protein STE50 OS=Saccharomyces cerevisiae (strain ATCC 204508 / S288c) OX=559292 GN=STE50 PE=1 SV=1	P25344	39	0	0	0	0	3.3572	2.5518	0.80758	2.8004	5.3746	3.4622	5.3807	0	0	0
1581	DNA mismatch repair protein HSM3 OS=Saccharomyces cerevisiae (strain ATCC 204508 / S288c) OX=559292 GN=HSM3 PE=1 SV=1	P38348	56	0	0	0	0	4.1966	3.4024	3.2303	4.2006	4.2997	0	2.6904	0	0	1.2024
1582	Eisosome protein SEG1 OS=Saccharomyces cerevisiae (strain ATCC 204508 / S288c) OX=559292 GN=SEG1 PE=1 SV=1	Q04279	106	0	0	0	1.7636	0	0	0	0	8.5993	3.4622	3.5871	1.5304	3.7936	7.2146
1583	Regulator of drug sensitivity 2 OS=Saccharomyces cerevisiae (strain ATCC 204508 / S288c) OX=559292 GN=RDS2 PE=1 SV=2	P19541	50	5.9115	3.3461	1.0964	7.0544	0	0	0	0	0	0	0	3.0608	3.7936	6.0121
1584	Probable ATP-dependent permease OS=Saccharomyces cerevisiae (strain ATCC 204508 / S288c) OX=559292 GN=ADP1 PE=1 SV=2	P25371	117	0	0	0	0	1.6786	0.85059	1.6152	3.5005	2.1498	4.3277	7.1743	0	0	0
1585	Nucleolar protein 13 OS=Saccharomyces cerevisiae (strain ATCC 204508 / S288c) OX=559292 GN=NOP13 PE=1 SV=2	P53883	46	3.5469	5.0191	2.1929	5.2908	0	0	0	0	0	0	0	1.5304	8.8517	4.8097
1586	Prefoldin subunit 2 OS=Saccharomyces cerevisiae (strain ATCC 204508 / S288c) OX=559292 GN=GIM4 PE=1 SV=2	P40005	13	0	0	1.0964	0.8818	3.3572	8.5059	4.8455	2.8004	0	0	0	0	0	1.2024
1587	General negative regulator of transcription subunit 4 OS=Saccharomyces cerevisiae (strain ATCC 204508 / S288c) OX=559292 GN=MOT2 PE=1 SV=1	P34909	65	0	0	0	4.409	4.1966	5.1035	0	5.6008	0	1.7311	1.7936	0	0	0
1588	Mitochondrial RNA-splicing protein MRS1 OS=Saccharomyces cerevisiae (strain ATCC 204508 / S288c) OX=559292 GN=MRS1 PE=1 SV=2	P07266	41	4.7292	0	4.3857	1.7636	0	0	0	0	0	0	0	3.0608	11.381	4.8097
1589	Cytochrome b-c1 complex subunit 2, mitochondrial OS=Saccharomyces cerevisiae (strain ATCC 204508 / S288c) OX=559292 GN=QCR2 PE=1 SV=1	P07257	40	0	0	2.1929	0	0	0.85059	1.6152	3.5005	0	6.0588	7.1743	0	0	0
1590	H/ACA ribonucleoprotein complex subunit NOP10 OS=Saccharomyces cerevisiae (strain ATCC 204508 / S288c) OX=559292 GN=NOP10 PE=1 SV=1	Q6Q547	7	1.1823	0	1.0964	0	0	0	0	0	4.2997	6.0588	7.1743	0	5.0581	0
1591	Killer toxin-resistance protein 5 OS=Saccharomyces cerevisiae (strain ATCC 204508 / S288c) OX=559292 GN=KRE5 PE=1 SV=2	P22023	156	0	0	0	0	3.3572	4.253	6.4607	4.9007	0	0	0	0	0	0
1592	Probable 2-methylcitrate dehydratase OS=Saccharomyces cerevisiae (strain ATCC 204508 / S288c) OX=559292 GN=PDH1 PE=1 SV=1	Q12428	58	15.37	10.038	0	6.1726	0	0	0	0	0	0	0	0	0	1.2024
1593	Negative regulator of RAS-cAMP pathway OS=Saccharomyces cerevisiae (strain ATCC 204508 / S288c) OX=559292 GN=MKS1 PE=1 SV=2	P34072	66	0	0	1.0964	0	4.1966	5.9541	0	7.7011	0	0	0	0	0	0
1594	Probable alanine aminotransferase OS=Saccharomyces cerevisiae (strain ATCC 204508 / S288c) OX=559292 GN=ALT2 PE=1 SV=1	P52892	57	3.5469	1.673	1.0964	0.8818	1.6786	0.85059	0.80758	1.4002	0	0.86554	0.89679	6.1216	5.0581	2.4049
1595	Prohibitin-2 OS=Saccharomyces cerevisiae (strain ATCC 204508 / S288c) OX=559292 GN=PHB2 PE=1 SV=2	P50085	34	5.9115	3.3461	1.0964	1.7636	1.6786	0.85059	0.80758	0.7001	0	1.7311	0.89679	0	6.3226	1.2024
1596	Nucleolar complex protein 4 OS=Saccharomyces cerevisiae (strain ATCC 204508 / S288c) OX=559292 GN=NOC4 PE=1 SV=1	Q06512	64	3.5469	1.673	3.2893	3.5272	0	0	0.80758	0.7001	3.2247	1.7311	0.89679	0	1.2645	4.8097
1597	Protein phosphatase 2C homolog 1 OS=Saccharomyces cerevisiae (strain ATCC 204508 / S288c) OX=559292 GN=PTC1 PE=1 SV=1	P35182	32	2.3646	0	1.0964	0.8818	1.6786	2.5518	4.8455	2.8004	2.1498	2.5966	2.6904	0	0	0
1598	Translation machinery-associated protein 16 OS=Saccharomyces cerevisiae (strain ATCC 204508 / S288c) OX=559292 GN=TMA16 PE=1 SV=2	Q08687	21	4.7292	1.673	3.2893	1.7636	0	0	0	0	0	0.86554	0.89679	3.0608	8.8517	2.4049
1599	Vacuolar morphogenesis protein 7 OS=Saccharomyces cerevisiae (strain ATCC 204508 / S288c) OX=559292 GN=VAM7 PE=1 SV=1	P32912	37	4.7292	5.0191	7.675	2.6454	0	0	0	0	0	1.7311	0.89679	1.5304	3.7936	2.4049
1600	Negative regulator of sporulation PMD1 OS=Saccharomyces cerevisiae (strain ATCC 204508 / S288c) OX=559292 GN=PMD1 PE=1 SV=1	P32634	195	1.1823	0	0	6.1726	1.6786	2.5518	0.80758	4.2006	2.1498	0.86554	0.89679	0	0	0
1601	SNF1 protein kinase subunit beta-1 OS=Saccharomyces cerevisiae (strain ATCC 204508 / S288c) OX=559292 GN=SIP1 PE=1 SV=2	P32578	91	0	0	0	0	2.5179	4.253	0.80758	4.2006	3.2247	2.5966	3.5871	0	0	1.2024
1602	Histidine protein methyltransferase 1 OS=Saccharomyces cerevisiae (strain ATCC 204508 / S288c) OX=559292 GN=HPM1 PE=1 SV=1	P40481	43	0	1.673	0	0	1.6786	1.7012	3.2303	4.9007	1.0749	2.5966	3.5871	0	0	0
1603	Histone acetyltransferase ESA1 OS=Saccharomyces cerevisiae (strain ATCC 204508 / S288c) OX=559292 GN=ESA1 PE=1 SV=1	Q08649	53	10.641	3.3461	4.3857	2.6454	0	0	0	0	0	0	0	3.0608	3.7936	2.4049
1604	Homocysteine S-methyltransferase 2 OS=Saccharomyces cerevisiae (strain ATCC 204508 / S288c) OX=559292 GN=SAM4 PE=1 SV=1	Q08985	37	3.5469	5.0191	9.8679	4.409	0	0	0	0	0	0	0	3.0608	2.5291	2.4049
1605	Hit family protein 1 OS=Saccharomyces cerevisiae (strain ATCC 204508 / S288c) OX=559292 GN=HNT1 PE=1 SV=2	Q04344	18	3.5469	3.3461	8.7714	3.5272	0	0	0	0	0	0	0	1.5304	5.0581	0
1606	ATP synthase subunit 5, mitochondrial OS=Saccharomyces cerevisiae (strain ATCC 204508 / S288c) OX=559292 GN=ATP5 PE=1 SV=1	P09457	23	7.0938	3.3461	4.3857	9.6997	0	0	0	0	0	0	0	1.5304	1.2645	3.6073
1607	RNA exonuclease 3 OS=Saccharomyces cerevisiae (strain ATCC 204508 / S288c) OX=559292 GN=REX3 PE=1 SV=1	Q12090	46	4.7292	1.673	2.1929	5.2908	0	0	0	0	0	0	0	1.5304	7.5872	4.8097
1608	PWWP domain-containing protein YLR455W OS=Saccharomyces cerevisiae (strain ATCC 204508 / S288c) OX=559292 GN=YLR455W PE=1 SV=1	Q06188	36	1.1823	3.3461	4.3857	2.6454	0	0	0	0	0	0	0	3.0608	11.381	6.0121
1609	Altered inheritance of mitochondria protein 9, mitochondrial OS=Saccharomyces cerevisiae (strain ATCC 204508 / S288c) OX=559292 GN=AIM9 PE=1 SV=1	P40053	72	3.5469	0	4.3857	6.1726	0.83931	0	0	0	0	0	0	0	3.7936	1.2024
1610	Decapping nuclease RAI1 OS=Saccharomyces cerevisiae (strain ATCC 204508 / S288c) OX=559292 GN=RAI1 PE=1 SV=3	P53063	45	2.3646	3.3461	0	0	5.0359	5.1035	4.8455	2.1003	0	0	0	0	0	0
1611	Putative tyrosine-protein phosphatase OCA1 OS=Saccharomyces cerevisiae (strain ATCC 204508 / S288c) OX=559292 GN=OCA1 PE=1 SV=1	P50946	27	0	0	0	0	2.5179	4.253	4.0379	3.5005	0	2.5966	3.5871	0	0	0
1612	Protein EMP46 OS=Saccharomyces cerevisiae (strain ATCC 204508 / S288c) OX=559292 GN=EMP46 PE=1 SV=1	Q12396	51	0	0	0	0	0.83931	0.85059	0	4.9007	1.0749	4.3277	5.3807	0	0	0
1613	Alpha-1,3-mannosyltransferase MNT3 OS=Saccharomyces cerevisiae (strain ATCC 204508 / S288c) OX=559292 GN=MNT3 PE=1 SV=1	P40549	72	0	0	0	0	1.6786	1.7012	0.80758	7.001	0	3.4622	5.3807	0	0	0
1614	Constitutive acid phosphatase OS=Saccharomyces cerevisiae (strain ATCC 204508 / S288c) OX=559292 GN=PHO3 PE=1 SV=2	P24031	53	2.3646	0	3.2893	2.6454	0	0.85059	2.4227	2.1003	0	0	0	0	3.7936	0
1615	Nucleoporin NUP192 OS=Saccharomyces cerevisiae (strain ATCC 204508 / S288c) OX=559292 GN=NUP192 PE=1 SV=1	P47054	192	3.5469	0	0	14.991	0.83931	0.85059	0	0	0	0	0.89679	1.5304	0	0
1616	Binder of USO1 and GRH1 protein 1 OS=Saccharomyces cerevisiae (strain ATCC 204508 / S288c) OX=559292 GN=BUG1 PE=1 SV=1	Q12191	38	0	0	0	0.8818	5.8752	5.1035	4.0379	5.6008	0	0	0	0	0	0
1617	Tyrosine-protein phosphatase YVH1 OS=Saccharomyces cerevisiae (strain ATCC 204508 / S288c) OX=559292 GN=YVH1 PE=1 SV=1	Q02256	41	1.1823	0	0	0	0	0	0	0	7.5244	6.9243	8.9679	0	0	0
1618	Chitin synthase 1 OS=Saccharomyces cerevisiae (strain ATCC 204508 / S288c) OX=559292 GN=CHS1 PE=1 SV=2	P08004	130	0	0	0	0	0	0	0	1.4002	0	10.386	10.761	0	0	0
1619	Peroxisomal ATPase PEX1 OS=Saccharomyces cerevisiae (strain ATCC 204508 / S288c) OX=559292 GN=PEX1 PE=1 SV=2	P24004	117	3.5469	0	0	3.5272	2.5179	0	0.80758	2.1003	2.1498	0.86554	2.6904	1.5304	1.2645	1.2024
1620	Serine/threonine-protein kinase STE11 OS=Saccharomyces cerevisiae (strain ATCC 204508 / S288c) OX=559292 GN=STE11 PE=1 SV=3	P23561	81	1.1823	0	1.0964	1.7636	0	0.85059	0	3.5005	5.3746	1.7311	1.7936	3.0608	1.2645	3.6073
1621	Nicotinamidase OS=Saccharomyces cerevisiae (strain ATCC 204508 / S288c) OX=559292 GN=PNC1 PE=1 SV=1	P53184	25	2.3646	1.673	3.2893	2.6454	2.5179	0.85059	2.4227	2.1003	0	0	0	3.0608	3.7936	2.4049
1622	Anaphase-promoting complex subunit CDC16 OS=Saccharomyces cerevisiae (strain ATCC 204508 / S288c) OX=559292 GN=CDC16 PE=1 SV=1	P09798	95	4.7292	0	0	2.6454	2.5179	2.5518	1.6152	2.1003	1.0749	0	0.89679	1.5304	0	1.2024
1623	Heterogeneous nuclear rnp K-like protein 2 OS=Saccharomyces cerevisiae (strain ATCC 204508 / S288c) OX=559292 GN=HEK2 PE=1 SV=1	P38199	42	1.1823	0	1.0964	4.409	1.6786	0.85059	0.80758	2.1003	2.1498	0	0.89679	6.1216	0	1.2024
1624	Exosome complex protein LRP1 OS=Saccharomyces cerevisiae (strain ATCC 204508 / S288c) OX=559292 GN=LRP1 PE=1 SV=1	P38801	21	1.1823	0	1.0964	1.7636	0.83931	1.7012	3.2303	3.5005	0	0	0	1.5304	7.5872	2.4049
1625	3-methyl-2-oxobutanoate hydroxymethyltransferase OS=Saccharomyces cerevisiae (strain ATCC 204508 / S288c) OX=559292 GN=ECM31 PE=1 SV=1	P38122	34	4.7292	1.673	3.2893	1.7636	0.83931	0	0	1.4002	0	0	0	1.5304	5.0581	4.8097
1626	Hsp70 nucleotide exchange factor FES1 OS=Saccharomyces cerevisiae (strain ATCC 204508 / S288c) OX=559292 GN=FES1 PE=1 SV=1	P38260	33	1.1823	0	0	1.7636	3.3572	2.5518	1.6152	4.2006	2.1498	0	0	3.0608	2.5291	0
1627	Putative serine carboxypeptidase YBR139W OS=Saccharomyces cerevisiae (strain ATCC 204508 / S288c) OX=559292 GN=YBR139W PE=1 SV=1	P38109	58	2.3646	0	1.0964	0	4.1966	1.7012	4.0379	3.5005	0	0.86554	1.7936	0	3.7936	0
1628	Uridine kinase OS=Saccharomyces cerevisiae (strain ATCC 204508 / S288c) OX=559292 GN=URK1 PE=1 SV=1	P27515	56	2.3646	1.673	2.1929	3.5272	3.3572	4.253	2.4227	2.8004	0	0	0	1.5304	0	0
1629	U4/U6 small nuclear ribonucleoprotein PRP4 OS=Saccharomyces cerevisiae (strain ATCC 204508 / S288c) OX=559292 GN=PRP4 PE=1 SV=1	P20053	52	1.1823	0	0	1.7636	1.6786	2.5518	2.4227	1.4002	2.1498	4.3277	5.3807	0	0	0
1630	Cell division control protein 31 OS=Saccharomyces cerevisiae (strain ATCC 204508 / S288c) OX=559292 GN=CDC31 PE=1 SV=2	P06704	19	1.1823	0	0	1.7636	1.6786	1.7012	4.0379	4.9007	2.1498	3.4622	1.7936	0	0	0
1631	Atypical kinase COQ8, mitochondrial OS=Saccharomyces cerevisiae (strain ATCC 204508 / S288c) OX=559292 GN=COQ8 PE=1 SV=1	P27697	57	5.9115	1.673	1.0964	5.2908	1.6786	0	0.80758	0	0	0	0	1.5304	3.7936	1.2024
1632	37S ribosomal protein S19, mitochondrial OS=Saccharomyces cerevisiae (strain ATCC 204508 / S288c) OX=559292 GN=RSM19 PE=1 SV=1	P53733	10	4.7292	3.3461	3.2893	2.6454	0	0	0.80758	0	0	0	0.89679	1.5304	5.0581	4.8097
1633	AP-2 complex subunit mu OS=Saccharomyces cerevisiae (strain ATCC 204508 / S288c) OX=559292 GN=APM4 PE=1 SV=1	Q99186	55	2.3646	5.0191	2.1929	5.2908	0	0	0.80758	1.4002	0	0	0	1.5304	2.5291	2.4049
1634	Chromatin structure-remodeling complex protein RSC58 OS=Saccharomyces cerevisiae (strain ATCC 204508 / S288c) OX=559292 GN=RSC58 PE=1 SV=1	Q07979	58	0	0	2.1929	6.1726	0	0	0.80758	0	1.0749	3.4622	4.4839	1.5304	0	0
1635	Dihydroorotase OS=Saccharomyces cerevisiae (strain ATCC 204508 / S288c) OX=559292 GN=URA4 PE=1 SV=2	P20051	40	2.3646	3.3461	6.5786	3.5272	0	0	0	0	1.0749	0	0.89679	1.5304	6.3226	2.4049
1636	Pre-mRNA-splicing factor 6 OS=Saccharomyces cerevisiae (strain ATCC 204508 / S288c) OX=559292 GN=PRP6 PE=1 SV=1	P19735	104	0	0	1.0964	3.5272	0.83931	1.7012	0	2.1003	3.2247	3.4622	5.3807	0	0	0
1637	Guanine nucleotide exchange factor LTE1 OS=Saccharomyces cerevisiae (strain ATCC 204508 / S288c) OX=559292 GN=LTE1 PE=1 SV=2	P07866	163	0	0	1.0964	7.0544	1.6786	0.85059	0	1.4002	0	3.4622	1.7936	3.0608	0	0
1638	Mediator of replication checkpoint protein 1 OS=Saccharomyces cerevisiae (strain ATCC 204508 / S288c) OX=559292 GN=MRC1 PE=1 SV=3	P25588	124	0	0	0	0.8818	1.6786	4.253	0.80758	3.5005	2.1498	4.3277	2.6904	0	0	0
1639	Down-regulator of invasive growth 1 OS=Saccharomyces cerevisiae (strain ATCC 204508 / S288c) OX=559292 GN=DIG1 PE=1 SV=1	Q03063	49	0	1.673	3.2893	0	2.5179	2.5518	0	0	0	5.1932	1.7936	0	6.3226	4.8097
1640	Uncharacterized WD repeat-containing protein YOL087C OS=Saccharomyces cerevisiae (strain ATCC 204508 / S288c) OX=559292 GN=YOL087C PE=1 SV=1	Q99247	125	0	0	1.0964	5.2908	1.6786	3.4024	0.80758	5.6008	0	0	0.89679	0	0	0
1641	mRNA transport regulator MTR2 OS=Saccharomyces cerevisiae (strain ATCC 204508 / S288c) OX=559292 GN=MTR2 PE=1 SV=1	P34232	21	5.9115	6.6921	4.3857	1.7636	0	0	0	0	0	0	0	3.0608	3.7936	2.4049
1642	DNA-directed RNA polymerase III subunit RPC6 OS=Saccharomyces cerevisiae (strain ATCC 204508 / S288c) OX=559292 GN=RPC34 PE=1 SV=1	P32910	36	0	0	0	0	0.83931	1.7012	4.0379	2.1003	7.5244	3.4622	3.5871	0	0	0
1643	Glutathione peroxidase-like peroxiredoxin HYR1 OS=Saccharomyces cerevisiae (strain ATCC 204508 / S288c) OX=559292 GN=HYR1 PE=1 SV=1	P40581	19	4.7292	6.6921	1.0964	4.409	0	0	0	0	0	0	0	3.0608	3.7936	3.6073
1644	Serine/threonine-protein phosphatase 4 regulatory subunit 2 OS=Saccharomyces cerevisiae (strain ATCC 204508 / S288c) OX=559292 GN=PSY4 PE=1 SV=1	P38193	51	0	0	0	0	2.5179	3.4024	1.6152	3.5005	4.2997	2.5966	0.89679	0	0	0
1645	Mitochondrial homologous recombination protein 1 OS=Saccharomyces cerevisiae (strain ATCC 204508 / S288c) OX=559292 GN=MHR1 PE=1 SV=1	Q06630	27	4.7292	3.3461	3.2893	5.2908	0	0	0.80758	0	0	0	0	0	5.0581	6.0121
1646	SVF1-like protein YDR222W OS=Saccharomyces cerevisiae (strain ATCC 204508 / S288c) OX=559292 GN=YDR222W PE=1 SV=1	Q04925	47	5.9115	5.0191	1.0964	3.5272	0	0	0	0	0	0	0	4.5912	3.7936	6.0121
1647	t-SNARE VTI1 OS=Saccharomyces cerevisiae (strain ATCC 204508 / S288c) OX=559292 GN=VTI1 PE=1 SV=3	Q04338	25	0	0	0	0	2.5179	0.85059	2.4227	2.1003	3.2247	3.4622	6.2775	0	0	0
1648	Uncharacterized protein YOR352W OS=Saccharomyces cerevisiae (strain ATCC 204508 / S288c) OX=559292 GN=YOR352W PE=1 SV=1	Q08816	39	0	0	0	0	0.83931	0.85059	6.4607	4.2006	2.1498	4.3277	1.7936	0	0	0
1649	m7GpppN-mRNA hydrolase OS=Saccharomyces cerevisiae (strain ATCC 204508 / S288c) OX=559292 GN=DCP2 PE=1 SV=1	P53550	109	0	0	0	5.2908	3.3572	6.8047	0	2.8004	0	0.86554	0.89679	0	0	0
1650	Actin-related protein 5 OS=Saccharomyces cerevisiae (strain ATCC 204508 / S288c) OX=559292 GN=ARP5 PE=1 SV=1	P53946	88	0	0	0	0	1.6786	4.253	4.8455	4.2006	0	2.5966	1.7936	0	0	0
1651	Myosin light chain 2 OS=Saccharomyces cerevisiae (strain ATCC 204508 / S288c) OX=559292 GN=MLC2 PE=1 SV=1	Q06580	19	0	0	0	0	0.83931	1.7012	3.2303	4.9007	0	5.1932	5.3807	0	0	0
1652	Pyruvate dehydrogenase complex protein X component, mitochondrial OS=Saccharomyces cerevisiae (strain ATCC 204508 / S288c) OX=559292 GN=PDX1 PE=1 SV=1	P16451	45	0	0	0	0.8818	0.83931	0.85059	0	0.7001	0	6.9243	8.9679	0	0	0
1653	mRNA cleavage and polyadenylation factor CLP1 OS=Saccharomyces cerevisiae (strain ATCC 204508 / S288c) OX=559292 GN=CLP1 PE=1 SV=1	Q08685	50	0	0	0	1.7636	1.6786	2.5518	5.6531	4.2006	0	0	0	1.5304	0	0
1654	Syntaxin-8 OS=Saccharomyces cerevisiae (strain ATCC 204508 / S288c) OX=559292 GN=SYN8 PE=1 SV=2	P31377	29	0	0	0	0	4.1966	2.5518	0	2.8004	1.0749	6.0588	5.3807	0	0	0
1655	Actin cytoskeleton-regulatory complex protein PAN1 OS=Saccharomyces cerevisiae (strain ATCC 204508 / S288c) OX=559292 GN=PAN1 PE=1 SV=2	P32521	160	0	0	0	0	2.5179	0.85059	0.80758	3.5005	0	6.9243	8.0711	0	0	0
1656	Glutathione S-transferase 1 OS=Saccharomyces cerevisiae (strain ATCC 204508 / S288c) OX=559292 GN=GTT1 PE=1 SV=1	P40582	27	0	0	0	0	8.3931	5.1035	0	5.6008	1.0749	0.86554	0.89679	0	0	0
1657	Protein SKG6 OS=Saccharomyces cerevisiae (strain ATCC 204508 / S288c) OX=559292 GN=SKG6 PE=1 SV=2	P32900	82	0	0	0	0	0	0	0.80758	2.1003	2.1498	8.6554	8.0711	0	0	0
1658	Geranylgeranyl transferase type-2 subunit alpha OS=Saccharomyces cerevisiae (strain ATCC 204508 / S288c) OX=559292 GN=BET4 PE=1 SV=3	Q00618	40	0	0	1.0964	0	5.0359	3.4024	4.8455	5.6008	0	0	0	0	0	0
1659	J protein JJJ1 OS=Saccharomyces cerevisiae (strain ATCC 204508 / S288c) OX=559292 GN=JJJ1 PE=1 SV=1	P53863	69	1.1823	0	0	0	0	0	0	0	5.3746	6.0588	9.8647	0	0	0
1660	YAP1-binding protein 1 OS=Saccharomyces cerevisiae (strain ATCC 204508 / S288c) OX=559292 GN=YBP1 PE=1 SV=1	P38315	78	0	0	0	0	2.5179	4.253	4.8455	8.4012	0	0	0	0	0	0
1661	Structure-specific endonuclease subunit SLX4 OS=Saccharomyces cerevisiae (strain ATCC 204508 / S288c) OX=559292 GN=SLX4 PE=1 SV=1	Q12098	84	4.7292	15.057	0	3.5272	0	0	0	0	0	0	0	0	12.645	0
1662	Mitochondrial chaperone TCM62 OS=Saccharomyces cerevisiae (strain ATCC 204508 / S288c) OX=559292 GN=TCM62 PE=1 SV=2	P38228	64	0	0	13.157	0	0	0	0.80758	0	0	0	0	0	10.116	2.4049
1663	Glutamate decarboxylase OS=Saccharomyces cerevisiae (strain ATCC 204508 / S288c) OX=559292 GN=GAD1 PE=1 SV=1	Q04792	66	0	0	0	0	4.1966	2.5518	8.0758	5.6008	0	0	0	0	0	0
1664	60S ribosomal protein L39 OS=Saccharomyces cerevisiae (strain ATCC 204508 / S288c) OX=559292 GN=RPL39 PE=1 SV=3	P04650	6	0	0	0	0	0	0	0	0	10.749	4.3277	3.5871	0	0	0
1665	Cytoplasmic 60S subunit biogenesis factor REI1 OS=Saccharomyces cerevisiae (strain ATCC 204508 / S288c) OX=559292 GN=REI1 PE=1 SV=3	P38344	46	0	0	0	0	0	0	0	0	12.899	6.0588	7.1743	0	0	0
1666	Prohibitin-1 OS=Saccharomyces cerevisiae (strain ATCC 204508 / S288c) OX=559292 GN=PHB1 PE=1 SV=2	P40961	31	7.0938	1.673	0	3.5272	0.83931	0.85059	0	0.7001	0	0.86554	1.7936	1.5304	1.2645	2.4049
1667	DnaJ-related protein SCJ1 OS=Saccharomyces cerevisiae (strain ATCC 204508 / S288c) OX=559292 GN=SCJ1 PE=1 SV=2	P25303	42	1.1823	0	2.1929	0.8818	1.6786	0.85059	2.4227	2.8004	2.1498	1.7311	2.6904	0	0	0
1668	Ferrochelatase, mitochondrial OS=Saccharomyces cerevisiae (strain ATCC 204508 / S288c) OX=559292 GN=HEM15 PE=1 SV=1	P16622	45	5.9115	1.673	2.1929	4.409	1.6786	2.5518	0.80758	3.5005	0	0	0	0	1.2645	0
1669	Endopolyphosphatase OS=Saccharomyces cerevisiae (strain ATCC 204508 / S288c) OX=559292 GN=PPN1 PE=1 SV=1	Q04119	78	0	0	2.1929	0.8818	0	0	0.80758	0.7001	0	0.86554	0.89679	1.5304	10.116	7.2146
1670	Aminopeptidase Y OS=Saccharomyces cerevisiae (strain ATCC 204508 / S288c) OX=559292 GN=APE3 PE=1 SV=1	P37302	60	3.5469	5.0191	5.4822	5.2908	0.83931	0	0	0.7001	0	0	0	1.5304	1.2645	2.4049
1671	Ribosome biogenesis protein RPF2 OS=Saccharomyces cerevisiae (strain ATCC 204508 / S288c) OX=559292 GN=RPF2 PE=1 SV=1	P36160	40	0	0	1.0964	0.8818	0.83931	0.85059	1.6152	0.7001	17.199	0.86554	0	0	0	1.2024
1672	Mediator of RNA polymerase II transcription subunit 14 OS=Saccharomyces cerevisiae (strain ATCC 204508 / S288c) OX=559292 GN=RGR1 PE=1 SV=2	P19263	123	0	0	0	4.409	0.83931	0.85059	3.2303	4.2006	1.0749	1.7311	0.89679	0	0	0
1673	Importin subunit beta-5 OS=Saccharomyces cerevisiae (strain ATCC 204508 / S288c) OX=559292 GN=KAP114 PE=1 SV=1	P53067	114	0	0	4.3857	1.7636	1.6786	2.5518	2.4227	2.1003	1.0749	0	0	7.652	0	0
1674	Uridylate kinase OS=Saccharomyces cerevisiae (strain ATCC 204508 / S288c) OX=559292 GN=URA6 PE=1 SV=1	P15700	23	4.7292	5.0191	8.7714	3.5272	0	0	0	0.7001	0	0	0	1.5304	1.2645	1.2024
1675	Nucleolar pre-ribosomal-associated protein 2 OS=Saccharomyces cerevisiae (strain ATCC 204508 / S288c) OX=559292 GN=URB2 PE=1 SV=1	P47108	135	0	0	0	0	0	0.85059	1.6152	0.7001	7.5244	2.5966	3.5871	0	1.2645	2.4049
1676	Structural maintenance of chromosomes protein 5 OS=Saccharomyces cerevisiae (strain ATCC 204508 / S288c) OX=559292 GN=SMC5 PE=1 SV=1	Q08204	126	1.1823	3.3461	3.2893	2.6454	0.83931	0	0	0	0	0	0	0	3.7936	3.6073
1677	Poly(A) ribonuclease POP2 OS=Saccharomyces cerevisiae (strain ATCC 204508 / S288c) OX=559292 GN=POP2 PE=1 SV=2	P39008	50	0	0	0	7.9362	0.83931	2.5518	0	2.1003	0	2.5966	1.7936	3.0608	0	0
1678	Vesicle-associated membrane protein-associated protein SCS2 OS=Saccharomyces cerevisiae (strain ATCC 204508 / S288c) OX=559292 GN=SCS2 PE=1 SV=3	P40075	27	1.1823	0	0	0	3.3572	0.85059	2.4227	4.2006	0	3.4622	5.3807	0	0	0
1679	Protein arginine N-methyltransferase SFM1 OS=Saccharomyces cerevisiae (strain ATCC 204508 / S288c) OX=559292 GN=SFM1 PE=1 SV=1	Q12314	25	2.3646	0	3.2893	1.7636	0.83931	0	0	3.5005	0	0	0	7.652	0	0
1680	Putative reductase 1 OS=Saccharomyces cerevisiae (strain ATCC 204508 / S288c) OX=559292 GN=YPR1 PE=1 SV=1	Q12458	35	2.3646	3.3461	6.5786	3.5272	0	0	0	0	0	0	0	1.5304	3.7936	4.8097
1681	tRNA-dihydrouridine(47) synthase [NAD(P)(+)] OS=Saccharomyces cerevisiae (strain ATCC 204508 / S288c) OX=559292 GN=DUS3 PE=1 SV=2	Q06053	77	0	0	0	0	2.5179	0.85059	4.0379	7.001	1.0749	2.5966	1.7936	0	0	0
1682	Ubiquitin carboxyl-terminal hydrolase 4 OS=Saccharomyces cerevisiae (strain ATCC 204508 / S288c) OX=559292 GN=DOA4 PE=1 SV=2	P32571	105	2.3646	0	0	14.991	0.83931	0.85059	0	0	0	0	0	1.5304	1.2645	1.2024
1683	Proteasome assembly chaperone 2 OS=Saccharomyces cerevisiae (strain ATCC 204508 / S288c) OX=559292 GN=ADD66 PE=1 SV=1	P36040	31	0	0	0	0	4.1966	3.4024	5.6531	2.8004	0	1.7311	0.89679	1.5304	0	0
1684	Mevalonate kinase OS=Saccharomyces cerevisiae (strain ATCC 204508 / S288c) OX=559292 GN=ERG12 PE=1 SV=1	P07277	48	0	0	0	0.8818	5.8752	1.7012	3.2303	6.3009	0	0.86554	0	0	0	0
1685	Transcriptional regulator URE2 OS=Saccharomyces cerevisiae (strain ATCC 204508 / S288c) OX=559292 GN=URE2 PE=1 SV=1	P23202	40	0	0	2.1929	0.8818	2.5179	4.253	5.6531	2.8004	0	0	0	0	0	0
1686	Protein WHI4 OS=Saccharomyces cerevisiae (strain ATCC 204508 / S288c) OX=559292 GN=WHI4 PE=1 SV=1	Q07655	71	2.3646	0	0	10.582	0	0	0	0.7001	0	4.3277	3.5871	0	0	2.4049
1687	Histone acetyltransferase type B subunit 2 OS=Saccharomyces cerevisiae (strain ATCC 204508 / S288c) OX=559292 GN=HAT2 PE=1 SV=1	P39984	45	0	0	0	0	0	4.253	0.80758	2.8004	2.1498	6.9243	4.4839	0	0	0
1688	Protein FYV6 OS=Saccharomyces cerevisiae (strain ATCC 204508 / S288c) OX=559292 GN=FYV6 PE=1 SV=1	P53913	20	3.5469	5.0191	0	3.5272	0	0	0	0	0	0	0	4.5912	1.2645	4.8097
1689	Arrestin-related trafficking adapter 10 OS=Saccharomyces cerevisiae (strain ATCC 204508 / S288c) OX=559292 GN=ART10 PE=1 SV=3	P18634	60	1.1823	0	1.0964	3.5272	0	0	0	0	0	0	0	0	7.5872	10.822
1690	E3 ubiquitin-protein ligase HEL2 OS=Saccharomyces cerevisiae (strain ATCC 204508 / S288c) OX=559292 GN=HEL2 PE=1 SV=1	Q05580	73	0	0	0	3.5272	0	0	0	0	0	0	0	1.5304	8.8517	8.417
1691	Phospholipid-transporting ATPase DNF2 OS=Saccharomyces cerevisiae (strain ATCC 204508 / S288c) OX=559292 GN=DNF2 PE=1 SV=1	Q12675	183	0	0	0	0	3.3572	1.7012	0	4.9007	0	4.3277	5.3807	0	0	0
1692	Repressible acid phosphatase OS=Saccharomyces cerevisiae (strain ATCC 204508 / S288c) OX=559292 GN=PHO5 PE=1 SV=2	P00635	53	0	0	2.1929	0	0	0.85059	2.4227	2.1003	0	1.7311	1.7936	0	0	0
1693	Stress response protein NST1 OS=Saccharomyces cerevisiae (strain ATCC 204508 / S288c) OX=559292 GN=NST1 PE=1 SV=1	P53935	142	0	0	0	0	0	0	0	0	5.3746	8.6554	4.4839	0	5.0581	0
1694	Vacuolar membrane-associated protein IML1 OS=Saccharomyces cerevisiae (strain ATCC 204508 / S288c) OX=559292 GN=IML1 PE=1 SV=1	P47170	182	1.1823	0	1.0964	0.8818	0.83931	0.85059	0.80758	0.7001	1.0749	1.7311	2.6904	1.5304	1.2645	6.0121
1695	SWI/SNF chromatin-remodeling complex subunit SNF5 OS=Saccharomyces cerevisiae (strain ATCC 204508 / S288c) OX=559292 GN=SNF5 PE=1 SV=3	P18480	103	1.1823	0	1.0964	1.7636	2.5179	1.7012	1.6152	2.8004	1.0749	1.7311	1.7936	0	2.5291	1.2024
1696	Sister chromatid cohesion protein DCC1 OS=Saccharomyces cerevisiae (strain ATCC 204508 / S288c) OX=559292 GN=DCC1 PE=1 SV=2	P25559	44	0	1.673	0	0	1.6786	1.7012	0.80758	1.4002	2.1498	0.86554	1.7936	1.5304	7.5872	3.6073
1697	Target of rapamycin complex 1 subunit KOG1 OS=Saccharomyces cerevisiae (strain ATCC 204508 / S288c) OX=559292 GN=KOG1 PE=1 SV=2	P38873	178	1.1823	0	1.0964	3.5272	1.6786	0.85059	0.80758	3.5005	0	1.7311	0.89679	0	1.2645	0
1698	U4/U6 small nuclear ribonucleoprotein PRP3 OS=Saccharomyces cerevisiae (strain ATCC 204508 / S288c) OX=559292 GN=PRP3 PE=1 SV=1	Q03338	56	0	0	0	0.8818	1.6786	1.7012	1.6152	1.4002	3.2247	4.3277	3.5871	1.5304	1.2645	0
1699	Antiviral helicase SLH1 OS=Saccharomyces cerevisiae (strain ATCC 204508 / S288c) OX=559292 GN=SLH1 PE=1 SV=2	P53327	225	0	0	1.0964	0.8818	0	0.85059	1.6152	0	2.1498	3.4622	2.6904	0	1.2645	2.4049
1700	Structural maintenance of chromosomes protein 6 OS=Saccharomyces cerevisiae (strain ATCC 204508 / S288c) OX=559292 GN=SMC6 PE=1 SV=1	Q12749	128	0	6.6921	3.2893	0.8818	0	0.85059	2.4227	1.4002	0	0	0	1.5304	5.0581	1.2024
1701	Proline-rich protein HUA1 OS=Saccharomyces cerevisiae (strain ATCC 204508 / S288c) OX=559292 GN=HUA1 PE=1 SV=2	P40325	22	4.7292	3.3461	4.3857	1.7636	0	0	0	0	0	0.86554	0.89679	1.5304	2.5291	2.4049
1702	Protein ECM21 OS=Saccharomyces cerevisiae (strain ATCC 204508 / S288c) OX=559292 GN=ECM21 PE=1 SV=2	P38167	124	0	0	0	2.6454	0.83931	2.5518	2.4227	4.2006	1.0749	3.4622	0.89679	0	0	0
1703	Methylenetetrahydrofolate dehydrogenase [NAD(+)] OS=Saccharomyces cerevisiae (strain ATCC 204508 / S288c) OX=559292 GN=MTD1 PE=1 SV=1	Q02046	36	1.1823	1.673	6.5786	3.5272	0	0	0	0	0	0.86554	1.7936	0	6.3226	4.8097
1704	DASH complex subunit DAM1 OS=Saccharomyces cerevisiae (strain ATCC 204508 / S288c) OX=559292 GN=DAM1 PE=1 SV=2	P53267	38	0	0	0	1.7636	0	0.85059	0	0	2.1498	6.9243	7.1743	0	1.2645	1.2024
1705	Bud site selection protein 20 OS=Saccharomyces cerevisiae (strain ATCC 204508 / S288c) OX=559292 GN=BUD20 PE=1 SV=1	Q08004	19	2.3646	1.673	0	0	0	0	0	0	0	1.7311	7.1743	1.5304	5.0581	2.4049
1706	Endosomal protein P24B OS=Saccharomyces cerevisiae (strain ATCC 204508 / S288c) OX=559292 GN=EMP24 PE=1 SV=1	P32803	23	0	0	0	0	3.3572	3.4024	2.4227	3.5005	1.0749	2.5966	3.5871	0	0	0
1707	High osmolarity signaling protein SHO1 OS=Saccharomyces cerevisiae (strain ATCC 204508 / S288c) OX=559292 GN=SHO1 PE=1 SV=1	P40073	41	0	0	0	0	0.83931	1.7012	0.80758	2.8004	1.0749	5.1932	8.0711	0	0	0
1708	FAD-linked sulfhydryl oxidase ERV2 OS=Saccharomyces cerevisiae (strain ATCC 204508 / S288c) OX=559292 GN=ERV2 PE=1 SV=1	Q12284	22	0	0	0	0	3.3572	2.5518	0.80758	4.9007	0	2.5966	2.6904	0	0	0
1709	Transcription initiation factor TFIID subunit 8 OS=Saccharomyces cerevisiae (strain ATCC 204508 / S288c) OX=559292 GN=TAF8 PE=1 SV=1	Q03750	58	0	0	0	0.8818	0	0	1.6152	1.4002	8.5993	5.1932	3.5871	0	0	0
1710	Cohesin subunit SCC3 OS=Saccharomyces cerevisiae (strain ATCC 204508 / S288c) OX=559292 GN=IRR1 PE=1 SV=1	P40541	133	0	0	0	0	0	3.4024	6.4607	4.2006	2.1498	1.7311	0.89679	0	0	0
1711	Protein N-terminal and lysine N-methyltransferase EFM7 OS=Saccharomyces cerevisiae (strain ATCC 204508 / S288c) OX=559292 GN=NNT1 PE=1 SV=1	Q05874	30	1.1823	0	4.3857	0	4.1966	4.253	4.0379	3.5005	0	0	0	0	0	0
1712	Polyphosphatidylinositol phosphatase INP53 OS=Saccharomyces cerevisiae (strain ATCC 204508 / S288c) OX=559292 GN=INP53 PE=1 SV=1	Q12271	125	2.3646	0	0	0.8818	2.5179	1.7012	2.4227	4.9007	0	0	0	0	0	0
1713	ADP-ribosylation factor 3 OS=Saccharomyces cerevisiae (strain ATCC 204508 / S288c) OX=559292 GN=ARF3 PE=1 SV=2	P40994	21	4.7292	3.3461	0	1.7636	0	0	0	0	0	0	0	0	5.0581	6.0121
1714	Mitochondrial import inner membrane translocase subunit TIM44 OS=Saccharomyces cerevisiae (strain ATCC 204508 / S288c) OX=559292 GN=TIM44 PE=1 SV=1	Q01852	49	10.641	6.6921	0	1.7636	0	0	0	0.7001	0	0	0	1.5304	5.0581	0
1715	54S ribosomal protein L8, mitochondrial OS=Saccharomyces cerevisiae (strain ATCC 204508 / S288c) OX=559292 GN=MRPL8 PE=1 SV=4	P22353	27	7.0938	6.6921	0	5.2908	0	0	0	0	0	0	0	0	3.7936	1.2024
1716	Casein kinase I homolog 1 OS=Saccharomyces cerevisiae (strain ATCC 204508 / S288c) OX=559292 GN=YCK1 PE=1 SV=1	P23291	62	0	0	5.4822	3.5272	0	0	0	0	0	0	0	3.0608	7.5872	4.8097
1717	DNA damage tolerance protein RHC31 OS=Saccharomyces cerevisiae (strain ATCC 204508 / S288c) OX=559292 GN=AOS1 PE=1 SV=1	Q06624	39	0	0	0	0.8818	3.3572	4.253	5.6531	3.5005	0	0	0	0	0	0
1718	Protein PSP2 OS=Saccharomyces cerevisiae (strain ATCC 204508 / S288c) OX=559292 GN=PSP2 PE=1 SV=2	P50109	66	0	0	0	11.463	0	0	0	0	0	0.86554	0	0	2.5291	2.4049
1719	Syntaxin PEP12 OS=Saccharomyces cerevisiae (strain ATCC 204508 / S288c) OX=559292 GN=PEP12 PE=1 SV=2	P32854	33	0	0	0	0	0	0	0	0.7001	1.0749	8.6554	9.8647	0	0	0
1720	Importin beta-like protein KAP120 OS=Saccharomyces cerevisiae (strain ATCC 204508 / S288c) OX=559292 GN=KAP120 PE=1 SV=1	Q02932	120	0	0	0	0	5.0359	4.253	6.4607	1.4002	0	0	0	0	0	0
1721	Inactive deaminase YJL070C OS=Saccharomyces cerevisiae (strain ATCC 204508 / S288c) OX=559292 GN=YJL070C PE=1 SV=1	P40361	104	0	0	0	0	4.1966	4.253	4.0379	6.3009	0	0	0	0	0	0
1722	Protein arginine N-methyltransferase 1 OS=Saccharomyces cerevisiae (strain ATCC 204508 / S288c) OX=559292 GN=HMT1 PE=1 SV=1	P38074	40	0	0	0	0	3.3572	6.8047	5.6531	4.2006	0	0	0	0	0	0
1723	Chromosome transmission fidelity protein 18 OS=Saccharomyces cerevisiae (strain ATCC 204508 / S288c) OX=559292 GN=CTF18 PE=1 SV=1	P49956	84	0	0	0	0.8818	0	0	0.80758	0	0	0	0	0	17.703	7.2146
1724	60S acidic ribosomal protein P1-beta OS=Saccharomyces cerevisiae (strain ATCC 204508 / S288c) OX=559292 GN=RPP1B PE=1 SV=3	P10622	11	1.1823	1.673	2.1929	1.7636	0.83931	0.85059	1.6152	1.4002	5.3746	1.7311	2.6904	0	1.2645	1.2024
1725	Phosphorelay intermediate protein YPD1 OS=Saccharomyces cerevisiae (strain ATCC 204508 / S288c) OX=559292 GN=YPD1 PE=1 SV=1	Q07688	19	2.3646	1.673	2.1929	0.8818	3.3572	1.7012	1.6152	4.2006	0	0.86554	0	1.5304	0	1.2024
1726	N-alpha-acetyltransferase NAT5 OS=Saccharomyces cerevisiae (strain ATCC 204508 / S288c) OX=559292 GN=NAT5 PE=1 SV=1	Q08689	20	2.3646	5.0191	2.1929	2.6454	0	0	0.80758	0	3.2247	1.7311	0.89679	0	3.7936	4.8097
1727	Sterol esterase TGL1 OS=Saccharomyces cerevisiae (strain ATCC 204508 / S288c) OX=559292 GN=TGL1 PE=1 SV=1	P34163	63	0	1.673	0	11.463	0	0	0.80758	0	1.0749	1.7311	0.89679	3.0608	1.2645	1.2024
1728	5-oxoprolinase OS=Saccharomyces cerevisiae (strain ATCC 204508 / S288c) OX=559292 GN=OXP1 PE=1 SV=2	P28273	140	2.3646	1.673	7.675	3.5272	0.83931	0	0	0	0	0	0.89679	1.5304	1.2645	1.2024
1729	DNA polymerase epsilon subunit B OS=Saccharomyces cerevisiae (strain ATCC 204508 / S288c) OX=559292 GN=DPB2 PE=1 SV=3	P24482	78	0	0	0	0.8818	0.83931	1.7012	1.6152	2.8004	1.0749	3.4622	4.4839	0	0	0
1730	Transcriptional regulatory protein DEP1 OS=Saccharomyces cerevisiae (strain ATCC 204508 / S288c) OX=559292 GN=DEP1 PE=1 SV=3	P31385	47	0	0	0	0	0.83931	1.7012	2.4227	2.1003	2.1498	4.3277	6.2775	0	0	0
1731	Uncharacterized protein YBL010C OS=Saccharomyces cerevisiae (strain ATCC 204508 / S288c) OX=559292 GN=YBL010C PE=1 SV=1	P32788	33	0	0	0	0	0.83931	3.4024	3.2303	2.8004	3.2247	4.3277	2.6904	0	0	0
1732	Arf guanine nucleotide exchange factor SYT1 OS=Saccharomyces cerevisiae (strain ATCC 204508 / S288c) OX=559292 GN=SYT1 PE=1 SV=1	Q06836	138	0	0	0	6.1726	0	0.85059	0	0.7001	0	1.7311	1.7936	0	0	4.8097
1733	Glucose-6-phosphate 1-epimerase OS=Saccharomyces cerevisiae (strain ATCC 204508 / S288c) OX=559292 GN=YMR099C PE=1 SV=1	Q03161	34	1.1823	3.3461	6.5786	4.409	0	0	0	0.7001	0	0	0	0	5.0581	1.2024
1734	Type 1 phosphatases regulator YPI1 OS=Saccharomyces cerevisiae (strain ATCC 204508 / S288c) OX=559292 GN=YPI1 PE=1 SV=1	P43587	18	0	0	0	0	1.6786	3.4024	0.80758	2.1003	2.1498	5.1932	4.4839	0	0	0
1735	Inner kinetochore subunit MCM21 OS=Saccharomyces cerevisiae (strain ATCC 204508 / S288c) OX=559292 GN=MCM21 PE=1 SV=2	Q06675	43	2.3646	1.673	7.675	2.6454	0	0	0	0.7001	0	0	0	0	3.7936	1.2024
1736	Inositol hexakisphosphate kinase 1 OS=Saccharomyces cerevisiae (strain ATCC 204508 / S288c) OX=559292 GN=KCS1 PE=1 SV=1	Q12494	120	0	0	0	0	5.0359	2.5518	2.4227	4.9007	0	1.7311	0.89679	0	0	0
1737	Silent chromatin protein ESC1 OS=Saccharomyces cerevisiae (strain ATCC 204508 / S288c) OX=559292 GN=ESC1 PE=1 SV=1	Q03661	187	0	0	0	0	1.6786	1.7012	1.6152	0	3.2247	6.9243	4.4839	0	0	0
1738	Myosin-1 OS=Saccharomyces cerevisiae (strain ATCC 204508 / S288c) OX=559292 GN=MYO1 PE=1 SV=3	P08964	224	0	0	0	0	1.6786	0.85059	1.6152	5.6008	0	1.7311	2.6904	0	0	0
1739	Probable metalloprotease ARX1 OS=Saccharomyces cerevisiae (strain ATCC 204508 / S288c) OX=559292 GN=ARX1 PE=1 SV=1	Q03862	65	3.5469	0	3.2893	3.5272	0	0	0	0	0	0	0	1.5304	8.8517	3.6073
1740	Small nuclear ribonucleoprotein-associated protein B OS=Saccharomyces cerevisiae (strain ATCC 204508 / S288c) OX=559292 GN=SMB1 PE=1 SV=1	P40018	22	0	0	0	0	0	1.7012	2.4227	1.4002	3.2247	6.9243	5.3807	0	0	0
1741	Clathrin coat assembly protein AP180B OS=Saccharomyces cerevisiae (strain ATCC 204508 / S288c) OX=559292 GN=YAP1802 PE=1 SV=1	P53309	64	1.1823	0	8.7714	3.5272	0	0	0	0	0	0	0	1.5304	3.7936	2.4049
1742	RNA polymerase II subunit B1 CTD phosphatase RTR1 OS=Saccharomyces cerevisiae (strain ATCC 204508 / S288c) OX=559292 GN=RTR1 PE=1 SV=1	P40084	26	0	0	0	0	2.5179	1.7012	5.6531	4.9007	1.0749	0	0.89679	0	0	0
1743	Protein farnesyltransferase/geranylgeranyltransferase type-1 subunit alpha OS=Saccharomyces cerevisiae (strain ATCC 204508 / S288c) OX=559292 GN=RAM2 PE=1 SV=1	P29703	38	0	0	0	0	1.6786	3.4024	6.4607	4.9007	0	0	0	1.5304	0	0
1744	Serine/threonine-protein phosphatase 2B catalytic subunit A2 OS=Saccharomyces cerevisiae (strain ATCC 204508 / S288c) OX=559292 GN=CMP2 PE=1 SV=2	P14747	69	0	0	0	0	5.0359	0.85059	4.0379	5.6008	0	0	0	0	0	0
1745	Oxysterol-binding protein homolog 3 OS=Saccharomyces cerevisiae (strain ATCC 204508 / S288c) OX=559292 GN=OSH3 PE=1 SV=1	P38713	114	0	0	0	0	0	0	0	0	3.2247	6.9243	0	0	7.5872	2.4049
1746	SNF1 protein kinase subunit beta-2 OS=Saccharomyces cerevisiae (strain ATCC 204508 / S288c) OX=559292 GN=SIP2 PE=1 SV=3	P34164	46	0	0	0	0	0.83931	0	0	4.2006	4.2997	2.5966	3.5871	0	0	0
1747	Assembly-complementing factor 4 OS=Saccharomyces cerevisiae (strain ATCC 204508 / S288c) OX=559292 GN=ACF4 PE=1 SV=1	P47129	36	0	0	0	0	0	1.7012	0	0	2.1498	8.6554	8.0711	0	0	0
1748	Protein GLC8 OS=Saccharomyces cerevisiae (strain ATCC 204508 / S288c) OX=559292 GN=GLC8 PE=1 SV=1	P41818	27	0	0	0	0	4.1966	5.1035	3.2303	5.6008	0	0	0	0	0	0
1749	Porphobilinogen deaminase OS=Saccharomyces cerevisiae (strain ATCC 204508 / S288c) OX=559292 GN=HEM3 PE=1 SV=1	P28789	37	0	0	0	0	4.1966	3.4024	4.8455	4.9007	0	0	0	0	0	0
1750	Probable DNA-binding protein SNT1 OS=Saccharomyces cerevisiae (strain ATCC 204508 / S288c) OX=559292 GN=SNT1 PE=1 SV=2	P25357	138	0	0	0	0	0	0	0.80758	0	2.1498	10.386	7.1743	0	0	0
1751	Pheromone alpha factor receptor OS=Saccharomyces cerevisiae (strain ATCC 204508 / S288c) OX=559292 GN=STE2 PE=1 SV=2	D6VTK4	48	0	0	0	0	0.83931	0	0	2.1003	0	6.9243	8.0711	0	0	0
1752	Nucleolar protein 12 OS=Saccharomyces cerevisiae (strain ATCC 204508 / S288c) OX=559292 GN=NOP12 PE=1 SV=1	Q08208	52	0	0	0	0	0	0	0	0	3.2247	8.6554	8.0711	0	0	0
1753	Pre-mRNA-processing ATP-dependent RNA helicase PRP5 OS=Saccharomyces cerevisiae (strain ATCC 204508 / S288c) OX=559292 GN=PRP5 PE=1 SV=1	P21372	96	0	0	1.0964	0.8818	0.83931	0.85059	0	0.7001	0	0.86554	0	3.0608	5.0581	2.4049
1754	Tubulin-specific chaperone A OS=Saccharomyces cerevisiae (strain ATCC 204508 / S288c) OX=559292 GN=RBL2 PE=1 SV=1	P48606	12	2.3646	0	4.3857	3.5272	0	0.85059	0	1.4002	0	2.5966	1.7936	0	1.2645	1.2024
1755	Transcription factor tau 95 subunit OS=Saccharomyces cerevisiae (strain ATCC 204508 / S288c) OX=559292 GN=TFC1 PE=1 SV=1	P32367	74	0	0	0	1.7636	2.5179	2.5518	4.0379	3.5005	1.0749	1.7311	0.89679	1.5304	0	0
1756	Protein HMF1 OS=Saccharomyces cerevisiae (strain ATCC 204508 / S288c) OX=559292 GN=HMF1 PE=1 SV=1	P40037	14	2.3646	3.3461	4.3857	4.409	0	0	0.80758	0.7001	0	0	0	1.5304	3.7936	3.6073
1757	Serine/threonine-protein kinase HAL5 OS=Saccharomyces cerevisiae (strain ATCC 204508 / S288c) OX=559292 GN=HAL5 PE=1 SV=2	P38970	95	2.3646	0	1.0964	5.2908	0.83931	0	0	0	0	0	0.89679	4.5912	1.2645	2.4049
1758	DNA repair protein RAD2 OS=Saccharomyces cerevisiae (strain ATCC 204508 / S288c) OX=559292 GN=RAD2 PE=1 SV=2	P07276	118	0	0	0	5.2908	1.6786	0.85059	0	2.8004	2.1498	0.86554	2.6904	0	0	0
1759	Phosphatidic acid phosphohydrolase 1 OS=Saccharomyces cerevisiae (strain ATCC 204508 / S288c) OX=559292 GN=PAH1 PE=1 SV=1	P32567	95	0	0	0	0	1.6786	3.4024	0.80758	3.5005	0	1.7311	1.7936	0	0	0
1760	Dynein heavy chain, cytoplasmic OS=Saccharomyces cerevisiae (strain ATCC 204508 / S288c) OX=559292 GN=DYN1 PE=1 SV=1	P36022	471	2.3646	0	1.0964	7.9362	0	0	0	0.7001	0	0	0.89679	0	0	2.4049
1761	tRNA 2'-phosphotransferase OS=Saccharomyces cerevisiae (strain ATCC 204508 / S288c) OX=559292 GN=TPT1 PE=1 SV=1	Q12272	26	3.5469	3.3461	5.4822	2.6454	0	0	0	0	0	0	0	3.0608	1.2645	4.8097
1762	Exosome complex component RRP40 OS=Saccharomyces cerevisiae (strain ATCC 204508 / S288c) OX=559292 GN=RRP40 PE=1 SV=2	Q08285	27	0	1.673	0	0	2.5179	2.5518	5.6531	2.8004	1.0749	0.86554	0	0	0	0
1763	Mitochondrial transcription factor 1 OS=Saccharomyces cerevisiae (strain ATCC 204508 / S288c) OX=559292 GN=MTF1 PE=1 SV=4	P14908	40	2.3646	1.673	3.2893	3.5272	0	0	0	0	0	0	0	3.0608	5.0581	3.6073
1764	Protein ATP12, mitochondrial OS=Saccharomyces cerevisiae (strain ATCC 204508 / S288c) OX=559292 GN=ATP12 PE=1 SV=2	P22135	37	5.9115	1.673	2.1929	5.2908	0	0	0	0	0	0	0	1.5304	1.2645	2.4049
1765	GTPase-activating protein GYP7 OS=Saccharomyces cerevisiae (strain ATCC 204508 / S288c) OX=559292 GN=GYP7 PE=1 SV=1	P48365	87	2.3646	0	0	0	2.5179	3.4024	4.0379	3.5005	0	0.86554	0.89679	0	0	0
1766	NADPH-dependent alpha-keto amide reductase OS=Saccharomyces cerevisiae (strain ATCC 204508 / S288c) OX=559292 GN=YDL124W PE=1 SV=1	Q07551	36	0	0	8.7714	4.409	0	0	0	0	0	0.86554	0.89679	0	1.2645	4.8097
1767	Succinate--CoA ligase [ADP-forming] subunit beta, mitochondrial OS=Saccharomyces cerevisiae (strain ATCC 204508 / S288c) OX=559292 GN=LSC2 PE=1 SV=1	P53312	47	4.7292	3.3461	3.2893	3.5272	0	0	0	0	0	0	0	0	3.7936	0
1768	Pro-apoptotic serine protease NMA111 OS=Saccharomyces cerevisiae (strain ATCC 204508 / S288c) OX=559292 GN=NMA111 PE=1 SV=1	P53920	111	0	0	1.0964	0	5.8752	3.4024	0.80758	4.9007	0	0	0	0	0	0
1769	Squalene monooxygenase OS=Saccharomyces cerevisiae (strain ATCC 204508 / S288c) OX=559292 GN=ERG1 PE=1 SV=2	P32476	55	0	0	0	2.6454	0	0	5.6531	1.4002	0	0	1.7936	0	0	0
1770	Sodium transport ATPase 5 OS=Saccharomyces cerevisiae (strain ATCC 204508 / S288c) OX=559292 GN=ENA5 PE=1 SV=1	Q12691	120	0	0	0	0	0.83931	0	1.6152	4.9007	0	3.4622	4.4839	0	0	0
1771	t-SNARE affecting a late Golgi compartment protein 2 OS=Saccharomyces cerevisiae (strain ATCC 204508 / S288c) OX=559292 GN=TLG2 PE=1 SV=1	Q08144	46	0	0	0	0	2.5179	0.85059	0	1.4002	0	6.0588	6.2775	0	0	0
1772	mRNA 3'-end-processing protein RNA15 OS=Saccharomyces cerevisiae (strain ATCC 204508 / S288c) OX=559292 GN=RNA15 PE=1 SV=1	P25299	33	0	0	0	0	2.5179	3.4024	3.2303	3.5005	0	0	0	0	0	0
1773	Nonsense-mediated mRNA decay protein 3 OS=Saccharomyces cerevisiae (strain ATCC 204508 / S288c) OX=559292 GN=UPF3 PE=1 SV=1	P48412	45	0	0	0	0	0	0	0	0	5.3746	6.9243	7.1743	0	0	0
1774	Transcriptional regulatory protein SAP30 OS=Saccharomyces cerevisiae (strain ATCC 204508 / S288c) OX=559292 GN=SAP30 PE=1 SV=2	P38429	23	0	1.673	1.0964	1.7636	1.6786	1.7012	1.6152	1.4002	3.2247	0.86554	2.6904	0	1.2645	0
1775	Small nuclear ribonucleoprotein Sm D2 OS=Saccharomyces cerevisiae (strain ATCC 204508 / S288c) OX=559292 GN=SMD2 PE=1 SV=2	Q06217	13	1.1823	1.673	1.0964	0	1.6786	1.7012	1.6152	0.7001	3.2247	2.5966	3.5871	0	1.2645	0
1776	Glutathione-specific gamma-glutamylcyclotransferase OS=Saccharomyces cerevisiae (strain ATCC 204508 / S288c) OX=559292 GN=GCG1 PE=1 SV=1	P32656	26	4.7292	1.673	3.2893	1.7636	0.83931	0.85059	0.80758	0.7001	0	0	0	1.5304	2.5291	3.6073
1777	Kinesin-like protein KAR3 OS=Saccharomyces cerevisiae (strain ATCC 204508 / S288c) OX=559292 GN=KAR3 PE=1 SV=1	P17119	84	3.5469	1.673	3.2893	3.5272	0	0	0.80758	0.7001	0	0.86554	0.89679	1.5304	2.5291	1.2024
1778	DNA-directed RNA polymerase I subunit RPA14 OS=Saccharomyces cerevisiae (strain ATCC 204508 / S288c) OX=559292 GN=RPA14 PE=1 SV=1	P50106	15	1.1823	0	0	0	0.83931	0.85059	0.80758	0.7001	5.3746	3.4622	2.6904	0	2.5291	2.4049
1779	ATP-dependent permease PDR12 OS=Saccharomyces cerevisiae (strain ATCC 204508 / S288c) OX=559292 GN=PDR12 PE=1 SV=1	Q02785	171	1.1823	0	1.0964	5.2908	0.83931	0.85059	2.4227	1.4002	0	1.7311	0.89679	0	0	0
1780	Probable kynurenine--oxoglutarate transaminase BNA3 OS=Saccharomyces cerevisiae (strain ATCC 204508 / S288c) OX=559292 GN=BNA3 PE=1 SV=1	P47039	50	3.5469	0	4.3857	2.6454	0	0	1.6152	1.4002	1.0749	0	0	3.0608	1.2645	1.2024
1781	Sedoheptulose 1,7-bisphosphatase OS=Saccharomyces cerevisiae (strain ATCC 204508 / S288c) OX=559292 GN=SHB17 PE=1 SV=1	P36136	31	1.1823	3.3461	3.2893	0.8818	0	0	0.80758	3.5005	0	0	0	3.0608	5.0581	3.6073
1782	Ribosome biogenesis protein 15 OS=Saccharomyces cerevisiae (strain ATCC 204508 / S288c) OX=559292 GN=NOP15 PE=1 SV=1	P53927	25	2.3646	0	3.2893	1.7636	0	0	0	0	4.2997	3.4622	2.6904	1.5304	1.2645	0
1783	Phosphatidylinositol 4,5-bisphosphate-binding protein SLM2 OS=Saccharomyces cerevisiae (strain ATCC 204508 / S288c) OX=559292 GN=SLM2 PE=1 SV=1	P53955	75	2.3646	3.3461	2.1929	2.6454	0	0	0	0	0	0	0.89679	1.5304	6.3226	6.0121
1784	COMPASS component SDC1 OS=Saccharomyces cerevisiae (strain ATCC 204508 / S288c) OX=559292 GN=SDC1 PE=1 SV=1	Q03323	19	0	0	1.0964	0	1.6786	0	0.80758	2.1003	3.2247	5.1932	3.5871	0	1.2645	0
1785	Mediator of RNA polymerase II transcription subunit 16 OS=Saccharomyces cerevisiae (strain ATCC 204508 / S288c) OX=559292 GN=SIN4 PE=1 SV=1	P32259	111	2.3646	0	0	3.5272	0	0	3.2303	4.2006	0	0.86554	0.89679	0	0	1.2024
1786	Histone-lysine N-methyltransferase, H3 lysine-4 specific OS=Saccharomyces cerevisiae (strain ATCC 204508 / S288c) OX=559292 GN=SET1 PE=1 SV=1	P38827	124	0	0	4.3857	0.8818	0.83931	0.85059	0.80758	0	4.2997	5.1932	2.6904	0	0	0
1787	54S ribosomal protein L6, mitochondrial OS=Saccharomyces cerevisiae (strain ATCC 204508 / S288c) OX=559292 GN=MRPL6 PE=1 SV=2	P32904	24	3.5469	1.673	2.1929	4.409	0	0	0	0	0	0	0	1.5304	2.5291	4.8097
1788	N-terminal acetyltransferase B complex catalytic subunit NAT3 OS=Saccharomyces cerevisiae (strain ATCC 204508 / S288c) OX=559292 GN=NAT3 PE=1 SV=2	Q06504	23	2.3646	3.3461	2.1929	1.7636	0	0	0	0	0	0	0	3.0608	6.3226	7.2146
1789	Peptidyl-prolyl cis-trans isomerase C, mitochondrial OS=Saccharomyces cerevisiae (strain ATCC 204508 / S288c) OX=559292 GN=CPR3 PE=1 SV=1	P25719	20	1.1823	3.3461	5.4822	0.8818	0	0	0	0	0	0	0	1.5304	2.5291	2.4049
1790	DOA4-independent degradation protein 4 OS=Saccharomyces cerevisiae (strain ATCC 204508 / S288c) OX=559292 GN=DID4 PE=1 SV=2	P36108	26	0	0	4.3857	0	1.6786	0	0.80758	3.5005	1.0749	3.4622	2.6904	0	0	0
1791	54S ribosomal protein L40, mitochondrial OS=Saccharomyces cerevisiae (strain ATCC 204508 / S288c) OX=559292 GN=MRPL40 PE=1 SV=2	P36534	34	3.5469	5.0191	0	2.6454	0	0	0	0	0	0	0.89679	1.5304	3.7936	2.4049
1792	Alkylphosphocholine resistance protein LEM3 OS=Saccharomyces cerevisiae (strain ATCC 204508 / S288c) OX=559292 GN=LEM3 PE=1 SV=1	P42838	47	0	0	0	0	2.5179	1.7012	1.6152	3.5005	1.0749	3.4622	3.5871	0	0	0
1793	Ribonuclease H OS=Saccharomyces cerevisiae (strain ATCC 204508 / S288c) OX=559292 GN=RNH1 PE=1 SV=2	Q04740	39	2.3646	5.0191	1.0964	0.8818	0	0	0	0	0	0	0	1.5304	6.3226	4.8097
1794	Signal recognition particle subunit SRP21 OS=Saccharomyces cerevisiae (strain ATCC 204508 / S288c) OX=559292 GN=SRP21 PE=1 SV=3	P32342	18	1.1823	3.3461	0	0	0	0	1.6152	0	3.2247	6.0588	5.3807	0	0	1.2024
1795	Regulator of calcineurin 2 OS=Saccharomyces cerevisiae (strain ATCC 204508 / S288c) OX=559292 GN=RCN2 PE=1 SV=1	Q12044	29	3.5469	0	2.1929	5.2908	0	0	0	0	0	0	0	7.652	2.5291	3.6073
1796	Actin-regulating kinase PRK1 OS=Saccharomyces cerevisiae (strain ATCC 204508 / S288c) OX=559292 GN=PRK1 PE=1 SV=1	P40494	91	1.1823	5.0191	0	8.818	0	0	0	0	0	0	0	1.5304	0	2.4049
1797	Peptide transporter PTR2 OS=Saccharomyces cerevisiae (strain ATCC 204508 / S288c) OX=559292 GN=PTR2 PE=1 SV=2	P32901	68	0	0	0	0	2.5179	3.4024	2.4227	4.2006	0	1.7311	2.6904	0	0	0
1798	Dolichyl-phosphate-mannose--protein mannosyltransferase 1 OS=Saccharomyces cerevisiae (strain ATCC 204508 / S288c) OX=559292 GN=PMT1 PE=1 SV=1	P33775	93	0	0	0	0	2.5179	3.4024	3.2303	2.1003	0	2.5966	2.6904	0	0	0
1799	Trafficking protein particle complex II-specific subunit 130 OS=Saccharomyces cerevisiae (strain ATCC 204508 / S288c) OX=559292 GN=TRS130 PE=1 SV=1	Q03660	128	0	0	0	1.7636	0	0	4.0379	4.2006	0	0	0	1.5304	1.2645	3.6073
1800	Protein TRI1 OS=Saccharomyces cerevisiae (strain ATCC 204508 / S288c) OX=559292 GN=TRI1 PE=1 SV=1	Q05024	26	0	0	0	0	0	0	0	0	1.0749	4.3277	5.3807	1.5304	5.0581	2.4049
1801	Exosome complex component CSL4 OS=Saccharomyces cerevisiae (strain ATCC 204508 / S288c) OX=559292 GN=CSL4 PE=1 SV=1	P53859	32	0	0	0	0	1.6786	4.253	4.8455	4.9007	0	0.86554	0.89679	0	0	0
1802	RNA exonuclease 4 OS=Saccharomyces cerevisiae (strain ATCC 204508 / S288c) OX=559292 GN=REX4 PE=1 SV=1	Q08237	33	0	1.673	3.2893	1.7636	0	0	0	0	0	0	0	1.5304	8.8517	6.0121
1803	Nuclear division defective protein 1 OS=Saccharomyces cerevisiae (strain ATCC 204508 / S288c) OX=559292 GN=NDD1 PE=1 SV=1	Q08887	61	1.1823	1.673	0	6.1726	0	0	0	0	0	0	0	1.5304	6.3226	7.2146
1804	Regulator of Ty1 transposition protein 102 OS=Saccharomyces cerevisiae (strain ATCC 204508 / S288c) OX=559292 GN=RTT102 PE=1 SV=2	P53330	18	0	0	0	0.8818	0	0	3.2303	1.4002	0	5.1932	6.2775	0	0	0
1805	Adenylyltransferase and sulfurtransferase UBA4 OS=Saccharomyces cerevisiae (strain ATCC 204508 / S288c) OX=559292 GN=UBA4 PE=1 SV=1	P38820	49	0	0	0	0.8818	2.5179	2.5518	4.0379	6.3009	0	0	0	0	0	0
1806	Protein SOK1 OS=Saccharomyces cerevisiae (strain ATCC 204508 / S288c) OX=559292 GN=SOK1 PE=1 SV=2	P40317	101	0	0	15.35	1.7636	0.83931	0.85059	0.80758	0	0	0	0	0	0	0
1807	Chromatin-remodeling complexes subunit NGG1 OS=Saccharomyces cerevisiae (strain ATCC 204508 / S288c) OX=559292 GN=NGG1 PE=1 SV=1	P32494	79	0	0	0	0	0	0	0	0.7001	4.2997	6.9243	7.1743	0	0	0
1808	Vacuolar protein sorting-associated protein 52 OS=Saccharomyces cerevisiae (strain ATCC 204508 / S288c) OX=559292 GN=VPS52 PE=1 SV=2	P39904	74	0	0	0	0	2.5179	4.253	4.8455	3.5005	0	0	0	0	0	0
1809	Retrograde regulation protein 3 OS=Saccharomyces cerevisiae (strain ATCC 204508 / S288c) OX=559292 GN=RTG3 PE=1 SV=2	P38165	54	0	0	0	0	0	0	0	0	1.0749	0.86554	0.89679	27.547	0	0
1810	U6 snRNA-associated Sm-like protein LSm7 OS=Saccharomyces cerevisiae (strain ATCC 204508 / S288c) OX=559292 GN=LSM7 PE=1 SV=2	P53905	13	1.1823	1.673	1.0964	0.8818	1.6786	1.7012	2.4227	0.7001	0	0.86554	1.7936	1.5304	1.2645	2.4049
1811	Serine/threonine-protein kinase CHK1 OS=Saccharomyces cerevisiae (strain ATCC 204508 / S288c) OX=559292 GN=CHK1 PE=1 SV=1	P38147	60	3.5469	0	5.4822	2.6454	0.83931	0.85059	0	0.7001	1.0749	0.86554	0.89679	1.5304	2.5291	1.2024
1812	Chromatin structure-remodeling complex subunit SFH1 OS=Saccharomyces cerevisiae (strain ATCC 204508 / S288c) OX=559292 GN=SFH1 PE=1 SV=1	Q06168	49	1.1823	0	0	0.8818	0.83931	1.7012	1.6152	2.1003	2.1498	2.5966	2.6904	3.0608	0	0
1813	Chromatin structure-remodeling complex subunit RSC4 OS=Saccharomyces cerevisiae (strain ATCC 204508 / S288c) OX=559292 GN=RSC4 PE=1 SV=2	Q02206	72	1.1823	0	0	0	2.5179	0.85059	0.80758	2.1003	3.2247	2.5966	2.6904	3.0608	0	0
1814	Protein KTI12 OS=Saccharomyces cerevisiae (strain ATCC 204508 / S288c) OX=559292 GN=KTI12 PE=1 SV=2	P34253	35	0	0	0	0.8818	0	0	3.2303	1.4002	1.0749	1.7311	1.7936	0	1.2645	0
1815	Pre-mRNA-splicing factor SPP382 OS=Saccharomyces cerevisiae (strain ATCC 204508 / S288c) OX=559292 GN=SPP382 PE=1 SV=1	Q06411	83	0	0	0	2.6454	0.83931	0.85059	3.2303	2.1003	4.2997	0.86554	2.6904	0	0	0
1816	Periodic tryptophan protein 2 OS=Saccharomyces cerevisiae (strain ATCC 204508 / S288c) OX=559292 GN=PWP2 PE=1 SV=2	P25635	104	0	0	0	0	0	1.7012	1.6152	3.5005	2.1498	1.7311	0	0	0	0
1817	20S rRNA accumulation protein 4 OS=Saccharomyces cerevisiae (strain ATCC 204508 / S288c) OX=559292 GN=TSR4 PE=1 SV=2	P25040	46	1.1823	0	3.2893	0.8818	0.83931	0	4.0379	4.9007	0	0	0	1.5304	1.2645	0
1818	Cysteine proteinase 1, mitochondrial OS=Saccharomyces cerevisiae (strain ATCC 204508 / S288c) OX=559292 GN=LAP3 PE=1 SV=3	Q01532	55	3.5469	0	5.4822	3.5272	0.83931	0	0	0	0	0	0	3.0608	2.5291	1.2024
1819	Centromere DNA-binding protein complex CBF3 subunit B OS=Saccharomyces cerevisiae (strain ATCC 204508 / S288c) OX=559292 GN=CEP3 PE=1 SV=1	P40969	71	0	0	2.1929	2.6454	0	0	0.80758	0	1.0749	0	0	1.5304	2.5291	4.8097
1820	Antiviral protein SKI8 OS=Saccharomyces cerevisiae (strain ATCC 204508 / S288c) OX=559292 GN=SKI8 PE=1 SV=1	Q02793	44	0	0	0	0	1.6786	2.5518	4.8455	1.4002	1.0749	2.5966	2.6904	0	0	0
1821	Protein RFS1 OS=Saccharomyces cerevisiae (strain ATCC 204508 / S288c) OX=559292 GN=RFS1 PE=1 SV=1	P38234	23	3.5469	0	0	2.6454	0	0	0.80758	1.4002	0	0	0	7.652	2.5291	3.6073
1822	Transcription regulatory protein SNF6 OS=Saccharomyces cerevisiae (strain ATCC 204508 / S288c) OX=559292 GN=SNF6 PE=1 SV=1	P18888	38	0	0	0	0	4.1966	2.5518	2.4227	1.4002	1.0749	2.5966	0.89679	0	0	0
1823	Pheromone receptor transcription factor OS=Saccharomyces cerevisiae (strain ATCC 204508 / S288c) OX=559292 GN=MCM1 PE=1 SV=2	P11746	33	0	0	0	0	1.6786	2.5518	1.6152	1.4002	4.2997	3.4622	3.5871	0	0	0
1824	Inhibitory regulator protein IRA2 OS=Saccharomyces cerevisiae (strain ATCC 204508 / S288c) OX=559292 GN=IRA2 PE=1 SV=2	P19158	352	0	0	0	0.8818	0	0	0.80758	0	2.1498	5.1932	6.2775	0	0	1.2024
1825	Vacuolar protein-sorting-associated protein 24 OS=Saccharomyces cerevisiae (strain ATCC 204508 / S288c) OX=559292 GN=VPS24 PE=1 SV=1	P36095	26	0	0	1.0964	0	0.83931	0	0	2.8004	0	3.4622	1.7936	0	2.5291	2.4049
1826	Nascent polypeptide-associated complex subunit beta-1 OS=Saccharomyces cerevisiae (strain ATCC 204508 / S288c) OX=559292 GN=EGD1 PE=1 SV=2	Q02642	17	0	0	4.3857	0	0	0.85059	2.4227	2.1003	0	0	0.89679	1.5304	3.7936	0
1827	Uncharacterized protein YCR043C OS=Saccharomyces cerevisiae (strain ATCC 204508 / S288c) OX=559292 GN=YCR043C PE=1 SV=1	P25361	15	0	0	0	0	3.3572	2.5518	0.80758	2.1003	3.2247	2.5966	3.5871	0	0	0
1828	Vacuolar transporter chaperone 1 OS=Saccharomyces cerevisiae (strain ATCC 204508 / S288c) OX=559292 GN=VTC1 PE=1 SV=3	P40046	14	0	0	0	0	3.3572	0.85059	1.6152	0.7001	2.1498	2.5966	2.6904	0	0	0
1829	Protein FYV10 OS=Saccharomyces cerevisiae (strain ATCC 204508 / S288c) OX=559292 GN=FYV10 PE=1 SV=1	P40492	60	0	0	0	0	0.83931	0.85059	2.4227	2.1003	5.3746	3.4622	3.5871	0	0	0
1830	Ubiquitin-conjugating enzyme E2 2 OS=Saccharomyces cerevisiae (strain ATCC 204508 / S288c) OX=559292 GN=RAD6 PE=1 SV=1	P06104	20	0	0	0	0	1.6786	1.7012	1.6152	1.4002	7.5244	1.7311	3.5871	0	0	0
1831	Protein SAN1 OS=Saccharomyces cerevisiae (strain ATCC 204508 / S288c) OX=559292 GN=SAN1 PE=1 SV=1	P22470	66	0	0	0	0	2.5179	1.7012	0.80758	4.9007	0	4.3277	1.7936	0	0	1.2024
1832	SERF-like protein YDL085C-A OS=Saccharomyces cerevisiae (strain ATCC 204508 / S288c) OX=559292 GN=YDL085C-A PE=1 SV=1	Q3E7B7	8	2.3646	6.6921	4.3857	3.5272	0	0	0	0	0	0	0	1.5304	2.5291	3.6073
1833	Class E vacuolar protein-sorting machinery protein HSE1 OS=Saccharomyces cerevisiae (strain ATCC 204508 / S288c) OX=559292 GN=HSE1 PE=1 SV=1	P38753	51	2.3646	0	1.0964	5.2908	2.5179	0.85059	0	4.9007	0	0	0	1.5304	0	0
1834	Cytoplasmic tRNA 2-thiolation protein 2 OS=Saccharomyces cerevisiae (strain ATCC 204508 / S288c) OX=559292 GN=NCS2 PE=1 SV=1	P53923	56	0	0	1.0964	0.8818	2.5179	4.253	1.6152	3.5005	0	0	0	0	0	0
1835	Glucose-induced degradation protein 7 OS=Saccharomyces cerevisiae (strain ATCC 204508 / S288c) OX=559292 GN=GID7 PE=1 SV=2	P25569	85	0	0	0	0	2.5179	2.5518	3.2303	2.8004	0	0.86554	0.89679	0	0	0
1836	Guanine nucleotide exchange factor subunit RGP1 OS=Saccharomyces cerevisiae (strain ATCC 204508 / S288c) OX=559292 GN=RGP1 PE=1 SV=2	P16664	75	0	0	0	0	0.83931	2.5518	2.4227	6.3009	0	0.86554	0.89679	0	0	0
1837	U3 small nucleolar RNA-associated protein 4 OS=Saccharomyces cerevisiae (strain ATCC 204508 / S288c) OX=559292 GN=UTP4 PE=1 SV=1	Q06679	88	1.1823	0	0	0	0	0	2.4227	0	2.1498	4.3277	3.5871	0	0	0
1838	Mitochondrial F-box protein MFB1 OS=Saccharomyces cerevisiae (strain ATCC 204508 / S288c) OX=559292 GN=MFB1 PE=1 SV=1	Q04922	53	5.9115	0	0	7.9362	0	0	0	0.7001	0	0.86554	0	1.5304	0	0
1839	Homoaconitase, mitochondrial OS=Saccharomyces cerevisiae (strain ATCC 204508 / S288c) OX=559292 GN=LYS4 PE=1 SV=1	P49367	75	4.7292	1.673	6.5786	5.2908	0	0	0	0	0	0	0	0	1.2645	0
1840	60S ribosomal subunit assembly/export protein LOC1 OS=Saccharomyces cerevisiae (strain ATCC 204508 / S288c) OX=559292 GN=LOC1 PE=1 SV=1	P43586	24	0	0	1.0964	0	0	0	0	0	4.2997	6.0588	7.1743	0	1.2645	0
1841	Putative cystathionine gamma-synthase YML082W OS=Saccharomyces cerevisiae (strain ATCC 204508 / S288c) OX=559292 GN=YML082W PE=1 SV=1	Q04533	74	0	0	0	0	1.6786	1.7012	4.8455	5.6008	0	0	0	0	0	0
1842	Arrestin-related trafficking adapter 6 OS=Saccharomyces cerevisiae (strain ATCC 204508 / S288c) OX=559292 GN=ALY1 PE=1 SV=1	P36117	103	0	0	0	0	4.1966	5.1035	0.80758	4.9007	0	0	0	0	0	0
1843	DnaJ-like protein 1 OS=Saccharomyces cerevisiae (strain ATCC 204508 / S288c) OX=559292 GN=DJP1 PE=1 SV=1	P40564	49	0	0	0	0	4.1966	2.5518	0.80758	7.7011	0	0	0	0	0	0
1844	Isocitrate dehydrogenase [NADP] OS=Saccharomyces cerevisiae (strain ATCC 204508 / S288c) OX=559292 GN=IDP3 PE=3 SV=1	P53982	48	4.7292	0	0	0	0	0	0	0	0	0	0	3.0608	1.2645	3.6073
1845	SAGA-associated factor 73 OS=Saccharomyces cerevisiae (strain ATCC 204508 / S288c) OX=559292 GN=SGF73 PE=1 SV=1	P53165	73	0	0	0	0	0	0	0	0	1.0749	7.7899	8.9679	0	0	0
1846	Glycogen debranching enzyme OS=Saccharomyces cerevisiae (strain ATCC 204508 / S288c) OX=559292 GN=GDB1 PE=1 SV=1	Q06625	175	0	0	0	0	0	0	6.4607	7.7011	0	0	0	0	0	0
1847	(R,R)-butanediol dehydrogenase OS=Saccharomyces cerevisiae (strain ATCC 204508 / S288c) OX=559292 GN=BDH1 PE=1 SV=2	P39714	42	1.1823	1.673	2.1929	1.7636	1.6786	0	2.4227	0.7001	2.1498	0.86554	0.89679	0	1.2645	1.2024
1848	Mediator of RNA polymerase II transcription subunit 3 OS=Saccharomyces cerevisiae (strain ATCC 204508 / S288c) OX=559292 GN=PGD1 PE=1 SV=2	P40356	43	0	1.673	0	1.7636	1.6786	0.85059	0	0.7001	1.0749	3.4622	2.6904	0	1.2645	1.2024
1849	Small nuclear ribonucleoprotein Sm D3 OS=Saccharomyces cerevisiae (strain ATCC 204508 / S288c) OX=559292 GN=SMD3 PE=1 SV=1	P43321	11	1.1823	0	1.0964	0.8818	0	0	1.6152	1.4002	3.2247	2.5966	1.7936	1.5304	1.2645	0
1850	Ran-specific GTPase-activating protein 1 OS=Saccharomyces cerevisiae (strain ATCC 204508 / S288c) OX=559292 GN=YRB1 PE=1 SV=1	P41920	23	2.3646	1.673	3.2893	3.5272	0	0	0	1.4002	0	0.86554	0.89679	3.0608	2.5291	2.4049
1851	KH domain-containing protein YLL032C OS=Saccharomyces cerevisiae (strain ATCC 204508 / S288c) OX=559292 GN=YLL032C PE=1 SV=1	Q07834	95	2.3646	1.673	1.0964	5.2908	0.83931	0	0.80758	0	1.0749	0	0.89679	1.5304	1.2645	0
1852	13 ribonucleoprotein-associated protein OS=Saccharomyces cerevisiae (strain ATCC 204508 / S288c) OX=559292 GN=SNU13 PE=1 SV=1	P39990	14	0	1.673	2.1929	0.8818	0	0	0	0	3.2247	1.7311	1.7936	0	1.2645	0
1853	Non-structural maintenance of chromosome element 3 OS=Saccharomyces cerevisiae (strain ATCC 204508 / S288c) OX=559292 GN=NSE3 PE=1 SV=1	Q05541	34	2.3646	0	2.1929	3.5272	0	0.85059	1.6152	1.4002	0	0	0	0	3.7936	1.2024
1854	Cullin-3 OS=Saccharomyces cerevisiae (strain ATCC 204508 / S288c) OX=559292 GN=CUL3 PE=1 SV=1	P53202	86	1.1823	0	4.3857	1.7636	3.3572	1.7012	1.6152	2.1003	1.0749	0	0	0	0	1.2024
1855	Proteasome chaperone 1 OS=Saccharomyces cerevisiae (strain ATCC 204508 / S288c) OX=559292 GN=PBA1 PE=1 SV=2	Q05778	31	0	0	0	0	3.3572	2.5518	3.2303	2.1003	1.0749	0.86554	0.89679	1.5304	0	0
1856	Transcription factor tau 55 subunit OS=Saccharomyces cerevisiae (strain ATCC 204508 / S288c) OX=559292 GN=TFC7 PE=1 SV=1	Q12415	49	0	0	0	0	2.5179	4.253	2.4227	2.1003	1.0749	0.86554	1.7936	1.5304	0	0
1858	RNases MRP/P 32.9 subunit OS=Saccharomyces cerevisiae (strain ATCC 204508 / S288c) OX=559292 GN=POP4 PE=1 SV=1	P38336	33	0	0	0	0	1.6786	0.85059	2.4227	4.2006	1.0749	2.5966	0.89679	0	0	0
1859	Ribosomal lysine N-methyltransferase 3 OS=Saccharomyces cerevisiae (strain ATCC 204508 / S288c) OX=559292 GN=RKM3 PE=1 SV=1	P38222	63	3.5469	0	0	3.5272	0.83931	0.85059	2.4227	1.4002	1.0749	0	0	0	0	0
1860	mRNA 3'-end-processing protein YTH1 OS=Saccharomyces cerevisiae (strain ATCC 204508 / S288c) OX=559292 GN=YTH1 PE=1 SV=1	Q06102	25	0	0	0	0	0.83931	1.7012	1.6152	2.1003	1.0749	3.4622	2.6904	0	0	0
1861	Cold sensitive U2 snRNA suppressor 1 OS=Saccharomyces cerevisiae (strain ATCC 204508 / S288c) OX=559292 GN=CUS1 PE=1 SV=1	Q02554	50	0	0	0	0	2.5179	2.5518	0.80758	0.7001	3.2247	6.0588	1.7936	0	0	0
[truncated: 1,097 more rows]
